# Supplementary material for: The genetic basis of aneuploidy tolerance in wild yeast
Source: eLife journal article supplement (doi:10.7554/elife.52063), 2020-01-07
Supplement: supp [file elife-52063-supp-v1.zip]

## Clustal Omega alignment of YPS1009 and seven other strains with truncated alleles.

Fasta files were recapitulated by mapping SNPs from the published vcf file () onto the S288c sequence and performing a multiple alignment using Clustal Omega (<https://www.ebi.ac.uk/Tools/msa/clustalo/>). Allelic differences are highlighted in yellow below. Only the YPS1009 sequence is shown beyond amino acid 840.

```
CH02_IvoryCoast_AVN:YDR293C      MSKNSNVNNSRQEPNNMFVQTTGGGKNAPKQIHVAHRRSQSELNLMIEQFTLQKQLEQ 60
CH13_IvoryCoast_AVT:YDR293C      MSKNSNVNNSRQEPNNMFVQTTGGGKNAPKQIHVAHRRSQSELNLMIEQFTLQKQLEQ 60
YPS1009_ADF:YDR293C              MSKNSNVNNSRQEPNNMFVQTTGGGKNAPKQIHVAHRRSQSELNLMIEQFTLQKQLEQ 60
CBS6308_AleBeer                   MSKNSNVNNSRQEPNNMFVQTTGGGKNAPKQIHVAHRRSQSELNLMIEQFTLQKQLEQ 60
CBK_Insect_Mosaic:YDR293C         MSKNSNVNNSRQEPNNMFVQTTGGGKNAPKQIHVAHRRSQSELNLMIEQFTLQKQLEQ 60
W303                               MSKNSNVNNSRQEPNNMFVQTTGGGKNAPKQIHVAHRRSQSELNLMIEQFTLQKQLEQ 60
CBL_InsectMosaic:YDR293C          MSKNSNVNNSRQEPNNMFVQTTGGGKNAPKQIHVAHRRSQSELNLMIEQFTLQKQLEQ 60
CBM_InsectMosaic:YDR293C          MSKNSNVNNSRQEPNNMFVQTTGGGKNAPKQIHVAHRRSQSELNLMIEQFTLQKQLEQ 60
*****
```

```
CH02_IvoryCoast_AVN:YDR293C      VQAQQQLMAQQQQLAQQTGOYLSGNSGSNNHFTPPPPHYNSNGNSPGMSAGGSRRT 120
CH13_IvoryCoast_AVT:YDR293C      VQAQQQLMAQQQQLAQQTGOYLSGNSGSNNHFTPPPPHYNSNGNSPGMSAGGSRRT 120
YPS1009_ADF:YDR293C              VQAQQQLMAQQQQLAQQTGOYLSGNSGSNNHFTPPPPHYNSNGNSPGMSAGGSRRT 120
CBS6308_AleBeer                   VQAQQQLMAQQQQLAQQTGOYLSGNSGSNNHFTPPPPHYNSNGNSPGMSAGGSRRT 120
CBK_Insect_Mosaic:YDR293C         VQAQQQLMAQQQQLAQQTGOYLSGNSGSNNHFTPPPPHYNSNGNSPGMSAGGSRRT 120
W303                               VQAQQQLMAQQQQLAQQTGOYLSGNSGSNNHFTPPPPHYNSNGNSPGMSAGGSRRT 120
CBL_InsectMosaic:YDR293C          VQAQQQLMAQQQQLAQQTGOYLSGNSGSNNHFTPPPPHYNSNGNSPGMSAGGSRRT 120
CBM_InsectMosaic:YDR293C          VQAQQQLMAQQQQLAQQTGOYLSGNSGSNNHFTPPPPHYNSNGNSPGMSAGGSRRT 120
*****
```

```
CH02_IvoryCoast_AVN:YDR293C      HSRNNSGYHNSYDNNNSNPNPNSHRKTSSQSSYGHRRHSLGLNEAKKAAEEQAK 180
CH13_IvoryCoast_AVT:YDR293C      HSRNNSGYHNSYDNNNSNPNPNSHRKTSSQSSYGHRRHSLGLNEAKKAAEEQAK 180
YPS1009_ADF:YDR293C              HSRNNSGYHNSYDNNNSNPNPNSHRKTSSQSSYGHRRHSLGLNEAKKAAEEQAK 180
CBS6308_AleBeer                   HSRNNSGYHNSYDNNNSNPNPNSHRKTSSQSSYGHRRHSLGLNEAKKAAEEQAK 180
CBK_Insect_Mosaic:YDR293C         HSRNNSGYHNSYDNNNSNPNPNSHRKTSSQSSYGHRRHSLGLNEAKKAAEEQAK 180
W303                               HSRNNSGYHNSYDNNNSNPNPNSHRKTSSQSSYGHRRHSLGLNEAKKAAEEQAK 180
CBL_InsectMosaic:YDR293C          HSRNNSGYHNSYDNNNSNPNPNSHRKTSSQSSYGHRRHSLGLNEAKKAAEEQAK 180
CBM_InsectMosaic:YDR293C          HSRNNSGYHNSYDNNNSNPNPNSHRKTSSQSSYGHRRHSLGLNEAKKAAEEQAK 180
*****
```

```
CH02_IvoryCoast_AVN:YDR293C      RISGVKQA*----- 188
CH13_IvoryCoast_AVT:YDR293C      RISGGEAGVTVKMDSVQADSGSSTTEQSDFKFPPPPNAHQHRRATSNLSPPSFKFPPN 240
YPS1009_ADF:YDR293C              RISGGEAGVTVKIDSVDQADSGSNFTTEQSDFKFPPPPNAHQHRRATSNLSPPSFKFPPN 240
CBS6308_AleBeer                   RISGGEAGVTVKIDSVDQADSGSNSTTEQSDFKFPPPPNAHQHRRATSNLSPPSFKFPPN 240
CBK_Insect_Mosaic:YDR293C         RISGGEAGVTVKIDSVDQADSGSNSTTEQSDFKFPPPPNAHQHRRATSNLSPPSFKFPPN 240
W303                               RISGGEAGVTVKIDSVDQADSGSNSTTEQSDFKFPPPPNAHQHRRATSNLSPPSFKFPPN 240
CBL_InsectMosaic:YDR293C          RISGGEAGVTVKIDSVDQADSGSNSTTEQSDFKFPPPPNAHQHRRATSNLSPPSFKFPPN 240
CBM_InsectMosaic:YDR293C          RISGGEAGVTVKIDSVDQADSGSNSTTEQSDFKFPPPPNAHQHRRATSNLSPPSFKFPPN 240
**** :
```

```
CH02_IvoryCoast_AVN:YDR293C      ----- 188
CH13_IvoryCoast_AVT:YDR293C      SHGDNDEFIATSSTHRRSKTRNNEYSPGINSNWRNQSQQPQQQLSPFRHRGNSRDYNS 300
YPS1009_ADF:YDR293C              SHGDNDEFIATSSTHRRSKTRNNEYSPGINSNWRNQSQQPQQQLSPFRHRGNSRDYNS 300
CBS6308_AleBeer                   SHGDNDEFIATSSTHRRSKTRNNEYSPGINSNWRNQSQQPQQQLSPFRHRGNSRDYNS 300
CBK_Insect_Mosaic:YDR293C         SHGDNDEFIATSSTHRRSKTRNNEYSPGINSNWRNQSQQPQQQLSPFRHRGNSRDYNS 300
W303                               SHGDNDEFIATSSTHRRSKTRNNEYSPGINSNWRNQSQQPQQQLSPFRHRGNSRDYNS 300
CBL_InsectMosaic:YDR293C          SHGDNDEFIATSSTHRRSKTRNNEYSPGINSNWRNQSQQPQQQLSPFRHRGNSRDYNS 300
CBM_InsectMosaic:YDR293C          SHGDNDEFIATSSTHRRSKTRNNEYSPGINSNWRNQSQQPQQQLSPFRHRGNSRDYNS 300
```

```
CH02_IvoryCoast_AVN:YDR293C      ----- 188
CH13_IvoryCoast_AVT:YDR293C      FNTLEPPAIFQGGHKHRASNSSVHSFSSQGNNGGGRKSLFAPYLPQANIPELIQEGLV 360
YPS1009_ADF:YDR293C              FNTLEPPAIFQGGHKHRASNSSVHSFSSQGNNGGGRKSLFAPYLPQANIPELIQEGLV 360
CBS6308_AleBeer                   FNTLEPPAIFQGGHKHRASNSSVHSFSSQGNNGGGRKSLFAPYLPQANIPELIQEGLV 360
CBK_Insect_Mosaic:YDR293C         FNTLEPPAIFQGGHKHRASNSSVHSFSSQGNNGGGRKSLFAPYLPQANIPELIQEGLV 360
W303                               FNTLEPPAIFQGGHKHRASNSSVHSFSSQGNNGGGRKSLFAPYLPQANIPELIQEGLV 360
```

CBL\_InsectMosaic:YDR293C FNTLEPPAIFQQGHKHRASNSSVHSFSSQGNNGGGRKSLFAPYLPQANIPELIQEGRV 360  
CBM\_InsectMosaic:YDR293C FNTLEPPAIFQQGHKHRASNSSVHSFSSQGNNGGGRKSLFAPYLPQANIPELIQEGRV 360

CH02\_IvoryCoast\_AVN:YDR293C ----- 188  
CH13\_IvoryCoast\_AVT:YDR293C AGILRVNKKNRSDAWVSTDGALDADIYICGSKDRNRALEGDLVAVELLVDDVWESKKEK 420  
YPS1009\_ADF:YDR293C AGILRVNKKNRSDAWVSTDGALDADIYICGSKDRNRALEGDLVAVELLVDDVWESKKEK 420  
CBS6308\_AleBeer AGILRVNKKNRSDAWVSTDGALDADIYICGSKDRNRALEGDLVAVELLVDDVWESKKEK 420  
CBK\_Insect\_Mosaic:YDR293C AGILRVNKKNRSDAWVSTDGALDADIYICGSKDRNRALEGDLVAVELLVDDVWESKKEK 420  
W303 AGILRVNKKNRSDAWVSTDGALDADIYICGSKDRNRALEGDLVAVELLVDDVWESKKEK 420  
CBL\_InsectMosaic:YDR293C AGILRVNKKNRSDAWVCTDGALDADIYICGSKDRNRALEGDLVAVELLVDDVWESKKEK 420  
CBM\_InsectMosaic:YDR293C AGILRVNKKNRSDAWVCTDGALDADIYICGSKDRNRALEGDLVAVELLVDDVWESKKEK 420

CH02\_IvoryCoast\_AVN:YDR293C ----- 188  
CH13\_IvoryCoast\_AVT:YDR293C EEKRRKRDASMQHDLIP\*----- 437  
YPS1009\_ADF:YDR293C EEKRRKRDASMQHDLIPLNSSDDYHNDASVTAATSNNFLSSPSSSDSLSKDDLVRKRK 480  
CBS6308\_AleBeer EEKRRKRDASMQHDLIPNSSDDYHNDASVTAATSNNFLSSPSSSDSLSKDDLVRKRK 480  
CBK\_Insect\_Mosaic:YDR293C EEKRRKRDASMQHDLIPLNSSDDYHNDASVTAATSNNFLSSPSSSDSLSKDDLVRKRK 480  
W303 EEKRRKRDASMQHDLIPLNSSDDYHNDASVTAATSNNFLSSPSSSDSLSKDDLVRKRK 480  
CBL\_InsectMosaic:YDR293C EEKRRKRDASMQHDLIPLNSSDDYHNDASVTAATSNNFLSSPSSSDSLSKDDLVRKRK 480  
CBM\_InsectMosaic:YDR293C EEKRRKRDASMQHDLIPLNSSDDYHNDASVTAATSNNFLSSPSSSDSLSKDDLVRKRK 480

CH02\_IvoryCoast\_AVN:YDR293C ----- 188  
CH13\_IvoryCoast\_AVT:YDR293C ----- 437  
YPS1009\_ADF:YDR293C STINNDSDSLSSPTKSGVRRRSSLKQRPTQKKNDDVEVEGQSLLLVEEEEINDKYKPLYA 540  
CBS6308\_AleBeer STINNDSDSLSSPTKSGVRRRSSLKQRPTQKKNDDVEVEGQSLLLVEEEEINDKYKPLYA 540  
CBK\_Insect\_Mosaic:YDR293C STINNDSDSLSSPTKSGVRRRSSLKQRPTQKKNDDVEVEGQSLLLVEEEEINDKYKPLYA 540  
W303 STINNDSDSLSSPTKSGVRRRSSLKQRPTQKKNDDVEVEGQSLLLVEEEEINDKYKPLYA 540  
CBL\_InsectMosaic:YDR293C STINNDSDSLSSPTKSGVRRRSSLKQRPTQKKNDDVEVEGQSLLLVEEEEINDKYKPLYA 540  
CBM\_InsectMosaic:YDR293C STINNDSDSLSSPTKSGVRRRSSLKQRPTQKKNDDVEVEGQSLLLVEEEEINDKYKPLYA 540

CH02\_IvoryCoast\_AVN:YDR293C ----- 188  
CH13\_IvoryCoast\_AVT:YDR293C ----- 437  
YPS1009\_ADF:YDR293C GHVVAVLDRIPGQLFSGTLGLLRPSQQANSNNKPPQSPKIAWFKPTDKKVPLIAIPTEL 600  
CBS6308\_AleBeer GHVVAVLDRIPGQLFSGTLGLLRPSQQANSNNKPPQSPKIAWFKPTDKKVPLIAIPTEL 600  
CBK\_Insect\_Mosaic:YDR293C GHVVAVLDRIPGQLFSGTLGLLRPSQQANSNNKPPQSPKIAWFKPTDKKVPLIAIPTEL 600  
W303 GHVVAVLDRIPGQLFSGTLGLLRPSQQANSNNKPPQSPKIAWFKPTDKKVPLIAIPTEL 600  
CBL\_InsectMosaic:YDR293C GHVVAVLDRIPGQLFSGTLGLLRPSQQANSNNKPPQSPKIAWFKPTDKKVPLIAIPTEL 600  
CBM\_InsectMosaic:YDR293C GHVVAVLDRIPGQLFSGTLGLLRPSQQANSNNKPPQSPKIAWFKPTDKKVPLIAIPTEL 600

CH02\_IvoryCoast\_AVN:YDR293C ----- 188  
CH13\_IvoryCoast\_AVT:YDR293C ----- 437  
YPS1009\_ADF:YDR293C APKDFVENADKYSEKLFVASIKRWPITSLHPFGILVSELGDIHDPDTEIDSILRDNFLS 660  
CBS6308\_AleBeer APKDFVENADKYSEKLFVASIKRWPITSLHPFGILVSELGDIHDPDTEIDFILRDNFLS 660  
CBK\_Insect\_Mosaic:YDR293C APKDFVENADKYSEKLFVASIKRWPITSLHPFGILVSELGDIHDPDTEIDSILRDNFLS 660  
W303 APKDFVENADKYSEKLFVASIKRWPITSLHPFGILVSELGDIHDPDTEIDSILRDNFLS 660  
CBL\_InsectMosaic:YDR293C APKDFVENADKYSEKLFVASIKRWPITSLHPFGILVSELGDIHDPDTEIDSILRDNFLS 660  
CBM\_InsectMosaic:YDR293C APKDFVENADKYSEKLFVASIKRWPITSLHPFGILVSELGDIHDPDTEIDSILRDNFLS 660

CH02\_IvoryCoast\_AVN:YDR293C ----- 188  
CH13\_IvoryCoast\_AVT:YDR293C ----- 437  
YPS1009\_ADF:YDR293C NEYLDQKNPQKEKPSFQPLPLTAESLEYRRNFTDNEYNIFAISELGWVSEFALHVRNNG 720  
CBS6308\_AleBeer NEYLDQKNPQKEKPSFQPLPLTAESLEYRRNFTDNEYNIFAISELGWVSEFALHVRNNG 720  
CBK\_Insect\_Mosaic:YDR293C NEYLDQKNPQKEKPSFQPLPLTAESLEYRRNFTDNE\*----- 697  
W303 NEYLDQKNPQKEKPSFQPLPLTAESLEYRRNFTDNE\*----- 697  
CBL\_InsectMosaic:YDR293C NEYLDQKNPQKEKPSFQPLPLTAESLEYRRNFTDNE\*----- 697  
CBM\_InsectMosaic:YDR293C NEYLDQKNPQKEKPSFQPLPLTAESLEYRRNFTDNE\*----- 697

CH02\_IvoryCoast\_AVN:YDR293C ----- 188

CH13\_IvoryCoast\_AVT:YDR293C ----- 437  
 YPS1009\_ADF:YDR293C NGTLELGCHVVDVTSHEEGSSVDRRARKRSSAVFMPQKLVNLLPQSFNDELSLAPGKES 780  
 CBS6308\_AleBeer NGTLELGCHVVDVTSHEEGSSVDRRARKRSSAVFMPQKLVNLLPQSFNDELSLALARNQ 780  
 CBK\_Insect\_Mosaic:YDR293C ----- 697  
 W303 ----- 697  
 CBL\_InsectMosaic:YDR293C ----- 697  
 CBM\_InsectMosaic:YDR293C ----- 697

CH02\_IvoryCoast\_AVN:YDR293C ----- 188  
 CH13\_IvoryCoast\_AVT:YDR293C ----- 437  
 YPS1009\_ADF:YDR293C ATLSVVYTLDSSTLRKSTWVGESTISPSNLSLEQLDEKLSLSTVQEIARSF 840  
 CBS6308\_AleBeer PRCRL-FTL\* ----- 788

YPS1009\_ADF:YDR293C YARRINDPEATLLPTLSLLESLDDEKVKVDLNLDRTLGFVVINEIKRKVNSTVAEKIYT 900  
 YPS1009\_ADF:YDR293C KLGDLALLRRQMQUIATKMASFRKKIQNFGYNFDNTADELIKGLKIKDDDVRVGIEIL 960  
 YPS1009\_ADF:YDR293C LFKTMPRARYFIAGKVDPDQYGHYALNLPYIYTHFTAPMRRYADHVHRQLKAVIHDPYT 1020  
 YPS1009\_ADF:YDR293C EDMEALKITSEYCNFKKDCAYQAQEQAIHLLCKTINDMGNTGQLLTMATVLQVYESSF 1080  
 YPS1009\_ADF:YDR293C DVFIPEFGIEKRVHGDQLPLIKAEDGTNRVLELHWQPGVDSATFIPADEKNPKSYRNSI 1140  
 YPS1009\_ADF:YDR293C KNKFRSTAAEIANIELDKEAESEPLISDPLSKELSDLHLTPVNLRLPSAGDNKQNPLEKF 1200  
 YPS1009\_ADF:YDR293C ISTTETRIENDNYIQEIHQLKIPILLRAEVMALPCLTVRALNPFMKRV\* 1250
