# Supplementary material for: The genetic basis of aneuploidy tolerance in wild yeast
Source: eLife. 2020 Jan 7;9:e52063. doi: 10.7554/eLife.52063 (PMC6970514; doi:10.7554/eLife.52063)
Supplement: Supplementary file 2. — Genes bound by Ssd1 (column 3), genes shown in Figure 2A (column 4), proteins shown in Figure 3 (column 5), log2(fold change) in mRNA abundance for denoted strains (columns 6–42), log2(fold change) in protein abundance for denoted strains (columns 46–56). [file elife-52063-supp2.xlsx]

## Sheet: YPS-NCYC-W303_NewData_log2Ratio
UID	NAME & ANNOTATION	Bound by Ssd1 (FDR < 0.05)	861 Differentially expressed in Fig 2A	301 Proteins more abundant in YPS1009_Chr12 ssd1 vs YPS1009_Chr12 wt (FDR < 0.05), Fig 2E	dYPS1009_Chr12-4n vs dYPS1009_Chr12-2n (aneupl vs. euploid) rep1 RNA log2(FC)	dYPS1009_Chr12-4n vs dYPS1009_Chr12-2n (aneupl vs. euploid) rep2 RNA log2(FC)	dYPS1009_Chr12-4n vs dYPS1009_Chr12-2n (aneupl vs. euploid) rep3 RNA log2(FC)	x RNA log2(FC)	hYPS1009_Chr12 vs hYPS1009 (aneup vs euploid) rep 1 RNA log2(FC)	hYPS1009_Chr12 vs hYPS1009 (aneup vs euploid) rep 2 RNA log2(FC)	hYPS1009_Chr12 vs hYPS1009 (aneup vs euploid) rep 3 RNA log2(FC)	hYPS1009_Chr12 vs hYPS1009 (aneup vs euploid) rep 4 RNA log2(FC)	RNA log2(FC)	hYPS1009 ssd1 vs YhPS1009 (euploids) rep 1 RNA log2(FC)	hYPS1009 ssd1 vs YhPS1009 (euploids) rep 2 RNA log2(FC)	hYPS1009 ssd1 vs YhPS1009 (euploids) rep 3 RNA log2(FC)	hYPS1009 ssd1 vs YhPS1009 (euploids) rep 4 RNA log2(FC)	RNA log2(FC)	hYPS1009_Chr12 ssd1 vs hYPS1009_Chr12 (aneuploids) rep1 RNA log2(FC)	hYPS1009_Chr12 ssd1 vs hYPS1009_Chr12 (aneuploids) rep2 RNA log2(FC)	hYPS1009_Chr12 ssd1 vs hYPS1009_Chr12 (aneuploids) rep3 RNA log2(FC)	hYPS1009_Chr12 ssd1 vs hYPS1009_Chr12 (aneuploids) rep4 RNA log2(FC)	x RNA log2(FC)	WA1_Chr8 vs WA1 rep 1 RNA log2(FC)	WA1_Chr8 vs WA1 rep 2 RNA log2(FC)	WA1_Chr8 vs WA1 rep 3 RNA log2(FC)	RNA log2(FC)	WA1 ssd1 vs WA1 wt (euploids) rep 1 RNA log2(FC)	WA1 ssd1 vs WA1 wt (euploids) rep 2 RNA log2(FC)	WA1 ssd1 vs WA1 wt (euploids) rep 3 RNA log2(FC)	RNA log2(FC)	WA1_Chr8 ssd1 vs WA1_Chr8 wt (aneuploids) rep 1 RNA log2(FC)	WA1_Chr8 ssd1 vs WA1_Chr8 wt (aneuploids) rep 2 RNA log2(FC)	WA1_Chr8 ssd1 vs WA1_Chr8 wt (aneuploids) rep 3 RNA log2(FC)	x RNA log2(FC)	W303 Disome 8 vs W303 euploid rep 1 RNA log2(FC)	W303 Disome 8 vs W303 euploid rep 2 RNA log2(FC)	W303 Disome 8,15 vs W303 euploid rep 1 RNA log2(FC)	W303 Disome 8,15 vs W303 euploid rep 2 RNA log2(FC)	W303 Disome 8,10,16 vs W303 euploid rep 1 RNA log2(FC)	W303 Disome 8,10,16 vs W303 euploid rep 2 RNA log2(FC)		UID	NAME	Aneuploid vs euploid: hYPS1009_Chr12 vs hYPS1009 rep1 PROTEIN log2(FC)	Aneuploid vs euploid: hYPS1009_Chr12 vs hYPS1009 rep2 PROTEIN log2(FC)	Aneuploid vs euploid: hYPS1009_Chr12 vs hYPS1009 rep3 PROTEIN log2(FC)	x Protein	Euploids: hYPS1009 ssd1 vs hYPS1009 wt - rep1 PROTEIN log2(FC)
YBR162C	YBR162C ... TOS1 biological process unknown molecular function unknown cell wall (sensu Fungi)* | YBR162W-A	yes	.	yes	0.080575	0.155777	0.583176		0.0294744	0.0328288	-0.00509774	0.34685		0.254763	0.300896	0.460341	0.309527		0.186256	0.23318	0.133666	0.0701995		-0.0590481	-0.11028	-0.0903243		0.395327	-0.1424	-0.0626902		-0.287594	-0.310705	-0.316643		-0.162725	-0.169726	-0.412163	0.0356976	-0.169473	-0.219908		YBR162C	YBR162C ... TOS1 biological process unknown molecular function unknown cell wall (sensu Fungi)* | YBR162W-A	0.069797	-0.078703	0.015148	0	0.746162
YDL055C	YDL055C ... PSA1 protein amino acid glycosylati mannose-1-phosphate guanylyltransfecytoplasm | YDL056W	yes	.	yes	0.037588	-0.042212	0.056913		-0.45272	-0.437004	-0.501271	-0.662532		-0.243146	0.0016229	-0.201639	-0.159961		0.252158	0.297449	0.274222	0.467678		0.101662	0.0924452	-0.00559427		0.428293	0.419633	0.349414		0.320679	0.289157	0.39738		-0.339916	-0.388605	-0.574026	-0.586835	-0.318284	-0.289333		YDL055C	YDL055C ... PSA1 protein amino acid glycosylati mannose-1-phosphate guanylyltransfecytoplasm | YDL056W	-0.157428	0.10072	-0.327209	0	0.378705
YFR033C	YFR033C ... QCR6 aerobic respiration* ubiquinol-cytochrome-c reductase acmitochondrion* | YFR034C	yes	.	yes	-0.542825	-0.650439	-0.930098		-1.17319	-1.20211	-0.948158	-1.51091		-1.10947	-0.684125	-0.502185	-0.690331		-0.097498	-0.855031	-0.228711	-0.405189		-0.516156	-0.432598	-0.162134		-0.370915	0.123798	0.24785		-0.187795	0.132598	-0.177471		-0.497566	-0.209845	-0.70617	-0.757721	-0.130914	-0.108144		YFR033C	YFR033C ... QCR6 aerobic respiration* ubiquinol-cytochrome-c reductase acmitochondrion* | YFR034C	-2.05766	-2.72886	-1.24982	0	-1.43031
YGR282C	YGR282C ... BGL2 cell wall organization and bio "glucan 1,3-beta-glucosidase activit"cell wall (sensu Fungi) | YGR283C	yes	.	yes	0.123152	0.538946	0.508582		-0.180351	-0.0751579	-0.300612	-0.0441846		0.880005	0.818863	0.701279	0.716157		0.754055	0.641382	0.821835	0.692942		-0.0485303	-0.0984519	-0.0405523		0.712836	0.555161	0.660501		0.42724	0.287608	0.363806		-0.129453	-0.0813359	0.146524	0.379327	0.938872	0.809454		YGR282C	YGR282C ... BGL2 cell wall organization and bio "glucan 1,3-beta-glucosidase activit"cell wall (sensu Fungi) | YGR283C	-0.198399	-0.374921	-0.097856	0	0.365576
YIL123W	YIL123W ... SIM1 microtubule cytoskeleton organ molecular function unknown cell wall (sensu Fungi) | YIL124W	yes	yes	yes	-0.924814	-0.345969	0.011501		-0.473803	-0.323167	-0.488645	-0.600671		0.880928	0.977359	0.584605	0.687845		1.18874	1.06386	1.32207	1.25472		0.0442179	0.0675518	0.371696		1.30819	0.718903	1.10414		1.26242	0.679418	0.835023		0.106825	-0.0237358	0.698604	1.0172	1.27957	0.873385		YIL123W	YIL123W ... SIM1 microtubule cytoskeleton organ molecular function unknown cell wall (sensu Fungi) | YIL124W	-0.550671	-0.732508	-0.526565	0	1.0597
YJL158C	YJL158C ... CIS3 cell wall organization and bio structural constituent of cell wallendoplasmic reticulum* | YJL159W	yes	yes	yes	-0.486772	-0.28324	0.332572		-1.07683	-0.898828	-1.09102	-0.714416		0.112531	0.161982	0.0575917	0.177207		1.00942	0.94227	0.803933	0.838908		0.222804	0.159395	0.247578		0.609566	0.298483	0.292538		0.233244	0.398539	0.0969988		-0.0219621	0.257683	1.26461	2.03012	0.125096	0.433213		YJL158C	YJL158C ... CIS3 cell wall organization and bio structural constituent of cell wallendoplasmic reticulum* | YJL159W	-0.59557	-0.650409	-1.02761	0	-0.498003
YJL159W	YJL159W ... HSP150 cell wall organization and bio structural constituent of cell wallcell wall (sensu Fungi) | YJL160C	yes	.	yes	0.436736	0.646208	1.11348		0.0211	0.265964	0.0376895	0.421029		0.525183	0.707723	0.589222	0.523906		0.737972	0.591226	0.75163	0.55369		-0.0289541	-0.174981	-0.178369		0.877112	0.265603	0.428532		0.16108	0.306819	0.325634		-0.243625	-0.115613	1.23071	1.67869	1.0079	1.01566		YJL159W	YJL159W ... HSP150 cell wall organization and bio structural constituent of cell wallcell wall (sensu Fungi) | YJL160C	0.155904	0.008983	0.077369	0	0.154679
YKL101W	YKL101W ... HSL1 protein amino acid phosphoryla protein kinase activity bud neck* | YKL102C	yes	.	yes	-0.365791	-0.337544	-0.479504		-0.266602	-0.436804	-0.116774	-0.22937		-1.07692	-0.0679525	-0.541426	0.150971		-0.0241354	0.13269	-0.117126	0.55172		0.138155	0.1556	0.16043		-0.167008	0.239716	0.172209		0.297915	0.269673	0.285091		0.136334	-0.0791021	0.178273	-0.185974	0.528436	0.477991		YKL101W	YKL101W ... HSL1 protein amino acid phosphoryla protein kinase activity bud neck* | YKL102C	-0.307247	-0.268601	-0.521842	0	0.537548
YKR042W	YKR042W ... UTH1 mitochondrion organization and molecular function unknown cell wall (sensu Fungi)* | YKR043C	yes	.	yes	-0.74628	-0.487603	-0.303052		-0.00540788	0.172602	-0.0984845	0.290069		-0.246037	-0.38569	-0.238887	-0.42455		0.441133	0.181476	0.266108	0.0788609		0.102707	-0.0360267	0.0333247		-0.083049	-0.56182	-0.426681		-0.485887	-0.455885	-0.514692		0.265281	0.288879	0.0559807	0.748408	-0.158128	-0.28227		YKR042W	YKR042W ... UTH1 mitochondrion organization and molecular function unknown cell wall (sensu Fungi)* | YKR043C	-0.189107	-0.414358	-0.220902	0	0.522289
YLR110C	YLR110C ... CCW12 cell wall organization and bio molecular function unknown cell wall (sensu Fungi) | YLR111W	yes	.	yes	0.478671	0.690934	1.0656		0.34443	0.534926	0.322317	0.639739		0.413726	0.563025	1.0705	0.534423		0.420305	0.459677	0.517373	0.295865		-0.229648	-0.0996393	-0.144106		0.86643	0.462079	0.347886		0.0933405	0.307648	0.00890043		-0.327477	-0.0899052	-0.112826	1.20858	0.0169799	0.10153		YLR110C	YLR110C ... CCW12 cell wall organization and bio molecular function unknown cell wall (sensu Fungi) | YLR111W	-0.488906	-0.495176	0.550269	0	-0.214577
YLR286C	YLR286C ... CTS1 cytokinesis, completion of sep endochitinase activity endoplasmic reticulum* | YLR287C	yes	yes	yes	1.40022	1.79293	2.0013		2.48675	2.66617	2.58261	2.76553		0.444703	0.523222	0.339602	0.373799		-0.543219	-0.58081	-0.409723	-0.624906		0.441	0.122969	0.20785		-0.0111728	-0.243077	-0.174402		-0.930722	-0.752699	-0.796684		-0.813355	-0.693619	-0.233192	-0.0942856	0.30119	0.283581		YLR286C	YLR286C ... CTS1 cytokinesis, completion of sep endochitinase activity endoplasmic reticulum* | YLR287C	2.3541	2.84576	2.09642	0	2.23095
YLR300W	YLR300W ... EXG1 cell wall organization and bio "glucan 1,3-beta-glucosidase activit"cell wall (sensu Fungi) | YLR301W	yes	yes	yes	0.640581	0.703322	1.03681		0.24055	0.323811	0.226553	0.490547		0.957149	0.932431	0.805248	0.924974		1.02873	1.02325	1.05994	0.986529		0.319241	0.164517	0.193707		1.22339	1.04273	1.0189		0.509314	0.606372	0.528596		0.0126197	0.06641	0.573017	0.700963	1.00693	0.917973		YLR300W	YLR300W ... EXG1 cell wall organization and bio "glucan 1,3-beta-glucosidase activit"cell wall (sensu Fungi) | YLR301W	-0.705429	-0.644645	0.034129	0	-0.655578
YML016C	YML016C ... PPZ1 sodium ion homeostasis protein serine/threonine phosphatascytoplasm* | YML017W	yes	.	yes	-0.01664	0.063768	0.404118		-0.00161657	0.176628	0.0153439	-0.189495		-0.314143	-0.0867712	0.0628368	-0.143649		0.224011	0.360848	0.186604	0.778799		-0.0319145	0.0109719	-0.171168		0.183746	0.523733	0.303328		0.147092	0.279693	0.37228		-0.215354	-0.0285897	0.293265	0.0427972	0.748855	0.935455		YML016C	YML016C ... PPZ1 sodium ion homeostasis protein serine/threonine phosphatascytoplasm* | YML017W	0.314021	-0.057036	0.150138	0	0.661368
YMR305C	YMR305C ... SCW10 conjugation with cellular fusi glucosidase activity cytoplasm* | YMR306C-A	yes	.	yes	0.157379	0.300304	0.733072		-0.15036	-0.163277	-0.23547	0.018077		0.173128	0.191438	0.0405133	-0.0071749		0.566055	0.601107	0.593776	0.455815		0.644425	0.493028	0.647726		0.679459	0.524468	0.661553		0.275288	0.25726	0.338095		0.513653	0.446377	1.30614	1.44149	1.25091	1.08495		YMR305C	YMR305C ... SCW10 conjugation with cellular fusi glucosidase activity cytoplasm* | YMR306C-A	-0.009229	-0.052822	-0.064222	0	-0.028288
YNL241C	YNL241C iESR cluster ZWF1 pentose-phosphate shunt glucose-6-phosphate 1-dehydrogenasecytoplasm | YNL242W	yes	.	yes	-0.461289	-0.136797	0.558616		0.0261202	0.403268	0.0993862	0.556296		0.670601	0.549466	0.236054	0.517875		0.704686	0.47362	0.557732	0.45951		0.10624	0.0472383	0.230273		-0.0279424	0.154275	0.470174		0.279968	0.197211	0.224232		-0.053967	-0.171707	-0.363705	-0.502457	-0.0844714	-0.246957		YNL241C	YNL241C iESR cluster ZWF1 pentose-phosphate shunt glucose-6-phosphate 1-dehydrogenasecytoplasm | YNL242W	-0.10953	0.120218	0.052499	0	0.046571
YOR036W	YOR036W ... PEP12 Golgi to vacuole transport t-SNARE activity Golgi apparatus* | YOR037W	yes	yes	yes	0.24508	0.246408	-0.552562		-0.491867	0.305044	0.589108	-0.335692		-0.760972	0.698557	0.884839	-0.0611872		0.646847	0.960885	0.862054	0.977881		-0.0723486	0.32323	0.537033		1.39691	1.36656	1.56377		1.18672	1.38396	1.0974		0.0515012	0.0945699	0.173286	0.743886	1.9505	1.80165		YOR036W	YOR036W ... PEP12 Golgi to vacuole transport t-SNARE activity Golgi apparatus* | YOR037W	0.317846	0.437182	-0.15709	0	0.949249
YPR159W	YPR159W ... KRE6 cell wall organization and bio glucosidase activity integral to membrane* | YPR160W	yes	.	yes	-0.044181	0.338185	0.475354		-0.093803	-0.115038	-0.194658	0.0134653		0.47771	0.435825	0.432552	0.354238		0.585545	0.669153	0.603143	0.630664		0.297357	0.201072	0.170383		0.709388	0.40318	0.402926		0.383892	0.28931	0.339445		-0.0129748	0.135202	1.49788	1.89794	0.520114	0.600801		YPR159W	YPR159W ... KRE6 cell wall organization and bio glucosidase activity integral to membrane* | YPR160W	-0.119279	-0.239031	-0.107191	0	0.369811
YDR293C	YDR293C ... SSD1 cell wall organization and bio RNA binding cytoplasm | YDR294C	yes	yes		0.132922	0.260388	0.212087		-0.222004	-0.207669	-0.112938	0.0095591		-6.46482	-6.02222	-5.76741	-6.62312		-6.32687	-8.43304	-6.71618	-6.60666		0.0656469	-0.04567	0.0174574		-6.86712	-6.96388	-7.58915		-6.97429	-7.38248	-7.58989		-0.12013	-0.137317	0.163119	0.141934	0.439675	0.475444		YDR293C	YDR293C ... SSD1 cell wall organization and bio RNA binding cytoplasm | YDR294C	0.270866	-0.061301	0.891022	0	-9.12856
YDR085C	YDR085C iESR cluster AFR1 signal transduction during con receptor signaling protein activitymating projection base | YDR086C	yes	yes		1.20792	0.920181	1.27161			-0.373028	-0.803209	-0.970088		0.132113	1.07707	0.299876	0.736056			1.63896	2.58195	2.45924		0.142989	0.814371	-0.00610888		2.31445	2.72869	2.87828		3.46512	2.64849	3.45094		-0.389155	-0.280618	0.513867	-0.27289	1.52228	1.57578		YDR085C	YDR085C iESR cluster AFR1 signal transduction during con receptor signaling protein activitymating projection base | YDR086C	#N/A	#N/A	#N/A	#N/A	#N/A
YHR143W	YHR143W ... DSE2 cell wall organization and bio "glucan 1,3-beta-glucosidase activit"cell wall (sensu Fungi)* | YHR143W-A	yes	yes		0.174638	0.377322	0.375203		2.33143	2.27703	2.50143	2.6544		-0.604852	-0.153885	0.23714	-0.172796		-1.74731	-1.87282	-2.13007	-1.90809		1.05549	0.913424	1.05443		-0.140452	-0.65318	-0.560517		-1.75697	-1.69235	-1.83651		0.542348	0.367412	0.832535	0.903364	1.22348	0.856144		YHR143W	YHR143W ... DSE2 cell wall organization and bio "glucan 1,3-beta-glucosidase activit"cell wall (sensu Fungi)* | YHR143W-A	#N/A	#N/A	#N/A	#N/A	#N/A
YGR041W	YGR041W ... BUD9 bud site selection molecular function unknown bud neck | YGR042W	yes	yes		0.275394	0.077551	0.195534		0.26104	0.437494	0.469673	0.414576		-1.60485	-0.49092	-0.720024	-1.12454		-0.797938	-1.40252	-1.12587	-1.22408		-0.0105942	-0.111231	-0.144762		-1.80657	-1.05502	-1.05023		-1.45048	-1.96815	-1.64143		-0.296994	-0.541578	-0.746049	-0.983383	-0.457134	-0.783018		YGR041W	YGR041W ... BUD9 bud site selection molecular function unknown bud neck | YGR042W	#N/A	#N/A	#N/A	#N/A	#N/A
YBR085C-A	YBR085C-A ... YBR085C-A biological process unknown molecular function unknown cytoplasm* | YBR085W	yes	yes		-0.240793	-0.299556	-0.114318		-0.897222	-0.757692	-0.292908	-0.65155		0.22727	-0.0384082	-0.205764	0.230165		1.94529	1.65734	1.54074	2.08783		0.309639	0.762762	0.148614		1.6446	1.30489	1.09009		1.57235	1.12093	1.39046		0.512475	0.573489	1.73253	1.62186	1.89198	1.71099		YBR085C-A	YBR085C-A ... YBR085C-A biological process unknown molecular function unknown cytoplasm* | YBR085W	-0.343716	-0.472416	0	0	0.398281
YPL163C	YPL163C ... SVS1 response to chemical substance molecular function unknown cell wall (sensu Fungi)* | YPL164C	yes	yes		-0.31866	0.009821	0.072097		-0.565811	-0.949057	-1.07252	-0.797537		0.052496	-0.369325	-0.759018	-0.331422		1.03856	1.08148	1.2518	0.858193		0.29802	0.359163	0.300115		0.845897	0.861048	0.867772		1.44708	1.10416	1.20009		0.255679	0.249605	1.8105	1.70522	1.10648	1.25054		YPL163C	YPL163C ... SVS1 response to chemical substance molecular function unknown cell wall (sensu Fungi)* | YPL164C	#N/A	#N/A	#N/A	#N/A	#N/A
YGL028C	YGL028C ... SCW11 cytokinesis, completion of sep "glucan 1,3-beta-glucosidase activit"cell wall (sensu Fungi) | YGL029W	yes	yes		-0.193325	0.043521	0.433363		1.1711	0.86798	1.02664	0.770836		0.519136	0.27475	0.317798	-0.329516		-0.823473	-0.717528	-1.04235	-1.29372		0.17482	-0.104438	0.0402611		-0.377746	-0.742093	-0.523395		-0.956665	-1.36496	-1.30632		-0.516992	-0.648546	-0.525169	-0.375965	0.140833	-0.249043		YGL028C	YGL028C ... SCW11 cytokinesis, completion of sep "glucan 1,3-beta-glucosidase activit"cell wall (sensu Fungi) | YGL029W	#N/A	#N/A	#N/A	#N/A	#N/A
YPR119W	YPR119W ... CLB2 G2/M transition of mitotic cel cyclin-dependent protein kinase regcytoplasm* | YPR120C	yes	yes		-0.635169	-0.410163	-0.386638		-0.372779	-0.697701	-0.357464	-0.411025		-1.00431	-0.848508	-2.11945	-0.849521		-0.691924	-0.698912	-0.961196	-0.651368		0.0825168	-0.0928159	-0.256456		-0.508523	-0.488857	-0.512552		-0.684214	-0.550319	-0.369854		-0.501411	-0.236648	0.106894	-0.652043	-0.535081	-0.27924		YPR119W	YPR119W ... CLB2 G2/M transition of mitotic cel cyclin-dependent protein kinase regcytoplasm* | YPR120C	-0.108673	-0.325221	-0.563312	0	-0.149618
YOR003W	YOR003W ... YSP3 protein catabolism peptidase activity cellular component unknown | YOR004W	yes	yes		0.172533	0.013097	0.300913		-0.80935	-0.373028	-0.107215	0.0888058		-1.03781	0.698557	-1.43709	0.145857		1.59438	2.10844	0.849426	1.01922		0.763357	-0.493463	-0.00610888		-0.62415	0.815835	1.28693		0.570965	1.47018	1.56352		0.310552	-0.0644667	0.79341	1.46343	2.21486	1.95004		YOR003W	YOR003W ... YSP3 protein catabolism peptidase activity cellular component unknown | YOR004W	-0.681218	-0.474755	-0.267059	0	-0.615442
YBR158W	YBR158W ... AMN1 negative regulation of exit fr protein binding cytoplasm* | YBR159W	yes	yes		0.392393	0.205412	0.338726		0.164178	0.383546	0.381398	0.0835881		-0.824818	-0.403693	-0.677404	-0.71436		-0.802956	-0.926432	-1.137	-0.690556		0.235622	0.0876269	0.14035		-0.641469	-0.480718	-0.275562		-0.517522	-0.519452	-0.532453		-0.402189	-0.576594	-0.865331	-0.996313	-0.345206	-0.431091		YBR158W	YBR158W ... AMN1 negative regulation of exit fr protein binding cytoplasm* | YBR159W	#N/A	#N/A	#N/A	#N/A	#N/A
YDL085W	YDL085W ... NDE2 ethanol fermentation* NADH dehydrogenase activity mitochondrion | YDL086W	yes	yes		-0.455049	-1.11028	-1.95896					1.67377			-2.36034							2.18915		0.657562	-0.124229	-0.328037				1.35731		1.61536	2.95828	-0.413401		0.133963	0.620031	2.73914	3.47724	3.12573	2.64821		YDL085W	YDL085W ... NDE2 ethanol fermentation* NADH dehydrogenase activity mitochondrion | YDL086W	#N/A	#N/A	#N/A	#N/A	#N/A
YKL185W	YKL185W ... ASH1 pseudohyphal growth* specific transcriptional repressor nucleus | YKL186C	yes	yes		-0.855888	-0.885303	-0.568165		-0.35607	-0.387331	-0.631448	-0.298018		-0.807766	-1.07112	-1.36539	-1.13076		-0.741063	-1.17565	-0.887963	-1.10555		-0.0615238	-0.141302	-0.372491		-0.117824	-0.0181773	-0.229699		-0.343891	-0.152754	-0.0131601		-0.45199	-0.322192	-0.311848	0.037617	-0.20508	-0.119819		YKL185W	YKL185W ... ASH1 pseudohyphal growth* specific transcriptional repressor nucleus | YKL186C	-0.323618	-0.28824	-0.722663	0	0.006158
YPL158C	YPL158C Ö AIM44 biological process unknown molecular function unknown | Protein of unknown function; GFP-fusion protein localizes to the bud neck; transcription is regulated by Swi5p; null mutant displays elevated frequency of mitochondrial genome lossYPL159C	yes	yes		0.013132	-0.087081	-0.421604		-0.364708	0.0752216	0.415726	-0.270737		-0.867887	-0.527793	-1.7857	-0.779901		-0.587227	-1.94467	-1.30303	-1.04127		0.19258	0.295916	-0.0553129		0.0617417	0.234336	0.0318802		-0.14857	-0.311912	-0.160214		-0.207046	-0.118029	0.588885	0.00650978	-0.321023	-0.367575		YPL158C	YPL158C Ö AIM44 biological process unknown molecular function unknown | Protein of unknown function; GFP-fusion protein localizes to the bud neck; transcription is regulated by Swi5p; null mutant displays elevated frequency of mitochondrial genome lossYPL159C	#N/A	#N/A	#N/A	#N/A	#N/A
YKR013W	YKR013W ... PRY2 biological process unknown molecular function unknown vacuole (sensu Fungi)* | YKR014C	yes	yes		-0.059886	0.220971	0.480031		-0.501246	-0.688664	-0.758831	-0.591505		0.0189026	0.163664	-0.197572	-0.120536		0.857814	1.16306	0.981634	0.817212		0.505559	0.520467	0.60878		0.979583	1.00678	0.978803		0.861338	0.757325	0.686857		0.0373292	0.102031	0.950422	1.35754	0.779719	0.703321		YKR013W	YKR013W ... PRY2 biological process unknown molecular function unknown vacuole (sensu Fungi)* | YKR014C	0	0	0	0	-0.582944
YMR114C	YMR114C ... YMR114C biological process unknown molecular function unknown cytoplasm* | YMR115W	yes	yes		-0.186853	-0.443221	-0.300978		-0.639425	-0.917348	-0.395785	-1.08112		-1.86789	-0.845763	0.221873	-0.728612		0.857414	0.582374	0.488837	1.38709		-0.102611	-0.361268	0.170769		-0.0702141	0.200546	0.703169		0.89529	1.17082	0.945053		0.542769	0.292867	0.799545	-1.53175	1.13739	0.784746		YMR114C	YMR114C ... YMR114C biological process unknown molecular function unknown cytoplasm* | YMR115W	#N/A	#N/A	#N/A	#N/A	#N/A
YMR096W	YMR096W ... SNZ1 pyridoxine metabolism* protein binding cellular component unknown | YMR097C	yes	yes		0.010615	-0.23816	0.025278		0.208572	-0.3995	0.0447876	-0.00139196		0.454041	-0.690485	-0.617662	-0.188044		0.16142	0.0905208	-0.183589	0.158718		-1.30264	-1.44157	-0.771644		0.546896	-0.599878	-0.134655		2.76781	1.76527	1.83814		0.761995	1.40346	2.72066	2.11734	1.79801	1.44954		YMR096W	YMR096W ... SNZ1 pyridoxine metabolism* protein binding cellular component unknown | YMR097C	#N/A	#N/A	#N/A	#N/A	#N/A
YFL042C	YFL042C ... YFL042C biological process unknown molecular function unknown cellular component unknown | YFL044C	yes	yes		0.304817	-0.395618	0.125054		0.0386473	0.960396	-0.00966014	-0.434756		-0.587779	0.0990953	-1.28509	-0.143649		0.0600433	0.623016	0.412888	0.843154		0.0292807	0.306406	0.202987		1.32542	0.40822	0.839975		1.06628	0.529036	0.995901		0.0821808	0.238602	0.0875566	-0.467618	0.450995	0.819877		YFL042C	YFL042C ... YFL042C biological process unknown molecular function unknown cellular component unknown | YFL044C	0.124957	-0.263676	0.863017	0	0.258013
YLR190W	YLR190W ... MMR1 mitochondrion inheritance molecular function unknown mitochondrion* | YLR191W	yes	yes		0.471388	0.429081	0.547806		0.486793	0.607453	0.669717	0.391075		-0.952776	-0.699474	-1.48237	-0.938404		-0.75423	-0.932199	-0.927661	-0.585209		0.0156726	-0.179218	0.0793921		-0.708634	-0.41127	-0.253144		-0.409244	-0.204356	-0.307447		-0.228846	-0.306559	-0.351632	-0.548084	-0.288441	-0.172326		YLR190W	YLR190W ... MMR1 mitochondrion inheritance molecular function unknown mitochondrion* | YLR191W	0.525822	-0.085897	0.20155	0	0.118047
YFR034C	YFR034C ... PHO4 phosphate metabolism* transcription factor activity cytoplasm* | YFR035C	yes	yes		-0.861674	-0.904681	-0.811371		-1.09886	-0.406975	-0.443006	-0.204553		-0.649247	-0.941111	-2.46094	-0.959687		-0.110877	-0.62091	-0.47298	-1.25786		-0.14118	0.0655957	0.127474		-0.484292	-0.52765	-0.319102		-0.239591	-0.172654	-0.232251		-0.0928974	0.328046	-0.355894	-0.0766665	-0.412906	-0.228001		YFR034C	YFR034C ... PHO4 phosphate metabolism* transcription factor activity cytoplasm* | YFR035C	-0.014188	0.121648	-0.299382	0	-0.175598
YNR038W	YNR038W ... DBP6 35S primary transcript process ATP-dependent RNA helicase activitynucleolus* | YNR039C	yes	yes		-0.070829	0.099533	-0.062372		0.107034	0.180908	0.0885828	-0.214159		-0.747032	-0.505534	-1.13506	-0.952009		-0.516652	-1.26312	-0.581553	-0.597359		0.0146185	0.0848192	-0.0819152		-0.250335	-0.0770613	-0.258613		0.00988636	-0.010917	-0.0321119		-0.0552831	-0.191652	-0.591662	-0.621718	-0.331547	-0.382174		YNR038W	YNR038W ... DBP6 35S primary transcript process ATP-dependent RNA helicase activitynucleolus* | YNR039C	0.393015	0.396612	0.610724	0	-0.071542
YML116W	YML116W ... ATR1 multidrug transport multidrug efflux pump activity plasma membrane | YML117W	yes	yes		-0.243757	-0.3318	-0.136572		-0.0656894	0.0368481	0.180671	0.102881		-0.593712	-1.03841	-0.870049	-0.728612		-0.40562	0.00668918	-0.401934	-0.476289		-0.625025	-0.644096	-0.722861		-0.801027	-1.12003	-0.855519		-0.23147	-0.530927	-0.486301		-0.250802	-0.138885	-0.987826	-0.309774	-1.21817	-1.43644		YML116W	YML116W ... ATR1 multidrug transport multidrug efflux pump activity plasma membrane | YML117W	#N/A	#N/A	#N/A	#N/A	#N/A
YJL019W	YJL019W ... MPS3 mitotic sister chromatid cohes molecular function unknown integral to membrane* | YJL020C	yes	yes		-0.979711	-0.791531	-0.736562		0.104236	-0.485502	-0.480054	-0.668624		-0.387261	-0.337968	-1.08479	-0.953547		-0.312511	-0.627079	-0.561088	-0.090958		-0.198551	-0.157206	-0.164257		-0.972713	-0.196513	-0.279509		-0.0755582	-0.417458	-0.574555		-0.160377	-0.306622	0.678357	0.0400684	-0.305537	-0.457607		YJL019W	YJL019W ... MPS3 mitotic sister chromatid cohes molecular function unknown integral to membrane* | YJL020C	-0.568729	-0.283798	-0.613481	0	-0.050352
YLL021W	YLL021W ... SPA2 actin filament organization* cytoskeletal regulatory protein binbud neck* | YLL022C	yes	yes		0.039587	0.141352	0.050893		0.108846	0.00580369	0.142316	-0.0504799		-0.409546	-0.384443	-0.843303	-0.449076		-0.590853	-0.701686	-0.771553	-0.443916		0.0188527	-0.0297551	-0.0452921		-0.177129	-0.108763	-0.0364636		-0.085081	-0.0696667	-0.0725877		-0.0332716	0.0350689	-0.508132	-0.70508	-0.524082	-0.379907		YLL021W	YLL021W ... SPA2 actin filament organization* cytoskeletal regulatory protein binbud neck* | YLL022C	1.06918	1.02575	0.907457	0	0.159183
YML082W	YML082W PAC cluster YML082W sulfur metabolism carbon-sulfur lyase activity cytoplasm* | YML083C	yes	yes		-0.302609	-0.349608	-0.256104		0.277835	0.588351	0.0951193	0.104836		-0.75423	-0.242767	-0.761153	-0.540002		-0.277865	-1.41093	-0.889125	-0.694255		-0.143184	-0.0644637	-0.190168		-0.42937	-0.207175	-0.223635		-0.163084	-0.0836799	-0.0494784		-0.0586817	-0.11783	-0.504406	-0.40454	-0.209515	-0.159448		YML082W	YML082W PAC cluster YML082W sulfur metabolism carbon-sulfur lyase activity cytoplasm* | YML083C	0.034863	0.868848	0.290078	0	-0.258694
YJR104C	YJR104C iESR cluster SOD1 zinc ion homeostasis* "copper, zinc superoxide dismutase a"cytosol* | YJR105W	yes	yes		-0.583984	-0.632282	-0.361994		-0.331591	-0.355557	-0.37025	-0.25689		-0.402869	-0.622019	-0.666912	-0.618367		-0.416037	-0.613756	-0.466623	-0.618452		-0.112685	-0.0756869	-0.0551384		-0.506498	-0.234186	-0.222458		-0.25049	-0.253379	-0.325958		0.14215	0.177837	0.642995	0.92677	-0.216191	-0.274108		YJR104C	YJR104C iESR cluster SOD1 zinc ion homeostasis* "copper, zinc superoxide dismutase a"cytosol* | YJR105W	-0.917036	-1.02341	-0.258851	0	-1.47932
YML018C	YML018C PAC cluster YML018C biological process unknown molecular function unknown vacuolar membrane (sensu Fungi) | YML019W	yes	yes		-0.154818	-0.012888	0.235843		0.116157	0.0838864	0.0670493	0.337719		-0.289183	-0.285718	0.0103694	-0.0652525		-0.48313	-0.375066	-0.362222	-0.433302		0.244132	-0.243705	0.00319286		0.430298	-0.546599	-0.367594		-0.768948	-0.443054	-0.641988		-0.136493	-0.0525653	-0.411563	0.162348	-0.422236	-0.391558		YML018C	YML018C PAC cluster YML018C biological process unknown molecular function unknown vacuolar membrane (sensu Fungi) | YML019W	#N/A	#N/A	#N/A	#N/A	#N/A
YNL119W	YNL119W RP cluster NCS2 pseudohyphal growth* molecular function unknown cytoplasm | YNL120C	yes	yes		0.10818	0.239256	-0.343698		0.171914	-0.361532	0.702506	-0.849207		-1.50016	-0.434337	0.196783	-0.64322		-0.908121	-0.809944	-0.766336	-0.0435902		0.200178	-0.087887	-0.276198		0.302477	-0.00622274	-0.175809		-0.346888	0.0856675	-0.244524		-0.0817653	-0.561768	-0.381154	-1.71653	-0.114845	-0.396964		YNL119W	YNL119W RP cluster NCS2 pseudohyphal growth* molecular function unknown cytoplasm | YNL120C	0.16333	0.276064	0.303376	0	-0.044138
YGL095C	YGL095C ... VPS45 protein complex assembly* unfolded protein binding cytosol* | YGL096W	yes	yes		0.517117	0.131181	-0.070528		-0.440521	0.40458	0.223125	-0.496157		-1.80649	-0.623371	0.0292284	-0.0561866		0.322575	0.211536	0.135821	0.784682		0.124688	0.352209	0.201832		0.449379	0.700109	0.506735		0.627117	0.646333	0.646655		0.114383	-0.299137	0.125031	-0.512318	0.201107	0.232405		YGL095C	YGL095C ... VPS45 protein complex assembly* unfolded protein binding cytosol* | YGL096W	0.146537	0.456316	0.035187	0	0.182826
YGR079W	YGR079W ... YGR079W biological process unknown molecular function unknown cellular component unknown | YGR080W	yes	yes		-0.347864	-0.544533	-0.745464		-0.775341	-0.344459	-0.325162	-0.81279		-1.24375	-1.00278	-1.04805	-0.682676		-0.696852	-1.07213	-0.543585	-0.563757		0.185941	0.0151208	-0.0455292		0.286435	-0.294268	-0.113529		-0.0319697	-0.101574	-0.0976133		-0.0335907	0.119958	-0.406689	-0.0525808	0.0658479	-0.0251937		YGR079W	YGR079W ... YGR079W biological process unknown molecular function unknown cellular component unknown | YGR080W	#N/A	#N/A	#N/A	#N/A	#N/A
YGR087C	YGR087C ... PDC6 ethanol metabolism pyruvate decarboxylase activity cytoplasm | YGR088W	yes	yes			1.21164	0.8484					0.0888058		0.132113	0.961592		-0.143649					3.14608		0.242525	0.290809	0.993891			-0.112612	-0.0211969		3.72227	0.595707	0.00163691		-0.38061	1.03507	0.750636	0.821888	0.693624	0.879649		YGR087C	YGR087C ... PDC6 ethanol metabolism pyruvate decarboxylase activity cytoplasm | YGR088W	0.312004	0.009981	-1.23332	0	-0.039695
YNL066W	YNL066W PAC cluster SUN4 mitochondrion organization and glucosidase activity cell wall (sensu Fungi)* | YNL067W	yes	yes		-0.131307	0.268612	0.472737		0.397511	0.312169	0.369381	0.756794		0.119243	-0.0942301	0.331916	-0.0767821		-0.494916	-0.333428	-0.397091	-0.614911		-0.0110999	-0.0847574	-0.0424769		0.115046	-0.687082	-0.489893		-0.963478	-0.965447	-0.933547		-0.309883	-0.256567	-0.861478	-0.0505301	-0.437588	-0.582167		YNL066W	YNL066W PAC cluster SUN4 mitochondrion organization and glucosidase activity cell wall (sensu Fungi)* | YNL067W	-0.295133	0.05765	0.029755	0	0.518244
YNL300W	YNL300W Ö TOS6 biological process unknown molecular function unknown | Glycosylphosphatidylinositol-dependent cell wall protein, expression is periodic and decreases in respone to ergosterol perturbation or upon entry into stationary phase; depletion increases resistance to lactic acidYNL301C	yes	yes		-0.519892	-0.004366	0.183064		-0.148438	-0.219618	-0.344983	0.067219		1.06221	0.823208	0.534596	0.827496		0.781465	0.656374	0.774696	0.47629		0.328133	0.331451	0.16451		1.1046	0.784905	0.851568		0.428898	0.265166	0.418061		-0.191267	0.0115142	0.206152	0.130909	0.653987	0.694731		YNL300W	YNL300W Ö TOS6 biological process unknown molecular function unknown | Glycosylphosphatidylinositol-dependent cell wall protein, expression is periodic and decreases in respone to ergosterol perturbation or upon entry into stationary phase; depletion increases resistance to lactic acidYNL301C	#N/A	#N/A	#N/A	#N/A	#N/A
YLR177W	YLR177W ... YLR177W biological process unknown molecular function unknown cytoplasm | YLR178C	yes	yes		0.069961	0.188743	0.585366		0.0386473	1.26852	0.22536	0.145389		-0.178227	0.639664	-0.759018	-0.539578		0.810108	0.560006	0.64423	0.993704		0.231955	0.294084	0.249148		-1.19862	0.172117	0.416924		0.21116	0.289119	0.356968		-0.0586817	-0.015855	-0.383665	-0.63546	0.337907	0.36218		YLR177W	YLR177W ... YLR177W biological process unknown molecular function unknown cytoplasm | YLR178C	#N/A	#N/A	#N/A	#N/A	#N/A
YDR161W	YDR161W PAC cluster YDR161W biological process unknown molecular function unknown cytoplasm* | YDR162C	yes	yes		0.712306	0.532452	0.191133		0.453685	0.785309	0.450642	-0.267104		-1.80077	-0.0384082	-0.567288	-0.545122		-0.820658	-1.23432	-0.811149	-0.0416213		-0.0529312	0.104931	-0.0914162		-0.370048	-0.105326	-0.0991994		0.0100762	0.042008	0.01983		0.182694	-0.0480128	-0.453123	-0.784291	-0.300021	-0.246019		YDR161W	YDR161W PAC cluster YDR161W biological process unknown molecular function unknown cytoplasm* | YDR162C	0.351313	0.205302	0.480306	0	-0.456541
YMR144W	YMR144W ... YMR144W biological process unknown molecular function unknown nucleus | YMR145C	yes	yes		0.181345	-0.163205	-0.257395		-0.887352	-0.624566	-0.232746	-1.16899		-1.11581	0.340103	-0.267165	-0.310299		0.272452	-0.961947	0.444443	0.68665		-0.367529	0.21394	-0.145512		0.456469	1.11366	0.472343		0.889384	0.699543	0.621033		-0.208924	0.123296	0.252825	0.197397	0.789043	0.760686		YMR144W	YMR144W ... YMR144W biological process unknown molecular function unknown nucleus | YMR145C	-0.249576	-0.47737	-0.453869	0	-0.092707
YLR383W	YLR383W ... SMC6 DNA repair* molecular function unknown nucleus* | YLR384C	yes	yes		1.2321	0.764577	0.790773		0.881922	0.715977	1.68222	0.395467		-0.785425	0.750088	-0.0220521	0.131985		0.268504	-0.439994	0.0413778	0.86677		0.180832	0.0132747	0.0541916		0.238682	0.68822	0.806126		0.67963	0.735629	0.892123		-0.0716791	-0.289203	-0.123474	-0.274973	0.219652	0.150358		YLR383W	YLR383W ... SMC6 DNA repair* molecular function unknown nucleus* | YLR384C	0.156331	0.700831	0.190274	0	-0.754661
YML081W	YML081W ... YML081W biological process unknown molecular function unknown nucleus | YML082W	yes	yes		-0.183165	-0.076788	-0.197168		-0.146495	0.155597	0.26827	-0.191627		-0.671298	-0.0384082	-0.429476	-0.424082		-0.209985	-0.804846	-0.571995	-0.230121		-0.0439637	0.0846961	-0.0219919		-0.117302	-0.19094	-0.305448		-0.0379536	-0.0486931	-0.0180162		-0.0472641	-0.112925	-0.400579	-0.580302	-0.170843	-0.112996		YML081W	YML081W ... YML081W biological process unknown molecular function unknown nucleus | YML082W	-0.249101	-0.120112	-0.351179	0	-0.24413
YCL011C	YCL011C ... GBP2 telomere maintenance* RNA binding* nucleus | YCL012C	yes	.		-0.222698	-0.379481	-0.300546		-0.0813133	0.165641	0.099008	-0.230016		-0.778619	-0.585896	-0.947284	-0.555374		-0.436526	-0.594738	-0.57978	-0.376776		-0.245538	-0.041869	-0.203477		-0.139141	0.101068	-0.00190922		0.0425006	-0.0851024	0.208681		-0.309191	-0.0750588	-0.746633	-0.897799	-0.407223	-0.153252		YCL011C	YCL011C ... GBP2 telomere maintenance* RNA binding* nucleus | YCL012C	0.313639	0.161751	0.112535	0	0.057298
YGR155W	YGR155W ... CYS4 cysteine biosynthesis cystathionine beta-synthase activitcytoplasm* | YGR156W	yes	.		-0.032897	-0.134132	-0.030423		-0.0659258	-0.154423	-0.0810424	-0.33067		-0.564785	-0.482522	-0.691922	-0.530041		-0.564292	-0.635356	-0.530589	-0.373683		0.0127436	0.0678236	-0.143094		-0.162653	-0.118418	-0.158182		0.0446035	-0.168498	-0.00877594		-0.0784199	-0.159166	-0.519434	-0.59071	-0.482304	-0.412767		YGR155W	YGR155W ... CYS4 cysteine biosynthesis cystathionine beta-synthase activitcytoplasm* | YGR156W	0.032254	-0.093105	-0.124447	0	-0.12905
YHR084W	YHR084W ... STE12 pseudohyphal growth* transcription factor activity nucleus | YHR085W	yes	.		-0.136318	0.183719	-0.278415		-0.0161452	-0.186229	-0.108042	-0.585491		-0.789413	-0.540909	-0.429672	-0.797978		-0.580207	-0.502854	-0.660566	-0.0688664		0.799681	0.74202	0.682962		-0.342174	0.0303459	-0.160173		-0.0679058	0.0341083	0.00163691		0.37063	0.304048	-0.101465	0.0553784	0.183857	0.229163		YHR084W	YHR084W ... STE12 pseudohyphal growth* transcription factor activity nucleus | YHR085W	-0.081272	-0.223046	-0.210967	0	-0.173226
YER045C	YER045C ... ACA1 transcription initiation from specific RNA polymerase II transcrinucleus | YER046W	yes	.		1.16481	1.04392	1.10916		0.977247	0.179513	0.979693	1.11117		-0.130921	-0.0384082	0.704266	-0.143649		0.29321	1.19333	0.32445	0.364721		0.564453	0.21019	0.0907527		0.899412	0.451289	0.495379		0.204426	0.593336	0.689047		0.124182	0.254514	0.600076	0.447493	1.37314	1.49231		YER045C	YER045C ... ACA1 transcription initiation from specific RNA polymerase II transcrinucleus | YER046W	#N/A	#N/A	#N/A	#N/A	#N/A
YML113W	YML113W ... DAT1 negative regulation of transcr AT DNA binding nucleus | YML114C	yes	.		0.14007	0.178853	-0.401772		0.076122	-0.039604	-0.000536345	-0.182155		-1.94589	-0.775374	-0.808184	-1.37928		-1.36909	-0.739554	-0.521432	-1.30148		-0.258243	0.158843	-0.348341		0.4469	-0.0826589	-0.123295		0.2071	-0.0923491	0.379274		0.0164197	-0.0364843	-0.119557	-0.739991	-0.165429	-0.274572		YML113W	YML113W ... DAT1 negative regulation of transcr AT DNA binding nucleus | YML114C	-0.080702	-0.534448	0.442245	0	-0.745389
YML046W	YML046W ... PRP39 nuclear mRNA splicing, via spl RNA binding commitment complex* | YML047C	yes	.		-0.129725	-0.076725	-0.229427		-0.295772	-0.427183	0.0518424	-0.714605		-0.988902	-0.585896	-0.502185	-0.612325		-0.514145	-0.862937	-0.537201	-0.0230087		-0.0442583	0.0340333	-0.325119		-0.212797	0.238295	-0.234854		-0.263261	0.0398907	0.07272		-0.266277	-0.521523	-0.527349	-1.04921	-0.462732	-0.628883		YML046W	YML046W ... PRP39 nuclear mRNA splicing, via spl RNA binding commitment complex* | YML047C	-0.228261	-0.0228	-0.167542	0	0.13238
YDL233W	YDL233W ... YDL233W biological process unknown molecular function unknown cytoplasm* | YDL234C	yes	.		-0.274477	-0.474248	-0.028218		-0.408812	-0.209529	-0.103311	-0.262667		-0.774777	-1.62337	-0.887751	-0.308709		0.797913	-0.0874775	-0.261185	0.711312		-0.0237554	0.110236	-0.0526515		-0.991359	0.30772	0.616233		0.74986	0.616171	0.965717		0.283424	0.00227899	0.352805	1.42297	1.25812	0.926357		YDL233W	YDL233W ... YDL233W biological process unknown molecular function unknown cytoplasm* | YDL234C	#N/A	#N/A	#N/A	#N/A	#N/A
YEL016C	YEL016C ... NPP2 biological process unknown molecular function unknown cellular component unknown | YEL017C-A	yes	.		-0.334459	-0.454132	-0.832777		-0.266207	-0.577119	-0.420175	-0.0322096		0.199227	-0.785642	-1.55995	-0.586593		-0.0780456	-1.01966	-0.573448	-0.40646		0.356481	-0.356402	0.0177379		0.0315158	-0.367869	0.116307		-0.366494	-0.603965	-0.0464574		-0.215186	-0.0447844	-0.81646	-0.2232	-0.114481	-0.0936482		YEL016C	YEL016C ... NPP2 biological process unknown molecular function unknown cellular component unknown | YEL017C-A	#N/A	#N/A	#N/A	#N/A	#N/A
YPL186C	YPL186C iESR cluster UIP4 biological process unknown molecular function unknown endoplasmic reticulum* | YPL187W	yes	.		2.18238	0.726216	0.626008		1.03865	-0.109993		-1.23312		1.13211			-1.46558		-0.990583		2.90387	2.00858		1.24252	-0.446157	-0.00610888		3.89941	-0.43454	0.786158		2.37435	0.595707	0.586599		0.471833	0.150546	2.05464	1.40685	2.29041	1.61145		YPL186C	YPL186C iESR cluster UIP4 biological process unknown molecular function unknown endoplasmic reticulum* | YPL187W	#N/A	#N/A	#N/A	#N/A	#N/A
YLR285C-A	YLR285C-A ... YLR285C-A biological process unknown molecular function unknown cellular component unknown | YLR285W	yes	.		1.44541	1.47468	1.43336		4.20857	3.89001	3.01441	1.61237		2.13211	1.54655	2.4698	-0.143649		-0.460068	-0.569629	-1.40279	-0.0820249		0.948794	0.138806	-0.84261		0.651485	-0.212148	0.0353867		-2.03928	-0.29411	0.00163691		-0.571633	-1.29092	-0.203403	0.603543	0.787679	0.106336		YLR285C-A	YLR285C-A ... YLR285C-A biological process unknown molecular function unknown cellular component unknown | YLR285W	#N/A	#N/A	#N/A	#N/A	#N/A
YNR053C	YNR053C PAC cluster NOG2 ribosome assembly* GTPase activity nucleus* | YNR054C	yes	.		-0.050962	-0.147708	-0.190984		0.00852731	0.0197746	0.143512	-0.664899		-0.916385	-0.447799	-1.49416	-0.74332		-0.419894	-1.03079	-0.631951	-0.259225		0.0338988	0.030419	-0.0290093		-0.417228	-0.223776	-0.333604		-0.0984062	-0.0955612	-0.0638294		-0.00787117	-0.106684	-0.511804	-1.4396	-0.538245	-0.291585		YNR053C	YNR053C PAC cluster NOG2 ribosome assembly* GTPase activity nucleus* | YNR054C	0.13103	0.293786	-0.033704	0	0.016311
YDR465C	YDR465C PAC cluster RMT2 peptidyl-arginine methylation protein-arginine N-methyltransferascytoplasm* | YDR466W	yes	.		0.299557	0.021178	-0.055682		0.363374	-0.128609	0.507314	-0.249996		-1.30646	-0.651385	-0.818444	-0.46438		-0.494015	-0.391631	-0.910712	-0.15832		0.109453	0.363198	0.0994369		-0.0588252	-0.140901	-0.324764		-0.0329297	-0.229745	-0.103909		0.290554	0.0587202	-0.212073	0.07295	-0.127066	-0.332348		YDR465C	YDR465C PAC cluster RMT2 peptidyl-arginine methylation protein-arginine N-methyltransferascytoplasm* | YDR466W	0.120996	0.339775	0.158143	0	-0.223931
YPL168W	YPL168W ... YPL168W biological process unknown molecular function unknown mitochondrion | YPL169C	yes	.		0.011828	-0.062532	-0.502507		-0.183745	-0.109993	0.182291	-0.940941		-0.675242	-0.453446	-0.852127	-0.851469		0.746383	-1.15459	-0.385632	0.423615		-0.264435	0.00409527	-0.295615		0.466453	0.72791	0.728825		0.816739	1.00195	1.13549		-0.210685	-0.44251	0.811665	-0.204584	0.211755	0.255275		YPL168W	YPL168W ... YPL168W biological process unknown molecular function unknown mitochondrion | YPL169C	#N/A	#N/A	#N/A	#N/A	#N/A
YDR422C	YDR422C ... SIP1 protein amino acid phosphoryla AMP-activated protein kinase activivacuole | YDR423C	yes	.		-0.190929	-0.13137	0.019657		-0.121133	-0.0544982	-0.0706896	-0.143297		-0.518302	-0.407053	-0.230639	-0.473415		-0.293146	-0.258021	-0.558692	-0.212067		0.173812	0.0785181	-0.0562946		-0.789887	0.0217839	-0.11458		-0.0968582	0.0176156	-0.0592086		-0.185081	-0.264491	-0.494464	-0.330115	-0.0470033	0.0407141		YDR422C	YDR422C ... SIP1 protein amino acid phosphoryla AMP-activated protein kinase activivacuole | YDR423C	-0.241833	-0.190892	-0.368619	0	-0.245938
YDR150W	YDR150W ... NUM1 nuclear migration, microtubule tubulin binding mitochondrion* | YDR151C	yes	.		-0.804747	-0.549979	-0.850615		-0.638837	-0.561868	-0.547931	-0.637818		-0.930949	-0.566904	-0.985768	-0.588594		-0.630626	-0.92511	-0.70956	-0.464082		0.0143739	-0.0205079	-0.00276156		0.0386701	0.207992	0.135824		0.197211	0.23499	0.22856		0.0474838	-0.109721	-0.0610976	-0.385397	0.0161344	0.118856		YDR150W	YDR150W ... NUM1 nuclear migration, microtubule tubulin binding mitochondrion* | YDR151C	0.080785	0.007407	-0.140644	0	0.311374
YJL125C	YJL125C PAC cluster GCD14 tRNA methylation tRNA methyltransferase activity nucleus | YJL126W	yes	.		0.251451	0.188212	-0.259768		-0.0438149	-0.308539	0.184394	-0.301984		-0.545959	-1.21349	-0.269739	-0.558687		0.0304788	-0.716095	-0.534699	-0.345772		-0.0439981	0.100477	-0.00610888		-0.183577	-0.0337567	0.041997		0.118452	-0.175122	-0.047644		-0.262215	-0.0827676	0.498408	0.155889	-0.296766	-0.209655		YJL125C	YJL125C PAC cluster GCD14 tRNA methylation tRNA methyltransferase activity nucleus | YJL126W	-0.078145	0.064689	0.400106	0	-0.070665
YKL068W	YKL068W ... NUP100 mRNA-nucleus export* structural molecule activity nuclear pore | YKL068W-A	yes	.		-0.276078	-0.230412	-0.311687		-0.0804639	-0.163681	-0.0224243	-0.284336		-0.595807	-0.297495	-0.561315	-0.604576		-0.692501	-0.494869	-0.582413	-0.228167		0.00781902	-0.0258386	-0.165685		-0.0883787	-0.0466694	-0.0728253		0.0816345	0.00992561	-0.0128992		-0.151877	-0.0885305	-0.665023	-0.757012	-0.581928	-0.532354		YKL068W	YKL068W ... NUP100 mRNA-nucleus export* structural molecule activity nuclear pore | YKL068W-A	0.030775	-0.028908	-0.063443	0	0.063795
YLR189C	YLR189C ... ATG26 sterol metabolism sterol 3-beta-glucosyltransferase acytoplasm | YLR190W	yes	.		0.889041	0.723144	0.697458		0.800956	0.585152	0.933366	0.600187		-0.849739	-0.287768	-0.280221	-0.405091		-0.137809	0.111582	0.136759	0.36542		-0.0124046	0.163668	0.065514		-0.375866	0.487027	0.383001		0.55408	0.544045	0.703657		-0.164754	-0.0506609	-0.203434	-0.41912	-0.0589831	0.156489		YLR189C	YLR189C ... ATG26 sterol metabolism sterol 3-beta-glucosyltransferase acytoplasm | YLR190W	0.739456	0.560835	0.413416	0	0.217328
YCL036W	YCL036W ... GFD2 biological process unknown molecular function unknown cellular component unknown | YCL037C	yes	.		0.376714	-0.164505	-0.329652		0.0617309	0.137934	-0.0688691	-0.0930325		-1.01473	-0.669174	-0.404668	-0.584222		-1.16051	-1.04888	-0.53501	-0.572085		0.254547	0.126216	-0.0440767		0.16847	-0.279122	-0.151847		0.211483	0.129691	0.19348		0.520022	0.152252	-0.457257	-0.2232	0.0706932	-0.0866617		YCL036W	YCL036W ... GFD2 biological process unknown molecular function unknown cellular component unknown | YCL037C	-0.065513	-0.280792	0.149115	0	-0.740101
YOR355W	YOR355W ... GDS1 aerobic respiration molecular function unknown cytoplasm* | YOR356W	yes	.		-0.771795	-0.932163	-0.613943		-0.862461	-0.868631	-0.76819	-0.843807		-0.801826	-0.603913	-0.750529	-0.688314		-0.353668	-0.496149	-0.281601	-0.231286		0.0380224	-0.0125072	-0.129827		-0.477557	-0.0222839	-0.365603		-0.263285	-0.0333417	-0.159204		-0.105008	-0.321376	-0.242178	-0.823099	0.811281	0.733234		YOR355W	YOR355W ... GDS1 aerobic respiration molecular function unknown cytoplasm* | YOR356W	-0.592567	-0.743278	-0.937449	0	-0.257529
YPL256C	YPL256C ... CLN2 regulation of cyclin dependent cyclin-dependent protein kinase regcytoplasm* | YPL257W	yes	.		-0.040011	-0.295674	-0.281418		-0.783207	-0.646593	-0.178388	-0.53077		-0.353314	0.0257221	-0.332862	-0.109847		0.357341	0.195595	0.33663	0.16249		0.323229	0.115022	0.0479985		0.516943	0.441588	0.331641		0.336482	0.449891	0.580687		0.0295579	0.17135	0.60725	0.51394	0.288283	0.376276		YPL256C	YPL256C ... CLN2 regulation of cyclin dependent cyclin-dependent protein kinase regcytoplasm* | YPL257W	#N/A	#N/A	#N/A	#N/A	#N/A
YKR028W	YKR028W ... SAP190 G1/S transition of mitotic cel protein serine/threonine phosphatascytoplasm | YKR029C	yes	.		0.15194	-0.077615	-0.110644		-0.29166	-0.274031	0.0301409	-0.392994		-0.965832	-0.599966	-0.837628	-0.697671		-0.225872	-0.562096	-0.466075	-0.161066		-0.00723734	-0.00437759	-0.0901079		-0.249335	0.00869421	0.0316785		-0.0169583	-0.105045	0.136937		-0.169653	-0.221706	-0.302308	-0.531749	-0.171017	-0.144155		YKR028W	YKR028W ... SAP190 G1/S transition of mitotic cel protein serine/threonine phosphatascytoplasm | YKR029C	-0.06945	0.026209	-0.218614	0	0.081183
YNL299W	YNL299W PAC cluster TRF5 sister chromatid cohesion* DNA-directed DNA polymerase activitnucleus | YNL300W	yes	.		0.315913	0.255364	-0.134882		1.07818	0.141545	0.393937	-0.174229		-1.03781	-0.182798	-0.600588	-0.37106		-0.807719	-0.682971	-1.03024	-0.225888		0.224301	0.365955	-0.0665447		0.753433	0.310741	0.343016		-0.115975	-0.086612	0.274921		0.263246	0.247918	0.0937804	-0.615517	0.128561	-0.20524		YNL299W	YNL299W PAC cluster TRF5 sister chromatid cohesion* DNA-directed DNA polymerase activitnucleus | YNL300W	0.560281	0.177967	0.003946	0	-0.28435
YOR262W	YOR262W ... YOR262W biological process unknown molecular function unknown cytoplasm | YOR263C	yes	.		-0.04619	0.141779	-0.107108		-0.337501	-0.310292	0.0541863	-0.024576		-0.75423	-0.886405	-0.980232	-0.724424		-0.223244	-0.339947	-0.183003	-0.268681		0.242525	0.312563	0.0878673		-1.12296	-0.112612	-0.12918		-0.170811	-0.182502	-0.0716798		0.0796464	0.15834	-0.0352046	0.257104	1.06413	0.98729		YOR262W	YOR262W ... YOR262W biological process unknown molecular function unknown cytoplasm | YOR263C	-0.345805	0.561962	-0.628563	0	-0.590606
YGR023W	YGR023W iESR cluster MTL1 cell wall organization and bio molecular function unknown integral to plasma membrane | YGR024C	yes	.		1.23301	0.369185	2.08106		-0.961353	-0.431921	-0.0807432	-0.413694		1.13211	1.22463	-0.115161	0.228319		1.59438	1.0678	1.48884	0.271612		-0.857011	0.223694	-0.384621		0.992522	0.820274	0.863326		0.808004	-0.318563	0.927636		-1.28107	-0.0852253	0.795724	-0.652043	1.59286	1.27079		YGR023W	YGR023W iESR cluster MTL1 cell wall organization and bio molecular function unknown integral to plasma membrane | YGR024C	#N/A	#N/A	#N/A	#N/A	#N/A
YGL119W	YGL119W ... ABC1 ubiquinone biosynthesis molecular function unknown mitochondrion | YGL120C	yes	.		0.372391	-0.070021	0.068408		0.486106	0.330579	0.36361	0.0179224		-0.239856	-0.145323	-1.4844	-1.08555		-0.197034	-0.402519	-0.544716	-0.561927		-0.158299	-0.194618	-0.120065		-0.588874	0.0452676	-0.406114		0.0150832	-0.0100142	-0.0182626		0.0661247	-0.60124	-0.0886962	-1.3607	-0.145709	-0.0659032		YGL119W	YGL119W ... ABC1 ubiquinone biosynthesis molecular function unknown mitochondrion | YGL120C	0.1487	0.10484	0.348843	0	0.009354
YKL081W	YKL081W RP cluster TEF4 translational elongation translation elongation factor activmitochondrion* | YKL082C	yes	.		-0.499658	-0.250244	0.001534		-0.0643989	-0.181513	-0.199829	0.0351595		0.127504	-0.155032	-0.287475	-0.144245		-0.169252	-0.159765	-0.192382	-0.325676		0.0490238	-0.0257215	-0.0338863		-0.232312	-0.217134	-0.224656		-0.34535	-0.350537	-0.31061		-0.0270825	-0.0237977	-0.765157	-0.880961	-0.754549	-0.727263		YKL081W	YKL081W RP cluster TEF4 translational elongation translation elongation factor activmitochondrion* | YKL082C	-0.266136	-0.128823	0.007762	0	-0.297743
YKR043C	YKR043C PAC cluster YKR043C biological process unknown molecular function unknown cytoplasm* | YKR044W	yes	.		0.363682	0.003356	0.021048		-0.0313624	-0.0799361	0.142537	-0.157632		-0.696275	-0.750283	-0.45204	-0.606364		-0.0641639	-0.385271	-0.301935	-0.26331		-0.000442247	0.0804616	-0.0852598		0.262166	-0.0502039	-0.226781		-0.114787	-0.0123393	-0.0842145		-0.218135	-0.00376372	-0.458022	-0.215431	-0.294746	-0.258318		YKR043C	YKR043C PAC cluster YKR043C biological process unknown molecular function unknown cytoplasm* | YKR044W	0.025174	0.084871	0.114162	0	-0.238575
YBR043C	YBR043C ... QDR3 multidrug transport multidrug efflux pump activity plasma membrane* | YBR044C	yes	.		-0.414756	-0.56035	-0.285031		-0.101077	-0.162461	-0.353762	-0.111132		-0.680801	-0.523835	-0.973142	-0.57576		-0.0403358	-0.102124	-0.209783	-0.139099		-0.604152	-0.31456	-0.510678		-1.17164	-0.588346	-0.641732		-0.295648	-0.409587	-0.133523		-0.113129	0.030467	-0.195625	0.156624	-0.136671	0.0136875		YBR043C	YBR043C ... QDR3 multidrug transport multidrug efflux pump activity plasma membrane* | YBR044C	#N/A	#N/A	#N/A	#N/A	#N/A
YDR188W	YDR188W ... CCT6 protein folding* unfolded protein binding cytoplasm* | YDR189W	yes	.		-0.06959	-0.355653	-0.158459		-0.0315707	0.227923	-0.0137724	0.0307029		-0.530281	-0.327915	-0.379531	-0.313235		-0.338833	-0.452179	-0.392909	-0.255247		-0.0239793	0.0567384	0.0888164		-0.303277	-0.105913	-0.109228		0.018075	-0.0440754	-0.101488		-0.0277612	-0.0451283	-0.388675	-0.52612	-0.366799	-0.34745		YDR188W	YDR188W ... CCT6 protein folding* unfolded protein binding cytoplasm* | YDR189W	-0.045619	-0.094134	-0.027972	0	-0.226118
YIL126W	YIL126W ... STH1 meiosis* ATPase activity* RSC complex | YIL127C	yes	.		-0.212905	-0.352258	-0.492856		-0.290417	-0.347857	0.0669493	-0.415041		-1.08239	-0.682264	-1.1107	-0.758527		-0.378065	-1.09244	-0.795466	-0.568772		-0.0472979	0.0639124	-0.0630359		-0.246076	0.216493	-0.0233453		0.111759	0.180618	0.0766979		-0.0739927	-0.207472	-0.307117	-0.362058	-0.247298	-0.249963		YIL126W	YIL126W ... STH1 meiosis* ATPase activity* RSC complex | YIL127C	0.098457	-0.044058	-0.065434	0	0.183071
YOL103W	YOL103W ... ITR2 myo-inositol transport myo-inositol transporter activity membrane | YOL104C	yes	.		-0.24542	-0.25827	-0.156414		-0.316448	-0.232199	-0.0886795	-0.0780332		-0.778882	-0.594371	-0.633292	-0.483451		-0.103965	-0.205977	-0.328787	-0.187242		0.0612844	0.031507	-0.0110751		-0.270513	-0.0830173	-0.223079		-0.19357	-0.081279	-0.18675		-0.121146	-0.168259	-0.118917	-0.469878	0.783163	0.73793		YOL103W	YOL103W ... ITR2 myo-inositol transport myo-inositol transporter activity membrane | YOL104C	-0.257579	-0.095845	-0.878814	0	-0.321638
YFR018C	YFR018C ... YFR018C biological process unknown molecular function unknown cellular component unknown | YFR019W	yes	.		-0.788473	-0.630565	0.331824		-0.618465	0.0550659	-0.575181	0.102745		0.233993	0.617637	-0.0195838	-0.0619656		0.923687	0.477257	0.562837	0.352532		0.511341	0.823777	0.399148		0.846301	0.868109	0.57025		0.298969	0.21984	0.232417		0.201185	0.683141	0.368957	1.09369	0.608926	0.598913		YFR018C	YFR018C ... YFR018C biological process unknown molecular function unknown cellular component unknown | YFR019W	#N/A	#N/A	#N/A	#N/A	#N/A
YJL194W	YJL194W ... CDC6 pre-replicative complex format protein binding* pre-replicative complex | YJL195C	yes	.		-0.736788	-0.775418	-0.574054		-0.370465	-0.667989	-0.207819	-1.16081		-0.815419	0.187868	-0.663224	-0.563188		-0.336358	-0.450048	-0.749475	0.172076		0.0763324	0.313176	-0.146707		0.306955	-0.153254	0.292464		-0.101955	-0.249123	0.172824		-0.159286	-0.264917	0.672126	0.607763	0.154036	-0.037494		YJL194W	YJL194W ... CDC6 pre-replicative complex format protein binding* pre-replicative complex | YJL195C	#N/A	#N/A	#N/A	#N/A	#N/A
YJR147W	YJR147W ... HMS2 pseudohyphal growth molecular function unknown cytoplasm* | YJR148W	yes	.		0.469664	0.305765	0.459629		0.360575	0.231044	0.170319	0.223735		0.132113	-0.552981	0.884839	0.0419063		0.0094172	-0.595164	0.000735776	-0.166509		0.605095	0.34392	0.449086		0.632626	-0.13686	0.433998		-0.585155	-0.0168319	-0.278471		0.171616	0.382453	0.246593	1.27237	-0.462496	-0.452567		YJR147W	YJR147W ... HMS2 pseudohyphal growth molecular function unknown cytoplasm* | YJR148W	#N/A	#N/A	#N/A	#N/A	#N/A
YJL116C	YJL116C ... NCA3 mitochondrion organization and molecular function unknown cellular component unknown | YJL117W	yes	.		0.097492	0.282033	-0.10269		-1.69832	-1.33239	-1.59907	-0.773691		-3.18981	-2.84576		-1.88061		3.37865	3.84541	3.76186	2.89964		0.316525	0.460734	-0.269143		0.236447	-2.335	-2.60616		-2.23708	-1.28204	-1.80572		0.240879	0.687146	2.40187	3.09135	0.430589	0.0787204		YJL116C	YJL116C ... NCA3 mitochondrion organization and molecular function unknown cellular component unknown | YJL117W	#N/A	#N/A	#N/A	#N/A	#N/A
YLR399C	YLR399C ... BDF1 DNA repair* transcription regulator activity nucleus* | YLR400W	yes	.		0.458293	0.189434	0.134395		0.279655	0.329919	0.542652	0.167177		-0.898475	-1.02592	-1.43709	-0.472598		-0.115338	-0.517162	-0.41728	-0.201705		-0.37736	-0.198338	-0.166574		-0.703312	-0.122969	-0.0798341		0.0535431	0.0607709	0.00392872		-0.382655	-0.394005	-0.836372	-1.11372	-0.384278	-0.291292		YLR399C	YLR399C ... BDF1 DNA repair* transcription regulator activity nucleus* | YLR400W	0.615176	0.321511	0.124031	0	-0.007326
YDL046W	YDL046W ... NPC2 biological process unknown molecular function unknown vacuole (sensu Fungi) | YDL047W	yes	.		-0.32468	-0.128281	0.258331		-0.272939	-0.263734	-0.324639	0.0508879		0.536734	0.509628	0.141681	0.464209		0.289525	0.32835	0.327863	0.312645		0.223666	0.228032	0.196411		0.802551	0.536587	0.58995		0.522206	0.421419	0.495195		-0.0605566	0.155978	-0.278808	-0.559703	0.73467	0.69183		YDL046W	YDL046W ... NPC2 biological process unknown molecular function unknown vacuole (sensu Fungi) | YDL047W	-1.08284	-1.04657	-0.52298	0	-1.01377
YNL080C	YNL080C Ö EOS1 biological process unknown molecular function unknown | Protein involved in N-glycosylation; deletion mutation confers sensitivity to exidative stress and shows synthetic lethality with mutations in the spindle checkpoint genes BUB3 and MAD1; YNL080C is not an essential geneYNL081C	yes	.		-0.147849	-0.08961	-0.096633		-0.0608884	-0.0502871	-0.126033	0.254443		-0.291695	-0.0901232	-0.540979	-0.0049788		-0.257369	0.0953865	-0.145313	-0.286878		-0.0198614	-0.127942	0.0827599		-0.576321	-0.477834	-0.351118		-0.219477	-0.467265	-0.392321		0.0927073	0.00668713	-0.0973611	-0.368083	0.0828518	0.0575816		YNL080C	YNL080C Ö EOS1 biological process unknown molecular function unknown | Protein involved in N-glycosylation; deletion mutation confers sensitivity to exidative stress and shows synthetic lethality with mutations in the spindle checkpoint genes BUB3 and MAD1; YNL080C is not an essential geneYNL081C	#N/A	#N/A	#N/A	#N/A	#N/A
YFR037C	YFR037C ... RSC8 chromatin remodeling molecular function unknown nucleus* | YFR038W	yes	.		0.219913	-0.168736	-0.425405		-0.0734631	0.0289831	-0.26837	-0.381899		-0.994644	-0.631499	-1.47271	-0.549906		-0.298011	-0.521374	-0.316091	-0.443549		-0.218231	0.0861127	0.111869		-0.236504	-0.00022867	0.106743		-0.00707848	0.00486962	-0.0806293		-0.442989	0.0676234	-0.896705	-0.113721	-0.461119	-0.178817		YFR037C	YFR037C ... RSC8 chromatin remodeling molecular function unknown nucleus* | YFR038W	-0.038715	0.109201	-0.063314	0	-0.042244
YOR246C	YOR246C ... YOR246C biological process unknown oxidoreductase activity lipid particle | YOR247W	yes	.		-0.224223	-0.428025	0.001135		0.283185	-0.152304	-0.0347637	-0.16628		0.0174015	-0.385574	-0.072457	-0.154316		-0.281814	-0.0657825	-0.292046	-0.129053		-0.0227395	0.0354628	0.145894		0.240156	-0.0409996	-0.0867852		-0.221915	-0.265211	-0.262841		-0.189926	-0.0247123	-0.625941	-0.630904	0.661915	0.657922		YOR246C	YOR246C ... YOR246C biological process unknown oxidoreductase activity lipid particle | YOR247W	-0.373651	-0.128839	-0.093314	0	-0.304484
YPR169W	YPR169W PAC cluster JIP5 protein monoubiquitination molecular function unknown nucleus* | YPR170C	yes	.		0.12226	0.083946	-0.216988		0.0633094	-0.29586	0.52931	-0.627401		-1.47794	-0.568923	-0.363089	-0.673235		-0.186725	-0.739554	-0.866644	0.0167982		0.167283	0.0845403	0.0783515		0.151056	0.098892	0.096816		0.00578539	0.00878762	0.00728348		0.152306	0.0438569	0.774007	0.637197	-0.204459	-0.0320242		YPR169W	YPR169W PAC cluster JIP5 protein monoubiquitination molecular function unknown nucleus* | YPR170C	0.073111	0.153844	0.113646	0	-0.086709
YNL148C	YNL148C ... ALF1 post-chaperonin tubulin foldin microtubule binding* cytoplasm* | YNL149C	yes	.		-0.34204	-0.478017	-0.78903		-0.624318	-0.788065	0.182291	-0.56724		-0.308459	-1.45345	-2.17406	-0.352236		-0.253617	0.52348	-0.970595	-0.228462		0.1028	-0.18435	0.557792		-2.12296	-0.405394	-0.637868		-0.239804	0.256131	-0.278471		0.655916	0.157059	0.475218	0.226279	0.560224	-0.144804		YNL148C	YNL148C ... ALF1 post-chaperonin tubulin foldin microtubule binding* cytoplasm* | YNL149C	-0.392018	-0.518259	-0.161308	0	-0.19115
YLR007W	YLR007W ... NSE1 DNA repair* molecular function unknown nucleus* | YLR008C	yes	.		0.96832	1.05873	0.942946		0.971533	0.916479	1.42008	-0.119302		-0.664353	-0.269734	-0.316795	-0.402384		0.298924	-0.128597	0.290423	0.942411		-0.00745355	0.19484	0.430624		0.176946	0.604216	0.784075		0.460353	0.440429	0.361812		-0.341989	-0.0119286	-0.450377	-0.971661	-0.384241	-0.473328		YLR007W	YLR007W ... NSE1 DNA repair* molecular function unknown nucleus* | YLR008C	#N/A	#N/A	#N/A	#N/A	#N/A
YOR216C	YOR216C ... RUD3 ER to Golgi transport molecular function unknown Golgi apparatus | YOR217W	yes	.		0.113259	0.085613	-0.321525		-0.718082	-0.0485928	-0.17153	-0.878528		-1.39513	0.392226	-0.249017	-0.270182		0.473364	-0.739554	0.173963	0.362027		-0.141988	-0.232032	0.155172		0.241881	0.0915286	0.775035		0.792615	0.691922	0.74828		0.18334	0.107445	-0.151049	0.234604	1.23826	1.12132		YOR216C	YOR216C ... RUD3 ER to Golgi transport molecular function unknown Golgi apparatus | YOR217W	-0.230764	-0.170931	-0.095159	0	-0.104724
YLR056W	YLR056W ... ERG3 ergosterol biosynthesis C-5 sterol desaturase activity endoplasmic reticulum | YLR057W	yes	.		0.776407	1.02852	1.24779		1.44169	1.45195	1.29149	1.66948		-0.00302455	-0.172491	0.52876	-0.119697		-0.266331	-0.309677	-0.184453	-0.447465		-0.226661	-0.298545	-0.238285		0.365097	-0.552061	-0.508923		-0.544564	-0.521167	-0.605845		-0.106879	-0.0774463	-0.462671	0.80152	-0.304081	-0.439753		YLR056W	YLR056W ... ERG3 ergosterol biosynthesis C-5 sterol desaturase activity endoplasmic reticulum | YLR057W	1.3407	1.57754	1.40678	0	-0.132795
YMR304C-A	YMR304C-A ... | YMR304W	yes	.		1.22302	-1.59571	0.678475		-0.521821	-0.478381	-0.363795	0.108435		-0.316244	-0.0384082	-0.243636	0.0415655		0.539932	0.577118	0.442294	0.499564		0.58697	0.447313	0.266417		0.00864133	0.332173	-0.0355522		0.407623	0.404437	0.0932674		0.178818	0.248776	1.41493	1.097	1.15229	1.15476		YMR304C-A	YMR304C-A ... | YMR304W	#N/A	#N/A	#N/A	#N/A	#N/A
YHR089C	YHR089C PAC cluster GAR1 rRNA modification* RNA binding nucleolus* | YHR090C	yes	.		-0.29977	-0.164245	-0.317133		-0.4599	-0.119271	-0.207682	-0.299715		-1.09226	-0.246995	-0.414936	-0.510048		-0.39448	-0.572735	-0.491355	-0.471382		0.913836	1.03558	0.957312		-0.111992	-0.0150013	-0.146165		-0.237282	0.0887191	0.0100799		0.83963	0.715519	0.154282	0.727932	0.422713	0.60173		YHR089C	YHR089C PAC cluster GAR1 rRNA modification* RNA binding nucleolus* | YHR090C	0.214649	-0.004237	-0.188013	0	0.023837
YIL052C	YIL052C RP cluster RPL34B protein biosynthesis structural constituent of ribosome cytosolic large ribosomal subunit ( | YIL053W	yes	.		-0.110058	-0.055744	-0.361992		-0.382831	-0.653727	-0.0922234	-0.737153		-1.07669	-0.766006	-0.710771	-0.480105		-0.389572	-0.622497	-0.45092	-0.161529		-0.366759	-0.0971806	-0.141219		-0.547848	0.0147435	-0.0320678		0.0873205	0.0296654	0.145907		-0.222543	-0.257902	-0.675989	-1.02974	-0.607019	-0.506621		YIL052C	YIL052C RP cluster RPL34B protein biosynthesis structural constituent of ribosome cytosolic large ribosomal subunit ( | YIL053W	#N/A	#N/A	#N/A	#N/A	#N/A
YML014W	YML014W ... TRM9 response to stress* tRNA methyltransferase activity cytoplasm* | YML015C	yes	.		0.418318	0.221458	-0.25491		0.0892734	0.001038	0.222575	-0.361856		-1.35331	-0.512339	-1.46094	-0.523921		-0.848564	-0.172514	-0.812333	-0.0304165		0.00963991	0.0784003	-0.00610888		0.73842	-0.231911	-0.298425		0.0742748	0.0178338	0.0116906		0.421944	0.099678	-6.39e-05	-1.04161	0.187546	0.103614		YML014W	YML014W ... TRM9 response to stress* tRNA methyltransferase activity cytoplasm* | YML015C	0.134816	0.074344	0.123962	0	-0.262717
YLR018C	YLR018C ... POM34 nucleocytoplasmic transport molecular function unknown nuclear pore | YLR019W	yes	.		0.900902	1.30469	0.893963		0.727288	0.981155	1.21862	0.691635		-1.27728	-0.216195	-0.428319	-0.715191		-0.0442208	-1.10634	-0.437683	-0.0802175		0.0425001	0.0767582	-0.0841114		-1.10059	0.00172059	-0.121226		-0.019986	-0.0818106	-0.160114		0.115714	-0.160102	0.180374	-0.244385	-0.0683336	-0.072367		YLR018C	YLR018C ... POM34 nucleocytoplasmic transport molecular function unknown nuclear pore | YLR019W	1.03061	0.991485	0.778446	0	0.117973
YOR078W	YOR078W ... BUD21 processing of 20S pre-rRNA snoRNA binding small nucleolar ribonucleoprotein c | YOR079C	yes	.		0.77363	0.1574	-0.032254		0.0875569	0.100224	0.278745	-0.617463		-1.81898	-1.06698	-1.09498	-0.999814		-0.471209	-1.09864	-0.585012	-0.118334		-0.0592132	0.201701	-0.208602		-0.68555	0.275884	-0.0647861		0.0360847	0.205386	0.238077		-0.158217	0.0350689	-0.457357	-1.38323	0.762103	0.930575		YOR078W	YOR078W ... BUD21 processing of 20S pre-rRNA snoRNA binding small nucleolar ribonucleoprotein c | YOR079C	-0.636161	-1.04546	0.444956	0	-1.61326
YIL144W	YIL144W ... TID3 chromosome segregation* structural constituent of cytoskelecondensed nuclear chromosome kineto | YIL145C	yes	.		-0.206305	-0.199671	-0.591132		-0.283281	-1.35792	0.214713	-1.19323		-0.38246	-0.478981	0.469801	-0.61833		-0.183228	0.582374	-0.03339	0.181414		-0.278641	0.47032	-0.164807		0.0452631	1.28245	0.529977		0.662856	0.58337	0.848391		-0.0943056	-0.364396	0.0126925	-0.949025	0.400964	0.235493		YIL144W	YIL144W ... TID3 chromosome segregation* structural constituent of cytoskelecondensed nuclear chromosome kineto | YIL145C	0.081126	-0.32499	-0.205835	0	0.203348
YGL116W	YGL116W ... CDC20 mitotic sister chromatid segre enzyme activator activity anaphase-promoting complex | YGL117W	yes	.		0.230078	-0.05629	-0.200787		-0.257746	-0.426021	-0.246444	-0.391416		-1.53774	-0.721218	-0.899433	-0.69851		-0.501545	-0.653824	-0.8522	-0.230888		0.17896	-0.0624998	-0.0816599		0.500863	0.410607	0.324095		-0.00297991	0.293072	0.381341		-0.0586817	-0.376411	-0.256937	-0.763074	0.412856	0.148397		YGL116W	YGL116W ... CDC20 mitotic sister chromatid segre enzyme activator activity anaphase-promoting complex | YGL117W	#N/A	#N/A	#N/A	#N/A	#N/A
YFL050C	YFL050C ... ALR2 magnesium ion transport* "di-, tri-valent inorganic cation tr"plasma membrane | YFL051C	yes	.		0.430879	0.005668	0.195714		0.0911147	0.54897	0.438451	-0.370626		-0.452849	-0.286336	-2.20262	-0.761779		0.156259	-0.398517	-0.0536905	0.511078		0.189283	0.0714956	0.214391		0.250319	0.0723056	0.35017		0.640996	0.635152	0.671164		0.0799235	-0.0406584	-0.00349417	-1.14569	0.616145	0.426644		YFL050C	YFL050C ... ALR2 magnesium ion transport* "di-, tri-valent inorganic cation tr"plasma membrane | YFL051C	#N/A	#N/A	#N/A	#N/A	#N/A
YNL046W	YNL046W ... YNL046W biological process unknown molecular function unknown endoplasmic reticulum | YNL047C	yes	.		0.858109	0.340926	-0.406857		0.602548	0.104131	-0.304362	-0.210754		0.696014	0.125091	-1.6867	-0.285668		-0.171155	0.260446	-0.240516	0.0159572		0.155062	0.0300993	-0.129491		-1.18805	-0.422952	-0.460081		-0.561519	-0.927855	-0.635793		-0.0790017	-0.205939	-0.16977	0.554408	-0.0381203	-0.107723		YNL046W	YNL046W ... YNL046W biological process unknown molecular function unknown endoplasmic reticulum | YNL047C	#N/A	#N/A	#N/A	#N/A	#N/A
YGL212W	YGL212W ... VAM7 vesicle fusion* v-SNARE activity vacuolar membrane (sensu Fungi) | YGL213C	yes	.		0.097492	0.177696	0.147961		0.208572	-2.10999	0.137897	-0.911194		-0.282924	-0.453446		-0.143649		0.0094172	1.26045	-0.395686	0.534646		-0.471171	0.0318904	-0.243148		-0.45814	0.281667	-0.111395		1.31546	0.433687	0.748871		0.0214886	-0.00240578	-0.18225	-1.29359	0.388769	0.126742		YGL212W	YGL212W ... VAM7 vesicle fusion* v-SNARE activity vacuolar membrane (sensu Fungi) | YGL213C	0.069983	-0.262169	-0.000333	0	0.119641
YDL189W	YDL189W ... RBS1 galactose metabolism molecular function unknown cytoplasm | YDL190C	yes	.		-0.335614	-0.446125	-0.322934		-0.313654	-0.46363	0.0225919	-0.499768		-1.60485	-0.754615	-0.978659	-1.14365		-0.590975	-0.450048	-0.287174	-0.613745		0.01262	-0.103395	-0.121586		-0.171795	-0.155204	-0.0532581		-0.085081	0.144011	0.314376		-0.141144	0.0467193	-0.47287	-0.632678	-0.258209	-0.0459884		YDL189W	YDL189W ... RBS1 galactose metabolism molecular function unknown cytoplasm | YDL190C	-0.107361	0.06522	0.129887	0	-0.131743
YHR086W	YHR086W ... NAM8 nuclear mRNA splicing, via spl RNA binding* commitment complex* | YHR086W-A	yes	.		-0.425529	-0.327902	0.216217		-0.534538	-0.694956	-0.479479	-0.445531		0.859587	0.369398	0.376692	0.400017		0.509846	0.511407	0.49423	0.583556		0.683346	0.784141	0.877765		0.691141	0.244398	0.149881		0.295574	0.0400089	-0.158828		0.641305	0.894588	0.896738	1.3919	1.46932	1.52699		YHR086W	YHR086W ... NAM8 nuclear mRNA splicing, via spl RNA binding* commitment complex* | YHR086W-A	-0.399092	-0.444953	-0.778725	0	0.595276
YIL063C	YIL063C ... YRB2 mRNA-nucleus export* structural molecule activity nuclear pore | YIL064W	yes	.		0.215863	0.187232	-0.120968		0.5305	-0.109993	0.272594	-0.772674		-0.697962	0.2026	-0.456198	-0.0780611		-0.727548	-0.877058	-0.112428	0.666185		0.00151661	-0.0509798	-0.0484197		0.0290475	0.98542	1.08721		1.11845	0.981889	1.2888		-0.0906718	0.0950937	0.0921167	-0.265575	0.567325	0.753016		YIL063C	YIL063C ... YRB2 mRNA-nucleus export* structural molecule activity nuclear pore | YIL064W	-0.309639	-0.44898	-0.065654	0	-0.355358
YML050W	YML050W Ö AIM32 biological process unknown molecular function unknown | Putative protein of unknown function; null mutant is viable and displays elevated frequency of mitochondrial genome lossYML051W	yes	.		0.136867	-0.373319	-0.433999		-2.46385	-1.69496	-1.16166	-1.34004		-1.95535	-0.623371	-1.43709	-1.18547		-0.575545	1.26045	0.595752	0.378527		-0.319354	-0.361268	-0.449716		-0.054784	0.0524472	0.213268		0.808004	0.373314	0.215762		-0.22218	-0.246702	-0.290006	0.622579	-0.289303	0.120913		YML050W	YML050W Ö AIM32 biological process unknown molecular function unknown | Putative protein of unknown function; null mutant is viable and displays elevated frequency of mitochondrial genome lossYML051W	#N/A	#N/A	#N/A	#N/A	#N/A
YDR235W	YDR235W ... PRP42 nuclear mRNA splicing, via spl RNA binding commitment complex* | YDR236C	yes	.		0.123814	-0.140517	0.185902		-0.0470826	0.416076	0.294766	-1.02367		-1.48086	-0.594802	-0.324615	-0.671162		-0.747312	-0.739554	-0.29503	0.431393		0.252941	-0.277475	-0.16605		0.250319	-0.112612	-0.43031		-0.181654	0.120195	-0.167045		-0.473719	-0.616167	-0.627041	-0.944825	-0.444715	-0.186624		YDR235W	YDR235W ... PRP42 nuclear mRNA splicing, via spl RNA binding commitment complex* | YDR236C	#N/A	#N/A	#N/A	#N/A	#N/A
YDL047W	YDL047W ... SIT4 cell wall organization and bio protein serine/threonine phosphatascytoplasm* | YDL048C	yes	.		0.096408	-0.422922	0.143708		-0.115386	0.254579	0.1994	-0.382375		-0.556958	-0.40614	-0.85867	-0.630178		0.0094172	-0.871466	-0.461211	-0.0427028		0.0561116	-0.0126371	0.0290193		0.0960262	0.327429	0.146469		0.0772867	0.149884	0.152152		-0.0246199	-0.227299	-0.183593	-1.18145	-0.0362473	-0.225985		YDL047W	YDL047W ... SIT4 cell wall organization and bio protein serine/threonine phosphatascytoplasm* | YDL048C	0.112585	0.105381	0.192529	0	-0.024216
YJL079C	YJL079C ... PRY1 biological process unknown molecular function unknown endoplasmic reticulum* | YJL080C	yes	.		-1.09446	-1.20339	-0.499523		-1.46385	-1.17412	-2.71602	-2.26483		0.214575	-0.754615	-0.139008	-0.0525015		0.59438	0.501454	1.48884	1.51672		0.127047	-0.709191	-0.0935717			-0.849578	0.535196		-0.085081	0.0513863	0.00163691		-0.480915	-0.404463	1.4876	1.94742	1.3187	0.646285		YJL079C	YJL079C ... PRY1 biological process unknown molecular function unknown endoplasmic reticulum* | YJL080C	#N/A	#N/A	#N/A	#N/A	#N/A
YOR249C	YOR249C ... APC5 mitotic sister chromatid segre protein binding* anaphase-promoting complex | YOR250C	yes	.		-0.04606	0.368088	-0.012536		-0.269475	-0.76207	0.34818	-0.351767		-0.760972	-0.690485	-1.08479	-0.391577		-0.0609721	0.153531	-0.0714637	0.484157		0.0201323	0.223694	-0.00610888		0.326523	0.697417	0.834894		0.382045	0.363467	0.753139		-0.254077	-0.138263	-0.360396	-0.736107	0.735749	1.02209		YOR249C	YOR249C ... APC5 mitotic sister chromatid segre protein binding* anaphase-promoting complex | YOR250C	#N/A	#N/A	#N/A	#N/A	#N/A
YFL002C	YFL002C PAC cluster SPB4 35S primary transcript process ATP-dependent RNA helicase activitynucleolus | YFL003C	yes	.		0.108381	0.048144	-0.231825		0.0551354	-0.8262	0.0155231	-0.156715		-0.666974	-0.889545	-1.16827	-0.630178		-0.146234	0.153531	-0.206684	-0.262049		-0.0205097	0.034231	-0.0363235		-0.270513	-0.0276144	-0.287224		0.0188082	-0.075075	-0.138541		-0.110029	0.00658037	-0.556793	-0.791563	-0.34846	-0.102045		YFL002C	YFL002C PAC cluster SPB4 35S primary transcript process ATP-dependent RNA helicase activitynucleolus | YFL003C	-0.101732	0.222693	0.148664	0	-0.334892
YJR110W	YJR110W ... YMR1 vesicle-mediated transport* phosphoric monoester hydrolase acticytoplasm | YJR111C	yes	.		-0.144542	-0.055048	0.005941		-0.121817	-0.525031	0.562636	-0.911194		-0.308459	-0.337968	-0.404668	-0.569914		0.381386	0.260446	0.0558773	0.347848		0.0969194	-0.0589374	-0.0719968		0.255556	0.322325	0.137232		0.361527	0.499554	0.409917		-0.433427	-0.190106	1.03757	1.08075	-0.231852	0.0267594		YJR110W	YJR110W ... YMR1 vesicle-mediated transport* phosphoric monoester hydrolase acticytoplasm | YJR111C	-0.651872	-0.767831	0.05673	0	-0.317115
YLR020C	YLR020C ... YEH2 cell wall mannoprotein biosynt sterol esterase activity plasma membrane* | YLR021W	yes	.		0.778941	0.704802	0.778886		0.604244	1.13918	1.16297	0.820873		-1.08548	-0.325289	-1.40232	-0.46405		-0.133947	-0.875069	-0.450844	-0.140158		0.258919	0.339296	0.198032		-0.0923672	0.222778	0.13196		0.00955588	0.122489	0.287039		0.124626	-0.156509	-0.264961	-0.430719	-0.0951074	0.0334664		YLR020C	YLR020C ... YEH2 cell wall mannoprotein biosynt sterol esterase activity plasma membrane* | YLR021W	0.98557	1.44712	0.828787	0	0.250465
YOR227W	YOR227W Ö HER1 biological process unknown molecular function unknown | Protein of unknown function required for proliferation or remodeling of the ER that is caused by overexpression of Hmg2p; may interact with ribosomes, based on co-purification experimentsYOR228C	yes	.		-0.470645	-0.312668	-0.255348		-0.37639	-0.542953	-0.715161	-0.0732996		0.0796457	-0.0563301	-0.300717	-0.0362365		0.241591	0.601483	0.760038	0.330194		0.0281956	0.335508	0.0482363		0.0427074	0.248463	-0.188355		0.29548	0.0716208	0.167705		-0.131385	-0.213447	-0.10354	-0.313734	1.90082	1.81932		YOR227W	YOR227W Ö HER1 biological process unknown molecular function unknown | Protein of unknown function required for proliferation or remodeling of the ER that is caused by overexpression of Hmg2p; may interact with ribosomes, based on co-purification experimentsYOR228C	-0.551241	-1.23958	-0.838901	0	0.178286
YKL004W	YKL004W ... AUR1 sphingolipid metabolism inositol phosphoceramide synthase aGolgi apparatus | YKL005C	yes	.		-0.276624	0.132363	0.410042		0.216161	0.203281	-0.0843951	0.296256		0.136828	0.0855241	0.204518	0.0466502		-0.2532	-0.116524	-0.0752168	-0.132014		0.07543	-0.0815023	0.0200941		0.149311	-0.167589	-0.163362		-0.520489	-0.295137	-0.396535		-0.0350434	-0.0852253	-0.102136	0.424308	-0.186506	-0.252774		YKL004W	YKL004W ... AUR1 sphingolipid metabolism inositol phosphoceramide synthase aGolgi apparatus | YKL005C	-0.18709	-0.197854	-0.083771	0	-0.162434
YIL147C	YIL147C ... SLN1 protein amino acid phosphoryla osmosensor activity* plasma membrane | YIL148W	yes	.		-0.621005	-0.328429	-0.308626		-0.138457	-0.080246	-0.134448	-0.068063		-0.267383	-0.254137	-1.06585	-0.27875		-0.119866	-0.555522	-0.15171	-0.0209666		0.129368	0.00416171	-0.0507875		-0.232528	-0.179726	-0.166306		-0.0538403	-0.0395028	0.134581		0.135271	0.0390857	0.0310743	-0.272294	0.0441474	-0.0267269		YIL147C	YIL147C ... SLN1 protein amino acid phosphoryla osmosensor activity* plasma membrane | YIL148W	0.062207	-0.450698	-0.463597	0	0.350133
YGR014W	YGR014W ... MSB2 establishment of cell polarity osmosensor activity integral to plasma membrane* | YGR015C	yes	.		-0.286866	0.070016	0.346462		-1.29643	-1.3612	-1.38157	-1.01506		-0.127911	-0.185052	-0.243342	-0.283363		0.617537	0.493596	0.577493	0.435684		0.82701	0.635927	0.786465		0.743743	0.520121	0.650328		0.193002	0.123455	0.119222		-0.218238	-0.246407	-0.153361	0.0985331	0.249464	0.163533		YGR014W	YGR014W ... MSB2 establishment of cell polarity osmosensor activity integral to plasma membrane* | YGR015C	#N/A	#N/A	#N/A	#N/A	#N/A
YDR245W	YDR245W ... MNN10 actin filament organization* "alpha-1,6-mannosyltransferase activ"mannosyltransferase complex | YDR246W	yes	.		-0.214084	-0.242599	-0.149598		-0.380578	-0.131367	0.0977906	-0.603072		-1.23764	-0.370984	-0.533201	-0.379462		-0.16892	-0.67636	-0.455395	0.0335156		-0.110491	-0.0338711	-0.0591273		-0.411375	0.173692	0.213361		0.178548	-0.0200362	0.067611		-0.211873	-0.330103	-0.586212	-1.02148	-0.370723	-0.409621		YDR245W	YDR245W ... MNN10 actin filament organization* "alpha-1,6-mannosyltransferase activ"mannosyltransferase complex | YDR246W	0.513347	0.574977	0.057624	0	0.887958
YML017W	YML017W ... PSP2 biological process unknown molecular function unknown cytoplasm | YML018C	yes	.		-0.093404	-0.150274	-0.476035		-0.477928	-0.457917	-0.387597	-0.666957		-0.7995	-0.439771	-0.253815	-1.22529		-0.0944186	-0.198986	-0.516344	-0.411198		0.065351	-0.0103244	0.0596664		-0.436191	0.00506412	0.308282		0.0506727	0.0532734	0.0987594		0.0808696	-0.101135	-0.307284	-0.600969	0.12485	0.0357682		YML017W	YML017W ... PSP2 biological process unknown molecular function unknown cytoplasm | YML018C	-0.161532	-0.285707	-0.286752	0	0.10538
YDL019C	YDL019C ... OSH2 steroid biosynthesis oxysterol binding plasma membrane* | YDL020C	yes	.		-0.604725	-0.533784	-0.452237		-0.394312	-0.158667	-0.275972	-0.100326		-0.815419	-0.341655	-0.845129	-0.285838		-0.302527	-0.423295	-0.415136	-0.302167		-0.0804084	-0.114268	-0.133438		-0.366035	0.213973	0.0927593		0.192956	0.169915	0.161533		-0.213673	-0.180572	-0.56551	-0.542616	-0.183101	-0.179148		YDL019C	YDL019C ... OSH2 steroid biosynthesis oxysterol binding plasma membrane* | YDL020C	-0.410317	-0.641028	-0.609318	0	0.001306
YOL053W	YOL053W Ö AIM39 biological process unknown molecular function unknown | Putative protein of unknown function; null mutant displays elevated frequency of mitochondrial genome lossYOL054W	yes	.		-0.145365	0.231272	0.070793		-0.44678	0.697362	0.459825	-1.5301		-2.67524	0.768947	-0.922516	-0.926058		1.00942	-0.224981	-0.733556	0.402857		0.0561116	0.34784	0.819862		1.17695	0.714551	1.32673		1.01113	0.470612	0.670431		-0.108435	-0.597199	-0.00272422	-0.547346	1.63541	1.39655		YOL053W	YOL053W Ö AIM39 biological process unknown molecular function unknown | Putative protein of unknown function; null mutant displays elevated frequency of mitochondrial genome lossYOL054W	0.07075	0.419488	-0.18218	0	0.824721
YDL150W	YDL150W PAC cluster RPC53 transcription from RNA polymer DNA-directed RNA polymerase activitDNA-directed RNA polymerase III com | YDL151C	yes	.		0.518848	-0.049106	-0.00601		0.139576	0.261975	0.395119	-0.549234		-1.27597	-0.666439	-1.1407	-0.86064		-0.676474	-0.976593	-0.664638	-0.296377		0.167563	0.184902	0.0587807		0.332597	0.370136	0.146786		0.295895	0.207919	0.386301		-0.118803	-0.0170196	-0.571059	-0.732701	-0.362119	-0.24389		YDL150W	YDL150W PAC cluster RPC53 transcription from RNA polymer DNA-directed RNA polymerase activitDNA-directed RNA polymerase III com | YDL151C	-0.161223	-0.040997	-0.083646	0	-0.468855
YPL076W	YPL076W ... GPI2 GPI anchor biosynthesis molecular function unknown endoplasmic reticulum* | YPL077C	yes	.		-0.383496	-0.01884	0.438756		-0.329084	0.0420098	-0.288339	-0.229164		0.0196384	-0.14944	-0.130112	-0.208501		0.142684	-0.0614823	0.0633525	-0.0113219		0.391047	0.216808	0.315819		0.846301	0.0679602	0.0612653		-0.438718	-0.552685	-0.29923		0.000211978	-0.00289892	1.43662	1.81249	0.450489	-0.0472875		YPL076W	YPL076W ... GPI2 GPI anchor biosynthesis molecular function unknown endoplasmic reticulum* | YPL077C	#N/A	#N/A	#N/A	#N/A	#N/A
YML064C	YML064C ... TEM1 signal transduction* protein binding* spindle pole body | YML065W	yes	.		0.321855	-0.132855	-0.193594		0.11665	0.568079	-0.37971	-1.27376		-0.0378118	0.546554	-0.617662	-0.956022		-0.431155	-0.0391145	0.179509	0.660654		-0.162317	-0.334796	-0.026573		-1.07021	0.102127	0.414019		0.479417	0.56596	0.331786		0.0969692	-0.242465	-0.134355	-0.915077	0.269766	0.0767955		YML064C	YML064C ... TEM1 signal transduction* protein binding* spindle pole body | YML065W	-0.093583	0.452447	0.341346	0	0.399313
YOL069W	YOL069W ... NUF2 chromosome segregation* structural constituent of cytoskelespindle pole body* | YOL070C	yes	.		-0.350799	-0.052376	-0.498983		0.301682	-0.97249	-0.0722518	-1.07558		-1.18981	-0.360336	-1.21202	-0.91809		-0.810011	0.385977	-0.338982	0.150597		0.202996	0.166361	0.0599803		0.596849	0.394789	0.273424		0.00238185	-0.221429	0.0440722		-0.19093	0.0264558	-0.31275	-0.400504	1.23945	1.12603		YOL069W	YOL069W ... NUF2 chromosome segregation* structural constituent of cytoskelespindle pole body* | YOL070C	-0.42783	-0.702998	-0.160904	0	-0.058834
YDR419W	YDR419W ... RAD30 DNA repair* eta DNA polymerase activity replication fork | YDR420W	yes	.		0.147735	-0.057028	-0.258515		-0.189622	-0.0510996	0.733586	-0.320838		-1.525	-0.816016	-1.01133	-0.352596		-0.419426	-0.682971	-0.76355	0.321		-0.0364512	-0.086261	-0.21256		0.713546	0.243532	-0.138011		0.315457	-0.0521699	-0.11384		-0.305992	-0.155153	-0.519001	-0.832615	-0.204647	0.163745		YDR419W	YDR419W ... RAD30 DNA repair* eta DNA polymerase activity replication fork | YDR420W	-0.592066	-0.349912	-0.424478	0	-0.423774
YLR353W	YLR353W ... BUD8 pseudohyphal growth* molecular function unknown bud tip* | YLR354C	yes	.		0.433795	0.567639	0.565774		0.905812	0.290545	0.788012	0.527753		-0.282924	-0.303753	-1.05376	-0.783653		-0.383816	-0.337692	-0.44008	-0.310508		0.0274248	0.0814462	0.125856		-0.140116	0.157193	-0.0547494		0.38409	0.0960861	-0.0392934		0.00958756	-0.0565615	-0.301858	-0.352483	0.0303054	-0.113392		YLR353W	YLR353W ... BUD8 pseudohyphal growth* molecular function unknown bud tip* | YLR354C	1.0404	0.459392	0.718555	0	0.857566
YFR038W	YFR038W Ö IRC5 biological process unknown helicase activity | Putative ATPase containing the DEAD/H helicase-related sequence motif; null mutant displays increased levels of spontaneous Rad52p fociYFR039C	yes	.		-0.356226	-0.203394	-0.301625		-0.0988562	-0.192455	0.113267	-0.230736		-1.00539	-0.435744	-1.70012	-0.33766		-0.373911	-1.01966	-0.42764	-0.243529		0.0915169	0.030802	-0.204828		-0.344042	0.211739	-0.119975		0.00647295	0.345834	0.312566		-0.00347621	-0.154816	-0.102486	-0.850779	-0.0651061	-0.0340262		YFR038W	YFR038W Ö IRC5 biological process unknown helicase activity | Putative ATPase containing the DEAD/H helicase-related sequence motif; null mutant displays increased levels of spontaneous Rad52p fociYFR039C	-0.413255	1.01263	-0.006217	0	-0.024419
YPL074W	YPL074W ... YTA6 biological process unknown ATPase activity cell cortex | YPL075W	yes	.		-0.504265	-0.381732	-0.251688		-0.596068	-0.0104576	0.1173	-0.358653		-1.35821	-0.938873	-0.545149	-0.288039		-0.194116	-0.398517	-0.292818	-0.0102814		-0.149355	-0.0975937	-0.0598801		-0.202126	-0.103679	-0.130821		-0.0577736	0.172267	0.00163691		-0.0269729	-0.122722	0.798803	-0.21764	-0.195015	0.18927		YPL074W	YPL074W ... YTA6 biological process unknown ATPase activity cell cortex | YPL075W	0.256118	0.385846	0.094533	0	0.435219
YML096W	YML096W ... YML096W biological process unknown molecular function unknown cytoplasm | YML097C	yes	.		0.09305	0.040999	-0.205595		-0.194013	0.285935	0.312135	0.012857		-0.898914	0.0355924	0.256022	-0.099928		-0.225048	-0.508941	-0.48979	-0.037377		-0.00411526	-0.025739	-0.233519		0.433094	0.369451	0.168628		0.241729	-0.000809876	0.213941		0.101426	-0.272809	-0.439753	-0.142613	-0.161163	-0.157498		YML096W	YML096W ... YML096W biological process unknown molecular function unknown cytoplasm | YML097C	-0.072116	0.488022	0.56981	0	-0.327628
YOR329C	YOR329C ... SCD5 endocytosis* protein binding actin cortical patch* | YOR330C	yes	.		0.004497	-0.016536	-0.054998		0.127915	-0.18275	0.165082	0.168976		-0.468279	-1.06225	-1.3168	-0.629076		0.365561	-0.239983	-0.145035	-0.219023		0.0260329	0.0299921	-0.197899		0.723562	0.56546	0.235839		0.575713	0.518654	0.731749		-0.201915	-0.161328	0.159797	-0.0891067	1.2546	1.34197		YOR329C	YOR329C ... SCD5 endocytosis* protein binding actin cortical patch* | YOR330C	0.117459	0.131901	-0.165321	0	0.180383
YJL129C	YJL129C ... TRK1 potassium ion homeostasis potassium ion transporter activity plasma membrane | YJL130C	yes	.		-0.528082	-0.271352	-0.232338		-0.124851	-0.242188	-0.0758421	-0.136418		-0.664014	-0.373695	-1.34013	-0.406199		-0.268117	-0.438174	-0.339169	-0.20421		-0.0560157	0.0160551	-0.0813036		-0.512191	0.0821839	-0.0547289		0.219342	0.140856	0.227438		-0.0751698	-0.116248	0.762879	0.79696	-0.125965	-0.055204		YJL129C	YJL129C ... TRK1 potassium ion homeostasis potassium ion transporter activity plasma membrane | YJL130C	0.322415	0.145245	-0.069169	0	-0.136557
YBR076C-A	YBR076C-A Ö Dubious Dubious open reading frame unlikely to encode a protein; partially overlaps verified gene ECM8; identified by fungal homology and RT-PCRYBR109W-A	yes	.		-0.040012	-0.203394	0.398597		-0.67756	-1.18038	-0.183481	-0.448851		-0.691009	-0.730286	-0.302788	-0.591108		-0.097498	0.260446	0.447017	0.0178555		0.166576	-0.446157	-0.500874		0.198973	-0.112612	0.752527		0.229028	0.373314	0.790133		-0.237019	0.27834	-6.39e-05	0.377103	0.00432435	0.693598		YBR076C-A	YBR076C-A Ö Dubious Dubious open reading frame unlikely to encode a protein; partially overlaps verified gene ECM8; identified by fungal homology and RT-PCRYBR109W-A	#N/A	#N/A	#N/A	#N/A	#N/A
YNL127W	YNL127W ... FAR11 cell cycle arrest in response molecular function unknown cellular component unknown | YNL128W	yes	.		-0.110006	-0.156744	-0.1433		-0.415071	0.0943652	0.558197	-0.265859		-0.89097	-0.169653	-0.484395	-0.0803235		0.240743	-0.0412099	-0.519337	0.247765		0.136294	0.21041	0.0529859		0.513759	0.674539	0.214776		0.609077	0.558346	0.597814		0.0692358	-0.152355	-0.191108	0.0136176	0.0666535	0.256792		YNL127W	YNL127W ... FAR11 cell cycle arrest in response molecular function unknown cellular component unknown | YNL128W	0.579766	0.08384	0.094211	0	0.352981
YGL021W	YGL021W ... ALK1 mitosis protein serine/threonine kinase actnucleus | YGL022W	yes	.		-0.550335	-0.186116	-0.014249		-0.140323	-0.478144	-0.0250772	-0.500061		-0.545959	-0.293665	-0.463562	-0.475359		-0.259072	-0.211623	-0.152269	-0.0270462		0.0463012	0.0814969	0.173541		0.165224	0.39287	0.152904		0.0887312	0.133354	-0.0839234		-0.0888437	-0.141641	-0.122452	-0.421936	0.305962	0.43728		YGL021W	YGL021W ... ALK1 mitosis protein serine/threonine kinase actnucleus | YGL022W	-0.25905	-0.249579	-0.44429	0	-0.132471
YNL326C	YNL326C ... PFA3 biological process unknown molecular function unknown vacuole (sensu Fungi) | YNL327W	yes	.		-0.034037	0.443686	0.282054		-0.159292	-0.782419	-0.330721	0.110022		-0.905362	-0.462906	-0.700124	-0.27795		0.169882	0.30484	-0.0831867	-0.107602		0.32558	-0.147499	-0.235976		0.407559	-0.232906	-0.417714		-0.450536	-0.372803	-0.475942		-0.332604	-0.302928	0.32309	0.00996062	-0.441472	0.0364704		YNL326C	YNL326C ... PFA3 biological process unknown molecular function unknown vacuole (sensu Fungi) | YNL327W	#N/A	#N/A	#N/A	#N/A	#N/A
YAL025C	YAL025C PAC cluster MAK16 ribosomal large subunit biogen molecular function unknown nucleolus | YAL026C	yes	.		0.368594	0.661323	-0.170879		0.246755	0.295999	0.817719	-0.566204		-0.918513	-0.315942	-0.894771	-0.616821		-0.664355	-2.00804	-0.685193	0.242612		-0.0809133	0.058993	-0.0254742		-0.301015	0.217309	0.192928		0.0890342	0.474124	0.380898		0.344834	0.087021	-0.444093	-1.06708	-0.180846	-0.0265977		YAL025C	YAL025C PAC cluster MAK16 ribosomal large subunit biogen molecular function unknown nucleolus | YAL026C	-0.297336	-0.390437	0.064666	0	-0.691471
YDL231C	YDL231C ... BRE4 endocytosis molecular function unknown integral to membrane | YDL232W	yes	.		-0.526255	-0.284223	0.010141		-0.200725	-0.119256	-0.26875	0.0753226		-0.164161	-0.220212	-0.344616	-0.244898		-0.0838693	-0.1788	-0.0835342	-0.0839255		0.138427	-0.0558334	0.0707555		0.00837562	-0.0963307	-0.215051		-0.22911	-0.11437	-0.147498		-0.132402	-0.215254	-0.424623	-0.203875	-0.291079	-0.268105		YDL231C	YDL231C ... BRE4 endocytosis molecular function unknown integral to membrane | YDL232W	0.035028	-0.460306	-0.614796	0	0.398233
YNL151C	YNL151C PAC cluster RPC31 transcription from RNA polymer DNA-directed RNA polymerase activitDNA-directed RNA polymerase III com | YNL152W	yes	.		0.027103	0.141254	-0.253962		-0.15839	-0.525031	0.0609073	-0.793543		-1.25255	-0.816016	-0.684004	-0.714537		-1.02621	-1.32452	-0.806619	-0.0301784		-0.054457	0.117846	0.0224603		0.05811	0.14695	-0.213842		0.443847	0.250979	0.242101		-0.267496	-0.234118	-0.844595	-0.392851	-0.271557	-0.278947		YNL151C	YNL151C PAC cluster RPC31 transcription from RNA polymer DNA-directed RNA polymerase activitDNA-directed RNA polymerase III com | YNL152W	-0.425535	-0.398595	0.283868	0	-0.867313
YDR134C	YDR134C	yes	.						-0.871155	-0.889945	-0.978162	-0.856358		0.659044	0.78061	-0.0210175	0.612402		-0.298011	0.210322	0.473331	0.0292786		-0.456095	-0.18629	-0.29701		0.502716	0.833232	0.857827		0.827161	0.440429	0.279938		-0.586742	-0.0812958	-0.674056	-0.183445	1.05851	1.44547		YDR134C	YDR134C	#N/A	#N/A	#N/A	#N/A	#N/A
YDR420W	YDR420W ... HKR1 cell wall organization and bio molecular function unknown plasma membrane | YDR421W	yes	.		-0.323869	-0.218991	-0.124021		-0.174346	-0.0364643	-0.11073	-0.368339		-0.0167502	-0.105971	-0.168799	-0.0480248		0.144932	0.0994539	0.321841	0.47011		-0.0926595	-0.0525909	-0.169978		0.37475	0.146044	0.220878		0.265416	0.0728579	0.244238		0.0218617	-0.188208	0.0239452	0.177369	0.398795	0.49609		YDR420W	YDR420W ... HKR1 cell wall organization and bio molecular function unknown plasma membrane | YDR421W	#N/A	#N/A	#N/A	#N/A	#N/A
YLR423C	YLR423C ... ATG17 autophagy kinase activator activity cytoplasm | YLR424W	yes	.		1.469	1.17157	0.862755		1.52407	0.211935	1.51872	-0.496157		0.132113	-1.03841		0.119385		-1.47601	-0.0614823	-1.03954	0.824153		0.116994	0.316344	-0.55865		0.899412	1.80795	1.07396		0.74089	1.26834	1.61831		0.272524	-0.0215146	1.1579	0.291374	0.89143	0.495976		YLR423C	YLR423C ... ATG17 autophagy kinase activator activity cytoplasm | YLR424W	#N/A	#N/A	#N/A	#N/A	#N/A
YOL089C	YOL089C ... HAL9 transcription initiation from specific RNA polymerase II transcrinucleus* | YOL090W	yes	.		-0.165865	-0.020065	-0.272229		-0.674071	-0.109993	0.0972551	-0.406519		-0.995642	0.0355924	-0.700124	-0.490452		-0.073045	-0.595164	-0.17556	0.265806		-0.0533655	-0.0180294	-0.480551		-1.01706	-0.174013	-0.433175		0.152314	-0.338025	0.064101		-0.308819	-0.311185	-0.21382	0.0895099	0.570767	0.517454		YOL089C	YOL089C ... HAL9 transcription initiation from specific RNA polymerase II transcrinucleus* | YOL090W	0.411834	-0.347053	-0.795143	0	0.332424
YNL239W	YNL239W ... LAP3 response to antibiotic transcription regulator activity* cytoplasm* | YNL240C	yes	.		-0.09418	-0.014337	0.12985		0.079005	-0.0916148	-0.00596566	0.0857133		-0.00743818	-0.312583	0.362612	-0.452507		0.264136	0.260446	0.22654	-0.116841		-0.21416	-0.23536	-0.164916		0.32322	0.16691	0.140875		0.423443	0.254849	0.353676		-0.0890178	-0.315494	-0.343193	0.0862408	-0.109177	-0.193182		YNL239W	YNL239W ... LAP3 response to antibiotic transcription regulator activity* cytoplasm* | YNL240C	0.212838	0.200316	0.037836	0	0.315318
YNL097W-A	YNL097W-A Ö Dubious Dubious open reading frame unlikely to encode a protein, based on available experimental and comparative sequence data; completely overlaps the verified gene PHO23/YNL097CYNL103W-A	yes	.		1.28192	-0.788357	-0.414634		2.03865		0.0447876	0.673768				1.14787	0.856351				-1.41805	-0.576385		0.657562	-1.12423	-0.854106		2.31445	0.887388	-0.383767		0.236847	1.78835	-0.320291		0.941318	0.772035	0.902639		1.43059	-1.34274		YNL097W-A	YNL097W-A Ö Dubious Dubious open reading frame unlikely to encode a protein, based on available experimental and comparative sequence data; completely overlaps the verified gene PHO23/YNL097CYNL103W-A	#N/A	#N/A	#N/A	#N/A	#N/A
YHR073W	YHR073W ... OSH3 steroid biosynthesis oxysterol binding cytoplasm | YHR073W-A	yes	.		-0.47842	-0.252781	-0.305541		-0.029917	-0.0364122	0.0797061	-0.168149		-0.745403	-0.0384082	-0.296377	-0.377626		-0.367818	-0.700241	-0.255115	-0.0208388		0.990356	0.971825	0.771345		-0.0375356	-0.126727	-0.210675		0.103746	0.00415884	0.182907		0.91789	0.963928	0.827268	0.714973	0.881432	0.967112		YHR073W	YHR073W ... OSH3 steroid biosynthesis oxysterol binding cytoplasm | YHR073W-A	-0.133598	-0.320647	-0.135958	0	-0.049282
YLR141W	YLR141W ... RRN5 transcription from RNA polymer RNA polymerase I transcription factRNA polymerase I upstream activatin | YLR142W	yes	.		0.420623	0.820284	1.12284		0.945538	1.00548	1.01162	0.896161		-0.112999	-0.244859	0.232762	-0.109702		-0.142586	-0.17696	-0.164839	-0.173173		0.26189	0.40415	-0.0271705		-0.310041	0.164228	-0.322366		-0.24781	-0.353004	-0.13163		0.0532112	0.0939626	-0.466595	-0.593149	-0.0424805	-0.28385		YLR141W	YLR141W ... RRN5 transcription from RNA polymer RNA polymerase I transcription factRNA polymerase I upstream activatin | YLR142W	0.360467	0.318509	-0.003691	0	-0.557516
YAL015C	YAL015C ... NTG1 DNA repair* DNA-(apurinic or apyrimidinic site)nucleus* | YAL016C-B	yes	.		0.182381	0.028578	0.204229		-0.183745	0.420521	0.137897	-0.744084		-0.867887	0.251098	-1.02205	-0.847256		0.511918	-0.855031	-0.511163	0.836397		0.0949675	-0.0433088	0.252203		1.05142	0.295473	0.393841		0.318816	0.514787	0.41075		0.349783	-0.0957177	-0.308865	-0.0670804	0.244176	0.362129		YAL015C	YAL015C ... NTG1 DNA repair* DNA-(apurinic or apyrimidinic site)nucleus* | YAL016C-B	-0.149836	-0.086195	0.989617	0	0.313207
YDR334W	YDR334W ... SWR1 chromatin remodeling helicase activity nucleus* | YDR335W	yes	.		-0.062977	-0.014709	-0.334205		-0.1703	-0.171833	0.325655	-0.100736		-1.05822	-0.340299	-0.596288	-0.180361		-0.0774602	-0.729062	-0.651269	-0.138382		-0.0735709	-0.0950825	-0.0901323		-0.42921	0.196642	0.0523955		0.166125	0.272306	0.317061		-0.247033	-0.0463809	-0.432391	-0.718993	-0.176616	0.0879187		YDR334W	YDR334W ... SWR1 chromatin remodeling helicase activity nucleus* | YDR335W	0.22924	0.210708	0.08078	0	0.163126
YER118C	YER118C PAC cluster SHO1 pseudohyphal growth* osmosensor activity plasma membrane* | YER119C	yes	.		-0.273969	0.025329	-0.136252		-0.722414	-0.63123	-0.176316	-0.453865		-0.613841	-0.25925	0.136223	-0.36055		0.194449	0.134915	-0.2086	0.0162516		0.376618	-0.223764	0.0744566		0.632626	0.359669	0.490449		0.343762	0.594304	0.506034		-0.152256	-0.163615	-0.251689	-0.310562	-0.0181376	0.0691268		YER118C	YER118C PAC cluster SHO1 pseudohyphal growth* osmosensor activity plasma membrane* | YER119C	-0.704238	-0.23318	0.025061	0	-0.367745
YBL051C	YBL051C ... PIN4 G2/M transition of mitotic cel molecular function unknown cytoplasm | YBL052C	yes	.		-0.086822	-0.109941	-0.241072		-0.105743	-0.288963	-0.00799977	-0.389735		-1.52324	-0.991102	-0.591975	-0.885224		-0.179617	-0.823618	-0.37176	-0.564889		0.0561116	0.32323	0.181518		0.0394427	0.199192	0.159375		0.449255	0.0636647	0.198674		-0.255374	-0.00958284	0.100578	-0.289473	0.0342882	0.197567		YBL051C	YBL051C ... PIN4 G2/M transition of mitotic cel molecular function unknown cytoplasm | YBL052C	0.272077	0.014054	0.020086	0	0.166481
YLL043W	YLL043W ... FPS1 transport* transporter activity* cytoplasm* | YLL044W	yes	.		0.688345	0.583653	0.632948		0.905381	0.957121	0.794733	1.04592		-0.394635	-0.355437	-0.312267	-0.678194		-0.266707	-0.0119873	-0.154598	-0.416444		0.0627571	-0.051904	0.0190218		0.271564	0.039391	-0.0235033		0.0926731	0.0172313	-0.0327419		-0.0124869	-0.028434	-0.109934	-0.493153	-0.0781838	-0.275315		YLL043W	YLL043W ... FPS1 transport* transporter activity* cytoplasm* | YLL044W	1.25787	1.03175	1.17758	0	0.071468
YKR054C	YKR054C ... DYN1 mitotic sister chromatid segre motor activity cytoplasmic microtubule* | YKR055W	yes	.		-0.571851	-0.272036	-0.410041		-0.356109	-0.193249	-0.127393	-0.323742		-0.361133	-0.0451656	-0.566725	-0.326715		-0.0580458	-0.268483	-0.441742	0.0841693		0.077743	0.0901317	-0.0479291		-0.0247563	0.104104	-0.0122081		0.0343402	-0.00653364	0.079081		-0.00729632	-0.0417998	-0.163558	-0.34379	-0.0623829	0.124093		YKR054C	YKR054C ... DYN1 mitotic sister chromatid segre motor activity cytoplasmic microtubule* | YKR055W	#N/A	#N/A	#N/A	#N/A	#N/A
YBR236C	YBR236C ... ABD1 mRNA capping mRNA (guanine-N7-)-methyltransferasnucleus* | YBR237W	yes	.		0.127933	-0.28067	0.220702		-0.153998	-0.832459	0.311303	-0.828732		-1.54596	-0.55924	-0.316795	-0.530673		0.156259	-1.47652	-0.113613	0.399368		-0.0271734	0.354074	0.281588		-0.540211	0.277334	0.471319		0.592991	0.424761	0.589314		0.172644	-0.0172399	0.0683761	-0.317329	0.290155	-0.00463855		YBR236C	YBR236C ... ABD1 mRNA capping mRNA (guanine-N7-)-methyltransferasnucleus* | YBR237W	-0.043163	-0.29859	-0.154583	0	-0.015365
YLR105C	YLR105C ... SEN2 tRNA splicing tRNA-intron endonuclease activity mitochondrial outer membrane* | YLR106C	yes	.		1.16435	0.989778	0.942059		1.34446	0.702921	1.14432	0.443901		-0.393956	-0.492974	-1.14491	-0.309387		-0.357792	-0.23836	-0.435332	0.342695		-0.0265084	-0.026618	-0.0498303		-0.0134771	0.0508866	0.0556719		0.17193	-0.0889289	0.00163691		-0.0713928	0.0350689	0.114143	-1.30281	0.14202	0.0456304		YLR105C	YLR105C ... SEN2 tRNA splicing tRNA-intron endonuclease activity mitochondrial outer membrane* | YLR106C	0.508124	0.476262	0.327133	0	0.075299
YBR009C	YBR009C ... HHF1 chromatin assembly or disassem DNA binding nuclear nucleosome | YBR010W	yes	.		-0.293899	-0.135017	-0.387088		-1.10911	-1.24841	-0.614855	-1.1457		-1.69938	-0.746834	-0.269906	-0.440191		-0.40562	-0.20904	-0.277687	-0.240891		-0.688602	-0.437061	-0.363859		-0.997828	0.258283	0.299463		0.0240931	0.0553809	0.0547809		-0.476982	-0.402358	-0.794836	-1.25714	0.123021	0.170753		YBR009C	YBR009C ... HHF1 chromatin assembly or disassem DNA binding nuclear nucleosome | YBR010W	#N/A	#N/A	#N/A	#N/A	#N/A
YMR195W	YMR195W ... ICY1 biological process unknown molecular function unknown vacuolar membrane (sensu Fungi) | YMR196W	yes	.		-1.42248	-0.168961	-0.53269		-2.47593	-1.55057	-1.76257	-1.55274		-2.38246	-0.585896	-0.922516	-0.844089		0.52399	0.0380533	0.257511	-0.372244		-0.868507	-0.124229	-1.50861		-0.855475	-0.52765	-0.739426		-0.0284975	-0.737717	0.00163691		-0.982446	-0.415244	-1.13131	-1.11671	-0.611012	-0.473988		YMR195W	YMR195W ... ICY1 biological process unknown molecular function unknown vacuolar membrane (sensu Fungi) | YMR196W	#N/A	#N/A	#N/A	#N/A	#N/A
YML098W	YML098W ... TAF13 transcription initiation from general RNA polymerase II transcripnucleus* | YML099C	yes	.		-0.140539	-0.58537	-0.29665		-0.791428	1.47497	-0.189678	-0.911194		-1.06053	1.28352	-0.852127	-0.320527		0.424455	-0.324517	-0.0136636	-0.554359		-0.584639	-0.0462263	0.332693		0.439981	0.10978	0.445929		0.89146	0.880274	0.190082		-0.328771	0.304256	-0.596932		0.188514	0.126742		YML098W	YML098W ... TAF13 transcription initiation from general RNA polymerase II transcripnucleus* | YML099C	-1.46564	-1.7513	-0.251815	0	-2.05699
YNL085W	YNL085W ... MKT1 viral life cycle nuclease activity cytoplasm* | YNL086W	yes	.		-0.439909	-0.253286	-0.338679		-0.117102	-0.163608	-0.0715158	-0.372328		-0.234533	-0.0260774	-0.0354052	-0.284605		-0.152236	-0.132273	-0.295905	0.0780745		0.292107	0.174499	0.0239633		0.0125594	0.147418	0.0699215		-0.0504084	-0.00617332	0.0809069		0.103417	-0.115167	-0.205316	-0.431631	-0.214365	-0.249586		YNL085W	YNL085W ... MKT1 viral life cycle nuclease activity cytoplasm* | YNL086W	-0.122949	-0.121936	0.088998	0	0.028034
YPL049C	YPL049C ... DIG1 invasive growth (sensu Sacchar DNA binding* nucleus | YPL050C	yes	.		-0.048728	-0.505957	-0.54343		0.0585469	-0.499405	-0.131535	-0.677208		-0.545959	-1.36811	-1.35038	-1.1581		-0.536551	-0.496984	-0.473195	-0.173626		-0.438197	-0.381387	-0.293805		-0.0614171	0.000598524	0.11111		0.278667	0.453168	0.256356		-0.414443	-0.213297	0.471589	0.0092584	-0.0753655	0.00216802		YPL049C	YPL049C ... DIG1 invasive growth (sensu Sacchar DNA binding* nucleus | YPL050C	-0.027102	-0.029402	-0.197393	0	0.102476
YGR197C	YGR197C ... SNG1 response to drug molecular function unknown membrane | YGR198W	yes	.		-0.664502	-0.621896	-0.506694		-0.50884	-0.29762	-0.630777	-0.126923		0.276503	0.486683	0.431666	0.330282		0.768409	0.338448	0.475416	0.0543814		0.0610778	0.306406	-0.324079		0.439981	0.0780715	0.12922		0.0831905	-0.026293	0.350971		0.243881	-0.0968427	0.329649	0.890275	0.543598	0.725644		YGR197C	YGR197C ... SNG1 response to drug molecular function unknown membrane | YGR198W	#N/A	#N/A	#N/A	#N/A	#N/A
YPL075W	YPL075W ... GCR1 positive regulation of transcr DNA binding* nucleus | YPL076W	yes	.		-0.418263	-0.152443	-0.415835		-0.605209	-0.288331	-0.18035	-0.780798		-0.767582	-0.487393	-1.39919	-0.877369		-0.505156	-0.287042	-0.370748	0.0402865		-0.300226	0.199513	-0.168959		-0.358833	0.0421105	-0.184047		0.328708	0.0282443	0.262401		0.111903	-0.353743	0.641385	0.258072	-0.243136	-0.398011		YPL075W	YPL075W ... GCR1 positive regulation of transcr DNA binding* nucleus | YPL076W	-0.050759	-0.38014	-1.08998	0	0.12141
YJR134C	YJR134C ... SGM1 biological process unknown molecular function unknown Golgi apparatus* | YJR135C	yes	.		0.168373	-0.186812	-0.493585		-0.263915	-0.412556	0.351449	-0.922082		-0.907415	-0.0779366	-0.778127	-0.404516		0.272452	-1.32452	-0.174981	0.572993		-0.0117395	0.26178	0.0348214		-0.0658223	0.407697	0.277715		0.794625	0.510285	0.517723		0.0677297	0.153946	0.867873	0.549976	0.195813	0.389346		YJR134C	YJR134C ... SGM1 biological process unknown molecular function unknown Golgi apparatus* | YJR135C	-0.228599	-0.468811	-0.275792	0	0.164404
YMR257C	YMR257C ... PET111 protein biosynthesis translation regulator activity mitochondrial inner membrane | YMR258C	yes	.		-0.496241	-0.619914	-0.550298		-0.427016	-1.19246	-0.52582	-0.695465		-0.596585	-0.816016	-0.299586	-0.649385		0.0433645	-0.0721296	-0.184482	0.198549		-0.0948702	0.0992772	-0.0526515		-0.651762	0.24475	-0.00601047		0.0150305	-0.133646	-0.104672		-0.332604	-0.293257	-0.438398	-1.41333	-0.198429	-0.135016		YMR257C	YMR257C ... PET111 protein biosynthesis translation regulator activity mitochondrial inner membrane | YMR258C	#N/A	#N/A	#N/A	#N/A	#N/A
YPL189C-A	YPL189C-A Ö COA2 biological process unknown molecular function unknown | Cytochrome oxidase assembly factor; null mutation results in respiratory deficiency with specific loss of cytochrome oxidase activity; functions downstream of assembly factors Mss51p and Coa1p and interacts with assembly factor Shy1pYPL189W	yes	.		-0.799519	-0.860249	-0.667242		-1.32814	-1.33239	-1.11487	-1.27857		-0.482597	0.213131	-1.65948	0.228828		0.0834178	0.177984	0.436748	0.130256		-0.336489	-0.432982	-0.522359		-0.434488	0.258755	-0.130821		-0.470735	-0.0711668	-0.66974		-0.00209818	-0.405504	0.766577	-0.256114	0.628035	0.242219		YPL189C-A	YPL189C-A Ö COA2 biological process unknown molecular function unknown | Cytochrome oxidase assembly factor; null mutation results in respiratory deficiency with specific loss of cytochrome oxidase activity; functions downstream of assembly factors Mss51p and Coa1p and interacts with assembly factor Shy1pYPL189W	#N/A	#N/A	#N/A	#N/A	#N/A
YGR279C	YGR279C ... SCW4 conjugation with cellular fusi glucosidase activity cell wall (sensu Fungi) | YGR280C	yes	.		-0.212748	-0.128723	0.147995		-0.472153	-0.548372	-0.490488	-0.207901		-0.0300463	-0.134348	0.0430501	-0.0585926		0.0135977	0.137941	0.120923	-0.096829		0.182383	0.0798753	0.0377244		0.0959148	-0.26781	-0.321411		-0.470556	-0.460403	-0.547158		0.0115907	0.13196	0.0290901	0.270591	0.307363	0.188842		YGR279C	YGR279C ... SCW4 conjugation with cellular fusi glucosidase activity cell wall (sensu Fungi) | YGR280C	-0.174577	-0.301543	-0.343197	0	0.007294
YCL051W	YCL051W ... LRE1 cell wall organization and bio transcription regulator activity* cell wall (sensu Fungi) | YCL052C	yes	.		-0.054226	0.103805	-0.401975		-0.172857	0.0487044	0.0447876	-0.508031		-0.0793909	-0.25522	0.0435363	-0.752459		0.153807	-0.37032	-0.0849852	0.116514		0.306941	0.00635529	-0.237434		-0.290412	-0.0531111	-0.427356		-0.162734	-0.0541068	0.164575		-0.290273	0.150968	-0.840453	-0.140215	-0.242601	-0.337268		YCL051W	YCL051W ... LRE1 cell wall organization and bio transcription regulator activity* cell wall (sensu Fungi) | YCL052C	0.045163	-0.600185	0.401442	0	-0.033837
YPL020C	YPL020C ... ULP1 G2/M transition of mitotic cel cysteine-type peptidase activity* nuclear pore* | YPL021W	yes	.		0.274862	0.039788	-0.130615		0.708499	-0.247497	-0.284918	-0.473789		-0.327318	-0.410377	-1.06936	-0.641149		-0.596304	0.46208	-0.351383	-0.165793		0.27837	0.285162	0.0321104		0.171492	0.757753	0.466994		0.736116	0.622135	0.692616		0.352514	0.00312604	1.46179	0.981244	0.557824	0.382592		YPL020C	YPL020C ... ULP1 G2/M transition of mitotic cel cysteine-type peptidase activity* nuclear pore* | YPL021W	0.16866	-0.033256	-0.147686	0	0.350509
YBL052C	YBL052C ... SAS3 chromatin silencing at telomer histone acetyltransferase activity*histone acetyltransferase complex* | YBL053W	yes	.		-0.335467	-0.226747	-0.431437		-0.30424	-0.726665	0.0313671	-0.785663		-0.760972	-0.754615	-2.28509	-0.447803		-0.0262067	-1.18701	-0.647768	0.436671		0.0168646	0.288634	0.18862		0.433438	0.646775	0.188031		0.23532	0.0932065	-0.0731309		-0.170671	-0.39577	-0.840325	-1.68061	-0.474806	-0.430206		YBL052C	YBL052C ... SAS3 chromatin silencing at telomer histone acetyltransferase activity*histone acetyltransferase complex* | YBL053W	0.148105	0.128846	0.049908	0	0.070673
YER161C	YER161C ... SPT2 negative regulation of transcr DNA binding nucleus | YER162C	yes	.		0.327595	-0.055531	-0.308621		-0.118894	0.261975	0.146071	-0.634354		-2.14091	-0.125871	0.273404	-1.32053		0.215868	-0.614023	-0.0480315	0.0492197		-0.024121	0.310399	0.0652758		-0.252591	0.566868	0.393841		0.654052	0.278536	0.522168		0.0287811	-0.219928	-0.214718	-0.684648	-0.0775578	-0.0517721		YER161C	YER161C ... SPT2 negative regulation of transcr DNA binding nucleus | YER162C	-0.558243	-0.404103	0.207766	0	-0.859753
YBL043W	YBL043W ... ECM13 cell wall organization and bio molecular function unknown cellular component unknown | YBL044W	yes	.		-0.303046	-2.24779	0.985903		-1.96135		-0.27714	0.0888058			-0.0384082		0.271388		0.00941721		-0.511163	-0.31335		0.0498796	-0.912725	-0.562502		0.31445	0.394348	0.379341		0.223041	1.23581	0.437736		0.718926	0.540304	1.92817	1.35955	2.34205	1.19491		YBL043W	YBL043W ... ECM13 cell wall organization and bio molecular function unknown cellular component unknown | YBL044W	#N/A	#N/A	#N/A	#N/A	#N/A
YOR191W	YOR191W Ö ULS1 (RIS1) aerobic respiration* molecular function unknown cytoplasm | RING finger protein involved in proteolytic control of sumoylated substrates; interacts with SUMO (Smt3p); member of the SWI/SNF family of DNA-dependent ATPases; plays a role in antagonizing silencing during mating-type switchingYOR192C	yes	.		-0.379049	-0.220438	-0.470622		-0.0405794	-0.34521	0.00839341	-0.230774		-1.14642	-0.399156	-1.85727	-0.411391		-0.436984	-0.280123	-0.514678	-0.0270462		-0.197459	0.145577	-0.0363091		-0.597603	0.250604	0.193022		0.327858	0.113172	0.276185		-0.338492	-0.102253	-0.212317	-0.685167	0.732926	0.996904		YOR191W	YOR191W Ö ULS1 (RIS1) aerobic respiration* molecular function unknown cytoplasm | RING finger protein involved in proteolytic control of sumoylated substrates; interacts with SUMO (Smt3p); member of the SWI/SNF family of DNA-dependent ATPases; plays a role in antagonizing silencing during mating-type switchingYOR192C	0.189634	-0.173622	-0.425587	0	0.138762
YFL046W	YFL046W ... FMP32 biological process unknown molecular function unknown mitochondrion | YFL047W	yes	.		0.233439	0.281184	-0.060834		0.62361	-1.10999	-0.308849	-0.277976		0.717076	-0.190411	-0.468798	-0.713965		0.298924	1.10844	-0.266051	0.0825783		-0.0623299	0.00130206	-1.08628		0.507095	0.39143	-0.423295		0.125137	0.0909147	1.06218		-0.138852	0.0902105	0.068225	-0.690011	0.481663	0.575345		YFL046W	YFL046W ... FMP32 biological process unknown molecular function unknown mitochondrion | YFL047W	0.707465	0.511877	0.299234	0	0.393528
YLR067C	YLR067C ... PET309 protein biosynthesis* translation regulator activity integral to membrane* | YLR068W	yes	.		0.593816	0.579195	0.491591		0.32244	0.643367	0.696059	0.125148		-1.02221	0.324162	-0.878927	-0.548906		0.124894	-0.37427	-0.474074	0.0908803		-0.103033	-0.0897404	-0.20291		0.107598	0.176366	-0.0604563		0.306606	0.0757916	-0.060729		-0.16455	-0.0640643	-0.558495	-0.686259	0.128933	0.14911		YLR067C	YLR067C ... PET309 protein biosynthesis* translation regulator activity integral to membrane* | YLR068W	#N/A	#N/A	#N/A	#N/A	#N/A
YIL035C	YIL035C ... CKA1 protein amino acid phosphoryla protein kinase CK2 activity protein kinase CK2 complex | YIL036W	yes	.		0.209398	0.10334	-0.196977		-0.115386	-0.359021	0.138764	-0.802941		-0.745403	-0.752104	-0.323748	-0.590257		-0.233439	-0.803685	-0.835259	0.0929699		-0.00156279	0.210038	-0.20792		-0.0671413	0.418243	0.279251		0.248458	0.292709	0.523954		0.115148	-0.314468	-0.260156	-0.768999	-0.199042	-0.0664664		YIL035C	YIL035C ... CKA1 protein amino acid phosphoryla protein kinase CK2 activity protein kinase CK2 complex | YIL036W	0.168846	-0.02695	0.300806	0	-0.133333
YAR008W	YAR008W ... SEN34 tRNA splicing tRNA-intron endonuclease activity mitochondrial outer membrane* | YAR014C	yes	.		0.393289	0.428135	0.053719		0.660136	0.112399	1.07336	-0.688802		-0.108895	-0.163939	-1.17406	-0.174023		-0.505156	-1.22498	-0.183589	0.607215		0.208577	-0.036766	0.0920715		1.2805	0.615308	0.368215		-0.267945	0.455777	-0.056466		-0.0180397	-0.751224	-0.498724	-1.31804	-0.175132	-0.586509		YAR008W	YAR008W ... SEN34 tRNA splicing tRNA-intron endonuclease activity mitochondrial outer membrane* | YAR014C	#N/A	#N/A	#N/A	#N/A	#N/A
YHR080C	YHR080C ... YHR080C biological process unknown molecular function unknown mitochondrion | YHR081W	yes	.		-0.442632	-0.531553	-0.386529		-0.509657	-0.496052	-0.0968735	-0.671682		-1.20046	-0.0894824	-0.742249	-0.303885		0.0248472	-0.221706	-0.325213	0.155037		1.13262	1.03934	1.02648		0.177652	0.236766	0.269367		0.480722	0.559121	0.569436		0.674482	0.661728	0.745706	-0.0422574	1.40505	1.42902		YHR080C	YHR080C ... YHR080C biological process unknown molecular function unknown mitochondrion | YHR081W	#N/A	#N/A	#N/A	#N/A	#N/A
YDR309C	YDR309C ... GIC2 establishment of cell polarity small GTPase regulator activity bud tip* | YDR310C	yes	.		-0.055198	-0.034209	-0.012624		-0.507841	-0.579479	-0.747175	-0.487544		-0.907415	-0.684771	-0.773373	-1.01165		0.0282762	0.104327	0.240566	-0.0654229		0.333948	0.340323	0.155104		-1.0347	-0.265511	-0.328981		-0.130068	-0.171331	-0.255056		-0.245095	-0.360368	0.202944	0.529262	0.399793	0.398578		YDR309C	YDR309C ... GIC2 establishment of cell polarity small GTPase regulator activity bud tip* | YDR310C	-0.964912	-0.994063	-0.709764	0	-0.279026
YNR044W	YNR044W ... AGA1 agglutination during conjugati cell adhesion molecule binding cell wall (sensu Fungi) | YNR045W	yes	.		0.171493	0.796606	1.07079		-0.858259	-0.500783	-1.26863	-1		-0.493491	-0.397489	-1.60915	-0.701944		0.399364	-0.187013	0.699054	0.381795		0.757098	-0.124229	0.186536		2.09206	0.47235	-0.0211969		0.840918	0.488792	0.171562		0.010581	0.0686215	-0.300178	0.389777	0.544246	0.340623		YNR044W	YNR044W ... AGA1 agglutination during conjugati cell adhesion molecule binding cell wall (sensu Fungi) | YNR045W	#N/A	#N/A	#N/A	#N/A	#N/A
YOR047C	YOR047C ... STD1 regulation of transcription fr protein kinase activator activity nucleus* | YOR048C	yes	.		-0.200269	-0.331255	-0.642097		-0.333321	-0.0359927	0.0972551	-0.574159		-1.45285	-0.286336	-0.0220521	-0.325488		-0.708812	-0.891557	-0.457224	0.0674714		-0.261607	-0.043541	-0.309036		-0.305159	0.0615624	-0.0487827		0.374351	0.288365	0.430095		-0.117309	-0.0236251	-0.2171	-0.541367	0.683659	0.722845		YOR047C	YOR047C ... STD1 regulation of transcription fr protein kinase activator activity nucleus* | YOR048C	#N/A	#N/A	#N/A	#N/A	#N/A
YPL244C	YPL244C ... HUT1 UDP-galactose transport UDP-galactose transporter activity cellular component unknown | YPL245W	yes	.		-0.168232	-0.026243	0.260318		-0.0393552	0.16929	-0.0901419	0.140336		0.0134687	-0.139946	-0.144909	-0.0711798		0.243214	-0.0614823	-0.0760601	0.251791		-0.0340429	0.00248411	-0.113024		-0.862582	-0.146109	-0.442493		-0.33274	-0.39627	-0.227497		0.11465	0.00975784	1.29836	1.62745	-0.271557	-0.127538		YPL244C	YPL244C ... HUT1 UDP-galactose transport UDP-galactose transporter activity cellular component unknown | YPL245W	#N/A	#N/A	#N/A	#N/A	#N/A
YKR022C	YKR022C Ö NTR2 nuclear mRNA splicing, via spl molecular function unknown | Essential protein that forms a dimer with Ntr1p; also forms a trimer, with Ntr2p and the DExD/H-box RNA helicase Prp43p, that is involved in spliceosome disassemblyYKR023W	yes	.		0.278518	0.009064	-0.095017		-0.0988562	0.112399	0.523955	-0.911194		-0.00539036	-0.301443	-1.57459	-0.64615		0.59438	-1.54691	-0.449763	0.327107		-0.0538683	0.298983	0.498364		-0.644908	0.749884	0.661063		0.421879	0.413504	0.546633		-0.140212	-0.232215	-0.247604	-0.773721	-0.202736	-0.418979		YKR022C	YKR022C Ö NTR2 nuclear mRNA splicing, via spl molecular function unknown | Essential protein that forms a dimer with Ntr1p; also forms a trimer, with Ntr2p and the DExD/H-box RNA helicase Prp43p, that is involved in spliceosome disassemblyYKR023W	0.687327	-0.197269	0.721899	0	0.328157
YNL076W	YNL076W ... MKS1 regulation of nitrogen utiliza transcriptional repressor activity intracellular | YNL077W	yes	.		0.333534	-0.075825	-0.001515		0.0734127	-0.185942	0.276113	-0.566546		-1.13798	-0.679954	-0.731833	-1.05484		-0.253617	-1.24857	-0.37528	-0.0205687		0.17109	-0.0873292	-0.048922		0.0132802	0.260715	0.34231		0.106648	0.303654	0.509241		-0.182861	-0.0918432	-0.458869	0.122397	-0.278553	0.440548		YNL076W	YNL076W ... MKS1 regulation of nitrogen utiliza transcriptional repressor activity intracellular | YNL077W	0.108424	-0.028047	-0.174346	0	0.155305
YIL112W	YIL112W ... HOS4 histone deacetylation* NAD-dependent histone deacetylase ahistone deacetylase complex | YIL113W	yes	.		-0.1399	-0.210183	-0.407781		-0.174346	-0.59542	0.231666	-0.547382		-0.633422	-0.182798	-0.0847878	-0.600288		-0.40562	-0.254127	-0.445275	0.501435		-0.300003	0.23624	-0.121586		-0.240678	0.281804	0.301899		0.658144	0.232536	0.738603		0.182326	0.0305815	0.169831	-0.638664	0.178753	0.0862279		YIL112W	YIL112W ... HOS4 histone deacetylation* NAD-dependent histone deacetylase ahistone deacetylase complex | YIL113W	-0.040031	-0.42621	-0.500116	0	0.241071
YLR227C	YLR227C ... ADY4 sporulation structural molecule activity spindle pole body | YLR228C	yes	.		1.67443	1.9603	1.60329		1.32815	0.518038	2.22699	0.888507		-1.45285	-1.91288	0.769361	-0.991646		-0.280089	-0.242055	-0.0480315	0.086257		0.57956	0.257642	0.186536		-1.34852	0.515419	0.134922		0.0303962	0.0345125	-0.110838		-0.295721	-0.137112	0.143647	-1.33011	-0.221488	0.168219		YLR227C	YLR227C ... ADY4 sporulation structural molecule activity spindle pole body | YLR228C	#N/A	#N/A	#N/A	#N/A	#N/A
YAL020C	YAL020C ... ATS1 budding cell bud growth* molecular function unknown cytoplasm | YAL021C	yes	.		-0.070385	0.096166	0.274665		0.0771214	0.268518	-0.317782	0.249271		-0.0329461	0.264155	-0.593209	-0.0478904		0.316079	0.184497	0.164264	-0.135013		-0.0445734	0.0704186	0.400516		-0.833942	-0.0195027	-0.180675		-0.00777527	-0.170228	-0.38831		0.00544863	0.513903	-0.42751	0.0221869	0.351979	0.732024		YAL020C	YAL020C ... ATS1 budding cell bud growth* molecular function unknown cytoplasm | YAL021C	#N/A	#N/A	#N/A	#N/A	#N/A
YDR152W	YDR152W PAC cluster GIR2 biological process unknown molecular function unknown cytoplasm | YDR153C	yes	.		0.315376	0.310371	-0.06587		0.1469	-0.650562	0.246086	-0.422694		-1.18048	-0.680856	-1.49213	-0.602408		-0.388342	-0.341005	-0.376713	-0.0161902		-0.178772	0.0868778	0.285122		-0.560019	0.0718125	0.285464		0.432834	0.188203	0.0954733		-0.156529	-0.19251	-0.384242	-0.808655	-0.154373	-0.245972		YDR152W	YDR152W PAC cluster GIR2 biological process unknown molecular function unknown cytoplasm | YDR153C	0.412956	0.778768	0.358236	0	0.065968
YMR190C	YMR190C ... SGS1 mitotic sister chromatid segre ATP-dependent DNA helicase activitynucleolus* | YMR191W	yes	.		-0.151904	-0.245361	-0.447292		-0.407417	-0.0655992	-0.136382	-0.732025		-1.21302	-0.546555	-0.160676	-0.355154		0.0708177	-0.292095	-0.0961258	0.246829		0.218508	0.291796	0.151816		0.0294728	0.428203	0.433169		0.458943	0.299366	0.511549		0.143947	-0.00247544	0.22914	-0.053905	0.166027	0.0769192		YMR190C	YMR190C ... SGS1 mitotic sister chromatid segre ATP-dependent DNA helicase activitynucleolus* | YMR191W	0.35979	0.004388	-0.464889	0	0.307375
YKL166C	YKL166C ... TPK3 protein amino acid phosphoryla protein serine/threonine kinase actcytoplasm* | YKL167C	yes	.		0.192113	0.116486	-0.183309		0.265418	0.183738	-0.121571	-0.619731		-1.61512	-1.29216	-1.60345	-0.551527		-0.602018	-1.08059	-0.128547	0.235988		-0.00966232	0.386733	-0.0144724		-0.0211533	0.209316	0.188031		0.393382	0.0795832	0.33026		0.347137	0.184079	-0.380755	-0.600644	0.180362	-0.0556172		YKL166C	YKL166C ... TPK3 protein amino acid phosphoryla protein serine/threonine kinase actcytoplasm* | YKL167C	-0.366533	0.141214	0.017197	0	-0.383828
YNL032W	YNL032W ... SIW14 endocytosis* protein tyrosine phosphatase activicytoplasm | YNL033W	yes	.		-0.040012	0.557921	-0.114606		0.0892734	0.890007	0.0898755	-0.535685		-1.50532	0.224626	-0.507479	-0.375823		-0.456246	-0.47652	0.0107894	0.368474		0.21765	-0.0807272	0.139742		-0.163598	0.0408624	0.306857		0.259254	0.653702	0.255394		0.0454267	-0.134856	0.410326	-0.763074	0.346394	0.152668		YNL032W	YNL032W ... SIW14 endocytosis* protein tyrosine phosphatase activicytoplasm | YNL033W	0.782119	0.776998	0.561966	0	0.608483
YPR087W	YPR087W Ö VPS69 | Dubious open reading frame, unlikely to encode a protein; not conserved in closely related Saccharomyces species; 85% of ORF overlaps the verified gene SRP54; deletion causes a vacuolar protein sorting defectYPR088C	yes	.		-1.04001																			1.56445		1.57885			0.887388	0.978803		-2.40701		0.416674		0.526281	0.0350689	0.902639	3.99181	1.16755	2.24222		YPR087W	YPR087W Ö VPS69 | Dubious open reading frame, unlikely to encode a protein; not conserved in closely related Saccharomyces species; 85% of ORF overlaps the verified gene SRP54; deletion causes a vacuolar protein sorting defectYPR088C	#N/A	#N/A	#N/A	#N/A	#N/A
YFL023W	YFL023W PAC cluster BUD27 bud site selection molecular function unknown cytoplasm | YFL024C	yes	.		0.181404	-0.125082	-0.505883		-0.266207	-0.472563	0.0447876	-0.560029		-0.867887	-0.748902	-0.456198	-0.962409		-0.618614	-0.739554	-0.511163	-0.114042		0.112566	0.25192	0.241445		-0.839356	0.185797	0.140016		0.422974	0.211644	0.355534		0.460692	0.359071	0.136761	-0.957203	0.120066	0.205427		YFL023W	YFL023W PAC cluster BUD27 bud site selection molecular function unknown cytoplasm | YFL024C	0.099198	-0.028324	0.028851	0	-0.102921
YGR167W	YGR167W ... CLC1 endocytosis* structural molecule activity clathrin vesicle coat | YGR168C	yes	.		-0.002209	-0.340211	-0.479405		-0.615177	-0.32076	0.133256	-1.23769		-1.32427	-1.13995	-0.92823	-0.94493		0.028526	-1.21529	-0.530964	0.338726		-0.173327	-0.013543	-0.0727579		0.473758	0.440918	0.507312		0.682177	0.638267	0.796759		-0.0733882	-0.140626	-0.377469	-0.349084	0.301062	0.122198		YGR167W	YGR167W ... CLC1 endocytosis* structural molecule activity clathrin vesicle coat | YGR168C	-0.718746	-0.301016	-0.391103	0	-0.649841
YOL006C	YOL006C ... TOP1 regulation of transcription fr DNA topoisomerase type I activity nucleus | YOL007C	yes	.		0.076573	-0.056498	-0.328572		0.0184694	-0.368305	0.370663	-0.0459436		-1.23046	-0.576828	-0.260592	-0.0204176		-0.412409	-0.41198	-0.524363	0.0503402		0.121338	0.157285	0.267215		-0.121247	0.168902	0.340881		0.303691	0.216446	0.345369		0.0699025	0.0561746	-0.0180722	-0.256114	1.0092	0.922188		YOL006C	YOL006C ... TOP1 regulation of transcription fr DNA topoisomerase type I activity nucleus | YOL007C	0.769783	0.72498	0.309477	0	0.595824
YPR173C	YPR173C ... VPS4 protein-Golgi retention* ATPase activity cytoplasm* | YPR174C	yes	.		0.037118	0.00839	-0.233015		-0.616217	-0.452386	0.0982269	-0.227056		-0.867887	-0.573445	-0.843082	-0.218503		0.127254	-0.903053	-0.353924	0.0503402		0.0598499	0.371358	-0.0155076		-0.202126	0.606916	0.412456		0.182583	0.139629	0.347875		-0.144838	0.154958	0.759899	0.713153	-0.0810002	-0.0654206		YPR173C	YPR173C ... VPS4 protein-Golgi retention* ATPase activity cytoplasm* | YPR174C	0.130667	0.023989	-0.097465	0	0.203117
YNL254C	YNL254C Ö RTC4 biological process unknown molecular function unknown | Protein of unknown function; null mutation suppresses cdc13-1 temperature sensitivity; (GFP)-fusion protein localizes to both the cytoplasm and the nucleusYNL255C	yes	.		0.321587	-0.132621	-0.330197		0.0386473	0.153041	0.170319	-0.664554		-2.2602	-0.190411	-0.574593	-0.600028		-0.797938	-1.32452	-0.266051	0.390257		-0.242902	0.0847181	-0.0658151		0.954554	0.190457	0.308509		0.979049	0.195262	0.620074		-0.00209818	-0.12999	-0.00425169	-1.21764	0.384992	0.354694		YNL254C	YNL254C Ö RTC4 biological process unknown molecular function unknown | Protein of unknown function; null mutation suppresses cdc13-1 temperature sensitivity; (GFP)-fusion protein localizes to both the cytoplasm and the nucleusYNL255C	-0.3013	-0.621512	-0.456768	0	-0.23845
YGL090W	YGL090W ... LIF1 double-strand break repair via structural molecule activity nucleus | YGL091C	yes	.		0.368794	-0.496176	-0.592173		0.164178	-0.457917	0.585356	-0.821927		-1.32732	-2.2608	-0.989631	-1.37631		0.672382	0.122942	-0.703808	0.328196		0.280999	0.364058	0.679018		-0.725079	0.524818	0.715769		0.408458	0.259423	0.302296		-0.370626	0.103456	-0.117539	0.112668	0.290411	0.110307		YGL090W	YGL090W ... LIF1 double-strand break repair via structural molecule activity nucleus | YGL091C	#N/A	#N/A	#N/A	#N/A	#N/A
YKL051W	YKL051W ... SFK1 actin cytoskeleton organizatio molecular function unknown plasma membrane | YKL052C	yes	.		-0.184401	-0.065467	0.089238		0.513985	0.0550659	-0.0916746	0.260124		0.693424	0.0737022	0.356059	0.220314		-0.0820058	-0.042117	0.00874335	0.0621587		-0.506291	-0.584326	-0.926256		-0.989884	-0.189137	-0.537447		-0.318672	-0.026345	-0.0132364		-0.52335	-0.549894	0.46654	0.57035	0.655965	0.807816		YKL051W	YKL051W ... SFK1 actin cytoskeleton organizatio molecular function unknown plasma membrane | YKL052C	#N/A	#N/A	#N/A	#N/A	#N/A
YGR170W	YGR170W ... PSD2 phosphatidylcholine biosynthes phosphatidylserine decarboxylase acvacuolar membrane (sensu Fungi)* | YGR171C	yes	.		-0.283417	-0.424417	-0.320632		-0.961353	0.131015	-0.281573	-0.308714		-1.66759	-0.534366	-0.709002	-0.644263		0.262183	-0.674459	-0.164297	-0.109555		0.116994	-0.0561398	-0.000695382		-0.329406	0.0447442	0.194984		0.536145	0.459372	0.537131		-0.0108051	-0.255495	-0.226921	-0.667984	-0.035496	-0.0876577		YGR170W	YGR170W ... PSD2 phosphatidylcholine biosynthes phosphatidylserine decarboxylase acvacuolar membrane (sensu Fungi)* | YGR171C	#N/A	#N/A	#N/A	#N/A	#N/A
YPR120C	YPR120C ... CLB5 G1/S transition of mitotic cel cyclin-dependent protein kinase regnucleus | YPR121W	yes	.		-0.010386	-0.04456	-0.544867		-0.103372	-0.694956	0.170319	-0.911194		-1.16745	0.324162	0.0103694	-0.572493		-0.678639	-0.376984	-0.0663784	0.747191		-0.157083	0.0553206	-0.0514329		-0.732856	0.731517	0.297754		0.393753	0.278157	0.353939		0.0788218	0.135296	0.6468	0.779763	0.0261988	0.17856		YPR120C	YPR120C ... CLB5 G1/S transition of mitotic cel cyclin-dependent protein kinase regnucleus | YPR121W	#N/A	#N/A	#N/A	#N/A	#N/A
YNL039W	YNL039W ... BDP1 transcription initiation from RNA polymerase III transcription fatranscription factor TFIIIB complex | YNL040W	yes	.		-0.008302	-0.036616	-0.303603		-0.529636	-0.109993	0.224111	-0.56161		-1.29415	0.108433	0.189693	-0.654902		0.280719	-0.376984	-0.0961258	-0.0321687		0.211828	0.369053	0.0705124		0.136912	0.767693	0.451685		0.425609	0.29507	0.404183		0.366124	-0.0998607	0.12727	-0.815542	0.258703	0.173632		YNL039W	YNL039W ... BDP1 transcription initiation from RNA polymerase III transcription fatranscription factor TFIIIB complex | YNL040W	-0.118081	-0.238985	-0.258627	0	-0.086978
YDR084C	YDR084C ... TVP23 biological process unknown molecular function unknown cytoplasm | YDR085C	yes	.		-0.944554	-0.400214	-0.3058		-0.961353	-0.499036	-0.610222	-0.254496		0.0472243	0.0871227	0.0706299	0.181669		0.465097	0.116056	0.369167	0.205523		-0.0266619	-0.0450021	-0.110446		0.460301	0.142645	0.1574		-0.0012494	-0.0259026	0.0605306		-0.138116	-0.395565	0.182747	-0.284311	0.0269564	-0.139088		YDR084C	YDR084C ... TVP23 biological process unknown molecular function unknown cytoplasm | YDR085C	-0.288867	-0.351712	-0.268989	0	0.348242
YHR005C	YHR005C ... GPA1 signal transduction during con GTPase activity plasma membrane* | YHR005C-A	yes	.		1.63806	0.796606	-0.1516		-0.442243	-0.247497	0.153909	-0.632293		-1.64712	-0.912877	-0.411554	-0.836843		-0.665487	-1.37343	-0.803149	-0.455369		1.82749	2.3352	1.52441		0.577484	2.00287	1.45273		1.11655	1.119	1.49102		0.352307	0.154474	-0.180585	-0.102334	0.73647	0.593631		YHR005C	YHR005C ... GPA1 signal transduction during con GTPase activity plasma membrane* | YHR005C-A	-0.086352	0.132832	0.037411	0	-0.145783
YPR086W	YPR086W ... SUA7 transcription initiation from general RNA polymerase II transcripnucleoplasm | YPR087W	yes	.		0.32403	0.54044	0.015955		0.0175857	0.206034	0.435428	-0.157173		-1.58409	-0.295566	-1.0804	-0.159331		0.150773	-0.763401	-0.150832	0.308138		0.0184014	0.197699	0.15739		-0.280929	-0.0326885	0.023447		0.389335	0.369657	0.344029		-0.000467097	0.0350689	0.934117	0.794858	0.272286	0.285091		YPR086W	YPR086W ... SUA7 transcription initiation from general RNA polymerase II transcripnucleoplasm | YPR087W	-0.08295	0.151992	0.018644	0	-0.125407
YIL161W	YIL161W ... YIL161W biological process unknown molecular function unknown cytoplasm | YIL162W	yes	.		0.413899	0.692615	0.132703		-0.791428	-0.624566	-0.0927159	-0.868125		-1.28292	-0.360336	-1.57459	-0.0181185		0.0094172	-0.961947	-0.755089	0.847114		0.0201323	0.346662	0.309393		0.217588	0.546351	0.417687		0.528736	0.171072	0.653714		-0.281074	-0.0537403	-0.691722	-0.489313	-0.312635	0.385583		YIL161W	YIL161W ... YIL161W biological process unknown molecular function unknown cytoplasm | YIL162W	0.046594	0.070384	0.299297	0	-0.429513
YGL178W	YGL178W ... MPT5 cell wall organization and bio mRNA binding cytoplasm | YGL179C	yes	.		-0.044726	0.238326	0.222111		-0.108506	-0.0575259	-0.33105	-0.168582		-0.064284	-0.0207062	-0.572162	-0.188338		0.208101	0.234451	0.308615	0.274115		0.187531	0.120235	-0.0346216		-0.135076	-0.0549644	-0.0670916		-0.148407	-0.0725525	0.123083		0.163184	0.169304	0.655749	0.364326	0.434274	0.359997		YGL178W	YGL178W ... MPT5 cell wall organization and bio mRNA binding cytoplasm | YGL179C	0.030717	-0.467004	-0.146851	0	0.172316
YNL308C	YNL308C PAC cluster KRI1 ribosome biogenesis molecular function unknown nucleolus | YNL309W	yes	.		0.301896	0.437833	-0.50152		0.369853	0.112399	-0.0184062	-0.323008		-0.822083	-0.260801	-0.659482	-0.307535		-0.46863	-1.35426	-0.35486	-0.166509		-0.100473	0.0680267	0.0710908		-0.373606	0.117328	0.235214		0.360465	0.491097	0.340237		0.144305	-0.090462	-0.59425	-1.04061	-0.234395	-0.354816		YNL308C	YNL308C PAC cluster KRI1 ribosome biogenesis molecular function unknown nucleolus | YNL309W	-0.159517	-0.20621	0.122789	0	-0.427766
YEL023C	YEL023C ... YEL023C biological process unknown molecular function unknown cellular component unknown | YEL024W	yes	.		-0.21755	-0.022822	-0.138053		-0.339864	0.112399	-0.614175	-0.759191		-0.398402	0.28352	0.884839	-1.17607		0.494844	-0.224981	0.299803	0.469058		0.301418	-0.276232	-0.250034		0.636378	-0.264615	0.0719125		-0.00101673	0.103854	0.338672		0.0274749	-0.312854	-0.0322661	-0.400504	-0.31876	-0.0415739		YEL023C	YEL023C ... YEL023C biological process unknown molecular function unknown cellular component unknown | YEL024W	#N/A	#N/A	#N/A	#N/A	#N/A
YIL002C	YIL002C ... INP51 cell wall organization and bio inositol-polyphosphate 5-phosphatasmembrane fraction | YIL002W-A	yes	.		-0.443662	-0.464467	-0.614637		-0.665897	-0.448162	-0.234786	-0.794785		-0.901054	-0.549909	-0.422216	-0.546614		0.25453	-0.00804306	0.0256195	0.206804		0.0737702	-0.0446901	0.0371443		-0.119447	0.210484	0.177707		0.178831	0.109174	0.267712		-0.234532	-0.134344	0.0887653	-0.219691	-0.103258	0.135934		YIL002C	YIL002C ... INP51 cell wall organization and bio inositol-polyphosphate 5-phosphatasmembrane fraction | YIL002W-A	0.719393	0.198202	-0.942394	0	-0.125212
YDR528W	YDR528W ... HLR1 cell wall organization and bio molecular function unknown cytoplasm | YDR529C	yes	.		-0.032706	-0.079328	-0.076312		0.21922	0.127046	0.0273002	-0.98801		-0.867887	-0.145323	0.0947616	-0.898537		0.476543	-0.324517	0.204534	0.286562		-0.109319	0.47947	0.0194262		-1.58171	-0.112612	0.066266		0.277489	-0.112733	0.277271		-0.266924	0.0201957	0.335024	0.191838	-0.225927	0.16627		YDR528W	YDR528W ... HLR1 cell wall organization and bio molecular function unknown cytoplasm | YDR529C	-0.415742	-0.508534	-0.128643	0	-0.298852
YBR293W	YBR293W ... VBA2 basic amino acid transport multidrug transporter activity* vacuolar membrane (sensu Fungi) | YBR294W	yes	.		-0.296351	-0.135008	0.202831		0.0159272	-0.254383	-0.10289	0.161562		0.454041	0.670812	0.186347	0.289924		0.181884	0.556839	0.234415	0.153943		-0.106625	-0.0802855	0.304231		0.157945	0.0423626	0.504872		0.277489	-0.331942	0.12069		-0.363536	-0.238307	0.0338834	0.0589275	-0.273672	-0.0415739		YBR293W	YBR293W ... VBA2 basic amino acid transport multidrug transporter activity* vacuolar membrane (sensu Fungi) | YBR294W	#N/A	#N/A	#N/A	#N/A	#N/A
YPR113W	YPR113W ... PIS1 cell cycle* CDP-diacylglycerol-inositol 3-phospendoplasmic reticulum* | YPR114W	yes	.		-0.270045	-0.070854	0.349523		-0.189481	-0.129962	-0.144361	-0.0261802		0.14676	-0.173435	0.203014	0.0284026		0.0265583	0.0785324	0.139818	-0.0394517		-0.171697	-0.115667	-0.152007		0.478648	-0.118348	-0.186723		-0.0432608	-0.246205	-0.406917		-0.193653	-0.254438	0.523071	1.11124	0.0934429	-0.105251		YPR113W	YPR113W ... PIS1 cell cycle* CDP-diacylglycerol-inositol 3-phospendoplasmic reticulum* | YPR114W	0.435	0.48082	0.912562	0	0.744536
YJR089W	YJR089W ... BIR1 chromosome segregation molecular function unknown mitochondrion* | YJR090C	yes	.		-0.183801	-0.037008	-0.376127		-0.417032	-0.461466	0.57822	-0.607413		-1.36539	-0.855544	-0.456198	-0.44321		0.128062	-0.597535	-0.338327	-0.0472756		0.109939	0.13463	-0.0596899		-0.610143	0.35965	0.282584		0.471312	0.380267	0.583998		0.136334	-0.0453498	1.29616	0.786699	0.357032	0.0863482		YJR089W	YJR089W ... BIR1 chromosome segregation molecular function unknown mitochondrion* | YJR090C	0.217714	-0.797239	-0.255219	0	0.75879
YOR247W	YOR247W ... SRL1 nucleobase, nucleoside, nucleo molecular function unknown cytoplasm* | YOR248W	yes	.		-0.083733	0.456756	0.516618		-0.477506	-0.613258	-0.550029	-0.484263		0.228328	0.300536	-0.330429	0.290371		0.134289	0.546403	0.254107	0.331926		0.0950371	0.271999	0.263435		-0.0256829	0.518933	0.302966		-0.151718	0.0757916	-0.251228		0.0207528	0.146414	0.262181	-0.0984756	1.73766	1.38842		YOR247W	YOR247W ... SRL1 nucleobase, nucleoside, nucleo molecular function unknown cytoplasm* | YOR248W	#N/A	#N/A	#N/A	#N/A	#N/A
YER064C	YER064C ... YER064C regulation of transcription molecular function unknown nucleus | YER065C	yes	.		-0.242941	-0.380294	0.048699		-0.091233	-0.727906	-0.189247	-0.397933		0.00223288	-0.237717	-0.0229678	-0.477926		-0.371187	0.0451778	-0.260141	-0.0688124		-0.0312709	0.0471824	0.065241		0.298042	0.254116	0.26808		0.430619	0.15013	0.141103		-0.0235993	-0.0714307	-0.181914	-0.0992563	-0.134535	-0.00897663		YER064C	YER064C ... YER064C regulation of transcription molecular function unknown nucleus | YER065C	0.109008	-0.01745	-0.116566	0	0.292404
YOR231W	YOR231W ... MKK1 protein amino acid phosphoryla MAP kinase kinase activity bud tip | YOR232W	yes	.		-0.21116	-0.380124	-0.315662		-0.4695	-0.368728	0.163182	-0.0318756		-0.344325	-0.645066	-0.970772	-0.396037		0.298924	-0.154592	-0.429025	-0.0168191		0.0506572	0.176638	-0.0664815		-0.343081	0.333452	-0.197047		0.206685	0.0654615	0.27593		-0.0432517	-0.101177	-0.255698	-0.346989	1.07906	1.09208		YOR231W	YOR231W ... MKK1 protein amino acid phosphoryla MAP kinase kinase activity bud tip | YOR232W	-0.053046	-0.591899	-0.366797	0	0.064095
YOR174W	YOR174W ... MED4 transcription from RNA polymer RNA polymerase II transcription medmediator complex | YOR175C	yes	.		0.242576	0.172294	-0.037528		-0.309276	0.774529	0.0447876	-0.828732		-0.768351	0.65347	-0.899433	-0.983185		-0.057697	-1.15459	-0.167679	0.486351		-0.0336851	0.0684163	0.175498		-1.56002	0.0520186	0.17584		0.0293777	0.0651921	0.230662		0.018624	-0.1841	0.189737	0.232076	1.40387	1.18796		YOR174W	YOR174W ... MED4 transcription from RNA polymer RNA polymerase II transcription medmediator complex | YOR175C	-0.153286	-0.382483	-0.147465	0	-0.173587
YDL173W	YDL173W ... YDL173W biological process unknown molecular function unknown cytoplasm | YDL174C	yes	.		0.541411	-0.333213	-0.553217		-0.557997	-0.327585	-0.247393	-0.734316		-1.73462	-0.594802	-1.43709	-0.677265		0.266575	-0.121425	0.0573487	0.0830714		0.19443	0.0903652	-0.111558		-0.330885	0.0542852	-0.00225531		0.176934	0.35759	0.163181		0.171488	0.28949	0.0365934	-0.13747	0.453796	0.457232		YDL173W	YDL173W ... YDL173W biological process unknown molecular function unknown cytoplasm | YDL174C	-0.426397	-0.697327	-0.25527	0	-0.440929
YMR316C-A	YMR316C-A ... | YMR316C-B	yes	.		0.166439	1.21164	1.8484		0.62361		0.0447876	0.866413		-0.867887			-0.629076		-2.57555	-1.06148	0.318912	-0.728388		-1.75748	0.553843	-0.591071		0.899412	-0.43454	-1.60616		1.91492	-0.0417231	1.17156		2.26325	-2.28686	0.902639		2.16755	-2.07971		YMR316C-A	YMR316C-A ... | YMR316C-B	#N/A	#N/A	#N/A	#N/A	#N/A
YNL283C	YNL283C ... WSC2 cell wall organization and bio transmembrane receptor activity cytoplasm* | YNL284C	yes	.		-0.294561	0.043351	0.168075		-0.161025	-0.165586	-0.198107	0.0234925		0.303128	0.304193	0.369607	0.229394		0.1387	0.218626	0.264018	0.187548		0.0940663	-0.111376	0.219537		0.371852	0.227915	0.384857		0.151153	0.0535173	-0.0321778		-0.00640443	-0.108564	0.482268	0.388749	0.518365	0.30212		YNL283C	YNL283C ... WSC2 cell wall organization and bio transmembrane receptor activity cytoplasm* | YNL284C	-0.050138	-0.215142	-0.36409	0	-0.037364
YDR464W	YDR464W ... SPP41 negative regulation of transcr molecular function unknown nucleus | YDR465C	yes	.		-0.529362	-0.461258	-0.524874		-0.13969	-0.569425	-0.124089	-0.511107		-0.621726	-0.0604345	-1.63454	-0.334171		-0.355867	-0.37032	-0.422776	-0.173799		0.0765148	0.0656392	0.0334195		0.0863437	0.155697	0.243506		0.357679	0.152465	0.392096		0.0353618	-0.0264506	0.0617259	-0.242491	0.210272	0.255842		YDR464W	YDR464W ... SPP41 negative regulation of transcr molecular function unknown nucleus | YDR465C	0.162227	-0.074884	-0.085723	0	0.114943
YLR138W	YLR138W ... NHA1 monovalent inorganic cation ho cation:cation antiporter activity plasma membrane | YLR139C	yes	.		0.720856	1.05793	1.13639		1.06018	1.15007	0.963504	1.21407		-0.353314	-0.181861	-0.622121	-0.483533		-0.0312248	-0.0296118	0.0149055	-0.143315		0.114769	-0.00508156	0.0127501		0.0640749	-0.108795	-0.0881102		0.0180125	0.0277351	0.076678		0.353936	0.278312	0.300655	0.297821	0.388731	0.411246		YLR138W	YLR138W ... NHA1 monovalent inorganic cation ho cation:cation antiporter activity plasma membrane | YLR139C	0.802618	0.584466	0.695046	0	0.132603
YPL181W	YPL181W ... CTI6 positive regulation of transcr transcription factor binding nucleus | YPL182C	yes	.		0.330507	0.137832	-0.311343		-0.246755	0.259241	0.332364	-0.496157		-1.15329	0.131517	-0.295734	-0.547005		-0.0836922	-0.693751	-0.341882	0.149277		0.485381	0.0541084	0.218857		-0.270513	0.187897	0.502365		0.493092	0.432477	0.510025		0.253262	0.168851	1.19441	1.21337	0.664778	0.517854		YPL181W	YPL181W ... CTI6 positive regulation of transcr transcription factor binding nucleus | YPL182C	-0.41924	-0.343612	-0.347535	0	-0.181795
YBR068C	YBR068C ... BAP2 amino acid transport amino acid transporter activity plasma membrane | YBR069C	yes	.		0.07063	0.297013	0.51185		0.151781	0.16929	0.180044	0.3507		0.178044	0.0432756	0.217086	0.14578		0.059202	-0.0168384	-0.0983034	-0.0783863		0.0696989	-0.119785	-0.0452728		0.752486	0.41459	0.407084		-0.0480359	0.121036	0.0881301		-0.119085	-0.0400995	-0.275079	-0.163231	-0.238897	-0.186465		YBR068C	YBR068C ... BAP2 amino acid transport amino acid transporter activity plasma membrane | YBR069C	0.522865	0.855572	0.742348	0	0.181775
YOR014W	YOR014W ... RTS1 protein biosynthesis* protein phosphatase type 2A activitcytoplasm* | YOR015W	yes	.		-0.471833	-0.203839	-0.04917		-0.0138201	-0.224326	-0.162537	-0.426368		-0.362359	-0.351774	-0.933921	-0.577029		-0.108846	-0.0915396	-0.0624225	0.00376066		0.160796	0.139699	0.134754		0.0445439	0.26163	0.206949		0.431799	0.232134	0.360304		0.0222126	0.000140594	-0.0556618	-0.39384	1.2275	1.28985		YOR014W	YOR014W ... RTS1 protein biosynthesis* protein phosphatase type 2A activitcytoplasm* | YOR015W	-0.013547	-0.015133	-0.361551	0	0.368239
YDR441C	YDR441C ... APT2 biological process unknown molecular function unknown* cytoplasm | YDR442W	yes	.		0.0207	0.38971	0.612428		0.716719	0.485616	0.485914	0.322296		0.0955873	0.170178	0.541694	0.122631		0.031785	0.150263	0.203919	0.20949		0.065397	0.236769	0.11308		-0.0721313	0.209316	0.315838		-0.00297991	0.063268	0.197456		-0.00557037	-0.100649	-0.158762	0.179985	0.385819	0.0565759		YDR441C	YDR441C ... APT2 biological process unknown molecular function unknown* cytoplasm | YDR442W	#N/A	#N/A	#N/A	#N/A	#N/A
YPL227C	YPL227C ... ALG5 N-linked glycosylation dolichyl-phosphate beta-glucosyltraendoplasmic reticulum membrane | YPL228W	yes	.		-0.107018	0.305107	0.019607		-0.260913	-0.46363	0.377632	-0.347669		-2.28292	-0.977008	-0.83398	-0.678426		0.0955738	-0.13689	-0.349046	-0.134812		-0.16299	-0.157143	0.221613		-0.0170644	0.051274	0.576171		0.339417	0.293461	0.0579749		-0.250549	-0.25399	0.827205	0.934262	-0.0852809	-0.346779		YPL227C	YPL227C ... ALG5 N-linked glycosylation dolichyl-phosphate beta-glucosyltraendoplasmic reticulum membrane | YPL228W	0.049705	0.033007	-0.202408	0	0.208056
YMR031C	YMR031C ... YMR031C biological process unknown molecular function unknown cytoplasm* | YMR032W	yes	.		-0.999679	-1.0415	-1.03504		-0.80935	-0.42685	-0.474086	-1.03031		-1.31199	-0.406796	-1.11516	-0.25686		-0.398241	-1.25052	-0.304234	-0.114805		-0.0174756	0.129528	0.27599		0.0665223	0.609013	0.619133		0.570848	0.555255	0.351151		-0.127544	-0.202524	-0.23517	-1.03499	0.0871049	-0.155224		YMR031C	YMR031C ... YMR031C biological process unknown molecular function unknown cytoplasm* | YMR032W	-0.651588	-0.885002	-1.02433	0	0.177621
YNL306W	YNL306W ... MRPS18 protein biosynthesis structural constituent of ribosome mitochondrial small ribosomal subun | YNL307C	yes	.		-0.539499	-0.815689	-0.514548		-0.659972	-1.57466	-1.1585	-1.39994		-1.17532	-0.314043	-0.98141	-0.252692		-0.635918	0.317029	0.0822115	0.21358		0.000903607	-0.214171	0.169741		0.550263	0.390821	0.616233		0.333936	0.484242	0.23413		-0.18888	-0.156799	-0.415632	0.11189	0.278857	0.463834		YNL306W	YNL306W ... MRPS18 protein biosynthesis structural constituent of ribosome mitochondrial small ribosomal subun | YNL307C	-0.461818	-0.548437	-0.790889	0	0.357194
YGL094C	YGL094C ... PAN2 postreplication repair* poly(A)-specific ribonuclease activcytoplasm* | YGL095C	yes	.		-0.213482	-0.172924	-0.12948		0.0125345	-0.22202	0.00500774	-0.138539		-0.508915	0.0343481	-0.221612	-0.247043		-0.121514	-0.127957	-0.0745696	0.0866134		0.111513	0.0834073	-0.0984408		0.335441	0.210106	0.164627		0.157023	0.0491027	0.243442		0.0686161	-0.105475	-0.136461	-0.393618	0.0768093	0.0458219		YGL094C	YGL094C ... PAN2 postreplication repair* poly(A)-specific ribonuclease activcytoplasm* | YGL095C	-0.376199	-0.388883	-0.312449	0	-0.129946
YEL009C	YEL009C ... GCN4 regulation of transcription fr DNA binding* nucleus | YEL010W	yes	.		-0.309777	-0.374696	-0.059734		-0.157692	-0.114849	-0.137241	-0.117821		0.328443	0.348729	0.189597	0.140035		0.107472	0.0559392	-0.0356625	0.150465		-0.138535	-0.224801	-0.289436		0.161124	0.219679	0.00289584		0.187893	0.170715	0.197702		-0.076515	-0.171245	-0.0292805	-0.217938	0.102873	0.0488937		YEL009C	YEL009C ... GCN4 regulation of transcription fr DNA binding* nucleus | YEL010W	#N/A	#N/A	#N/A	#N/A	#N/A
YLR025W	YLR025W ... SNF7 late endosome to vacuole trans molecular function unknown cytoplasm* | YLR026C	yes	.		1.05952	1.50876	0.685395		1.20303	1.17541	1.26423	0.169726		-0.918513	0.662032	-0.659482	-0.522161		-0.205596	-0.777029	-0.514117	0.381023		-0.152613	0.059734	0.179246		0.121805	0.491459	0.646659		0.376146	0.660973	0.469416		0.102782	-0.322887	-0.0973611	-1.00173	0.167555	0.330062		YLR025W	YLR025W ... SNF7 late endosome to vacuole trans molecular function unknown cytoplasm* | YLR026C	1.0488	1.11348	0.797536	0	0.03718
YOR248W	YOR248W ... | YOR249C	yes	.						0.62361	-0.694956	-0.328671	-0.813897		-0.282924	-0.623371	0.958839	0.184973		-1.57555	-1.73955	-0.385632	0.555405		0.505559	-0.446157	0.0580215			0.302425	0.104334		0.268556	0.525318	-0.199997		-0.506141	0.085695	-0.196897	0.184458	1.10866	1.1353		YOR248W	YOR248W ... | YOR249C	#N/A	#N/A	#N/A	#N/A	#N/A
YAL011W	YAL011W ... SWC3 chromatin remodeling* molecular function unknown nucleus* | YAL012W	yes	.		-0.199319	-0.350236	-0.340209		-0.894239	-0.738025	-0.0738569	-0.911194		-1.45285	-0.955946	-0.778127	-0.509777		-0.865052	-0.614023	-0.367428	0.150597		0.242525	-0.0226908	-0.0500522		-0.00747833	0.0968413	-0.398267		0.400346	0.0905361	0.332461		-0.160561	-0.114075	-0.308865	-1.23058	0.0444065	-0.025977		YAL011W	YAL011W ... SWC3 chromatin remodeling* molecular function unknown nucleus* | YAL012W	-0.207783	-0.123401	-0.360427	0	-0.210377
YGL254W	YGL254W ... FZF1 positive regulation of transcr transcription factor activity nucleus | YGL255W	yes	.		-0.053068	0.277232	0.271611		-0.153998	-1.55057	-0.21237	-1.31837		-0.545959	-0.701373	-1.14491	-0.550825		0.289525	0.623016	-0.0961258	0.777797		0.308614	0.1778	0.0146497		0.22134	-0.073618	-0.0636321		0.241147	-0.195707	0.157756		0.0913437	0.157926	0.251973	-0.178112	0.013354	0.209798		YGL254W	YGL254W ... FZF1 positive regulation of transcr transcription factor activity nucleus | YGL255W	0.543321	0.344517	-0.190944	0	0.233562
YCR033W	YCR033W ... SNT1 histone deacetylation* NAD-dependent histone deacetylase ahistone deacetylase complex | YCR034W	yes	.		-0.338837	-0.314255	-0.573962		-0.698318	-0.581299	-0.385262	-0.57257		-0.824818	-0.445584	-0.613188	-0.516067		0.0805003	-0.132897	-0.473431	-0.0392915		-0.34039	-0.0666094	-0.140841		0.297962	-0.0549926	0.108951		0.384916	0.0870294	0.148925		-0.266358	-0.323768	-0.579152	-0.39119	-0.410144	-0.231297		YCR033W	YCR033W ... SNT1 histone deacetylation* NAD-dependent histone deacetylase ahistone deacetylase complex | YCR034W	-0.310985	-0.416764	-0.468486	0	-0.015253
YKR041W	YKR041W ... YKR041W biological process unknown molecular function unknown cytoplasm* | YKR042W	yes	.		-1.04001	-1.13231	-1.04468		0.62361	-0.788065	-0.402671	-0.0917664		0.717076	-0.231053		-0.324222		1.59438	0.938518	0.144882	-0.220241		0.353556	0.197699	0.615379		0.255556	1.05731	1.18525		-0.752506	0.373314	0.434596		-0.589196	0.334629	0.202199	0.291374	-0.684888	0.863707		YKR041W	YKR041W ... YKR041W biological process unknown molecular function unknown cytoplasm* | YKR042W	#N/A	#N/A	#N/A	#N/A	#N/A
YJL174W	YJL174W ... KRE9 cell wall organization and bio molecular function unknown extracellular region | YJL175W	yes	.		-0.161953	-0.217021	0.108883		-0.500512	-0.528597	-0.439459	-0.267338		-0.460627	-0.471368	-0.347429	-0.514927		0.0897906	0.383594	0.123117	-0.13204		0.134916	0.257503	0.0646376		0.22134	0.106356	0.128304		0.126865	0.095502	0.107191		-0.172911	0.10907	1.12539	1.48805	0.536434	0.427251		YJL174W	YJL174W ... KRE9 cell wall organization and bio molecular function unknown extracellular region | YJL175W	-0.242988	-0.941747	-0.42287	0	-0.234061
YHL048W	YHL048W ... COS8 response to unfolded protein molecular function unknown nuclear membrane | YHL049C	yes	.		1.11199	1.08777	1.40479		0.586135	1.04755	0.602269	0.806406		0.016636	-0.738848	-0.258119	-0.387575		0.516377	-0.275607	0.126267	0.52159		0.773039	0.214573	0.538212		-1.27051	-0.342094	0.300731		-0.230932	-0.211648	0.194282		1.10509	0.91895	1.79572	1.63089	1.41881	1.24222		YHL048W	YHL048W ... COS8 response to unfolded protein molecular function unknown nuclear membrane | YHL049C	#N/A	#N/A	#N/A	#N/A	#N/A
YMR236W	YMR236W ... TAF9 transcription initiation from general RNA polymerase II transcripSAGA complex* | YMR237W	yes	.		0.446146	0.135248	-0.006354		-0.546315	-0.148467	0.199116	-0.181283		-1.45285	-0.762774	-0.899433	-0.719842		0.108953	-0.55669	-0.250454	-0.220904		-0.100777	0.14271	0.262181		0.811949	0.104745	0.184552		0.411072	0.373314	0.227772		-0.326162	-0.0447318	-1.06084	-0.487159	-0.430787	-0.0668277		YMR236W	YMR236W ... TAF9 transcription initiation from general RNA polymerase II transcripSAGA complex* | YMR237W	0.083524	-0.067425	-0.158373	0	-0.468138
YGR007W	YGR007W ... MUQ1 phosphatidylethanolamine biosy ethanolamine-phosphate cytidylyltracytoplasm* | YGR008C	yes	.		-0.358931	-0.618171	-0.516283		-0.307528	-0.411163	-0.200865	-1.10974		-0.452849	-0.592344	-0.459116	-0.68797		0.171168	-0.640019	-0.435436	0.10464		0.207549	0.033836	0.0218151		0.560102	0.171362	0.0917477		0.1919	0.269885	0.33367		-0.271311	-0.179871	-0.48069	-0.153864	-0.0763709	-0.225386		YGR007W	YGR007W ... MUQ1 phosphatidylethanolamine biosy ethanolamine-phosphate cytidylyltracytoplasm* | YGR008C	0.143827	-0.241314	-0.534144	0	0.818779
YBR208C	YBR208C ... DUR1,2 allantoin catabolism* allophanate hydrolase activity* cytoplasm | YBR209W	yes	.		-0.582083	-0.321063	-0.394478		0.267348	0.23793	0.341854	0.39827		0.314766	0.42816	0.259441	0.134175		0.443216	0.146113	0.150093	0.465561		-0.148735	0.360383	0.070242		-0.384933	0.0892697	-0.0133774		0.0599693	-0.366371	-0.149815		-0.103076	0.0213506	0.0124025	0.402292	-0.208602	-0.177377		YBR208C	YBR208C ... DUR1,2 allantoin catabolism* allophanate hydrolase activity* cytoplasm | YBR209W	0.545329	0.484162	0.343025	0	0.110975
YLR034C	YLR034C ... SMF3 intracellular sequestering of iron ion transporter activity vacuolar membrane (sensu Fungi) | YLR035C	yes	.		0.454802	0.562082	0.952266		0.677248	0.880226	0.738264	1.0685		-0.0889137	-0.305347	-0.0717222	-0.213573		0.154559	0.110622	0.0842937	0.0516649		0.220969	0.326214	0.0362226		0.42616	0.334548	0.169657		0.013834	0.0321318	0.301849		-0.120187	0.0144586	-0.0616784	0.437224	0.0029187	-0.079709		YLR034C	YLR034C ... SMF3 intracellular sequestering of iron ion transporter activity vacuolar membrane (sensu Fungi) | YLR035C	0.594218	1.65972	1.30912	0	-1.88207
YBR078W	YBR078W ... ECM33 cell wall organization and bio molecular function unknown mitochondrion* | YBR079C	yes	.		-0.254289	-0.02474	0.247831		-0.268421	-0.329675	-0.431118	-0.0729798		0.287261	0.13522	0.195224	0.180137		0.159941	0.0895726	0.156078	0.063326		0.122967	0.00701571	-0.0267696		0.518048	0.161512	0.135977		-0.143641	-0.115049	-0.127226		-0.114168	-0.113873	-0.334787	-0.0765377	-0.0543928	-0.117192		YBR078W	YBR078W ... ECM33 cell wall organization and bio molecular function unknown mitochondrion* | YBR079C	-0.109504	-0.178808	-0.346869	0	0.20733
YNL307C	YNL307C ... MCK1 protein amino acid phosphoryla glycogen synthase kinase 3 activitysoluble fraction | YNL308C	yes	.		-0.26686	-0.210474	0.207825		-0.13685	-0.141222	-0.309475	0.0109392		0.55823	0.261731	0.348172	0.386489		0.241009	-0.124393	0.146491	0.125999		0.00876453	-0.205091	-0.197283		0.373184	0.24339	0.0735218		-0.142605	-0.0513518	-0.0909824		-0.151691	-0.323496	-0.347542	-0.806929	0.00332317	-0.210748		YNL307C	YNL307C ... MCK1 protein amino acid phosphoryla glycogen synthase kinase 3 activitysoluble fraction | YNL308C	-0.403486	-0.253709	-0.175377	0	-0.048849
YAL023C	YAL023C ... PMT2 O-linked glycosylation dolichyl-phosphate-mannose-protein endoplasmic reticulum | YAL024C	yes	.		-0.651109	-0.356398	-0.11449		-0.176407	-0.188899	-0.273198	0.0919476		0.299368	0.112856	0.000749504	0.105585		0.372986	0.26434	0.314423	0.154757		0.159651	0.109577	0.130015		-0.0728427	-0.0530935	0.0138887		-0.0974967	-0.190253	-0.125892		0.115968	0.0485158	0.233797	0.290662	-0.215854	-0.24748		YAL023C	YAL023C ... PMT2 O-linked glycosylation dolichyl-phosphate-mannose-protein endoplasmic reticulum | YAL024C	0.048089	0.053413	-0.107698	0	0.288089
YNL231C	YNL231C ... PDR16 response to drug* phosphatidylinositol transporter accytoplasm* | YNL232W	yes	.		0.369601	0.621954	-0.074706		0.24114	0.356574	0.480607	-0.120457		-0.848258	-0.0384082	-0.878122	-0.0493991		-0.193076	-0.206122	-0.72459	0.120912		-0.0354257	-0.117375	-0.0670995		0.32267	0.474639	0.35804		0.449017	0.530777	0.557899		-0.0221558	-0.061991	-0.714385	-1.01432	-0.472343	-0.374724		YNL231C	YNL231C ... PDR16 response to drug* phosphatidylinositol transporter accytoplasm* | YNL232W	0.775523	0.917094	0.740709	0	0.353774
YPL022W	YPL022W ... RAD1 removal of nonhomologous ends* single-stranded DNA specific endodenucleotide excision repair factor 1 | YPL023C	yes	.		0.111137	-0.01729	-0.154505		0.023697	0.0899443	0.294603	-0.174229		-0.85309	6.6e-05	-0.480811	-0.13071		0.282436	-0.505089	-0.222206	0.177636		0.318953	0.042421	-0.0694348		0.00739495	0.183	0.21879		0.143879	0.191159	0.491022		-0.0586817	-0.156787	0.961533	0.771262	0.0249503	0.0503635		YPL022W	YPL022W ... RAD1 removal of nonhomologous ends* single-stranded DNA specific endodenucleotide excision repair factor 1 | YPL023C	#N/A	#N/A	#N/A	#N/A	#N/A
YPL145C	YPL145C ... KES1 vesicle-mediated transport* oxysterol binding cytoplasm* | YPL146C	yes	.		-0.462082	-0.261366	-0.010763		-0.13108	-0.359297	-0.16709	-0.0940436		0.222743	0.0233592	0.222886	0.138847		0.0463888	0.308483	0.0531172	0.0628888		0.0115703	-0.175962	-0.138511		0.470076	-0.0566961	-0.112521		-0.176188	-0.121392	-0.0834797		-0.00696667	-0.197578	1.04062	0.944655	0.0435274	-0.0575111		YPL145C	YPL145C ... KES1 vesicle-mediated transport* oxysterol binding cytoplasm* | YPL146C	0.080227	-0.004226	-0.023911	0	0.194979
YGR186W	YGR186W ... TFG1 transcription initiation from general RNA polymerase II transcriptranscription factor TFIIF complex | YGR187C	yes	.		0.190081	0.017265	-0.1516		-0.0554749	-0.366333	0.222967	-0.131882		-0.682855	-0.557782	-1.67995	-0.382334		0.0572457	-0.385917	-0.157266	-0.0374568		-0.0705735	-0.0856904	0.0914076		0.0821826	0.190149	0.215537		0.368559	0.345316	0.277579		-0.117768	-0.0824134	-0.218058	-0.330115	-0.0259508	0.102494		YGR186W	YGR186W ... TFG1 transcription initiation from general RNA polymerase II transcriptranscription factor TFIIF complex | YGR187C	0.191316	0.195127	0.035143	0	0.123723
YNL153C	YNL153C PAC cluster GIM3 tubulin folding tubulin binding cytoplasm* | YNL154C	yes	.		0.245296	0.607286	-0.133702		-0.817989	-0.846959	0.42635	-0.931467		-1.61205	-1.57184	-1.29838	-0.869474		0.121892	-0.536021	-0.531627	0.177898		0.119806	-0.0900806	-0.00610888		-0.379811	0.211043	0.0415389		0.0982645	0.570172	0.203271		0.277253	0.176684	-0.235745	-1.00173	0.314623	0.235735		YNL153C	YNL153C PAC cluster GIM3 tubulin folding tubulin binding cytoplasm* | YNL154C	1.39374	0.65165	-0.276454	0	0.799899
YOL062C	YOL062C ... APM4 vesicle-mediated transport* molecular function unknown AP-2 adaptor complex | YOL063C	yes	.		-0.062437	-0.161474	-0.116835		-0.0868836	-0.256383	0.258069	-0.274808		-0.734031	0.0235196	0.219426	-0.143649		-0.435064	0.143801	0.13348	0.0756064		-0.068677	-0.0504275	-0.0516715		0.273896	0.0845096	0.0373978		0.16966	-0.00393555	0.130699		-0.503621	-0.377191	-0.58057	-0.798959	0.705902	0.72347		YOL062C	YOL062C ... APM4 vesicle-mediated transport* molecular function unknown AP-2 adaptor complex | YOL063C	-0.030486	0.043058	-0.081612	0	0.244722
YOR383C	YOR383C ... FIT3 siderophore transport molecular function unknown cell wall (sensu Fungi) | YOR384W	yes	.		0.376657	-0.018319	0.555041		1.52407	0.0155376	0.118788	0.556311		0.395148	-0.690485	-0.893604	-0.755579		-0.338506	0.582374	0.0909598	-0.154921		0.408535	0.637611	0.152589		1.34922	0.649228	0.459429		0.345553	0.284309	0.198034		-0.899984	-0.251812	-0.275698	1.06108	0.811679	0.169463		YOR383C	YOR383C ... FIT3 siderophore transport molecular function unknown cell wall (sensu Fungi) | YOR384W	#N/A	#N/A	#N/A	#N/A	#N/A
YKR072C	YKR072C ... SIS2 G1/S transition of mitotic cel phosphopantothenoylcysteine decarbocytoplasm* | YKR073C	yes	.		-0.081199	-0.161815	-0.186425		0.166403	-0.153062	0.128116	-0.295858		-0.452849	-0.768319	-0.602149	-0.830342		0.355593	-0.0835086	-0.63402	-0.465354		-0.188454	-0.0615648	-0.168838		0.450511	0.0224379	-0.0438152		0.374674	0.232148	0.236282		0.136523	-0.0604271	-0.517874	-0.679122	-0.102052	-0.125897		YKR072C	YKR072C ... SIS2 G1/S transition of mitotic cel phosphopantothenoylcysteine decarbocytoplasm* | YKR073C	-0.074799	-0.117965	-0.046664	0	-0.108178
YAR014C	YAR014C ... BUD14 cellular morphogenesis during molecular function unknown bud neck* | YAR015W	yes	.		0.029972	-0.15971	-0.253175		-0.00715639	-0.0126961	0.23294	-0.389048		-0.452849	-0.179271	-1.18125	-0.569575		0.0849682	-0.803685	-0.631549	-0.15607		-0.112807	0.250545	0.307257		-0.747835	0.0888299	0.140166		0.74986	0.391348	0.424383		-0.0735168	0.0821025	-0.381956	-0.55157	0.0925828	0.109769		YAR014C	YAR014C ... BUD14 cellular morphogenesis during molecular function unknown bud neck* | YAR015W	-0.003925	-0.223031	-0.120857	0	0.148301
YBL067C	YBL067C ... UBP13 biological process unknown ubiquitin-specific protease activitcellular component unknown | YBL068W	yes	.		-0.429993	-0.311367	-0.306878		-0.31185	-0.264716	0.204115	-0.484661		-1.05919	-0.179584	-0.213464	-0.376984		-0.0271087	-0.35895	-0.39123	0.286798		0.299858	0.205983	0.131395		0.011887	0.391679	0.273686		0.355492	0.329333	0.299		-0.0474893	-0.0757526	-0.376667	-0.567154	0.168453	0.19602		YBL067C	YBL067C ... UBP13 biological process unknown ubiquitin-specific protease activitcellular component unknown | YBL068W	-0.137293	-0.128387	0.025261	0	0.249563
YBR276C	YBR276C ... PPS1 protein amino acid dephosphory protein tyrosine/threonine phosphatcellular component unknown | YBR277C	yes	.		-0.234404	-0.194982	-0.148256		0.0766151	-0.355571	0.257781	-0.246133		-0.438494	-0.240042	-0.273424	-0.299199		-0.374726	0.0867977	-0.304443	0.286614		0.0880363	-0.0544074	0.116063		-0.195519	0.00469829	0.193506		0.204426	0.19413	0.418985		-0.163611	-0.198603	-0.275925	-0.323389	-0.141511	-0.0174484		YBR276C	YBR276C ... PPS1 protein amino acid dephosphory protein tyrosine/threonine phosphatcellular component unknown | YBR277C	#N/A	#N/A	#N/A	#N/A	#N/A
YCR084C	YCR084C ... TUP1 negative regulation of transcr general transcriptional repressor anucleus | YCR085W	yes	.		-0.702395	-0.315639	-0.099097		-0.136685	-0.37853	-0.421552	-0.0825713		0.589696	0.134565	-0.0174648	0.0658301		0.143527	0.19539	0.255503	0.0146668		-0.0449016	-0.0226622	-0.167372		0.392363	0.0700412	0.0271475		0.0601501	-0.204334	-0.0852928		-0.184398	-0.212625	-0.496838	-0.412533	-0.00247234	-0.133675		YCR084C	YCR084C ... TUP1 negative regulation of transcr general transcriptional repressor anucleus | YCR085W	-0.194845	-0.158763	-0.307896	0	0.231084
YDL035C	YDL035C ... GPR1 pseudohyphal growth* G-protein coupled receptor activityplasma membrane | YDL036C	yes	.		-0.52641	-0.0705	-0.281334		-0.306001	-0.544396	-0.129387	-0.0625832		-0.489375	-0.874909	-0.617662	-0.396768		0.280065	-0.394419	-0.258093	-0.17864		0.0683502	-0.0350883	0.0155862		0.428621	-0.112612	-0.0495787		0.294412	0.143284	0.456868		0.172644	0.117674	0.211967	-0.493614	0.44676	0.324824		YDL035C	YDL035C ... GPR1 pseudohyphal growth* G-protein coupled receptor activityplasma membrane | YDL036C	0.187012	0.021332	0	0	0.16324
YDR494W	YDR494W ... RSM28 protein biosynthesis* structural constituent of ribosome mitochondrial small ribosomal subun | YDR495C	yes	.		-0.41822	-0.1295	-0.81175		-1.34962	-0.864881	-0.304107	-1.79468		-1.9513	-0.705833	-0.79966	-0.467264		0.243882	-0.652091	-0.634222	0.782865		0.129208	-0.239195	-0.277411		0.102399	0.453814	0.246736		-0.0138899	0.518654	0.200487		-0.389434	-0.247462	-0.577169	-2.64239	0.226842	0.00033051		YDR494W	YDR494W ... RSM28 protein biosynthesis* structural constituent of ribosome mitochondrial small ribosomal subun | YDR495C	-0.831231	-0.849641	-1.00225	0	0.249106
YGR036C	YGR036C ... CAX4 N-linked glycosylation* pyrophosphatase activity integral to endoplasmic reticulum m | YGR037C	yes	.		-0.233615	-0.129715	-0.116122		-0.417032	-0.332386	-0.367026	-0.0295141		0.219576	0.028706	-0.579443	-0.201597		0.434723	0.219804	0.085204	-0.0544321		0.221914	0.438191	0.00706651		-0.432784	0.461123	0.153133		-0.137933	-0.28147	0.328802		0.449465	0.0701159	0.230965	0.967967	0.148189	0.230345		YGR036C	YGR036C ... CAX4 N-linked glycosylation* pyrophosphatase activity integral to endoplasmic reticulum m | YGR037C	#N/A	#N/A	#N/A	#N/A	#N/A
YGR072W	YGR072W ... UPF3 mRNA catabolism* molecular function unknown cytoplasm* | YGR073C	yes	.		0.812143	0.407563	-0.015487		-0.784475	0.305044	0.167644	-0.185369		-1.06952	-0.453446	-0.0220521	-0.320527		0.478902	-1.73955	-0.284571	0.167275		0.341209	0.677545	0.278194		-0.335804	0.75475	0.0754791		0.37976	0.369582	0.146585		0.54078	0.0350689	0.301188	-1.78955	0.309027	0.175105		YGR072W	YGR072W ... UPF3 mRNA catabolism* molecular function unknown cytoplasm* | YGR073C	0.194851	-0.008278	0.178976	0	-0.060838
YGR267C	YGR267C ... FOL2 folic acid and derivative bios GTP cyclohydrolase I activity cytoplasm* | YGR268C	yes	.		0.039365	0.192462	0.004721		0.107034	-0.190164	0.368402	-0.782152		-0.939678	-0.247862	0.695805	-0.381593		-0.387918	-0.376984	-0.0238116	0.189604		-0.393727	-0.280733	-0.238533		0.169501	-0.079292	0.0998548		0.497131	0.134127	0.252879		-0.212487	-0.106764	-0.569878	-0.609451	-0.182433	-0.146051		YGR267C	YGR267C ... FOL2 folic acid and derivative bios GTP cyclohydrolase I activity cytoplasm* | YGR268C	-0.169402	0.058505	-0.001667	0	-0.025523
YIR042C	YIR042C ... YIR042C biological process unknown molecular function unknown cellular component unknown | YJL001W	yes	.		-0.040011		0.8484		0.0386473	-1.10999	2.23241	0.840878		0.132113	-1.03841		-0.0696488		1.00942	1.26045	-0.324395	0.241238		-1.75259	-1.33924	-1.0544		-0.550271	-0.349878	-0.3313		0.398953	0.0191321	-0.209544		0.064175	-0.324012	0.498249	0.431098	0.845627	0.751893		YIR042C	YIR042C ... YIR042C biological process unknown molecular function unknown cellular component unknown | YJL001W	#N/A	#N/A	#N/A	#N/A	#N/A
YKR100C	YKR100C ... SKG1 cell wall organization and bio molecular function unknown bud tip* | YKR101W	yes	.		0.058123	0.04327	-0.122841		-0.333321	-0.0522778	-0.0440216	-0.332132		-0.782998	-0.405191	-1.85932	-0.68797		0.336992	-0.282697	-0.410441	-0.0943406		0.227976	-0.206987	-0.148128		0.067728	0.157109	0.278011		0.236847	0.364414	0.272939		0.220841	-0.116934	0.0536467	-0.0438106	0.463379	0.245734		YKR100C	YKR100C ... SKG1 cell wall organization and bio molecular function unknown bud tip* | YKR101W	0.0387	0.068637	-0.119882	0	0.111804
YLR204W	YLR204W ... QRI5 biological process unknown molecular function unknown mitochondrion | YLR205C	yes	.		0.468716	0.514491	0.610394		-1.14898	-0.235524	-0.0233839	-0.0791388		-0.766007	-0.816016		-0.159591		0.746383	-0.877058	-0.0961258	-0.405273		-0.274266	-0.402945	-0.357581		-1.05478	0.217093	0.245083		0.318816	0.599082	0.465584		-0.566829	-0.331359	-1.14316	-1.74965	0.384785	-0.232461		YLR204W	YLR204W ... QRI5 biological process unknown molecular function unknown mitochondrion | YLR205C	#N/A	#N/A	#N/A	#N/A	#N/A
YLR206W	YLR206W ... ENT2 endocytosis* clathrin binding actin cortical patch | YLR207W	yes	.		0.49934	0.700056	0.83591		0.728307	0.588351	0.791031	0.472795		-1.14966	-0.306897	-0.332392	-0.537702		-0.23356	-0.235082	-0.0122942	0.0380399		-0.0547158	-0.0838967	-0.200487		-0.542023	-0.0614732	0.0294292		0.363861	0.27739	0.306822		-0.256781	-0.0658921	-0.453723	-0.267238	-0.046875	0.0631235		YLR206W	YLR206W ... ENT2 endocytosis* clathrin binding actin cortical patch | YLR207W	0.714597	0.769018	0.705389	0	-0.031664
YLR210W	YLR210W ... CLB4 G2/M transition of mitotic cel cyclin-dependent protein kinase regcytoplasm* | YLR211C	yes	.		0.708856	0.723452	1.03528		0.242181	1.15304	0.934229	0.216813		-1.10493	-0.0384082	0.124026	-0.614279		0.119042	-0.587551	-0.229804	0.128654		0.0327323	-0.0155226	-0.0635944		0.54457	0.56546	-0.0670006		0.354831	0.0820831	0.398972		0.00118975	-0.0727344	-0.265759	0.026029	0.248386	0.415986		YLR210W	YLR210W ... CLB4 G2/M transition of mitotic cel cyclin-dependent protein kinase regcytoplasm* | YLR211C	#N/A	#N/A	#N/A	#N/A	#N/A
YML065W	YML065W ... ORC1 DNA replication initiation* ATPase activity* pre-replicative complex* | YML066C	yes	.		-0.357202	-0.356812	-0.493868		0.196189	-0.348153	0.0230926	-0.833192		-0.568327	-0.102539	-0.596288	-0.43583		-0.120643	-0.632639	-0.257877	0.256345		-0.164865	0.161526	0.0965443		0.121335	0.349731	0.23544		0.395981	0.192074	0.18384		0.1708	-0.0217002	-0.103593	0.170474	-0.148168	-0.0727674		YML065W	YML065W ... ORC1 DNA replication initiation* ATPase activity* pre-replicative complex* | YML066C	-0.144236	-0.553115	0.07	0	-0.340235
YMR172W	YMR172W ... HOT1 regulation of transcription fr specific RNA polymerase II transcrinuclear chromosome | YMR173W	yes	.		0.018883	-0.490072	-0.630768		-1.16299	-0.650562	-0.37025	-0.396621		-0.806486	-1.23105	-0.752591	-0.951004		0.687489	-0.0290608	-0.0961258	-0.48		0.242525	0.0456962	-0.513712		-0.422516	-0.213139	-0.0458589		0.347878	-0.0485898	0.381485		-0.407831	-0.0745556	-0.224118	-1.36574	-0.223415	0.00014432		YMR172W	YMR172W ... HOT1 regulation of transcription fr specific RNA polymerase II transcrinuclear chromosome | YMR173W	-0.470567	-0.607269	-0.366415	0	-0.457321
YNR029C	YNR029C ... YNR029C biological process unknown molecular function unknown cytoplasm | YNR030W	yes	.		0.669002	0.583403	0.24592		0.301682	1.07443	0.746883	-0.114286		-0.967423	1.25705	-1.01133	-0.525079		-0.575545	-0.295948	-0.325151	0.214581		0.00893408	-0.0795598	0.15548		-0.241069	0.189215	0.401833		0.455487	0.373314	0.222664		0.19963	0.0257311	0.0631036	-0.962383	0.704583	0.260715		YNR029C	YNR029C ... YNR029C biological process unknown molecular function unknown cytoplasm | YNR030W	0.481916	0.40588	0.234961	0	-0.163337
YOR084W	YOR084W Ö LPX1 peroxisome organization and bi lipase activity | Oleic acid-inducible, peroxisomal matrix localized lipase; transcriptionally activated by Yrm1p along with genes involved in multidrug resistance; peroxisomal import is dependent on the PTS1 receptor, Pex5p and on self-interactionYOR085W	yes	.		-0.81053	-0.823981	-0.1516		-0.329084	-0.5536	-1.06484	0.226309		0.0196384	0.122056	-0.887751	0.504049		-0.189892	-0.0614823	0.337771	0.101687		0.0472684	0.423259	-0.421146		1.18059	0.629892	-0.284231		-0.085081	0.226925	0.117114		-0.0390529	-0.124588	-0.356448	-0.400504	1.13154	1.32239		YOR084W	YOR084W Ö LPX1 peroxisome organization and bi lipase activity | Oleic acid-inducible, peroxisomal matrix localized lipase; transcriptionally activated by Yrm1p along with genes involved in multidrug resistance; peroxisomal import is dependent on the PTS1 receptor, Pex5p and on self-interactionYOR085W	#N/A	#N/A	#N/A	#N/A	#N/A
YOR158W	YOR158W ... PET123 protein biosynthesis structural constituent of ribosome mitochondrial small ribosomal subun | YOR159C	yes	.		-0.702976	-0.81648	-0.798117		-1.52429	-0.286871	-0.871554	-1.57171		-1.64233	0.58308	-0.788933	-0.491573		0.0735475	-1.09319	-0.36323	0.208187		-0.312238	-0.539266	-0.366781		-1.12296	0.297672	0.356803		0.40151	0.436589	0.170613		-0.376953	-0.356043	-0.742133	-1.42483	1.05646	0.76641		YOR158W	YOR158W ... PET123 protein biosynthesis structural constituent of ribosome mitochondrial small ribosomal subun | YOR159C	-1.14266	-1.17146	-1.08105	0	-0.086304
YPL013C	YPL013C ... MRPS16 protein biosynthesis structural constituent of ribosome mitochondrial small ribosomal subun | YPL014W	yes	.		-0.353428	-0.140809	-0.746458		-1.28328	-1.05753	-1.02846	-1.62879		-2.18981	-0.886405	-0.866482	-0.598215		0.0094172	-1.54691	-0.0372321	0.101687		0.296972	0.320073	0.439691		0.198973	0.875514	0.14319		0.356429	0.320203	0.0728956		-0.144073	-0.325678	0.619567	0.341559	0.00259595	0.2034		YPL013C	YPL013C ... MRPS16 protein biosynthesis structural constituent of ribosome mitochondrial small ribosomal subun | YPL014W	-0.357111	-1.38268	-1.29008	0	0.107726
YPL174C	YPL174C ... NIP100 establishment of mitotic spind protein binding* spindle pole body* | YPL175W	yes	.		0.207916	-0.075238	0.000403		0.0386473	-0.383012	0.221665	-0.637629		-1.13092	-0.504072	-0.316795	-0.461619		0.378651	-0.154592	-0.574173	0.314681		-0.085708	0.335203	0.36757		-0.204924	0.47235	0.110593		0.363781	0.15819	0.225412		0.124918	-0.110129	0.77898	0.607149	-0.272429	-0.102916		YPL174C	YPL174C ... NIP100 establishment of mitotic spind protein binding* spindle pole body* | YPL175W	#N/A	#N/A	#N/A	#N/A	#N/A
YPL184C	YPL184C Ö MRN1 biological process unknown molecular function unknown | RNA-binding protein proposed to be involved in translational regulation; binds specific categories of mRNAs, including those that contain upstream open reading frames (uORFs) and internal ribosome entry sites (IRES)YPL185W	yes	.		-0.653828	-0.343678	-0.0041		0.164178	-0.163932	-0.174906	0.12215		0.409647	0.0326113	-0.00593242	0.0615901		0.0489456	0.153531	0.155629	0.0362019		-0.0763629	-0.270547	-0.374923		0.332597	-0.238809	-0.0969644		-0.139237	0.0808028	0.169153		-0.109495	-0.172736	0.820177	0.890601	0.104714	-0.120351		YPL184C	YPL184C Ö MRN1 biological process unknown molecular function unknown | RNA-binding protein proposed to be involved in translational regulation; binds specific categories of mRNAs, including those that contain upstream open reading frames (uORFs) and internal ribosome entry sites (IRES)YPL185W	-0.427262	-0.346412	-0.253738	0	-0.267315
YPR023C	YPR023C ... EAF3 regulation of transcription fr histone acetyltransferase activity histone acetyltransferase complex* | YPR024W	yes	.		-0.152122	-0.604356	-0.284399		-0.268534	-0.385628	-0.198484	-0.447576		-0.59828	-0.687501	-0.651214	-0.253101		-0.0152449	-0.113013	-0.115889	-0.108812		0.0743	0.143335	-0.310051		0.110091	0.109002	0.158463		0.328681	0.0559018	0.476079		-0.0493135	-0.092043	0.756888	0.938702	0.194557	0.133966		YPR023C	YPR023C ... EAF3 regulation of transcription fr histone acetyltransferase activity histone acetyltransferase complex* | YPR024W	0.028567	-0.150061	-0.085106	0	-0.067841
Q0250	Q0250 ... COX2 aerobic respiration* cytochrome-c oxidase activity respiratory chain complex IV (sensu | Q0255		yes	yes	-0.980942	-0.941544	-0.575915		-1.12959	-0.989526	-1.26129	-1.48591		0.108266	0.0334245	0.234687	0.174848		0.505651	0.515487	0.559803	0.696821		-0.191581	-0.306801	-0.449154		0.30156	0.857091	0.41556		0.496162	0.717214	0.725616		-0.222907	-0.298079	0.0143428	-0.360942	0.515557	0.365101		Q0250	Q0250 ... COX2 aerobic respiration* cytochrome-c oxidase activity respiratory chain complex IV (sensu | Q0255	-0.879916	-0.851663	-1.2274	0	0.188496
YAL053W	YAL053W Ö FLC2 biological process unknown molecular function unknown | Putative FAD transporter; required for uptake of FAD into endoplasmic reticulum; involved in cell wall maintenanceYAL054C		yes	yes	0.606543	0.870532	1.21355		0.170378	0.235142	0.184741	0.465204		0.764742	0.596488	0.68253	0.755289		1.06286	0.89927	0.857241	0.867498		0.155902	0.0541084	0.103668		0.75944	0.460874	0.707976		0.466161	0.338628	0.447701		-0.028155	0.0509728	0.938191	1.10703	1.3974	1.3495		YAL053W	YAL053W Ö FLC2 biological process unknown molecular function unknown | Putative FAD transporter; required for uptake of FAD into endoplasmic reticulum; involved in cell wall maintenanceYAL054C	0.179728	0.228478	0.0832	0	0.760111
YAR002C-A	YAR002C-A ... ERP1 ER to Golgi transport molecular function unknown mitochondrion* | YAR002W		.	yes	-0.287403	-0.19713	0.146836		-0.236987	-0.169865	-0.0761764	0.00960402		0.275824	0.156068	0.242265	0.266757		0.405346	0.178703	0.285303	0.317551		0.224394	-0.0615248	0.0814488		0.0356282	0.236482	0.267137		-0.00646128	0.142175	0.241478		-0.0897086	-0.053672	0.441037	0.422899	-0.161062	-0.178208		YAR002C-A	YAR002C-A ... ERP1 ER to Golgi transport molecular function unknown mitochondrion* | YAR002W	-0.216314	-0.087166	-0.092097	0	0.004064
YBL030C	YBL030C ... PET9 aerobic respiration* ATP:ADP antiporter activity mitochondrial inner membrane | YBL031W		.	yes	-1.32962	-1.16248	-0.714643		-1.2048	-1.09613	-1.32475	-1.02099		0.542588	0.523152	0.706019	0.536074		0.395619	0.436616	0.371614	0.239083		-0.182865	-0.343155	-0.317284		0.749543	0.235598	0.27942		-0.235238	-0.180106	-0.278822		-0.23181	-0.162212	-0.58691	-0.316976	0.329044	0.186355		YBL030C	YBL030C ... PET9 aerobic respiration* ATP:ADP antiporter activity mitochondrial inner membrane | YBL031W	-1.03841	-1.28983	-1.16983	0	0.04059
YBL045C	YBL045C ... COR1 aerobic respiration ubiquinol-cytochrome-c reductase acrespiratory chain complex III (sens | YBL046W		.	yes	-1.0132	-1.43018	-0.895945		-1.33146	-1.34887	-1.39667	-1.2869		-0.0930902	0.0457444	-0.00560156	-0.0910052		0.423093	0.175054	0.24011	0.0179653		-0.286321	-0.126928	-0.0912677		0.471991	0.449702	0.385227		0.144205	-0.140487	-0.156527		-0.276429	-0.314324	-0.536419	-0.379406	0.251703	0.191168		YBL045C	YBL045C ... COR1 aerobic respiration ubiquinol-cytochrome-c reductase acrespiratory chain complex III (sens | YBL046W	-1.16855	-1.04669	-1.04709	0	-0.076931
YBL064C	YBL064C iESR cluster PRX1 regulation of cell redox homeo thioredoxin peroxidase activity mitochondrion | YBL065W		yes	yes	-0.018638	-0.002481	-0.45298		-0.491867	-1.41665	-0.382027	-0.924018		-0.509433	-0.892557	0.112249	-0.130938		0.98245	1.50437	0.780492	0.987819		1.18198	0.740419	1.09823		0.879513	1.32909	1.71577		1.26542	1.26276	1.43749		0.23966	0.578955	1.16079	0.94552	1.03705	0.832235		YBL064C	YBL064C iESR cluster PRX1 regulation of cell redox homeo thioredoxin peroxidase activity mitochondrion | YBL065W	0.023075	-0.443182	-0.436329	0	0.706945
YBL078C	YBL078C iESR cluster ATG8 protein-vacuolar targeting* microtubule binding autophagic vacuole* | YBL079W		yes	yes	0.45956	0.640487	0.388969		-0.961353	-1.69496	0.334294	-1.08112		-2.45285	-1.62337	1.29988	-1.31357		1.23181	2.26045	0.968005	1.8961		-0.435547	1.02777	-0.00610888		-0.100588	1.88739	1.35731		1.87839	0.858741	2.5126		-0.412319	-0.090462	1.02293	-0.593149	2.03631	1.90518		YBL078C	YBL078C iESR cluster ATG8 protein-vacuolar targeting* microtubule binding autophagic vacuole* | YBL079W	-0.480647	-1.29743	-1.40873	0	-0.184193
YBL099W	YBL099W ... ATP1 ATP synthesis coupled proton t hydrogen-transporting ATP synthase mitochondrial nucleoid* | YBL100C		.	yes	-1.31188	-1.32439	-0.889105		-1.23774	-1.22405	-1.59053	-1.1243		0.368807	0.280211	0.260979	0.398522		0.268615	0.43674	0.49943	0.302006		-0.344907	-0.319875	-0.457639		0.565594	0.225775	0.1196		-0.211016	-0.186025	-0.337123		-0.408986	-0.235487	-0.60649	-0.402533	0.225161	0.11549		YBL099W	YBL099W ... ATP1 ATP synthesis coupled proton t hydrogen-transporting ATP synthase mitochondrial nucleoid* | YBL100C	-0.924822	-1.05884	-1.01633	0	0.324634
YBR003W	YBR003W ... COQ1 ubiquinone metabolism trans-hexaprenyltranstransferase acmitochondrion | YBR004C		.	yes	-0.284464	-0.686819	-0.564022		-1.04708	-0.656275	-0.532182	-0.892211		-0.545959	-0.517576	-0.147583	-0.427858		0.417075	0.141147	-0.0490772	0.318005		-0.111354	-0.219881	-0.409465		-0.149347	0.136747	0.0378979		0.183513	0.361633	0.34861		-0.248377	-0.339215	-0.584442	-0.205592	-0.0392142	-0.048296		YBR003W	YBR003W ... COQ1 ubiquinone metabolism trans-hexaprenyltranstransferase acmitochondrion | YBR004C	-0.636124	-0.798393	-0.657704	0	0.506623
YBR023C	YBR023C ... CHS3 cytokinesis* chitin synthase activity cytoplasm* | YBR024W		yes	yes	0.14939	0.378172	0.606797		0.0742712	0.161792	0.123343	0.362895		0.601177	0.459327	0.47635	0.56417		0.864394	0.622323	0.653341	0.697013		0.378853	0.0622116	0.0518156		0.811519	0.49262	0.622931		0.623713	0.672215	0.941288		0.0405562	-0.0685235	0.13938	0.170925	0.752934	0.737235		YBR023C	YBR023C ... CHS3 cytokinesis* chitin synthase activity cytoplasm* | YBR024W	0.362018	0.424434	0.126241	0	0.961254
YBR039W	YBR039W ... ATP3 ATP synthesis coupled proton t hydrogen-transporting ATP synthase "proton-transporting ATP synthase, c" | YBR040W		.	yes	-0.580824	-0.7936	-0.88327		-1.60619	-1.24525	-1.04971	-1.82812		-1.08248	-0.0840308	-0.296565	-0.271941		0.192863	-0.252367	0.21063	0.521275		-0.0209398	0.163247	-0.0466836		0.596706	0.667783	0.622942		0.514433	0.456962	0.437104		-0.164035	-0.107029	-0.340218	-0.350907	0.399517	0.243365		YBR039W	YBR039W ... ATP3 ATP synthesis coupled proton t hydrogen-transporting ATP synthase "proton-transporting ATP synthase, c" | YBR040W	-0.864325	-1.15248	-1.31626	0	0.441984
YBR044C	YBR044C ... TCM62 protein complex assembly unfolded protein binding mitochondrial inner membrane | YBR045C		.	yes	-0.240633	-0.542378	-0.699568		-1.01794	-0.153062	-0.534637	-0.81279		-1.48086	-0.21898	-0.967604	-0.852601		-0.0494765	-0.696486	-0.329616	-0.236183		-0.140479	0.0902148	0.167921		-0.693045	0.532723	0.441594		0.370802	-0.0390686	0.156915		-0.0586817	-0.310223	-0.695263	-0.267749	0.160668	-0.178624		YBR044C	YBR044C ... TCM62 protein complex assembly unfolded protein binding mitochondrial inner membrane | YBR045C	-0.934005	-0.437293	-1.36617	0	-0.261913
YBR056W	YBR056W iESR cluster YBR056W biological process unknown molecular function unknown cytoplasm | YBR056W-A		yes	yes	0.585593	0.695805	0.560155		-0.250859	0.0343966	0.31609	-0.171061		-0.452849	0.237226	0.61182	-0.347663		1.16142	0.623016	1.14091	1.22662		0.21367	0.788308	0.308402		1.2412	1.39238	1.43487		1.15593	1.00752	1.18308		-0.217154	-0.190433	0.0970983	0.395624	0.493737	0.57972		YBR056W	YBR056W iESR cluster YBR056W biological process unknown molecular function unknown cytoplasm | YBR056W-A	0.068181	0.136284	0.03449	0	0.701193
YBR071W	YBR071W ... YBR071W biological process unknown molecular function unknown cytoplasm | YBR072C-A		yes	yes	0.573739	0.645927	0.233362		0.0386473	-0.0485928	-0.0276208	-0.0328727		-0.640476	0.16595	0.117285	-0.324222		0.937267	0.82523	0.692928	1.14713		0.446665	0.128752	0.163816		1.39306	0.946282	1.14255		0.832457	0.69457	0.995458		-0.292241	-0.357472	0.773837	0.337177	0.920654	0.68298		YBR071W	YBR071W ... YBR071W biological process unknown molecular function unknown cytoplasm | YBR072C-A	-0.4763	-0.459725	0.075422	0	0.220602
YBR096W	YBR096W ... YBR096W biological process unknown molecular function unknown endoplasmic reticulum | YBR097W		.	yes	-0.123669	-0.099505	0.064255		0.276339	0.0813722	-0.440639	-0.118707		0.225895	0.248305	0.0344149	0.000740512		-0.0559588	0.0380534	0.392329	0.217471		-0.0504938	0.13161	0.0496929		1.01756	0.53829	0.340018		0.369067	0.130338	0.329028		-0.0893785	-0.229597	0.206227	0.10917	0.270124	0.066168		YBR096W	YBR096W ... YBR096W biological process unknown molecular function unknown endoplasmic reticulum | YBR097W	0.338668	0.111668	0.170999	0	0.646007
YBR126C	YBR126C iESR cluster TPS1 response to stress* "alpha,alpha-trehalose-phosphate syn"cytoplasm* | YBR127C		yes	yes	-0.644556	-0.864237	-0.50471		-0.953658	-1.16183	-0.820283	-0.942343		0.0528243	-0.0299466	-0.0733413	-0.174798		0.922434	1.04245	0.877879	1.06912		-0.115523	0.213353	-0.121075		1.12858	0.809932	0.767622		1.45167	0.929154	1.279		-0.442084	0.0803929	-0.182301	0.654455	0.468797	0.624268		YBR126C	YBR126C iESR cluster TPS1 response to stress* "alpha,alpha-trehalose-phosphate syn"cytoplasm* | YBR127C	-1.05993	-0.976874	-0.638827	0	-0.259496
YBR137W	YBR137W ... YBR137W biological process unknown molecular function unknown cytoplasm | YBR138C		yes	yes	0.047451	0.270537	-0.480436		-0.153998	-0.640508	-0.172024	-1.08112		-1.28292	-0.41692	1.21346	-0.585654		-0.212975	0.79096	0.884245	1.25651		0.425971	0.390344	-0.389438		0.338697	1.08003	0.0261088		0.324563	0.885963	0.817925		-0.323824	-0.587564	0.382036	0.0923401	-0.369762	-0.228411		YBR137W	YBR137W ... YBR137W biological process unknown molecular function unknown cytoplasm | YBR138C	0.106461	0.080709	-0.100935	0	0.360975
YBR139W	YBR139W iESR cluster YBR139W biological process unknown carboxypeptidase C activity vacuole (sensu Fungi) | YBR140C		yes	yes	-1.29635	-1.09956	-0.685488		-1.04751	-1.30854	-1.26207	-0.94237		0.515442	0.371468	0.677514	0.478524		0.917787	1.11107	1.16847	1.01974		0.34061	0.0993145	0.259625		0.655105	1.11093	1.18957		1.00358	0.960576	0.848885		-0.236903	0.0223097	0.193348	0.526927	0.775568	0.748238		YBR139W	YBR139W iESR cluster YBR139W biological process unknown carboxypeptidase C activity vacuole (sensu Fungi) | YBR140C	-1.16741	-1.05388	-0.793632	0	0.338782
YBR149W	YBR149W iESR cluster ARA1 carbohydrate metabolism aldo-keto reductase activity* cytosol | YBR150C		yes	yes	0.095363	0.101634	-0.014097		-0.256575	0.0275102	0.0786125	-0.540432		-0.754386	0.0782367	-0.235914	-0.231586		0.187022	0.246574	0.160035	0.561119		0.0122873	0.225653	-0.0523645		0.138252	0.732332	0.778132		1.08117	0.923336	1.01244		-0.134488	-0.334465	-0.000465303	-0.261528	1.20864	1.00277		YBR149W	YBR149W iESR cluster ARA1 carbohydrate metabolism aldo-keto reductase activity* cytosol | YBR150C	0.219262	0.154596	0.1952	0	0.556225
YBR160W	YBR160W ... CDC28 protein amino acid phosphoryla cyclin-dependent protein kinase actcytoplasm* | YBR161W		.	yes	0.76342	0.455666	0.250903		0.609804	0.0381053	0.347715	-0.259998		-0.675242	-0.340971	-0.686703	-0.594634		0.116332	-0.573544	0.135605	0.430995		0.0661447	-0.0976346	-0.0138862		-0.377428	0.216011	0.382159		0.352424	0.642921	0.665012		-0.0978523	0.0217721	0.421713	-0.191409	0.553972	0.327864		YBR160W	YBR160W ... CDC28 protein amino acid phosphoryla cyclin-dependent protein kinase actcytoplasm* | YBR161W	0.14923	0.130087	0.426894	0	-0.04982
YBR214W	YBR214W ... SDS24 endocytosis* molecular function unknown cytoplasm | YBR215W		yes	yes	-0.42334	-0.22893	0.111434		-0.639425	-1.2031	-1.5235	-0.773691		1.10174	0.171045	0.365464	0.453286		2.59438	2.72859	3.02317	2.59354		0.737289	0.72992	0.819862		2.43998	1.80166	2.32673		2.70219	1.50989	2.29366		-0.536729	-0.442751	0.648455	0.688827	1.27996	1.23265		YBR214W	YBR214W ... SDS24 endocytosis* molecular function unknown cytoplasm | YBR215W	-0.286158	-0.663981	-0.380604	0	0.490402
YBR216C	YBR216C ... YBP1 response to oxidative stress molecular function unknown cytoplasm | YBR217W		.	yes	-0.156772	-0.025751	-0.258903		-0.300155	0.0885524	0.0447876	-0.496157		-0.739563	0.200779	0.125271	-0.125271		0.169882	-0.0359472	-0.0961258	0.343762		0.0377049	-0.0817042	-0.195012		0.271381	0.176895	0.0739604		0.187094	0.142249	0.345818		-0.35209	-0.128253	-0.447107	-0.553979	-0.189872	0.0234986		YBR216C	YBR216C ... YBP1 response to oxidative stress molecular function unknown cytoplasm | YBR217W	0.157472	0.311766	0.333574	0	-0.077438
YBR222C	YBR222C ... PCS60 biological process unknown AMP binding cytoplasm* | YBR223C		.	yes	-0.20351	-0.185971	0.190162		-0.385323	-0.252438	-0.486	-0.191838		0.241412	-0.215286	0.103019	-0.0729029		0.684125	0.565948	0.748717	0.624589		0.0613331	-0.244819	-0.162134		0.0796202	-0.0889885	0.0399298		0.212064	0.161161	0.141136		0.0209151	-0.0817177	0.340976	0.663138	0.594665	0.41737		YBR222C	YBR222C ... PCS60 biological process unknown AMP binding cytoplasm* | YBR223C	-0.008908	-0.180981	-0.431608	0	0.3216
YCL017C	YCL017C ... NFS1 iron ion homeostasis* cystathionine gamma-lyase activity mitochondrion | YCL018W		.	yes	-0.597802	-0.514725	-0.091943		-0.356146	-0.193135	-0.435445	-0.265559		0.288786	0.373741	0.212738	0.133066		0.220276	0.087461	0.215969	0.14334		0.0400159	-0.0880627	-0.00467407		0.5216	0.324169	0.42473		0.20125	0.136822	0.202148		-0.202492	-0.178335	-0.161706	0.205938	0.130262	0.152952		YCL017C	YCL017C ... NFS1 iron ion homeostasis* cystathionine gamma-lyase activity mitochondrion | YCL018W	-0.622197	-0.72641	-0.547582	0	0.040464
YCL040W	YCL040W iESR cluster GLK1 carbohydrate metabolism* glucokinase activity cytosol | YCL041C		yes	yes	-1.31131	-0.950628	-0.392608		-2.33481	-2.07605	-1.77985	-1.52757		0.521616	0.529276	1.10302	0.871804		2.89576	2.94792	2.68365	2.89242		0.468084	0.0822221	-0.0666504		1.96451	0.932903	1.36641		2.28538	1.83566	1.94917		-0.471505	-0.0264064	0.311013	0.893996	1.46778	1.35147		YCL040W	YCL040W iESR cluster GLK1 carbohydrate metabolism* glucokinase activity cytosol | YCL041C	-0.186185	-0.140567	-0.231402	0	0.348381
YCL043C	YCL043C ... PDI1 protein folding protein disulfide isomerase activitendoplasmic reticulum lumen | YCL044C		.	yes	-0.286041	-0.077666	0.392402		-0.0391639	-0.145683	-0.0939887	0.209226		0.54068	0.330927	0.34126	0.374373		0.823505	0.863807	0.671056	0.607024		0.404048	0.337432	0.494199		0.315466	0.133844	0.327786		0.184148	0.173796	0.28607		0.201855	0.250984	0.94555	1.08828	0.255663	0.206215		YCL043C	YCL043C ... PDI1 protein folding protein disulfide isomerase activitendoplasmic reticulum lumen | YCL044C	0.108908	0.062486	-0.09767	0	0.399974
YCL057C-A	YCL057C-A ... YCL057C-A biological process unknown molecular function unknown cellular component unknown | YCL057W		.	yes	-0.896276	-0.643717	-0.316885		-1.59878	-1.28402	-1.20314	-1.02148		-0.199508	-0.175912	-0.652596	-0.143649		0.363054	0.260446	0.542475	-0.0213944		-0.332384	-0.0722342	-0.165889		-0.453104	0.174486	0.214431		0.0981408	-0.00945922	-0.507377		0.260496	0.16882	-0.303812	-0.874435	0.35055	0.0483958		YCL057C-A	YCL057C-A ... YCL057C-A biological process unknown molecular function unknown cellular component unknown | YCL057W	-1.03811	-1.66608	-1.27788	0	-0.66431
YCR036W	YCR036W ... RBK1 D-ribose metabolism ATP binding* cytoplasm* | YCR037C		yes	yes	0.498499	-0.062446	0.024677		-0.387617	0.559858	0.0311127	-0.911194		-0.83472	0.546554	-0.0881944	-0.0441137		0.50127	0.301088	0.298153	1.09653		-0.227554	0.0606109	0.0136544		0.259408	0.85591	0.804519		0.898799	0.506939	0.732702		-0.314411	-0.60726	0.119791	-0.305867	0.715428	0.611295		YCR036W	YCR036W ... RBK1 D-ribose metabolism ATP binding* cytoplasm* | YCR037C	-0.109634	0.057951	-0.302533	0	0.34329
YDL022W	YDL022W iESR cluster GPD1 intracellular accumulation of glycerol-3-phosphate dehydrogenase cytosol* | YDL023C		yes	yes	-1.41038	-1.64501	-1.15748		-1.99819	-2.15756	-2.1393	-1.92847		0.0510766	-0.145623	-0.489969	-0.208788		1.53226	1.76815	1.532	1.53802		-0.157278	-0.036053	-0.136857		0.189754	-0.100539	-0.276958		0.801461	0.509262	0.510496		-0.412035	0.0619179	0.105679	0.884285	0.123629	0.203443		YDL022W	YDL022W iESR cluster GPD1 intracellular accumulation of glycerol-3-phosphate dehydrogenase cytosol* | YDL023C	-1.4027	-1.33374	-1.38296	0	-0.116688
YDL029W	YDL029W ... ARP2 actin filament organization* structural constituent of cytoskelemitochondrion* | YDL030W		.	yes	-0.028946	-0.369767	-0.442487		-0.667621	-0.799393	-0.549124	-0.593767		-0.207373	-0.434761	-1.08989	-0.277786		0.602792	0.44331	0.223492	0.271612		0.118931	0.122654	0.0431523		0.430474	0.377665	0.399106		0.337036	0.224139	0.401943		-0.216153	-0.240005	-0.187442	-0.158267	0.313797	0.17123		YDL029W	YDL029W ... ARP2 actin filament organization* structural constituent of cytoskelemitochondrion* | YDL030W	-0.527983	-0.329909	-0.286613	0	-0.161244
YDL066W	YDL066W ... IDP1 glutamate biosynthesis* isocitrate dehydrogenase (NADP+) acmitochondrion* | YDL067C		.	yes	-0.5757	-0.493994	-0.156801		-0.618682	-0.429425	-0.604841	-0.806159		0.165601	0.306656	0.0753383	-0.128699		0.220314	-0.0387947	0.203435	0.203666		-0.449	-0.405297	-0.346592		0.409392	0.288638	0.251499		0.239806	0.248278	0.162032		-0.207284	-0.149236	-0.615936	-0.796155	-0.300763	-0.211487		YDL066W	YDL066W ... IDP1 glutamate biosynthesis* isocitrate dehydrogenase (NADP+) acmitochondrion* | YDL067C	-0.551088	-0.925643	-0.637134	0	0.199103
YDL072C	YDL072C ... YET3 biological process unknown molecular function unknown endoplasmic reticulum | YDL073W		yes	yes	0.18053	0.548913	0.626874		-0.752487	-0.267535	-0.287788	-0.0392592		0.35347	0.286833	-0.0326993	0.365063		1.31875	1.0678	1.05106	0.942565		0.119905	0.152818	0.0346973		1.24886	1.13737	1.23542		1.27814	1.09627	1.29922		-0.0303371	-0.0389317	0.773982	0.717191	0.889327	0.96905		YDL072C	YDL072C ... YET3 biological process unknown molecular function unknown endoplasmic reticulum | YDL073W	0.182978	0.140568	-0.141324	0	0.611563
YDL082W	YDL082W RP cluster RPL13A protein biosynthesis structural constituent of ribosome cytosolic large ribosomal subunit ( | YDL083C		.	yes	-0.093846	-0.307271	-0.259269		-0.360855	-0.308952	-0.0944245	-0.71349		-1.02126	-0.627314	-0.460205	-0.56175		-0.344581	-0.798599	-0.450659	-0.156752		-0.22844	-0.0480886	-0.277846		-0.217763	0.081898	-0.152272		-0.0150836	-0.0176992	0.0202776		-0.24603	-0.35392	-1.08995	-1.11655	-0.660666	-0.661164		YDL082W	YDL082W RP cluster RPL13A protein biosynthesis structural constituent of ribosome cytosolic large ribosomal subunit ( | YDL083C	-2.20197	-1.88121	-1.00015	0	-3.11648
YDL110C	YDL110C Ö iESR cluster TMA17 biological process unknown molecular function unknown | Protein of unknown function that associates with ribosomes; heterozygous deletion demonstrated increases in chromosome instability in a rad9 deletion background; protein abundance is decreased upon intracellular iron depletionYDL111C		yes	yes	-0.020112	-0.764641	-0.736563		-1.42078	-0.694956	0.124958	-1.31558		-1.15739	-0.208333	-1.65948	-0.963077		1.25734	0.482838	0.823704	1.2574		-0.172513	0.593371	-0.125408		0.811949	0.934694	0.601436		1.20828	0.927627	1.2626		-0.727857	0.00469528	0.368815	0.214206	0.761414	1.25717		YDL110C	YDL110C Ö iESR cluster TMA17 biological process unknown molecular function unknown | Protein of unknown function that associates with ribosomes; heterozygous deletion demonstrated increases in chromosome instability in a rad9 deletion background; protein abundance is decreased upon intracellular iron depletionYDL111C	-1.01097	-1.01553	-0.849636	0	-1.12622
YDL124W	YDL124W iESR cluster YDL124W metabolism alpha-keto amide reductase activitycytoplasm* | YDL125C		yes	yes	0.265615	-0.127158	-0.115976		-0.245146	-0.917348	-0.0292129	-1.08112		-0.768351	0.0122179	0.147873	0.203001		2.81677	3.17931	3.33543	3.72618		0.193615	0.211374	0.181518		2.16245	1.00287	1.46709		3.13909	2.39135	2.70478		0.252195	0.214825	1.12302	0.603651	0.669528	0.532734		YDL124W	YDL124W iESR cluster YDL124W metabolism alpha-keto amide reductase activitycytoplasm* | YDL125C	-0.713468	-0.780752	-0.751021	0	0.201764
YDL137W	YDL137W ... ARF2 ER to Golgi transport* GTPase activity cytosol* | YDL138W		yes	yes	-0.701689	-0.663759	-0.557644		-1.31558	-0.774245	-0.586521	-1.10903		-0.442241	-0.142359	-0.0334997	-0.19107		0.896207	0.343587	0.301141	0.566872		0.162513	0.156449	0.0535151		0.737803	0.482001	0.516325		0.58267	0.363539	0.514749		-0.0865945	-0.250449	0.358138	0.561825	0.354313	0.215953		YDL137W	YDL137W ... ARF2 ER to Golgi transport* GTPase activity cytosol* | YDL138W	-1.1413	-1.17853	-0.800235	0	-0.118834
YDL204W	YDL204W iESR cluster RTN2 biological process unknown molecular function unknown endoplasmic reticulum | YDL205C		yes	yes	1.126	0.076291	0.403615		-0.961353	0.989542	0.833284	-0.0555841		-0.645494	-0.845763	1.59533	0.0489957		2.78201	1.60148	2.7955	2.98562		-0.0350093	0.569668	0.397247		2.27792	0.887388	1.23406		2.10893	0.925855	1.63277		-0.0369866	0.122532	0.846929	0.866282	2.68693	2.26828		YDL204W	YDL204W iESR cluster RTN2 biological process unknown molecular function unknown endoplasmic reticulum | YDL205C	-1.04097	-1.53427	-1.80117	0	0.988204
YDL223C	YDL223C ... HBT1 cellular morphogenesis during molecular function unknown mating projection | YDL224C		yes	yes	-0.001537	0.028779	0.035486		-1.24146	-1.55057	0.0972551	-0.69969		-0.785425	-0.964408	-1.28509	-0.484686		4.14458	4.27327	3.55185	3.88185		0.170971	0.332629	0.379181		1.64566	0.95643	1.17145		1.54007	1.12667	1.47737		0.196575	0.157059	1.827	1.42791	1.77407	1.54277		YDL223C	YDL223C ... HBT1 cellular morphogenesis during molecular function unknown mating projection | YDL224C	-1.20621	-1.75143	-2.17481	0	0.345159
YDL234C	YDL234C ... GYP7 vesicle-mediated transport Rab GTPase activator activity cytoplasm | YDL235C		yes	yes	0.315469	0.117098	0.141692		-0.00442142	-0.109993	0.145717	-0.331303		-0.633422	0.206704	-1.05376	-0.237772		1.07355	1.28692	1.35976	1.68156		-0.0244142	0.0191354	0.19652		1.14939	0.892761	1.07299		1.6054	1.29657	1.52217		0.00812166	-0.0211139	1.13864	0.991813	1.52754	1.46676		YDL234C	YDL234C ... GYP7 vesicle-mediated transport Rab GTPase activator activity cytoplasm | YDL235C	-0.362077	-0.020143	-0.026807	0	0.587567
YDR001C	YDR001C iESR cluster NTH1 response to stress* "alpha,alpha-trehalase activity" cytoplasm* | YDR002W		yes	yes	0.030723	-0.429325	-0.140285		-0.841058	-0.175088	-0.00767977	-0.417473		-0.347055	-0.125871	-0.337554	-0.156647		1.066	0.541859	0.535568	0.771407		0.415717	0.104248	0.0903991		1.37217	1.34138	1.64033		1.71198	1.7402	2.07405		-0.0253231	0.0714222	0.448646	0.480851	1.15909	1.21434		YDR001C	YDR001C iESR cluster NTH1 response to stress* "alpha,alpha-trehalase activity" cytoplasm* | YDR002W	-0.405081	-0.218439	-0.056544	0	-0.008307
YDR032C	YDR032C iESR cluster PST2 biological process unknown molecular function unknown cytoplasm* | YDR033W		.	yes	-0.063188	-0.155813	0.39556		-0.348869	-0.404563	-0.247876	-0.308685		0.207075	0.347085	0.26153	0.169353		0.51979	0.522151	0.236194	0.41241		0.276273	0.363478	0.380566		0.668458	0.684822	0.893556		0.51921	0.195776	0.449096		-0.171548	8.16e-05	0.136018	0.167991	0.908183	0.804567		YDR032C	YDR032C iESR cluster PST2 biological process unknown molecular function unknown cytoplasm* | YDR033W	-0.354133	-0.209148	-0.156049	0	0.115385
YDR033W	YDR033W ... MRH1 biological process unknown molecular function unknown mitochondrion* | YDR034C		.	yes	-2.92766	-2.69021	-2.50649		-2.13235	-2.09698	-2.39419	-2.29626		0.38038	0.448885	0.293856	0.327299		0.99482	0.859735	1.316	1.63101		0.0226853	-0.284476	-0.213356		0.171108	-0.321199	-0.2729		-0.35743	-0.0662743	-0.19642		-0.100671	-0.110602	-0.0643064	0.151075	-0.140463	-0.223042		YDR033W	YDR033W ... MRH1 biological process unknown molecular function unknown mitochondrion* | YDR034C	-1.22413	-1.1615	-1.29455	0	0.701397
YDR055W	YDR055W ... PST1 cell wall organization and bio molecular function unknown cell wall (sensu Fungi) | YDR056C		yes	yes	-0.409339	-0.259618	0.035589		-0.630461	-0.279378	-0.636047	-0.232655		0.453224	0.600255	0.176713	0.639716		1.38242	1.07679	1.33237	1.34234		0.359619	0.238868	0.0023527		1.54344	1.16106	1.23652		0.577884	0.649002	0.898934		-0.178156	-0.161175	0.7367	0.333733	1.72418	1.57042		YDR055W	YDR055W ... PST1 cell wall organization and bio molecular function unknown cell wall (sensu Fungi) | YDR056C	-0.707049	-0.766623	-0.599638	0	0.441601
YDR061W	YDR061W ... YDR061W biological process unknown "ATPase activity, coupled to transme"mitochondrion | YDR062W		.	yes	-0.633194	-0.942685	-0.937006		-1.21511	-0.720047	-0.85003	-1.20759		-1.01473	-1.08903	-0.840054	-0.718344		0.630906	-0.180127	-0.263236	0.313191		-0.0794034	-0.0596886	0.0120385		0.535664	0.281052	0.326074		0.422261	0.241211	0.393954		-0.161559	-0.145198	-0.537934	-0.985467	0.126078	0.0671324		YDR061W	YDR061W ... YDR061W biological process unknown "ATPase activity, coupled to transme"mitochondrion | YDR062W	-1.05927	-0.948555	-0.611979	0	-0.161182
YDR074W	YDR074W iESR cluster TPS2 response to stress* trehalose-phosphatase activity mitochondrion* | YDR075W		yes	yes	-0.205962	-0.346117	-0.309141		-0.934386	-0.784898	-0.561781	-0.636755		-0.540525	-0.41692	-0.538018	0.00938383		1.03589	0.66596	1.00697	1.1574		-0.139038	-0.109122	-0.160195		0.91959	0.872121	0.991859		1.27773	1.01235	1.22164		-0.476454	-0.195455	-0.0410929	-0.0284591	0.669283	0.561461		YDR074W	YDR074W iESR cluster TPS2 response to stress* trehalose-phosphatase activity mitochondrion* | YDR075W	-0.821764	-0.755637	-0.646568	0	-0.00025
YDR077W	YDR077W ... SED1 cell wall organization and bio structural constituent of cell wallmitochondrion* | YDR078C		yes	yes	0.429574	0.724594	0.911996		-0.710946	-0.541043	-0.741077	-0.46854		1.43384	1.35921	1.89686	1.27034		2.30458	2.02611	2.46312	2.09161		0.158693	-0.234412	0.00119592		4.97312	3.49993	3.64273		4.02255	3.64198	3.48505		-0.109509	0.169132	0.823966	1.72305	2.3321	2.17931		YDR077W	YDR077W ... SED1 cell wall organization and bio structural constituent of cell wallmitochondrion* | YDR078C	0	-0.749311	-1.02286	0	0.915422
YDR116C	YDR116C ... MRPL1 protein biosynthesis* structural constituent of ribosome mitochondrial large ribosomal subun | YDR117C		.	yes	-0.281875	-0.767965	-0.426896		-0.0682679	-1.10999	-0.685123	-0.919756		0.0617238	-0.607774	-0.295734	-0.335075		-0.275985	-0.263116	-0.345153	-0.182106		-0.469817	0.201541	-0.198754		0.41263	0.658569	0.558029		0.514603	-0.0867568	0.416674		-0.318068	-0.674894	-0.700702	-1.37159	0.149176	-0.0767915		YDR116C	YDR116C ... MRPL1 protein biosynthesis* structural constituent of ribosome mitochondrial large ribosomal subun | YDR117C	-0.956608	-0.855451	-1.12707	0	0.240384
YDR135C	YDR135C ... YCF1 response to metal ion* bilirubin transporter activity* vacuolar membrane | YDR136C		.	yes	-0.561737	-0.227424	-0.154527		-0.160052	0.0903053	-0.0834087	0.183597		-0.202204	0.129966	-0.0754352	-0.0248632		0.00401385	-0.0896872	-0.0239272	-0.00336808		0.320999	0.251441	0.184599		0.268935	0.354362	0.274584		0.0814454	0.231247	0.222607		0.0546478	0.0228851	-0.283976	-0.275152	-0.20288	-0.184882		YDR135C	YDR135C ... YCF1 response to metal ion* bilirubin transporter activity* vacuolar membrane | YDR136C	-0.179642	0.06143	-0.117831	0	0.394733
YDR171W	YDR171W iESR cluster HSP42 response to stress* unfolded protein binding cytoplasm* | YDR172W		yes	yes	0.785959	-1.46643	-0.405357		-0.420784	-2.22547	0.0447876	-0.530104		0.257644	-0.41692	0.147873	0.312729		1.53298	2.99741	1.66941	1.63418		-0.428853	0.848804	0.332693		0.795076	2.09828	1.85712		3.43149	2.29405	2.72512		0.092436	0.567943	1.9246	2.08108	1.49408	1.59151		YDR171W	YDR171W iESR cluster HSP42 response to stress* unfolded protein binding cytoplasm* | YDR172W	-0.388931	-0.6227	-0.658459	0	0.350154
YDR231C	YDR231C ... COX20 aerobic respiration* unfolded protein binding mitochondrial inner membrane | YDR232W		.	yes	-0.756218	-1.11028	-0.759282		-2.13128	-1.4885	-1.03767	-1.79572		-0.867887	-0.931493	-0.115161	-0.641149		0.59438	1.10844	0.401374	1.30814		-1.03758	-0.820837	-0.562502		-0.773013	0.0876866	-0.141491		0.770529	0.322688	0.162102		-0.239254	-0.0107348	-0.0693467		0.23929	0.0751091		YDR231C	YDR231C ... COX20 aerobic respiration* unfolded protein binding mitochondrial inner membrane | YDR232W	-1.1495	-1.14637	-1.04341	0	0.343936
YDR251W	YDR251W ... PAM1 pseudohyphal growth molecular function unknown bud neck* | YDR252W		yes	yes	-0.369859	-0.466136	-0.37881		-0.513894	-0.193517	-0.447654	-0.59955		-0.399211	0.023368	-0.596288	-0.374154		0.307641	0.0881302	0.071694	0.440893		0.139568	0.015435	-0.21819		0.372165	0.57435	0.310196		0.653465	0.614599	0.81923		-0.228081	-0.161507	-0.021574	-0.107722	0.284649	0.412144		YDR251W	YDR251W ... PAM1 pseudohyphal growth molecular function unknown bud neck* | YDR252W	-0.279342	-0.412477	-0.370073	0	0.293203
YDR258C	YDR258C iESR cluster HSP78 response to stress* ATPase activity* mitochondrial matrix | YDR259C		yes	yes	-0.358282	-0.946309	-0.690019		-0.212891	-1.43192	-0.701456	-1.32623		0.0732195	-0.0973019	-0.645676	0.67653		0.202062	1.26045	1.45747	1.7164		-0.0628205	0.0287231	-0.101687		0.988346	1.20551	1.33365		1.76292	1.35037	1.70966		-0.0457658	0.0531029	0.729142	0.808213	0.897862	1.03393		YDR258C	YDR258C iESR cluster HSP78 response to stress* ATPase activity* mitochondrial matrix | YDR259C	-0.539229	-0.721657	-0.735896	0	0.352243
YDR342C	YDR342C ... HXT7 hexose transport glucose transporter activity* mitochondrion* | YDR343C		yes	yes	-0.530114	-0.313132	0.051653		-1.93308	-1.9146	-1.926	-1.58379		1.29023	1.3876	1.73976	1.6594		1.31145	1.86662	1.96956	1.66893		1.00071	1.26969	0.0162589		5.73449	5.23467	4.61361		4.0427	3.55314	4.06474		-1.40037	-0.281788	-2.20957	-3.15793	1.64031	1.7649		YDR342C	YDR342C ... HXT7 hexose transport glucose transporter activity* mitochondrion* | YDR343C	-0.105157	-0.179989	0.141444	0	1.52941
YDR358W	YDR358W iESR cluster GGA1 Golgi to vacuole transport molecular function unknown Golgi trans face | YDR359C		yes	yes	0.470183	0.252001	-0.29782		-0.224387	-0.109993	0.0447876	-0.911194		-0.282924	0.113595	-0.230639	-0.21765		1.14692	0.897876	0.525363	1.51447		-0.216907	0.143704	0.0917384		1.31445	1.13066	0.953268		1.29574	0.894394	0.965717		-0.352041	0.0248006	0.444649	0.0221869	0.756359	0.935558		YDR358W	YDR358W iESR cluster GGA1 Golgi to vacuole transport molecular function unknown Golgi trans face | YDR359C	-0.192459	-0.612741	-0.324535	0	0.353586
YDR376W	YDR376W ... ARH1 iron ion homeostasis* NADPH-adrenodoxin reductase activitmitochondrial inner membrane | YDR377W		.	yes	-0.092718	-0.572897	-0.292643		-0.420784	-0.629367	-0.330424	-0.692554		-0.0543	-0.941111	-0.563622	-0.498744		0.331345	0.260446	0.103644	0.178503		0.173363	0.0408304	0.015478		0.0228953	0.241025	0.0836455		0.189713	0.288557	0.169974		-0.00385769	-0.372355	-0.281324	-0.570429	0.0665669	-0.0438989		YDR376W	YDR376W ... ARH1 iron ion homeostasis* NADPH-adrenodoxin reductase activitmitochondrial inner membrane | YDR377W	-0.561864	-0.598788	-0.731971	0	0.247785
YDR377W	YDR377W ... ATP17 ATP synthesis coupled proton t hydrogen-transporting ATP synthase proton-transporting ATP synthase co | YDR378C		.	yes	-1.04851	-1.20663	-0.935691		-1.48661	-1.19406	-1.00966	-1.52902		-0.373778	0.140562	0.20034	0.0750247		0.103745	0.406667	0.221356	0.428924		-0.188963	-0.112223	-0.0483746		0.507095	0.51329	0.537013		0.262212	0.0198251	0.142681		-0.12856	-0.116343	-0.236912	-0.630904	0.440785	0.477483		YDR377W	YDR377W ... ATP17 ATP synthesis coupled proton t hydrogen-transporting ATP synthase proton-transporting ATP synthase co | YDR378C	-0.901494	-1.70017	-1.07704	0	0.013763
YDR400W	YDR400W ... URH1 pyrimidine salvage* uridine nucleosidase activity cytoplasm* | YDR401W		.	yes	-0.124132	-0.009163	0.303322		-0.0551348	-0.198803	-0.315713	-0.181497		0.201061	0.114671	-0.0793608	0.108469		0.419061	0.766982	0.507333	0.710496		0.269429	0.377493	0.12105		0.212487	0.231209	0.364215		0.249453	0.0983905	0.460743		0.117771	0.0206563	0.470323	0.540961	-0.00753201	0.113295		YDR400W	YDR400W ... URH1 pyrimidine salvage* uridine nucleosidase activity cytoplasm* | YDR401W	-0.168075	0.027034	-0.010099	0	0.754434
YDR411C	YDR411C ... DFM1 biological process unknown* molecular function unknown endoplasmic reticulum | YDR412W		.	yes	-0.533377	-0.34264	-0.1516		-0.564463	-0.0947266	-0.332126	-0.273764		0.225223	0.33774	-0.0718577	-0.0458021		0.981761	0.788622	0.715671	0.818719		0.31983	0.16221	0.416582		0.131228	0.243953	0.185766		0.508221	0.182511	0.11182		-0.0586817	0.157751	0.743941	0.635328	0.131029	0.0940051		YDR411C	YDR411C ... DFM1 biological process unknown* molecular function unknown endoplasmic reticulum | YDR412W	-0.859904	-0.468531	-0.285328	0	-0.284995
YDR476C	YDR476C ... YDR476C biological process unknown molecular function unknown endoplasmic reticulum | YDR477W		.	yes	0.051543	0.330833	0.593066		0.263714	0.231044	-0.172443	0.322478		0.187255	0.244526	-0.899433	-0.208501		0.506249	0.882883	0.810765	0.424963		0.130258	0.191076	0.0808268		-0.0625197	-0.112612	-0.0667115		-0.290891	-0.125748	-0.149429		-0.361244	-0.0252316	-0.352618	0.743886	-0.234544	-0.0776013		YDR476C	YDR476C ... YDR476C biological process unknown molecular function unknown endoplasmic reticulum | YDR477W	0.337328	0.943235	0.278141	0	0.459928
YDR487C	YDR487C ... RIB3 aerobic respiration* "3,4-dihydroxy-2-butanone-4-phosphat"cytosol* | YDR488C		.	yes	0.083885	-0.038411	0.261476		-0.0796727	-0.332386	0.0278146	-0.238004		-0.0236815	-0.0775788	-0.860589	0.0630614		0.139052	0.199045	-0.121966	0.182518		-0.36141	-0.314332	-0.207343		-0.425947	-0.275873	-0.0949871		0.18272	-0.090451	-0.128077		-0.0953624	0.00293631	-0.779059	-0.342882	0.00545572	-0.0031288		YDR487C	YDR487C ... RIB3 aerobic respiration* "3,4-dihydroxy-2-butanone-4-phosphat"cytosol* | YDR488C	-0.789663	-0.949857	-0.138485	0	-1.05235
YDR497C	YDR497C ... ITR1 myo-inositol transport myo-inositol transporter activity membrane | YDR498C		.	yes	-0.73405	-0.70802	-0.398988		-0.469979	-0.556676	-0.503469	-0.188676		0.296434	0.143168	0.125505	0.234995		0.350454	0.487816	0.300744	0.285944		0.165586	0.0233837	0.107181		0.515396	0.343192	0.447294		0.220066	0.243525	0.265806		-0.397222	-0.187153	-0.547768	-0.412336	-0.0163502	0.0229825		YDR497C	YDR497C ... ITR1 myo-inositol transport myo-inositol transporter activity membrane | YDR498C	0.049258	0.110853	-0.585	0	0.960755
YDR502C	YDR502C ... SAM2 methionine metabolism methionine adenosyltransferase acticellular component unknown | YDR503C		.	yes	-0.209677	-0.355475	-0.226724		-0.162987	0.239014	0.0664217	0.0702062		0.132113	0.36328	-0.0551239	0.121232		0.331345	0.0350695	0.0958481	0.0634322		-0.198724	-0.396884	-0.241225		0.636378	0.217636	0.353376		0.460815	0.356163	0.506909		-0.480093	-0.552144	-1.70079	-1.20421	-0.459703	-0.483174		YDR502C	YDR502C ... SAM2 methionine metabolism methionine adenosyltransferase acticellular component unknown | YDR503C	-0.050945	-0.011159	0.144955	0	0.285515
YDR518W	YDR518W ... EUG1 protein folding protein disulfide isomerase activitendoplasmic reticulum | YDR519W		.	yes	-0.12882	0.288605	0.35817		0.380436	-0.0319908	0.146233	0.0840834		-0.20417	-0.193383	-0.245042	-0.256379		0.276204	0.482838	0.260992	0.552925		0.361262	0.42174	0.130689		0.396912	0.320347	0.00569835		0.232281	0.256739	0.361853		-0.00511843	-0.0678202	0.726947	0.689067	0.323237	0.333085		YDR518W	YDR518W ... EUG1 protein folding protein disulfide isomerase activitendoplasmic reticulum | YDR519W	0.338838	0.423539	0.210261	0	0.616732
YDR519W	YDR519W ... FPR2 biological process unknown peptidyl-prolyl cis-trans isomeraseendoplasmic reticulum membrane | YDR520C		.	yes	-0.252034	-0.410575	0.190976		-0.192678	-0.247497	-0.344424	-0.0811192		0.210116	0.0669448	-0.195535	0.0622925		0.99365	0.563009	0.60503	0.690937		0.375419	0.168553	0.520639		0.45884	0.2659	0.369179		0.280052	0.094888	0.0625659		0.183889	0.202011	0.627361	-0.0796491	-0.031102	0.215151		YDR519W	YDR519W ... FPR2 biological process unknown peptidyl-prolyl cis-trans isomeraseendoplasmic reticulum membrane | YDR520C	-1.21337	-1.05629	-0.352443	0	-1.35291
YDR533C	YDR533C iESR cluster HSP31 biological process unknown unfolded protein binding* soluble fraction | YDR534C		.	yes	-0.040011	-0.047444	-0.20051		0.0386473	-0.302638	-0.169337	0.166808		-0.604852	0.28352	0.196783	0.773888		1.14692	1.62302	0.844981	1.66754		-0.142765	0.236653	0.085039		1.06934	0.932242	0.443926		0.0281296	-0.0979913	0.244908		-0.222657	-0.278592	0.2599	0.133832	0.301803	-0.0714414		YDR533C	YDR533C iESR cluster HSP31 biological process unknown unfolded protein binding* soluble fraction | YDR534C	-0.769987	-0.928776	-1.35471	0	0.069159
YDR539W	YDR539W ... YDR539W biological process unknown molecular function unknown cytoplasm | YDR540C		.	yes	-0.23834	0.196693	0.392224		0.245098	0.330579	0.200066	1.2523		-0.398402	0.0611275	-0.989631	0.704348		1.18999	0.597481	0.664204	0.68665		0.745025	1.15331	0.081354		-0.100588	0.457704	-0.0211969		0.236847	-0.0578427	0.340439		-0.0901599	-0.020545	-0.641393	-0.202565	-0.407066	-0.0713981		YDR539W	YDR539W ... YDR539W biological process unknown molecular function unknown cytoplasm | YDR540C	2.18014	0.239533	-2.18126	0	0.129736
YEL012W	YEL012W iESR cluster UBC8 protein monoubiquitination* ubiquitin conjugating enzyme activicytoplasm | YEL013W		yes	yes	0.144413	0.86372	-0.105796		-0.768708	-0.109993	-0.0706896	-0.911194		-1.67524	0.224626	-0.230639	-0.973724		0.59438	-0.0614823	0.488837	1.14608		0.490452	0.875771	0.993891		1.48437	2.15042	1.89307		1.62119	1.57495	1.10855		-0.409179	0.586084	0.587766	0.565549	0.548241	1.06388		YEL012W	YEL012W iESR cluster UBC8 protein monoubiquitination* ubiquitin conjugating enzyme activicytoplasm | YEL013W	0	0	-0.28426	0	-0.251452
YEL058W	YEL058W ... PCM1 N-acetylglucosamine biosynthes phosphoacetylglucosamine mutase actcytoplasm* | YEL059C-A		yes	yes	0.486553	0.284908	0.813196		0.338608	0.337834	0.224623	0.439604		0.929357	0.484433	0.709983	0.580211		0.972491	0.651991	0.719557	0.616523		0.0559126	0.111246	0.0417858		1.31445	1.02326	0.985888		0.930163	0.798796	0.848543		-0.00321708	0.114459	0.200785	0.251915	0.778666	0.782552		YEL058W	YEL058W ... PCM1 N-acetylglucosamine biosynthes phosphoacetylglucosamine mutase actcytoplasm* | YEL059C-A	0.382758	0.20309	0.444983	0	0.687782
YEL060C	YEL060C iESR cluster PRB1 sporulation* serine-type endopeptidase activity vacuole (sensu Fungi)* | YEL061C		yes	yes	0.125839	-0.010749	0.148757		0.0386473	0.190052	0.0219477	0.443738		-0.00202351	0.0734847	0.0078494	-0.0318455		1.42277	1.56335	1.45257	1.24653		0.541206	0.705621	0.663218		1.49651	1.32568	1.61308		1.61835	1.42448	1.72025		0.194505	0.394129	1.27092	1.7819	1.24382	1.25189		YEL060C	YEL060C iESR cluster PRB1 sporulation* serine-type endopeptidase activity vacuole (sensu Fungi)* | YEL061C	-0.067412	-0.032005	-0.001048	0	0.29318
YER003C	YER003C ... PMI40 protein amino acid glycosylati mannose-6-phosphate isomerase activcytoplasm* | YER004W		.	yes	-0.482856	-0.348343	-0.059087		-0.316112	-0.303914	-0.456075	-0.416666		0.395148	0.194569	-0.075456	0.071992		0.480541	0.399804	0.36198	0.56328		-0.0561033	0.0429581	-0.0622338		-0.170977	0.162273	0.0250726		0.171519	0.0908554	0.0554663		-0.0508379	-0.21757	0.241545	-0.0702195	-0.0724731	-0.0975641		YER003C	YER003C ... PMI40 protein amino acid glycosylati mannose-6-phosphate isomerase activcytoplasm* | YER004W	-0.434865	-0.545447	-0.443473	0	-0.129983
YER062C	YER062C ... HOR2 response to osmotic stress* glycerol-1-phosphatase activity cytoplasm* | YER063W		yes	yes	-1.05219	-0.909109	-1.01758		-2.39431	-2.9513	-1.98624	-2.52169		-1.71588	-1.07236	-0.499825	-1.10207		1.97289	2.99741	2.29918	2.37115		0.553726	0.374577	0.0159174		1.60396	1.17118	0.910632		1.05828	1.25784	1.27917		-0.00940081	-0.216295	0.61715	0.499044	1.00125	0.622982		YER062C	YER062C ... HOR2 response to osmotic stress* glycerol-1-phosphatase activity cytoplasm* | YER063W	-0.661685	-1.04371	-1.05579	0	-0.248203
YER063W	YER063W ... THO1 transcription, DNA-dependent molecular function unknown nucleus | YER064C		.	yes	-0.600899	-0.962005	-0.862642		-0.698318	-0.984462	-1.2332	-1.64455		0.132113	-0.105522	0.0398132	-0.498492		0.511918	-0.00258863	0.0737992	0.247365		-0.362503	0.128158	-0.0491776		-0.141002	0.384888	0.26638		0.535801	0.141989	0.251864		-0.174159	-0.478703	-0.416979	-0.691883	0.328409	-0.126781		YER063W	YER063W ... THO1 transcription, DNA-dependent molecular function unknown nucleus | YER064C	-1.43322	-1.57388	-1.09768	0	-0.870337
YER065C	YER065C ... ICL1 glyoxylate cycle isocitrate lyase activity cellular component unknown | YER066C-A		.	yes	0.375026	-0.32441	0.684902		-0.726887	-0.801871	0.551748	-0.0687354		-1.14799	-0.845763	0.806836	-0.542199		0.494844	0.367361	0.64084	0.509772		0.0360738	0.683126	-0.80581		2.86699	-0.418715	-0.200746		0.7588	-0.630732	0.846662		-0.529572	-0.208488	0.228215	-1.10972	0.31003	0.388609		YER065C	YER065C ... ICL1 glyoxylate cycle isocitrate lyase activity cellular component unknown | YER066C-A	0.688665	-0.312543	0.038332	0	2.3102
YER069W	YER069W ... ARG5,6 arginine biosynthesis* N-acetyl-gamma-glutamyl-phosphate rmitochondrial matrix | YER070W		.	yes	-0.723059	-0.562021	-0.522829		-0.945923	-0.597931	-0.732018	-0.863011		0.320875	-0.329309	0.108033	0.194519		0.847146	0.0321768	0.48241	0.605426		-1.49603	-1.17352	-1.26804		-1.04117	-1.19626	-1.34726		0.0457321	-0.216284	-0.201896		-0.177981	-0.106744	-0.273741	-0.0555721	-0.946778	-0.964324		YER069W	YER069W ... ARG5,6 arginine biosynthesis* N-acetyl-gamma-glutamyl-phosphate rmitochondrial matrix | YER070W	-1.79253	-1.63669	-1.54992	0	0.020664
YER077C	YER077C ... YER077C biological process unknown molecular function unknown mitochondrion | YER078C		.	yes	0.038646	0.056612	-0.232383		0.102778	-0.984462	-0.299167	-1.14033		-0.157393	-0.834875	-1.57459	-0.844089		0.186295	0.177984	-0.0595999	0.674775		-0.102434	0.0582492	-0.230982		0.570941	0.992855	0.75393		0.43776	0.589572	0.71406		0.107677	-0.0594767	0.524528	0.0131869	0.849629	0.823588		YER077C	YER077C ... YER077C biological process unknown molecular function unknown mitochondrion | YER078C	-0.019358	-0.541016	-0.36421	0	0.469641
YER079W	YER079W iESR cluster YER079W biological process unknown molecular function unknown cytoplasm* | YER080W		yes	yes	-0.799004	-1.54324	-1.68212		-1.28328	-3.43192	-3.27714	-2.84979		0.132113	-2.36034	0.147873	-0.760321		1.00942	1.26045	3.90387	2.34961		0.505559	-0.124229	-0.00610888			0.735385	1.23256		1.28415	1.22131	1.15918		-0.898217	-0.090462	-0.377469	-1.59315	1.16755	0.979185		YER079W	YER079W iESR cluster YER079W biological process unknown molecular function unknown cytoplasm* | YER080W	0	0	-0.391291	0	-1.02394
YER081W	YER081W ... SER3 serine family amino acid biosy phosphoglycerate dehydrogenase acticytoplasm | YER082C		yes	yes	1.1265	0.636141	0.641167		0.975912	0.413569	0.290639	0.0806319		-0.293193	-0.494088	-0.875974	-0.492314		0.0874197	0.218011	0.30723	0.346159		-0.219128	0.0226126	-0.163445		0.362471	0.506298	0.3965		1.19215	1.00408	1.10749		0.378051	0.546625	-0.116923	-0.0658254	0.0533722	-0.00359112		YER081W	YER081W ... SER3 serine family amino acid biosy phosphoglycerate dehydrogenase acticytoplasm | YER082C	-0.134646	0.332826	0.337065	0	0.28793
YER087C-B	YER087C-B ... SBH1 SRP-dependent cotranslational protein transporter activity* translocon complex* | YER087W		.	yes	-0.303046	-0.078192	0.12318		-0.213416	-0.763543	-0.140282	-0.561927		0.0175534	-0.297326	-0.069801	0.111523		0.0609475	0.260446	0.144572	0.404782		-0.100732	-0.0609262	0.011813		-0.297993	0.131906	0.451291		0.16123	0.00134565	0.212534		-0.0711367	-0.00303568	0.152523	-0.269854	-0.183604	-0.0153557		YER087C-B	YER087C-B ... SBH1 SRP-dependent cotranslational protein transporter activity* translocon complex* | YER087W	-0.568555	-0.177474	-0.523473	0	0.104868
YER136W	YER136W ... GDI1 vesicle-mediated transport Rab GDP-dissociation inhibitor actimembrane fraction* | YER137C		.	yes	-0.068503	0.039079	-0.216897		-0.00540788	-0.125341	0.182534	-0.493374		-0.619389	-0.343263	-0.282412	-0.385671		-0.22045	0.139816	-0.101	0.46472		0.188275	0.154569	0.132352		0.251256	0.247258	0.441486		0.527553	0.38163	0.541248		-0.0869246	-0.0947644	0.0329204	-0.0128271	-0.00190424	0.0310563		YER136W	YER136W ... GDI1 vesicle-mediated transport Rab GDP-dissociation inhibitor actimembrane fraction* | YER137C	-0.235091	-0.07866	0.002312	0	-0.087657
YFL014W	YFL014W iESR cluster HSP12 response to oxidative stress* molecular function unknown cytoplasm* | YFL015C		yes	yes	-1.91448	0.211643	-1.1516		-4.04882		-1.69218	-4.66608		-1.14799	-2.62337	1.14787	-0.898537		6.66763		6.86966	8.95344				-0.00610888				4.53339		7.20954	4.99781	5.85962		0.499314	0.733688	4.54329	4.1696	5.26629	4.76269		YFL014W	YFL014W iESR cluster HSP12 response to oxidative stress* molecular function unknown cytoplasm* | YFL015C	-3.30087	-4.4774	-4.59641	0	-0.67587
YFR006W	YFR006W ... YFR006W biological process unknown X-Pro aminopeptidase activity cytoplasm | YFR007W		.	yes	-0.381529	-0.335938	-0.551574		-0.464677	-0.621246	-0.534957	-0.821927		-0.717861	-0.348748	0.0242416	-0.366507		-0.0623735	-0.349608	-0.176445	0.122521		-0.0771878	0.0782194	0.0751414		0.612531	0.468598	0.500626		0.48877	0.263976	0.462317		-0.414972	-0.179944	-0.513623	-0.628456	-0.123503	-0.015751		YFR006W	YFR006W ... YFR006W biological process unknown X-Pro aminopeptidase activity cytoplasm | YFR007W	-0.752025	-0.778742	-0.805259	0	-0.072634
YFR041C	YFR041C ... ERJ5 biological process unknown molecular function unknown endoplasmic reticulum | YFR042W		.	yes	-0.112161	-0.207246	-0.2256		-0.141925	-0.109993	0.395695	-0.773691		-0.495918	-0.7583	-1.05376	-0.511381		0.528791	-0.224981	0.18591	0.792003		0.275191	-0.0192593	0.202705		0.77288	0.675167	0.491009		0.411072	0.696929	0.361931		0.259059	-0.0425836	0.614293	-0.387959	0.344432	-0.0195559		YFR041C	YFR041C ... ERJ5 biological process unknown molecular function unknown endoplasmic reticulum | YFR042W	-0.402027	-0.396788	-0.377892	0	0.125575
YFR044C	YFR044C Ö DUG1 biological process unknown molecular function unknown | Cys-Gly metallo-di-peptidase; forms a complex with Dug2p and Dug3p to degrade glutathione (GSH) and other peptides containing a gamma-glu-X bond in an alternative pathway to GSH degradation by gamma-glutamyl transpeptidase (Ecm38p)YFR045W		.	yes	-0.366499	-0.152504	0.170195		-0.358775	-0.240078	-0.558605	-0.165676		0.503975	0.347483	0.147873	0.489667		0.370949	0.377649	0.47383	0.357818		0.0110078	-0.045115	0.100732		0.54274	0.369492	0.441939		-0.161477	-0.119664	-0.23083		-0.108312	-0.0965604	-0.277778	-0.106075	0.062366	-0.212603		YFR044C	YFR044C Ö DUG1 biological process unknown molecular function unknown | Cys-Gly metallo-di-peptidase; forms a complex with Dug2p and Dug3p to degrade glutathione (GSH) and other peptides containing a gamma-glu-X bond in an alternative pathway to GSH degradation by gamma-glutamyl transpeptidase (Ecm38p)YFR045W	-0.236708	-0.402694	-0.457389	0	0.095204
YGL006W	YGL006W iESR cluster PMC1 calcium ion homeostasis* calcium-transporting ATPase activitvacuolar membrane (sensu Fungi) | YGL006W-A		.	yes	-0.284985	-0.126738	0.109254		-0.277537	0.0685448	0.147762	0.115097		-1.04744	-0.807403	-0.153543	-0.546577		0.246746	-0.290569	-0.105776	0.15523		0.294795	0.3161	0.160168		0.602955	0.136048	0.00921947		0.172041	0.230902	0.281315		0.130128	0.0330831	0.574313	0.695455	0.672186	0.690604		YGL006W	YGL006W iESR cluster PMC1 calcium ion homeostasis* calcium-transporting ATPase activitvacuolar membrane (sensu Fungi) | YGL006W-A	-0.013815	0.028936	-0.137496	0	0.29698
YGL037C	YGL037C iESR cluster PNC1 chromatin silencing at telomer nicotinamidase activity cytoplasm* | YGL038C		yes	yes	0.027965	-0.939903	-0.427235		-1.07953	-1.65596	-1.05757	-1.29541		-0.789031	-0.673644	-0.304986	-0.362659		1.19102	1.93852	1.60649	1.48793		0.621036	0.985396	0.578854		1.57748	2.67838	2.72604		2.78129	2.42798	2.65371		-0.40333	0.0530547	0.274198	0.595612	1.06286	1.06647		YGL037C	YGL037C iESR cluster PNC1 chromatin silencing at telomer nicotinamidase activity cytoplasm* | YGL038C	-0.670353	-0.509089	-0.90972	0	0.412906
YGL084C	YGL084C ... GUP1 glycerol transport* O-acyltransferase activity endoplasmic reticulum* | YGL085W		.	yes	-0.66403	-0.545028	-0.31852		-0.636257	-0.575657	-0.63064	-0.188113		0.132113	-0.0843578	0.388117	0.223879		0.510428	0.0881768	0.224745	0.202699		-0.046497	-0.0188025	-0.136693		0.285793	0.0497702	-0.0801869		-0.173044	-0.150046	-0.13359		-0.298387	-0.200075	-0.013784	0.0616529	0.0234969	0.104254		YGL084C	YGL084C ... GUP1 glycerol transport* O-acyltransferase activity endoplasmic reticulum* | YGL085W	-0.767997	-0.613914	-0.728393	0	0.280345
YGL156W	YGL156W iESR cluster AMS1 carbohydrate metabolism alpha-mannosidase activity vacuolar membrane | YGL157W		yes	yes	1.28192	1.28964	1.31789		1.03865	-1.33239	-0.592642	0.226309		0.132113	-0.845763	-0.337554	0.621885		4.26994	5.50837	5.16858	4.13711		0.827487	0.254283	1.05802		3.14042	1.73538	2.35226		2.90395	2.5528	2.32982		0.19049	0.42639	2.41069	2.74127	1.94003	2.20516		YGL156W	YGL156W iESR cluster AMS1 carbohydrate metabolism alpha-mannosidase activity vacuolar membrane | YGL157W	-0.90823	-1.57519	-0.911252	0	0.704798
YGL157W	YGL157W ... YGL157W biological process unknown oxidoreductase activity* cytoplasm* | YGL158W		yes	yes	0.303576	0.11245	0.1084		0.307834	-0.149522	0.213387	-0.620852		-0.629727	-0.340971	-1.12713	-0.449585		0.794678	0.762946	0.849834	1.35907		0.0885412	0.151603	-0.0133769		0.965555	0.850629	0.688692		1.12137	1.17692	1.04647		-0.222018	-0.0309142	0.439392	0.508422	0.385179	0.598363		YGL157W	YGL157W ... YGL157W biological process unknown oxidoreductase activity* cytoplasm* | YGL158W	0.659125	0.699448	0.643207	0	1.16868
YGL187C	YGL187C ... COX4 aerobic respiration* cytochrome-c oxidase activity respiratory chain complex IV (sensu | YGL188C		.	yes	-0.990086	-1.31454	-0.661589		-1.30133	-1.25748	-1.21589	-1.32529		0.0331467	0.0535701	-0.057446	0.183332		0.198274	0.199045	0.29938	0.240042		-0.489542	-0.600982	-0.67098		0.000909455	0.143559	0.138786		-0.164054	-0.117278	-0.354217		-0.442229	-0.516173	-0.878564	-0.632678	-0.136886	-0.172818		YGL187C	YGL187C ... COX4 aerobic respiration* cytochrome-c oxidase activity respiratory chain complex IV (sensu | YGL188C	-0.870647	-1.01227	-0.991534	0	-0.25261
YGL220W	YGL220W Ö FRA2 biological process unknown molecular function unknown | Protein involved in negative regulation of transcription of iron regulon; forms an iron independent complex with Fra2p, Grx3p, and Grx4p; null mutant fails to repress iron regulon and is sensitive to nickelYGL221C		.	yes	-0.237225	0.266476	0.136832		-0.224387	-0.508543	0.109178	0.105485		-0.21581	-0.550614	0.311799	0.0398802		0.255174	0.238419	0.0246264	0.134477		-0.184373	-0.0909087	0.286673		0.329557	-0.0148753	0.514856		-0.00564653	-0.0855683	-0.0281104		-0.042562	-0.114309	0.163871	0.0610759	-0.143607	-0.301937		YGL220W	YGL220W Ö FRA2 biological process unknown molecular function unknown | Protein involved in negative regulation of transcription of iron regulon; forms an iron independent complex with Fra2p, Grx3p, and Grx4p; null mutant fails to repress iron regulon and is sensitive to nickelYGL221C	-0.817059	-1.1251	-0.493398	0	-0.932959
YGL242C	YGL242C ... YGL242C biological process unknown molecular function unknown cellular component unknown | YGL243W		yes	yes	0.160287	0.051603	0.026843		-0.723193	-0.557452	0.192886	-0.816557		-1.45285	-0.552981	0.0677026	-0.312047		0.530249	0.122942	-0.13175	0.859117		0.25224	-0.216021	0.386806		1.21352	0.43903	0.991294		0.684435	0.894891	0.740512		-0.0771781	-0.109981	0.287498	-0.268714	0.675127	0.441123		YGL242C	YGL242C ... YGL242C biological process unknown molecular function unknown cellular component unknown | YGL243W	-0.671136	-0.747392	-0.367173	0	-0.774517
YGR019W	YGR019W iESR cluster UGA1 nitrogen utilization 4-aminobutyrate transaminase activiintracellular | YGR020C		yes	yes	0.440614	-0.196822	0.33595		-0.0738274	-0.351001	-0.0536161	-0.171584		-0.331834	0.618704	-0.453031	-0.326871		1.20935	2.0678	1.17396	1.43624		0.152327	-0.323538	-0.101266		0.439981	0.129589	0.468608		1.3065	1.28771	1.27691		-0.0500169	0.251387	0.354148	0.567315	0.325456	0.337978		YGR019W	YGR019W iESR cluster UGA1 nitrogen utilization 4-aminobutyrate transaminase activiintracellular | YGR020C	0.005167	-0.145309	-0.32064	0	0.163412
YGR037C	YGR037C ... ACB1 fatty acid metabolism* long-chain fatty acid transporter acytoplasm* | YGR038W		.	yes	-0.464796	-0.695056	-0.484621		-1.34685	-1.30591	-1.01973	-1.22404		-0.762394	-0.675838	-0.832188	-0.49252		0.491126	0.52348	0.304594	0.442256		0.175215	0.36591	0.349053		-0.359518	0.0487218	0.0438167		0.115616	0.0764323	0.176847		0.0163887	0.117783	0.389696	-0.0345328	-0.22905	-0.0639047		YGR037C	YGR037C ... ACB1 fatty acid metabolism* long-chain fatty acid transporter acytoplasm* | YGR038W	0.194874	-0.590305	-1.25393	0	0.767228
YGR043C	YGR043C Ö iESR cluster NQM1 biological process unknown transaldolase activity | Transaldolase of unknown function; transcription is repressed by Mot1p and induced by alpha-factor and during diauxic shiftYGR044C		yes	yes	1.41942	1.21164	-0.344245			-0.109993	0.0447876	1.08881			0.961592		0.856351			5.01533	4.46866	5.80559		1.24252	2.1977	0.578854		2.89941	2.88739	0.853272		2.0442	1.22131	1.78591		1.18233	1.27608	3.23762	3.33974	2.63412	2.91207		YGR043C	YGR043C Ö iESR cluster NQM1 biological process unknown transaldolase activity | Transaldolase of unknown function; transcription is repressed by Mot1p and induced by alpha-factor and during diauxic shiftYGR044C	-1.32385	-2.3029	-2.8156	0	-0.236156
YGR055W	YGR055W ... MUP1 sulfur amino acid transport L-methionine porter activity integral to plasma membrane | YGR056W		.	yes	-1.28227	-0.98072	-0.684308		-1.00106	-0.924661	-0.891243	-0.704832		0.255162	0.0327528	0.142928	0.218625		0.466505	0.474669	0.323038	0.322516		-0.147867	-0.285777	-0.317851		-0.49004	-0.508444	-0.628442		-0.850522	-0.655461	-0.714422		-0.498233	-0.376013	-0.401879	-0.411805	-0.500997	-0.489752		YGR055W	YGR055W ... MUP1 sulfur amino acid transport L-methionine porter activity integral to plasma membrane | YGR056W	0.150576	-0.156402	-0.411672	0	0.587076
YGR080W	YGR080W ... TWF1 bipolar bud site selection* actin monomer binding actin cortical patch | YGR081C		.	yes	0.106581	-0.390136	-0.181043		-0.475926	-0.401759	-0.769997	-0.810667		-0.730383	-1.43327	-0.0195838	-0.766282		0.171689	-0.105682	0.506115	0.540799		-0.104746	-0.0166489	0.127984		-0.0511997	0.345973	0.289445		0.481503	0.404648	0.452507		-0.602736	-0.273803	-0.23104	-0.652043	0.133972	0.273358		YGR080W	YGR080W ... TWF1 bipolar bud site selection* actin monomer binding actin cortical patch | YGR081C	-0.216033	-0.3188	-0.244609	0	0.11935
YGR084C	YGR084C ... MRP13 protein biosynthesis structural constituent of ribosome mitochondrial small ribosomal subun | YGR085C		.	yes	0.149105	-0.606333	-0.425522		-1.6703	-0.952452	-0.530715	-1.61717		-1.52239	-0.738848	-0.318695	-0.876935		0.39644	-0.597535	-0.559098	0.146081		-0.508116	-0.160755	-0.312948		-0.369077	0.576687	0.254144		0.631126	0.316731	0.0588618		-0.3445	-0.0116621	-0.814518	-1.97973	-0.10857	0.389617		YGR084C	YGR084C ... MRP13 protein biosynthesis structural constituent of ribosome mitochondrial small ribosomal subun | YGR085C	-1.173	-1.30788	-1.20327	0	0.002446
YGR088W	YGR088W iESR cluster CTT1 response to stress catalase activity cytoplasm | YGR089W		yes	yes	-0.339571	-0.254925	-0.429901		-1.44678	-1.05341	-0.454783	-0.992114		-0.675242	-0.360336	-0.887751	-0.143649		3.55785	3.3929	3.27951	4.18588		0.590448	0.361198	0.100806		0.439981	1.02489	0.832952		0.835485	0.813887	1.55183		-0.22218	-0.137398	1.62667	2.01199	1.42198	1.63937		YGR088W	YGR088W iESR cluster CTT1 response to stress catalase activity cytoplasm | YGR089W	-1.03221	-2.65308	-3.50292	0	-0.324711
YGR097W	YGR097W ... ASK10 response to oxidative stress* transcription regulator activity cytoplasm* | YGR098C		yes	yes	0.756782	1.03449	0.789124		0.674491	0.753071	0.745555	0.510744		0.186561	0.53515	0.0188559	0.319013		0.33989	-0.0367144	0.194571	0.516171		-0.0456883	0.0576918	-0.181141		0.880991	1.02356	0.883993		1.1376	0.998352	1.25601		0.0613181	-0.0520637	0.537438	0.422618	1.04149	1.00641		YGR097W	YGR097W ... ASK10 response to oxidative stress* transcription regulator activity cytoplasm* | YGR098C	0.786633	0.581263	0.677359	0	1.22388
YGR157W	YGR157W ... CHO2 phosphatidylcholine biosynthes phosphatidylethanolamine N-methyltrendoplasmic reticulum | YGR158C		.	yes	-0.648329	-0.39306	-0.104069		-0.55075	-0.466836	-0.541851	-0.529736		-0.0304842	0.108433	-0.0964053	0.0338108		0.010628	-0.0741191	-0.0756939	0.162361		0.107606	-0.032884	-0.188476		0.840135	0.835993	0.602414		0.373489	0.451977	0.576928		-0.202031	-0.328909	-0.223983	-0.384582	-0.143073	-0.222178		YGR157W	YGR157W ... CHO2 phosphatidylcholine biosynthes phosphatidylethanolamine N-methyltrendoplasmic reticulum | YGR158C	-0.989652	-1.05836	-0.840714	0	0.757899
YGR161C	YGR161C iESR cluster RTS3 protein amino acid dephosphory protein phosphatase type 2A activitcytoplasm* | YGR161W-C		yes	yes	0.890726	0.411942	0.736755		0.360575	-0.917348	0.423299	0.659122		0.795078	-0.730286	0.147873	0.0973587		2.03326	3.05052	2.27668	1.94846		-0.242902	0.0310494	-0.137353		0.869665	1.1284	1.3741		2.07104	1.51349	1.93125		-0.171156	0.142925	1.43371	1.74059	1.6364	1.63986		YGR161C	YGR161C iESR cluster RTS3 protein amino acid dephosphory protein phosphatase type 2A activitcytoplasm* | YGR161W-C	-1.31358	-0.616252	0.365867	0	-1.24355
YGR189C	YGR189C ... CRH1 biological process unknown molecular function unknown cell wall (sensu Fungi)* | YGR190C		yes	yes	0.146686	0.249845	0.46618		-0.163096	-0.0767309	-0.163988	0.127193		1.00877	0.813323	0.806061	0.793762		1.43948	1.29897	1.35972	1.20058		0.182957	0.0640254	0.0191111		0.978746	0.819977	0.947792		0.938538	0.67933	0.941578		-0.00199395	0.0482083	0.793359	0.639203	1.39739	1.25862		YGR189C	YGR189C ... CRH1 biological process unknown molecular function unknown cell wall (sensu Fungi)* | YGR190C	0.3915	0.429191	0.013522	0	1.12282
YGR244C	YGR244C ... LSC2 tricarboxylic acid cycle* succinate-CoA ligase (ADP-forming) mitochondrion | YGR245C		yes	yes	-0.755643	-0.931132	-1.47154		-1.79534	-1.37303	-1.1101	-1.97577		-0.610729	-0.254137	-0.591975	-0.000416514		1.86089	1.5033	1.39615	1.75122		0.313144	0.343377	0.0586383		1.62961	1.16118	1.08369		1.85272	1.70553	1.79536		-0.117347	-0.0651099	0.701758	0.42252	1.09053	1.07539		YGR244C	YGR244C ... LSC2 tricarboxylic acid cycle* succinate-CoA ligase (ADP-forming) mitochondrion | YGR245C	-0.840971	-0.944712	-1.16277	0	0.658811
YGR250C	YGR250C iESR cluster YGR250C biological process unknown RNA binding cytoplasm | YGR251W		yes	yes	1.12839	1.33069	1.51353		-0.232655	-0.109993	0.296326	0.00750575		-0.675242	0.183984	1.19296	0.643806		1.28072	0.938518	0.987939	1.40467		0.184974	0.508039	0.379782		0.875028	1.08453	1.21759		1.08857	0.840582	1.07343		0.1558	0.0397836	0.473729	-0.0932903	0.787524	0.703153		YGR250C	YGR250C iESR cluster YGR250C biological process unknown RNA binding cytoplasm | YGR251W	0.423068	-0.006391	0.121585	0	0.890298
YGR254W	YGR254W ... ENO1 glycolysis* phosphopyruvate hydratase activity cytoplasm* | YGR255C		yes	yes	-0.236761	-0.276707	0.296287		-1.37446	-1.34185	-1.17247	-0.85611		0.431854	0.542507	0.408848	0.731965		2.1802	2.74384	2.13801	2.43417		-0.0463438	-0.259624	-0.27168		2.10269	1.49561	1.82065		2.17331	1.93557	2.17374		-0.236249	-0.026602	1.03555	1.23011	0.874762	0.570971		YGR254W	YGR254W ... ENO1 glycolysis* phosphopyruvate hydratase activity cytoplasm* | YGR255C	-0.144051	-0.709966	-1.01546	0	0.405374
YGR255C	YGR255C ... COQ6 ubiquinone metabolism ubiquinone biosynthesis monooxygenamitochondrion* | YGR256W		yes	yes	-0.036259	-0.091426	0.030239		-0.556096	-0.339475	-0.492869	-0.247844		-0.194697	-0.0173466	-0.884549	-0.242139		0.88656	0.592289	0.593534	0.591072		0.385678	0.127076	-0.111904		0.909754	0.462583	0.139523		0.36707	0.415228	0.540571		0.17821	0.15851	0.589187	0.763442	0.608587	0.429933		YGR255C	YGR255C ... COQ6 ubiquinone metabolism ubiquinone biosynthesis monooxygenamitochondrion* | YGR256W	-1.04167	-0.76273	-0.719736	0	-0.184869
YGR278W	YGR278W ... CWC22 nuclear mRNA splicing, via spl molecular function unknown spliceosome complex | YGR279C		.	yes	-0.084134	0.227853	-0.427724		0.386571	0.511495	0.223125	-1.1105		-0.742356	-0.0384082	-1.77813	-0.605993		-0.097498	-0.47652	0.232497	0.68665		-0.284223	0.494681	0.305835		0.297376	0.848217	0.779034		0.617238	0.268978	0.15364		-0.0586817	-0.065333	0.0338834	-1.31804	0.208197	0.402684		YGR278W	YGR278W ... CWC22 nuclear mRNA splicing, via spl molecular function unknown spliceosome complex | YGR279C	-0.281081	0	0	0	-0.090304
YHR001W-A	YHR001W-A ... QCR10 aerobic respiration* ubiquinol-cytochrome-c reductase acmitochondrion* | YHR002W		.	yes	-1.58501	-1.54211	-1.34488		-1.80007	-1.65431	-1.96912	-1.62809		-0.227137	-0.241692	-0.269936	0.0721466		0.215868	0.16091	0.787465	0.346675		0.508185	0.241289	0.437218		-0.36836	0.164369	0.136509		-0.549028	-0.329704	-0.44169		0.301494	0.723921	0.52305	0.485461	1.32386	1.37972		YHR001W-A	YHR001W-A ... QCR10 aerobic respiration* ubiquinol-cytochrome-c reductase acmitochondrion* | YHR002W	-1.46515	-1.84136	-1.31074	0	-0.160875
YHR016C	YHR016C ... YSC84 endocytosis* molecular function unknown actin cortical patch | YHR017W		yes	yes	0.34588	-0.457711	-0.535515		-0.768708	-1.16889	-0.392618	-0.298217		-0.282924	-1.22283	0.254788	0.0356743		0.816772	1.0678	0.761855	0.60092		0.896074	0.982686	1.01592		0.231034	0.830804	0.875299		1.15632	0.858741	1.07098		0.602384	0.792092	0.861482	0.93292	1.35025	1.23861		YHR016C	YHR016C ... YSC84 endocytosis* molecular function unknown actin cortical patch | YHR017W	-0.462466	-0.694355	-0.229407	0	0.067552
YHR018C	YHR018C ... ARG4 arginine biosynthesis argininosuccinate lyase activity cytosol | YHR019C		.	yes	0.828077	1.16236	0.577329		-0.0119788	0.453908	0.136418	0.249271		0.0814871	0.392226	0.708989	0.05429		0.787025	0.873423	0.936789	0.769639		-0.855086	-0.493357	-0.493471		-0.894522	-0.608765	-0.892804		0.378093	0.163827	-0.0630411		0.557393	0.79262	-0.160478	-0.0461162	0.00618156	0.133087		YHR018C	YHR018C ... ARG4 arginine biosynthesis argininosuccinate lyase activity cytosol | YHR019C	0.204544	-0.171719	0.217243	0	0.446641
YHR024C	YHR024C ... MAS2 mitochondrial protein processi mitochondrial processing peptidase mitochondrial processing peptidase | YHR025W		.	yes	-0.48342	-0.633275	-0.4923		-1.06392	-0.487556	-0.695491	-0.661607		-0.264188	-0.0289479	-0.0129811	-0.115249		0.111987	-0.306138	-0.00509069	0.0513625		0.607243	0.80922	0.796677		-0.281303	0.0859336	0.0877903		0.0411455	0.0339964	0.0361646		0.746731	0.883066	-0.0232247	0.227663	0.68636	0.907248		YHR024C	YHR024C ... MAS2 mitochondrial protein processi mitochondrial processing peptidase mitochondrial processing peptidase | YHR025W	-0.764382	-0.844403	-0.511015	0	0.0772
YHR028C	YHR028C ... DAP2 protein processing dipeptidyl-peptidase and tripeptidyvacuolar membrane (sensu Fungi) | YHR028W-A		.	yes	-0.964262	-0.597768	-0.68919		-0.715596	-0.95799	-0.897331	-0.683435		-0.537738	-0.260801	-0.247612	-0.252174		0.204233	-0.0359472	0.416825	0.323059		0.974966	0.941716	0.821667		0.487195	0.213807	0.191977		0.357726	0.223583	0.515865		0.800266	0.778175	0.755877	0.453936	0.974108	1.03485		YHR028C	YHR028C ... DAP2 protein processing dipeptidyl-peptidase and tripeptidyvacuolar membrane (sensu Fungi) | YHR028W-A	-1.06109	0.625225	-1.56426	0	0.978065
YHR030C	YHR030C ... SLT2 cell wall organization and bio MAP kinase activity cytoplasm* | YHR031C		yes	yes	1.00641	0.616859	0.577645		0.19065	0.248054	0.429019	-0.397667		-0.130921	0.303698	0.127409	0.118514		0.849377	0.466897	0.6083	1.21942		0.771004	1.17371	1.16261		0.994409	1.00882	1.01892		1.12303	0.746748	0.977308		0.849351	0.860971	1.59223	2.05188	1.9248	2.02615		YHR030C	YHR030C ... SLT2 cell wall organization and bio MAP kinase activity cytoplasm* | YHR031C	-0.100063	0.088693	0.170379	0	0.945659
YHR037W	YHR037W ... PUT2 glutamate biosynthesis* 1-pyrroline-5-carboxylate dehydrogemitochondrion | YHR038W		.	yes	-0.693344	-0.682292	-0.737546		-0.523947	-0.640508	-0.685605	-1.10384		-0.186063	-0.0867712	-0.135061	-0.187239		0.116332	0.0645256	0.37518	0.795316		1.25443	1.15638	1.09642		1.15445	0.941521	0.857353		0.727347	0.623875	0.679947		0.453712	0.525545	0.155048	0.102517	0.915584	0.962269		YHR037W	YHR037W ... PUT2 glutamate biosynthesis* 1-pyrroline-5-carboxylate dehydrogemitochondrion | YHR038W	-0.720128	-0.777048	-0.51502	0	0.209899
YHR087W	YHR087W Ö iESR cluster RTC3 RNA metabolism molecular function unknown | Protein of unknown function involved in RNA metabolism; has structural similarity to SBDS, the human protein mutated in Shwachman-Diamond Syndrome (the yeast SBDS ortholog = SDO1); null mutation suppresses cdc13-1 temperature sensitivityYHR088W		yes	yes	-0.303046	-3.24779	-2.85204				-2.95521	-5.71855		-1.98336	-2.49784	-0.115161	-0.951004				4.8735	6.75274		2.04988	2.68313	0.730857		4.48437	4.13532	2.64177		4.10756	3.86364	4.44789		0.855588	1.38654	2.75679	2.94119	3.42131	3.90387		YHR087W	YHR087W Ö iESR cluster RTC3 RNA metabolism molecular function unknown | Protein of unknown function involved in RNA metabolism; has structural similarity to SBDS, the human protein mutated in Shwachman-Diamond Syndrome (the yeast SBDS ortholog = SDO1); null mutation suppresses cdc13-1 temperature sensitivityYHR088W	-1.97454	-2.66659	-1.38236	0	-1.64278
YHR097C	YHR097C iESR cluster YHR097C biological process unknown molecular function unknown cytoplasm* | YHR098C		yes	yes	0.040909	-0.444402	0.448792		-0.57433	-0.203103	-0.440639	-0.653126		-1.2464	-0.231053	-0.659482	-1.35124		1.00942	1.10844	0.91823	1.04784		1.51936	1.37827	1.08615		0.520901	0.452173	0.49881		0.744994	0.934509	1.36137		0.697824	1.09749	1.75306	2.04007	2.20424	2.31401		YHR097C	YHR097C iESR cluster YHR097C biological process unknown molecular function unknown cytoplasm* | YHR098C	-0.715077	-0.726915	-0.742033	0	-0.113595
YHR104W	YHR104W iESR cluster GRE3 response to stress* aldo-keto reductase activity* cytoplasm* | YHR105W		yes	yes	0.080787	0.176596	0.276596		-0.427921	-0.417175	-0.169337	-0.254082		-0.530852	-0.980305	-0.272703	-0.26666		0.637448	0.681583	0.557699	0.651026		1.55411	1.49695	1.16992		0.792497	0.641369	0.893747		1.38656	1.02431	1.33715		0.867318	0.931276	1.83075	1.18446	1.84462	1.62941		YHR104W	YHR104W iESR cluster GRE3 response to stress* aldo-keto reductase activity* cytoplasm* | YHR105W	-0.384149	-0.427279	-0.362107	0	0.145339
YHR112C	YHR112C iESR cluster YHR112C sulfur metabolism cystathionine beta-lyase activity cytoplasm | YHR113W		yes	yes	0.767343	0.528834	0.700302		-1.63942	-0.846959	-0.420876	0.0888058		-0.697962	0.224626	0.196783	0.315782		2.07981	1.99741	1.29292	1.67154		1.47134	1.49352	1.11254		1.22134	0.488839	0.434483		1.23299	1.1264	1.58026		0.933583	1.01629	1.27461	1.30376	1.43316	1.48227		YHR112C	YHR112C iESR cluster YHR112C sulfur metabolism cystathionine beta-lyase activity cytoplasm | YHR113W	0	0	-0.852397	0	0.718536
YHR113W	YHR113W ... YHR113W proteolysis and peptidolysis metalloendopeptidase activity* cytoplasm* | YHR114W		.	yes	-0.242951	-0.374608	0.005584		-0.0303943	0.189567	0.05528	-0.21713		0.00535603	0.140298	0.0156251	-0.0246422		0.182482	-0.207059	-0.0702239	0.225442		0.94368	1.00833	1.10628		0.267144	0.234449	0.290005		0.176044	0.140791	0.346246		0.603524	0.751776	0.899028	0.543832	1.04412	1.1271		YHR113W	YHR113W ... YHR113W proteolysis and peptidolysis metalloendopeptidase activity* cytoplasm* | YHR114W	-0.594166	-0.20919	-0.13109	0	-0.194272
YHR138C	YHR138C iESR cluster YHR138C vacuole fusion, non-autophagic endopeptidase inhibitor activity cellular component unknown | YHR139C		yes	yes	0.478455	0.909615	1.01279		-0.961353	0.890007	1.93231	0.541318		-0.282924	1.54655	1.14787	0.193386		2.33135	3.65276	1.36685	1.96349		1.03307	1.44137	1.45784		0.274921	1.39328	1.25011		2.03386	1.85036	1.84963		1.24321	1.40888	2.57993	2.3015	2.50335	2.60817		YHR138C	YHR138C iESR cluster YHR138C vacuole fusion, non-autophagic endopeptidase inhibitor activity cellular component unknown | YHR139C	0	-2.05389	-0.120414	0	-0.785865
YHR198C	YHR198C Ö AIM18 biological process unknown molecular function unknown mitochondrion | Putative protein of unknown function; the authentic, non-tagged protein is detected in highly purified mitochondria in high-throughput studies; null mutant displays elevated frequency of mitochondrial genome lossYHR199C		.	yes	-0.694237	-0.606359	-0.282845		-0.986888	-1.75045	-1.18968	-1.41815		-0.177215	-0.21174	-0.530199	-0.293675		-0.154082	0.632415	0.242676	0.483116		0.308327	0.775244	0.60088		0.255556	0.00712716	0.00082943		0.104114	-0.0302012	-0.0808252		0.479588	0.560928	0.440908	-0.263687	1.2891	1.15664		YHR198C	YHR198C Ö AIM18 biological process unknown molecular function unknown mitochondrion | Putative protein of unknown function; the authentic, non-tagged protein is detected in highly purified mitochondria in high-throughput studies; null mutant displays elevated frequency of mitochondrial genome lossYHR199C	-1.53419	-1.57606	-1.36047	0	-0.38116
YHR209W	YHR209W Ö CRG1 biological process unknown S-adenosylmethionine-dependent | Putative S-adenosylmethionine-dependent methyltransferase; mediates cantharidin resistanceYHR210C		yes	yes	2.35231	2.10781	1.95943		-1.07683	-1.10999	-1.37025	-0.911194		1.23903	1.37663	1.05476	1.54285		3.09688	4.0678	3.62269	3.56317		0.821387	0.83205	0.506704		2.35052	2.41749	2.01357		2.42459	2.25382	2.50848		0.858124	0.942661	2.52646	2.59422	3.83939	3.85499		YHR209W	YHR209W Ö CRG1 biological process unknown S-adenosylmethionine-dependent | Putative S-adenosylmethionine-dependent methyltransferase; mediates cantharidin resistanceYHR210C	0.361353	-1.10389	-0.313779	0	3.22998
YIL010W	YIL010W ... DOT5 regulation of cell redox homeo thioredoxin peroxidase activity nucleus | YIL011W		yes	yes	-0.150715	-0.3831	-0.34928		-0.618465	-0.917348	-0.304362	-1.09479		-1.13798	-1.06816	-1.6867	-0.598551		0.478902	-0.459446	-0.184662	0.665891		-0.0312361	-0.0361726	-0.280731		0.260002	0.21937	0.21759		0.972951	0.740097	0.886644		-0.386113	-0.193037	-0.0051674	-0.821255	0.48567	0.567565		YIL010W	YIL010W ... DOT5 regulation of cell redox homeo thioredoxin peroxidase activity nucleus | YIL011W	-0.565867	-0.792044	-0.666804	0	-0.250129
YIL033C	YIL033C ... BCY1 response to stress* cAMP-dependent protein kinase inhibcytoplasm* | YIL034C		.	yes	0.019902	-0.197469	-0.053795		-0.556369	-0.083841	-0.372298	-0.514269		-0.63409	-0.196288	-0.236791	-0.31704		0.341399	0.0861948	0.116868	0.464257		0.137408	0.181942	-0.0452352		0.794296	0.388532	0.472478		0.612776	0.432954	0.839129		0.0337823	-0.0470656	0.193787	0.171402	0.718922	0.639039		YIL033C	YIL033C ... BCY1 response to stress* cAMP-dependent protein kinase inhibcytoplasm* | YIL034C	-0.210552	-0.346877	-0.467646	0	0.200518
YIL034C	YIL034C ... CAP2 barbed-end actin filament capp actin filament binding actin cortical patch* | YIL035C		.	yes	-0.313948	-0.159232	-0.1516		-0.795675	-0.57394	-0.676719	-0.70281		-0.441445	-0.121932	-0.614922	-0.236231		0.529424	0.247955	0.201171	0.385684		-0.0726324	-0.143925	0.0894688		-0.247429	0.248871	0.19412		0.507901	0.525318	0.381571		-0.287841	-0.395465	-0.138448	0.0639631	0.335054	0.271966		YIL034C	YIL034C ... CAP2 barbed-end actin filament capp actin filament binding actin cortical patch* | YIL035C	-0.347085	-0.26184	0.014692	0	-0.077732
YIL070C	YIL070C ... MAM33 aerobic respiration molecular function unknown mitochondrial matrix | YIL071C		.	yes	-1.58608	-1.28966	-1.20431		-1.7882	-1.77879	-1.67088	-1.65568		-1.25417	-1.18525	-0.580284	-0.486615		-0.097498	0.0194377	-0.083742	0.13626		-0.19095	-0.578022	-0.557457		0.27263	0.0390433	-0.0537811		0.126001	0.185423	-0.0960263		-0.616677	-0.855121	-1.22325	-2.16047	-0.0639399	-0.394366		YIL070C	YIL070C ... MAM33 aerobic respiration molecular function unknown mitochondrial matrix | YIL071C	-1.19129	-1.32319	-1.47544	0	0.164184
YIL076W	YIL076W ... SEC28 ER to Golgi transport* molecular function unknown COPI vesicle coat | YIL077C		yes	yes	0.138094	0.285191	0.016926		-0.648885	-0.709906	-0.0151945	-1.01724		-1.26729	-0.195378	0.00382655	-0.11367		0.233977	-0.0391145	0.399955	0.70286		-0.315621	0.0340333	-0.164966		0.674311	0.90195	0.721228		0.948403	0.997299	0.995901		-0.262295	-0.141903	0.0763686	-0.219805	0.399486	0.497301		YIL076W	YIL076W ... SEC28 ER to Golgi transport* molecular function unknown COPI vesicle coat | YIL077C	0.522096	0.608329	0.599654	0	0.956366
YIL108W	YIL108W ... YIL108W proteolysis and peptidolysis metalloendopeptidase activity cytoplasm | YIL109C		yes	yes	0.057401	0.088334	0.506735		0.340831	-0.439841	-0.233861	0.079528		0.37635	-0.0811578	0.00627664	0.222		0.788917	1.18575	1.05885	0.961272		0.126748	0.169865	0.153467		0.377644	0.706509	0.730876		0.889419	0.830814	0.852568		-0.0398227	-0.0169683	1.17958	0.842647	1.16375	1.01089		YIL108W	YIL108W ... YIL108W proteolysis and peptidolysis metalloendopeptidase activity cytoplasm | YIL109C	0.146052	0.174494	0.210241	0	0.573005
YIL109C	YIL109C ... SEC24 ER to Golgi transport* protein binding COPII vesicle coat | YIL110W		.	yes	-0.412186	0.07167	0.214479		-0.0386437	0.0491148	-0.157833	0.180558		0.570577	0.460164	0.231431	0.393379		0.64745	0.501141	0.528638	0.532381		0.128841	-0.0316392	0.0186047		-0.0368555	-0.141407	-0.0457227		0.121914	0.02042	0.178584		-0.0865198	-0.0728181	0.284328	0.466793	0.250589	0.264871		YIL109C	YIL109C ... SEC24 ER to Golgi transport* protein binding COPII vesicle coat | YIL110W	-0.420376	-0.105726	0.138536	0	-0.17461
YIL117C	YIL117C ... PRM5 conjugation with cellular fusi molecular function unknown integral to membrane | YIL118W		yes	yes	5.17916	7.26692	6.92522		1.36058	0.0381053	0.801811	0.8471		1.56507	0.2757	0.410907	0.501434		1.69648	1.71025	1.39174	1.55368		1.58444	1.05738	0.93875		2.99671	2.69976	2.933		2.13258	2.52532	2.83551		-0.225533	-0.34168	0.146674	-0.160582	1.74495	1.59417		YIL117C	YIL117C ... PRM5 conjugation with cellular fusi molecular function unknown integral to membrane | YIL118W	1.44407	1.35275	1.33821	0	2.01988
YIL124W	YIL124W iESR cluster AYR1 phosphatidic acid biosynthesis acylglycerone-phosphate reductase acytoplasm* | YIL125W		.	yes	-0.069555	-0.177129	-0.020356		-0.246755	0.017386	-0.614175	-0.424818		0.113497	0.296776	0.20034	0.313968		0.0755064	-0.245445	0.318912	0.499418		-0.0858972	0.116779	0.0290806		0.908025	0.861943	0.655761		0.865261	0.663597	0.401385		-0.462681	-0.379046	-0.625293	-0.278439	0.0699173	-0.00156074		YIL124W	YIL124W iESR cluster AYR1 phosphatidic acid biosynthesis acylglycerone-phosphate reductase acytoplasm* | YIL125W	-0.491965	-0.670073	-0.424812	0	0.128935
YIL125W	YIL125W ... KGD1 tricarboxylic acid cycle* oxoglutarate dehydrogenase (succinymitochondrial matrix* | YIL126W		.	yes	-0.872754	-0.858709	-0.664892		-0.774518	-0.682378	-0.728441	-0.807483		-0.197373	-0.0384082	-0.303428	-0.25443		0.174807	0.237726	0.0173323	0.191013		-0.0423031	0.0208107	-0.273997		0.37585	0.531889	0.414615		0.28275	0.154035	0.150188		-0.287613	-0.138926	-0.292062	-0.689785	0.142088	0.286901		YIL125W	YIL125W ... KGD1 tricarboxylic acid cycle* oxoglutarate dehydrogenase (succinymitochondrial matrix* | YIL126W	-0.63209	-0.769118	-0.776026	0	0.31258
YIL140W	YIL140W ... AXL2 bud site selection* molecular function unknown bud neck* | YIL141W		yes	yes	-0.361205	-0.137824	0.270119		-0.506787	-0.387361	-0.414174	-0.354038		0.598329	0.584451	0.54493	0.46304		0.768055	0.865217	0.826877	0.844687		0.268453	0.17157	0.219658		1.03488	0.823573	0.796259		0.62745	0.83286	0.512835		-0.139889	-0.0714701	0.577239	0.902719	1.09938	0.958497		YIL140W	YIL140W ... AXL2 bud site selection* molecular function unknown bud neck* | YIL141W	-0.578599	-0.682688	-0.668437	0	0.604196
YIL160C	YIL160C ... POT1 fatty acid beta-oxidation acetyl-CoA C-acyltransferase activiperoxisomal matrix | YIL161W		yes	yes	-0.040011		-0.566637				1.04479				-1.03841		-2.14365				3.0738			2.82749	1.29081				1.62435	0.978803		1.23685	1.11028			-0.0586817	0.450106	1.80953	3.40685	2.43059	2.3577		YIL160C	YIL160C ... POT1 fatty acid beta-oxidation acetyl-CoA C-acyltransferase activiperoxisomal matrix | YIL161W	-0.133075	-0.171592	0.071184	0	0.691399
YIL169C	YIL169C ... YIL169C biological process unknown molecular function unknown cellular component unknown | YIL171W-A		.	yes	-0.724213	-0.493096	-0.17246		-0.251824	-0.277242	-0.407802	-0.144585		0.780568	0.609582	0.662638	0.437401		0.156	0.0279033	0.232523	-0.012197		-0.0431703	0.108513	0.0763533		0.748103	0.591062	0.639533		0.0283451	-0.312813	-0.162664		0.356356	2.2367	3.5075	5.37032	2.06802	2.50525		YIL169C	YIL169C ... YIL169C biological process unknown molecular function unknown cellular component unknown | YIL171W-A	-0.701723	-0.913691	-0.475412	0	-0.162513
YIR038C	YIR038C iESR cluster GTT1 glutathione metabolism glutathione transferase activity mitochondrion* | YIR039C		yes	yes	-0.389161	-0.122257	-0.05849		-0.0816469	-0.673894	-0.357972	-0.431201		1.24314	0.365982	0.769361	0.630791		1.21378	1.32185	1.32501	1.58809		0.874793	0.134083	0.0718936		1.74741	1.24839	1.09428		1.12059	1.02754	1.34866		-0.465307	-0.350482	-0.315541	-0.658441	0.919627	0.801419		YIR038C	YIR038C iESR cluster GTT1 glutathione metabolism glutathione transferase activity mitochondrion* | YIR039C	-1.01825	-0.882069	-0.93495	0	0.59572
YJL020C	YJL020C ... BBC1 actin cytoskeleton organizatio myosin I binding actin cortical patch | YJL022W		.	yes	-1.06472	-0.561179	-0.645989		-0.565424	-0.155081	-0.457397	-0.0753641		-0.270324	-0.190411	-0.580284	-0.385039		0.198451	-0.0163944	0.0515804	-0.31335		-0.0593457	-0.0213105	-0.124408		0.6117	0.272916	0.330863		0.587289	0.484054	0.514898		-0.117164	-0.141284	0.747338	1.05673	0.290976	0.15353		YJL020C	YJL020C ... BBC1 actin cytoskeleton organizatio myosin I binding actin cortical patch | YJL022W	-0.263234	-0.366488	-0.4454	0	0.309677
YJL034W	YJL034W ... KAR2 SRP-dependent cotranslational ATPase activity* endoplasmic reticulum lumen | YJL035C		yes	yes	-0.441003	-0.485219	-0.190203		-0.244368	-0.279421	-0.257288	-0.229983		-0.0313205	-0.0885799	-0.209281	-0.120492		1.14575	1.03432	0.871416	0.953598		0.413911	0.449908	0.460474		0.433761	0.327413	0.42658		0.723533	0.609693	0.742375		0.252726	0.285864	2.47197	2.44933	0.0395483	0.150713		YJL034W	YJL034W ... KAR2 SRP-dependent cotranslational ATPase activity* endoplasmic reticulum lumen | YJL035C	-0.237696	-0.086358	-0.327299	0	0.296274
YJL036W	YJL036W ... SNX4 transport* lipid binding membrane | YJL037W		yes	yes	0.275676	-0.060269	-0.1516		-0.73896	-0.0275311	0.552935	-0.64816		-1.86789	-0.318516	0.56291	-0.802612		1.06004	0.338448	0.113328	0.673229		0.0324895	0.233665	0.0361194		-0.376712	1.00824	0.942643		0.643246	0.908865	1.00164		-0.250108	-0.147795	1.35663	0.921424	0.321264	0.348153		YJL036W	YJL036W ... SNX4 transport* lipid binding membrane | YJL037W	-0.045544	0.088316	-0.158722	0	0.268608
YJL060W	YJL060W ... BNA3 NAD biosynthesis arylformamidase activity cytoplasm* | YJL061W		yes	yes	-0.425133	-0.452802	-0.16713		-0.858991	-0.655734	-1.01868	-0.392409		0.454041	0.496469	0.129494	0.345389		0.702236	0.806187	0.922832	0.508235		-0.177584	-0.261311	-0.0235435		-0.211012	0.260698	0.27185		0.401797	0.340471	0.151446		-0.375257	-0.233829	0.852156	0.395553	0.0197169	0.196488		YJL060W	YJL060W ... BNA3 NAD biosynthesis arylformamidase activity cytoplasm* | YJL061W	-0.503409	-0.373561	-0.3644	0	0.756151
YJL066C	YJL066C iESR cluster MPM1 biological process unknown molecular function unknown mitochondrion* | YJL067W		yes	yes	0.043404	-0.359105	-0.25966		-0.661792	-1.47256	-0.589084	-0.430568		-1.2464	-1.03841	-0.43709	-0.569914		1.17934	1.54055	0.438211	0.845848		-0.0205097	0.384785	-0.536624		1.89941	0.914869	1.16101		0.985308	0.768723	1.71435		-0.228607	-0.142929	0.980641	0.991813	0.561059	0.701651		YJL066C	YJL066C iESR cluster MPM1 biological process unknown molecular function unknown mitochondrion* | YJL067W	-0.480275	-0.473632	-0.543558	0	0.582961
YJL073W	YJL073W ... JEM1 protein folding* unfolded protein binding* endoplasmic reticulum* | YJL074C		yes	yes	0.008083	0.339561	-0.096458		0.12611	0.047548	0.554982	-0.0887323		-1.13092	0.119133	-0.574593	0.027962		-0.0482983	0.794782	0.568454	0.886789		0.249545	0.196234	0.470077		-0.0796281	0.0202236	0.209233		0.775313	0.556644	0.769555		0.234325	0.249344	1.87484	1.52802	0.152054	0.347265		YJL073W	YJL073W ... JEM1 protein folding* unfolded protein binding* endoplasmic reticulum* | YJL074C	-0.472356	-0.239769	0.331	0	0.26503
YJL082W	YJL082W ... IML2 biological process unknown molecular function unknown cytoplasm* | YJL083W		yes	yes	-0.154913	-0.244324	0.108789		0.0386473	0.127046	-0.127165	0.162806		0.377226	-0.597836	-0.0990418	0.0841565		0.363054	0.170248	0.34156	0.398144		-0.262196	-0.46841	-0.310196		0.624618	0.79624	0.959085		1.09904	1.0351	1.17246		-0.485656	-0.327123	1.1092	0.855897	0.732714	0.738946		YJL082W	YJL082W ... IML2 biological process unknown molecular function unknown cytoplasm* | YJL083W	-0.203512	0.011747	0.27032	0	0.152459
YJL102W	YJL102W ... MEF2 translational elongation translation elongation factor activmitochondrion | YJL103C		.	yes	-1.24922	-1.70722	-1.53011		-1.39431	-1.87553	-1.70176	-2.12801		-0.265222	-0.284569	-0.446676	-0.6274		-0.0645834	0.353555	0.244911	0.543285		0.0374103	0.192961	-0.108207		0.7723	1.06518	0.69228		0.627637	0.830443	0.643183		0.077953	0.264094	1.21498	0.774583	0.146381	0.10394		YJL102W	YJL102W ... MEF2 translational elongation translation elongation factor activmitochondrion | YJL103C	-1.64825	-2.00397	-1.78791	0	0.768305
YJL107C	YJL107C ... YJL107C biological process unknown molecular function unknown cellular component unknown | YJL108C		yes	yes	-0.06238	-0.238859	0.013823		-0.639425	-0.505922	-0.770373	-0.606801		-0.15168	0.224626	-0.479215	-0.0140898		1.00942	1.12104	1.36164	1.33801		0.15207	0.250167	-0.151539		0.100006	-0.0949101	0.461404		0.527896	0.0684598	0.777422		-0.00805564	0.20713	1.78178	1.28656	0.877475	0.839949		YJL107C	YJL107C ... YJL107C biological process unknown molecular function unknown cellular component unknown | YJL108C	-1.2327	-1.54741	-1.00534	0	0.430027
YJL151C	YJL151C ... SNA3 biological process unknown molecular function unknown membrane* | YJL152W		.	yes	0.071192	-0.517633	0.178248		-0.176092	-0.177108	-0.227066	-0.200701		-0.213022	-0.567102	-0.0718577	-0.307625		0.25453	0.554629	0.276062	0.266746		0.0884911	-0.0342475	-0.276198		0.0981319	0.105693	-0.0749681		0.0130994	0.0790781	0.123627		-0.127723	-0.343156	1.28184	1.49313	-0.0461747	-0.200814		YJL151C	YJL151C ... SNA3 biological process unknown molecular function unknown membrane* | YJL152W	0.378611	-0.02078	0.141672	0	0.247785
YJL153C	YJL153C ... INO1 myo-inositol metabolism inositol-3-phosphate synthase activcytoplasm | YJL154C		yes	yes	0.63806	1.00632	0.808872		1.13818	1.02751	0.781753	0.905942		0.646686	1.44702		-0.288039		2.27245	2.60837	2.27543	2.41971		-0.0112319	-0.609656	-0.0534146		1.75257	0.83492	1.5792		3.03466	2.37331	1.88916		0.737785	0.125267	4.35861	3.8956	1.57498	1.06938		YJL153C	YJL153C ... INO1 myo-inositol metabolism inositol-3-phosphate synthase activcytoplasm | YJL154C	0	0	0	0	0
YJL154C	YJL154C ... VPS35 protein-Golgi retention* molecular function unknown endosome* | YJL155C		.	yes	0.307096	0.186153	0.060524		0.258325	0.280241	0.242536	-0.0784128		-0.501105	-0.424591	-0.60655	-0.484274		0.126774	-0.151815	-0.0482972	0.33841		0.116307	0.234955	0.0929011		0.691217	0.683393	0.447996		0.784132	0.740097	0.873427		-0.0619347	-0.00848744	0.985507	0.909036	-0.0284364	0.145171		YJL154C	YJL154C ... VPS35 protein-Golgi retention* molecular function unknown endosome* | YJL155C	-0.220198	0.010855	0.10639	0	0.040835
YJL155C	YJL155C iESR cluster FBP26 glucose metabolism "fructose-2,6-bisphosphate 2-phospha"cytosol | YJL156C		yes	yes	0.671075	0.748025	0.335449		-0.823849	0.131015	0.142085	-0.64816		-1.18981	-0.327915	-0.956464	-0.281153		1.07355	0.260446	0.488837	1.13411		0.289067	-0.0791409	-0.228501		1.42811	1.59661	1.62266		1.33852	1.45947	1.84294		-0.0363139	-0.0373396	1.3289	1.6393	1.12175	1.32075		YJL155C	YJL155C iESR cluster FBP26 glucose metabolism "fructose-2,6-bisphosphate 2-phospha"cytosol | YJL156C	-0.864725	-0.221841	-0.791074	0	0.597474
YJL171C	YJL171C ... YJL171C biological process unknown molecular function unknown mitochondrion* | YJL172W		yes	yes	0.534098	0.441298	0.788015		-0.156857	0.0778868	-0.0919357	0.128883		0.574038	0.69023	0.8601	0.661446		1.21914	1.34594	1.27473	1.20303		0.291224	0.136115	0.237708		1.09522	0.869916	0.946146		0.477291	0.415835	0.556094		-0.230203	-0.131605	1.77943	2.10227	0.818419	0.885554		YJL171C	YJL171C ... YJL171C biological process unknown molecular function unknown mitochondrion* | YJL172W	0.050151	-0.073713	-0.14797	0	0.656817
YJL172W	YJL172W ... CPS1 proteolysis and peptidolysis* Gly-X carboxypeptidase activity vacuole (sensu Fungi) | YJL173C		.	yes	-0.519207	-0.42483	-0.164348		-0.498474	-0.323808	-0.714862	-0.415169		0.265729	0.372106	-0.0713891	0.162933		0.351179	0.400124	0.638523	0.564115		0.118907	0.117821	0.0530203		0.309175	0.143377	0.21209		-0.034356	-0.154232	-0.0619155		-0.43035	-0.260764	1.12628	1.22415	0.0564008	0.125805		YJL172W	YJL172W ... CPS1 proteolysis and peptidolysis* Gly-X carboxypeptidase activity vacuole (sensu Fungi) | YJL173C	-0.266478	-0.170449	-0.398022	0	0.460549
YJL180C	YJL180C ... ATP12 protein complex assembly unfolded protein binding mitochondrial matrix | YJL181W		.	yes	-0.49569	-0.516417	-0.940095		-1.0525	-0.862066	-1.66981	-1.83884		-1.09028	-0.0384082	-1.5302	-0.606176		-0.426682	-0.0805911	0.290897	0.638821		-0.301796	-0.262935	-0.489431		-0.229871	0.218902	0.264475		0.374351	0.268095	0.352711		-0.626965	-0.573244	-0.0641942	-0.454443	-0.0570762	0.174475		YJL180C	YJL180C ... ATP12 protein complex assembly unfolded protein binding mitochondrial matrix | YJL181W	-1.0693	-1.09752	-0.86703	0	0.419442
YJR008W	YJR008W iESR cluster YJR008W biological process unknown molecular function unknown cytoplasm* | YJR009C		yes	yes	0.51253	-0.295317	-0.1516		-0.546315	-0.109993	-1.1776	-0.036725		-1.45285	-1.03841	0.662446	-0.0281722		1.70986	1.43037	1.64084	1.58477		0.0498796	-0.00875161	-0.508609		0.899412	1.82599	0.978803		1.69253	1.89527	1.87611		-0.12427	0.00592258	1.29343	1.66989	1.3872	1.6964		YJR008W	YJR008W iESR cluster YJR008W biological process unknown molecular function unknown cytoplasm* | YJR009C	-0.885373	0	0	0	0.680315
YJR010W	YJR010W ... MET3 methionine metabolism* sulfate adenylyltransferase (ATP) acytoplasm* | YJR011C		yes	yes	0.298157	0.652216	0.089408		-0.50884	0.807545	-0.627638	-0.112828		-0.415375	1.31523	0.119304	0.19077		1.73524	0.260446	1.11333	1.05122		-0.43304	-0.494178	-0.62278		0.754362	0.789691	0.177707		1.27638	1.14102	0.795186		-0.709571	-0.565324	0.641267	1.08108	-0.644798	-0.405479		YJR010W	YJR010W ... MET3 methionine metabolism* sulfate adenylyltransferase (ATP) acytoplasm* | YJR011C	-0.399255	-1.02271	-0.492309	0	-0.165839
YJR015W	YJR015W ... YJR015W biological process unknown molecular function unknown cytoplasm* | YJR016C		yes	yes	-0.695709	-0.680501	-0.437631		-0.902725	-0.878919	-1.26735	-1.02301		0.442024	0.503007	0.712104	0.266489		0.875739	0.952873	1.32933	1.02225		0.173103	0.379814	-0.136365		0.928171	0.573634	0.269253		0.444652	0.244417	0.279739		0.132629	0.211891	0.942119	1.21027	0.0291258	0.068672		YJR015W	YJR015W ... YJR015W biological process unknown molecular function unknown cytoplasm* | YJR016C	-0.517816	-0.680293	-0.94796	0	1.59911
YJR019C	YJR019C ... TES1 fatty acid oxidation acyl-CoA thioesterase activity mitochondrion* | YJR020W		.	yes	-0.776977	-0.309189	-0.269437		-0.961353	-0.898489	-0.837855	-0.399132		0.295612	-0.227442	0.587158	0.359589		1.00942	0.303514	0.604314	0.448039		-0.129444	1.15039	0.264539		0.439981	0.815835	-0.140496		0.634811	-0.231013	-0.545851		0.184175	0.106152	1.83495	1.75477	0.949963	0.394222		YJR019C	YJR019C ... TES1 fatty acid oxidation acyl-CoA thioesterase activity mitochondrion* | YJR020W	-0.924587	-0.573342	-1.01733	0	-0.205123
YJR047C	YJR047C ... ANB1 translational initiation translation initiation factor activribosome | YJR048W		.	yes	0.375026	1.32712	1.22691		1.62361	1.21193	4.56835	3.17627		0.132113	-1.03841	3.4698	0.856351		0.424455	-1.06148	-0.160256	-0.700374		0.701956	0.768856	2.45332			1.08003	2.88569		1.70341	0.994803	1.4964		-0.348188	1.03507	-0.556793	1.57678	0.430589	1.70165		YJR047C	YJR047C ... ANB1 translational initiation translation initiation factor activribosome | YJR048W	-1.55472	-0.77741	0.226004	0	-1.6524
YJR077C	YJR077C ... MIR1 phosphate transport inorganic phosphate transporter actmitochondrion* | YJR078W		.	yes	-0.980084	-0.95254	-0.293644		-1.33568	-1.08594	-1.42914	-0.982474		0.330346	0.540767	0.34867	0.453139		0.423219	0.52348	0.4586	0.163394		-0.0390671	-0.124229	-0.0889435		0.458958	0.201268	0.100182		-0.27125	-0.291191	-0.415318		-0.209273	-0.238417	0.496752	0.406049	0.251099	0.0228941		YJR077C	YJR077C ... MIR1 phosphate transport inorganic phosphate transporter actmitochondrion* | YJR078W	-1.02398	-0.917935	-0.82653	0	0.084154
YJR080C	YJR080C Ö AIM24 biological process unknown molecular function unknown mitochondrion | Protein of unknown function; the authentic, non-tagged protein is detected in purified mitochondria in high-throughput studies; null mutant displays reduced respiratory growth and elevated frequency of mitochondrial genome lossYJR082C		.	yes	-0.460174	-0.821676	-0.810801		-1.87389	-1.39379	-0.827662	-1.45926		-0.475569	-0.523835	-0.617662	-0.670017		0.876151	-0.175653	0.071331	0.51262		-0.00485644	-0.0411731	0.137255		0.439981	0.511012	0.599214		0.425335	0.32892	0.251615		0.0291616	-0.0755751	0.925106	1.23208	0.625927	0.498784		YJR080C	YJR080C Ö AIM24 biological process unknown molecular function unknown mitochondrion | Protein of unknown function; the authentic, non-tagged protein is detected in purified mitochondria in high-throughput studies; null mutant displays reduced respiratory growth and elevated frequency of mitochondrial genome lossYJR082C	-0.528812	-0.663918	-0.86807	0	0.411845
YJR084W	YJR084W ... CSN12 adaptation to pheromone during molecular function unknown signalosome complex | YJR085C		.	yes	0.214454	-0.088865	0.122393		0.989738	0.533863	-0.057092	-0.364912		-0.0743377	-0.0384082	-0.989631	-0.190192		-0.848564	-1.06148	-0.0961258	0.0699782		-0.308885	-0.04828	0.151432		0.297376	0.596798	0.421321		0.825122	0.297366	0.143656		0.155443	-0.217473	0.986703	0.353213	0.246165	0.0867015		YJR084W	YJR084W ... CSN12 adaptation to pheromone during molecular function unknown signalosome complex | YJR085C	0	0	1.03826	0	0.422282
YJR096W	YJR096W iESR cluster YJR096W arabinose catabolism* aldo-keto reductase activity* cytoplasm* | YJR097W		yes	yes	0.437567	0.418969	0.556635		-0.333321	-0.694956	-0.00251807	-0.911194		-1.15739	-0.163939	0.100567	-0.433156		0.506917	1.65276	0.903874	1.70295		-0.172513	0.428312	-0.235591		0.31445	0.302425	0.248892		1.40796	0.373314	1.37247		-0.179536	-0.268123	1.23994	1.37828	0.489483	0.621456		YJR096W	YJR096W iESR cluster YJR096W arabinose catabolism* aldo-keto reductase activity* cytoplasm* | YJR097W	-0.851059	-1.3292	-1.07132	0	0.229942
YJR101W	YJR101W ... RSM26 protein biosynthesis structural constituent of ribosome mitochondrial small ribosomal subun | YJR102C		.	yes	-0.630226	-0.812899	-0.825944		-1.00088	-1.23198	-0.413202	-1.34449		-0.702301	-0.309262	0.258904	-0.282855		-0.0519833	0.0142852	-0.30014	0.212208		-0.125946	-0.0614931	-0.449517		0.729487	0.504059	0.269661		0.232109	0.0958838	0.373912		-0.601696	-0.527386	-0.115395	-0.736107	-0.101586	-0.116468		YJR101W	YJR101W ... RSM26 protein biosynthesis structural constituent of ribosome mitochondrial small ribosomal subun | YJR102C	-0.7816	-0.707391	-0.935876	0	0.592961
YJR121W	YJR121W ... ATP2 ATP synthesis coupled proton t hydrogen-transporting ATP synthase soluble fraction* | YJR122W		.	yes	-1.41305	-1.212	-0.650087		-1.34782	-1.22701	-1.46783	-1.24033		0.494809	0.744113	0.601479	0.661717		0.400793	0.738616	0.508804	0.531908		-0.141228	-0.0718797	-0.224211		0.50484	0.390136	0.217172		-0.220235	-0.180899	-0.182918		-0.268628	-0.174204	0.480441	0.555499	0.270792	0.208309		YJR121W	YJR121W ... ATP2 ATP synthesis coupled proton t hydrogen-transporting ATP synthase soluble fraction* | YJR122W	-1.01844	-1.09678	-1.22756	0	0.209401
YKL001C	YKL001C ... MET14 methionine metabolism* adenylyl-sulfate kinase activity cytoplasm* | YKL002W		yes	yes	0.653562	0.939564	0.748095		-0.131278	-0.846959	0.12279	-0.348599		-0.715884	-1.03841	-0.700124	-0.581055		1.05381	0.582374	0.179509	0.829608		-0.199994	-0.513641	-0.689252		-0.828508	-0.128209	-0.210231		0.858335	0.581119	0.620074		-0.359851	-0.345074	-0.569261	-0.668437	-0.811687	-0.538886		YKL001C	YKL001C ... MET14 methionine metabolism* adenylyl-sulfate kinase activity cytoplasm* | YKL002W	-0.283073	0.632545	0.101576	0	0.872975
YKL023W	YKL023W ... YKL023W biological process unknown molecular function unknown cytoplasm | YKL024C		.	yes	0.019695	-0.466428	-0.235992		-0.250859	0.00548391	-0.0223266	-1.28316		-0.742356	-1.03841		-1.43316		0.0094172	-0.439994	0.0965193	0.406542		-0.225254	0.527848	0.136849		-0.122956	0.664995	-0.0825974		0.33761	0.433257	0.131697		0.28012	0.698034	1.10058	-0.00818673	0.735444	0.242219		YKL023W	YKL023W ... YKL023W biological process unknown molecular function unknown cytoplasm | YKL024C	-1.14963	-1.17321	-0.612025	0	-0.785701
YKL062W	YKL062W ... MSN4 response to stress* DNA binding* cytoplasm* | YKL063C		yes	yes	-0.15347	-0.244036	0.052415		-1.71624	0.590446	-1.51321	-1.3486		-0.0378118	1.60545	0.0638087	0.373142		1.33135	0.560006	1.64084	1.03242		0.640284	0.941063	0.962864		2.17006	1.95905	2.21212		1.04767	0.756076	1.22627		0.0553901	0.290817	0.444348	0.446281	1.24402	1.37741		YKL062W	YKL062W ... MSN4 response to stress* DNA binding* cytoplasm* | YKL063C	-0.610409	-1.41733	-2.42828	0	0.944455
YKL065C	YKL065C iESR cluster YET1 biological process unknown molecular function unknown endoplasmic reticulum | YKL066W		yes	yes	0.15363	0.38071	0.304438		-0.667621	-0.854154	0.480887	-0.389048		-1.12164	-0.519535	0.315224	-0.127469		1.00942	1.00461	0.494528	1.08936		0.180862	0.0132747	0.127158		0.390863	1.10151	1.28827		1.09252	1.05412	1.30649		-0.210228	-0.123556	0.998058	0.391118	0.931396	0.842745		YKL065C	YKL065C iESR cluster YET1 biological process unknown molecular function unknown endoplasmic reticulum | YKL066W	0.044113	0.154196	0.071732	0	0.721986
YKL069W	YKL069W ... YKL069W biological process unknown molecular function unknown cytoplasm* | YKL070W		.	yes	-0.337848	-0.346352	-0.370609		-0.295772	-1.47923	-0.285361	-0.896695		-0.818977	-0.533173	-0.667703	-0.249444		-0.514145	0.582374	-0.392519	0.271612		-0.532769	0.0891748	-0.0776621		0.593604	0.451289	1.03583		0.969367	0.138849	0.887178		-0.441151	-0.357846	-0.732597	-0.924663	0.0481195	0.101846		YKL069W	YKL069W ... YKL069W biological process unknown molecular function unknown cytoplasm* | YKL070W	-0.354464	-0.989576	-0.080924	0	0.353696
YKL073W	YKL073W ... LHS1 response to unfolded protein* unfolded protein binding endoplasmic reticulum lumen | YKL074C		yes	yes	-0.583235	-0.449709	-0.271291		-0.318905	-0.310526	-0.151533	-0.687981		-1.05551	-0.0831465	-0.625023	-0.421706		0.674753	0.546497	0.542505	1.00365		0.237642	0.339172	0.298459		-0.573076	0.039987	0.127391		0.349387	0.250532	0.50986		0.381791	0.146817	0.853336	0.441023	0.0292146	0.0230506		YKL073W	YKL073W ... LHS1 response to unfolded protein* unfolded protein binding endoplasmic reticulum lumen | YKL074C	-0.095073	-0.178812	-0.211346	0	0.425887
YKL091C	YKL091C iESR cluster YKL091C biological process unknown molecular function unknown nucleus | YKL092C		yes	yes	-0.409245	-1.46213	-0.298441		-0.183745	-0.261996	-0.607289	-0.747695		0.132113	-0.552981	0.0103694	-0.295652		-0.76819	-0.102124	0.555951	0.338726		-0.108948	0.479843	-0.220234		0.689959	1.07642	1.14319		1.18622	0.627887	1.50753		-0.776911	-0.190999	-0.540968	-1.45665	0.780532	0.716591		YKL091C	YKL091C iESR cluster YKL091C biological process unknown molecular function unknown nucleus | YKL092C	-0.818223	-0.429484	-0.677072	0	0.414492
YKL096W	YKL096W ... CWP1 cell wall organization and bio structural constituent of cell wallcell wall (sensu Fungi) | YKL096W-A		yes	yes	1.08847	0.894487	1.52603		-1.80445	-1.87244	-2.12156	-1.64287		1.36901	1.25321	1.37064	1.37391		2.60444	2.7194	3.03675	2.76426		-0.180687	-0.559789	-0.375343		2.82412	2.30967	2.36236		2.54428	2.50618	2.34253		-0.661666	-0.568601	0.026831	0.0275352	1.48473	1.41259		YKL096W	YKL096W ... CWP1 cell wall organization and bio structural constituent of cell wallcell wall (sensu Fungi) | YKL096W-A	-0.460461	-0.679074	-1.0801	0	2.11837
YKL104C	YKL104C ... GFA1 cell wall chitin biosynthesis glutamine-fructose-6-phosphate trancellular component unknown | YKL105C		yes	yes	0.319061	0.418125	0.535795		0.118127	0.0605505	-0.0172466	0.139465		0.386611	0.454559	0.418712	0.386498		1.33183	1.32576	1.17085	1.3873		0.319536	0.188523	-3.01e-05		1.093	1.03215	0.987912		1.27282	1.15022	1.53514		0.0465818	-0.0507357	0.799984	0.791826	1.04749	1.04931		YKL104C	YKL104C ... GFA1 cell wall chitin biosynthesis glutamine-fructose-6-phosphate trancellular component unknown | YKL105C	0.087726	0.174335	0.193305	0	1.05645
YKL126W	YKL126W ... YPK1 protein amino acid phosphoryla protein serine/threonine kinase actcytosol* | YKL127W		yes	yes	-0.231236	-0.206074	-0.046113		-0.287497	-0.467545	-0.0991218	-0.513707		-0.507189	0.0369992	-0.0266248	-0.119231		0.406753	0.477676	0.189018	0.688207		0.193932	0.160179	0.161138		0.725807	0.63508	0.609022		0.601992	0.545333	0.751026		-0.0350751	-0.0640701	0.197959	-0.0518867	0.499699	0.51241		YKL126W	YKL126W ... YPK1 protein amino acid phosphoryla protein serine/threonine kinase actcytosol* | YKL127W	-0.360003	-0.326934	-0.333488	0	0.136606
YKL129C	YKL129C ... MYO3 cell wall organization and bio microfilament motor activity actin cortical patch | YKL130C		yes	yes	-0.076692	-0.171904	0.077306		-0.4394	0.105735	-0.309643	-0.618641		-0.295308	-0.0857139	0.271021	-0.569914		1.17934	0.762946	0.819262	0.91425		0.254908	0.505299	0.0767481		0.899412	1.1645	1.16522		0.969367	0.613619	1.02493		0.199423	-0.124033	0.292141	-0.383226	0.551895	0.282217		YKL129C	YKL129C ... MYO3 cell wall organization and bio microfilament motor activity actin cortical patch | YKL130C	-0.045986	-0.070985	0.110808	0	0.198648
YKL142W	YKL142W iESR cluster MRP8 protein biosynthesis structural constituent of ribosome mitochondrial ribosome | YKL143W		yes	yes	0.250174	0.010009	-0.357504		-0.323923	-1.37303	0.0447876	-1.11765		-0.867887	-0.350352	0.391798	0.139285		0.59438	0.52348	0.424131	1.33494		0.194026	0.2206	0.250231		1.06801	1.04443	1.11266		1.4497	1.19627	1.41667		-0.219707	-0.138782	0.285174	-0.178112	1.06188	0.824857		YKL142W	YKL142W iESR cluster MRP8 protein biosynthesis structural constituent of ribosome mitochondrial ribosome | YKL143W	-0.204494	-0.368288	-0.445114	0	0.345436
YKL151C	YKL151C iESR cluster YKL151C biological process unknown molecular function unknown cytoplasm | YKL152C		yes	yes	-0.20351	-0.260425	-0.220313		-1.08688	-0.247497	-0.427281	-0.795717		-1.28292	0.894478	-1.95646	-0.0561866		1.35734	1.39795	1.21646	1.7411		0.727952	0.226268	-0.0801095		1.16245	0.957777	1.41176		1.18438	1.34475	1.96316		-0.104485	0.459822	0.546495	-0.21764	0.867994	1.24222		YKL151C	YKL151C iESR cluster YKL151C biological process unknown molecular function unknown cytoplasm | YKL152C	-0.808495	-0.768012	-0.873582	0	0.126952
YKL159C	YKL159C ... RCN1 calcium-mediated signaling calcium-dependent protein serine/thcalcineurin complex | YKL160W		.	yes	-0.07954	-0.618431	-0.003502		0.453685	-1.69496	-0.317782	0.27323		-0.867887	-0.301443	-0.285086	-0.69619		0.331345	1.58237	0.555951	0.290721		0.727952	0.513201	0.508464		0.255556	0.454429	0.756411		0.592991	0.462124	0.171562		0.142952	-0.0827676	0.750636	1.12674	1.06286	0.891722		YKL159C	YKL159C ... RCN1 calcium-mediated signaling calcium-dependent protein serine/thcalcineurin complex | YKL160W	0.102962	-0.133634	-0.366681	0	0.256008
YKL161C	YKL161C ... YKL161C biological process unknown protein kinase activity cellular component unknown | YKL162C		yes	yes	2.27388	2.24966	2.18048		-0.80935	-1.43192	-0.218247	-1.51606		1.71708	2.35848	2.5478	1.8711		3.98211	3.86531	3.5857	4.22063		0.153715	-0.489878	0.0599803		2.74021	2.85197	3.06095		3.14953	3.33821	3.12784		0.136869	-0.141809	1.14156	0.919405	1.42021	1.15381		YKL161C	YKL161C ... YKL161C biological process unknown protein kinase activity cellular component unknown | YKL162C	0	-0.474915	-0.074823	0	0
YKL165C	YKL165C ... MCD4 GPI anchor biosynthesis* molecular function unknown cell wall (sensu Fungi)* | YKL165C-A		yes	yes	-0.601584	-0.325958	-0.098036		-0.435629	-0.467111	-0.52903	-0.404801		0.42895	0.514923	-0.047298	0.343779		1.32615	1.44612	1.28858	1.50167		0.456961	0.195784	0.299361		0.313158	-0.1755	-0.0487328		-0.139529	-0.132781	-0.0783675		0.0501999	0.00711968	1.32617	1.27355	-0.05088	-0.0393131		YKL165C	YKL165C ... MCD4 GPI anchor biosynthesis* molecular function unknown cell wall (sensu Fungi)* | YKL165C-A	0.184283	0.592894	0.32648	0	1.04576
YKL195W	YKL195W ... MIA40 mitochondrial intermembrane sp molecular function unknown mitochondrion* | YKL196C		.	yes	0.158606	-0.11682	-0.24631		-0.910127	-0.517651	-0.460005	-1.36456		-0.628216	-0.253421	-1.07452	-0.516095		0.137741	-0.266801	-0.351383	0.540799		-0.283427	-0.162796	-0.0136821		-0.232812	0.626428	0.700582		0.786693	0.553469	0.377225		-0.224136	-0.394854	-0.500507	-0.692351	0.316559	0.0997969		YKL195W	YKL195W ... MIA40 mitochondrial intermembrane sp molecular function unknown mitochondrion* | YKL196C	-0.712493	-0.811832	-0.577756	0	-0.106431
YKL201C	YKL201C ... MNN4 response to stress* molecular function unknown membrane | YKL202W		.	yes	-0.748329	-0.549527	-0.619749		-1.21966	-1.38722	-0.987021	-1.1913		-0.476696	-0.894499	-1.04927	-0.893243		0.995203	0.901365	0.504071	0.942989		0.260258	0.334907	0.13636		-0.157783	0.235776	-0.0739843		0.11008	0.0478285	0.154944		-0.271226	0.0350689	0.667011	1.36378	0.147655	0.678318		YKL201C	YKL201C ... MNN4 response to stress* molecular function unknown membrane | YKL202W	-0.828095	-0.696278	-0.615419	0	0.052365
YKR003W	YKR003W ... OSH6 steroid biosynthesis oxysterol binding cellular component unknown | YKR004C		yes	yes	0.184003	-0.117193	-0.114511		-0.144799	-0.362759	-0.12971	-1.17092		-0.846513	-0.0384082	-0.374548	-0.616967		0.0575115	0.165289	0.298153	0.837328		0.0561116	0.458103	0.000585774		0.809214	0.986398	0.706344		0.725823	0.545188	0.936747		-0.516628	-0.598149	-0.129422	-0.976006	0.217415	0.0542154		YKR003W	YKR003W ... OSH6 steroid biosynthesis oxysterol binding cellular component unknown | YKR004C	-0.03974	-0.247257	-0.113608	0	0.277501
YKR016W	YKR016W Ö AIM28 biological process unknown molecular function unknown mitochondrion | Mitochondrial inner membrane protein involved in formation and molecular structure of crista junctions; impairs oligomerization of F1F0-ATP synthase; null shows altered mitochondrial morphology and abnormal mitochondrial genome maintenanceYKR017C		.	yes	-0.201697	-0.292952	-0.785951		-0.897222	-0.382073	-0.418003	-1.82713		-0.742356	-0.0611283	-1.10847	-0.642847		0.29321	-0.823618	-0.1336	0.543692		-0.0481525	0.095779	-0.110932		0.888843	0.926465	0.900909		0.67742	0.661193	0.666581		-0.436156	-0.255361	-0.370812	-0.945863	0.250247	0.288542		YKR016W	YKR016W Ö AIM28 biological process unknown molecular function unknown mitochondrion | Mitochondrial inner membrane protein involved in formation and molecular structure of crista junctions; impairs oligomerization of F1F0-ATP synthase; null shows altered mitochondrial morphology and abnormal mitochondrial genome maintenanceYKR017C	-0.500595	-0.694201	-0.670592	0	0.494546
YKR046C	YKR046C ... PET10 aerobic respiration molecular function unknown lipid particle | YKR047W		.	yes	0.575876	0.898404	1.10388		0.54231	0.313037	0.410544	0.729556		0.273205	0.188557	0.491175	0.388654		0.376626	0.771827	0.516423	0.447788		-0.0805228	-0.176443	-0.136744		0.59675	0.213413	0.333345		-0.0794928	-0.0381827	-0.135253		-0.234612	-0.355486	0.483236	0.655706	0.906437	0.848192		YKR046C	YKR046C ... PET10 aerobic respiration molecular function unknown lipid particle | YKR047W	-0.07158	0.089512	-0.15207	0	0.423355
YKR091W	YKR091W ... SRL3 nucleobase, nucleoside, nucleo molecular function unknown cytoplasm | YKR092C		yes	yes	1.87753	0.626681	2.04104		-1.66179	-0.109993	-0.511606	-0.828732		-0.246398	1.31523	0.6333	0.313208		2.70986	1.9485	1.5846	2.12159		0.320527	0.0277743	-0.207743		3.42993	2.77275	2.44393		2.59773	2.8673	2.81926		-0.729374	-0.505499	0.639604	0.576776	1.80815	1.86183		YKR091W	YKR091W ... SRL3 nucleobase, nucleoside, nucleo molecular function unknown cytoplasm | YKR092C	-0.758785	-0.872705	-0.813804	0	1.11459
YKR093W	YKR093W ... PTR2 peptide transport peptide transporter activity plasma membrane | YKR094C		.	yes	-1.38663	-0.990523	-0.796301		-1.21339	-1.33408	-1.66014	-1.01534		0.54912	0.39686	0.438221	0.493182		0.511733	0.513531	0.812398	0.46967		0.627392	0.582363	0.642775		1.16351	1.25972	1.31511		-0.2905	-0.16454	-0.344851		-0.284056	-0.224505	-1.14699	-1.10808	-0.367378	-0.334108		YKR093W	YKR093W ... PTR2 peptide transport peptide transporter activity plasma membrane | YKR094C	-1.66455	-1.66905	-1.96167	0	0.466197
YLR099C	YLR099C ... ICT1 biological process unknown molecular function unknown cellular component unknown | YLR099W-A		yes	yes	0.605776	0.959808	0.919419		0.366222	0.0599317	0.327026	0.543372		-0.839872	-1.13152	-0.581861	-0.964425		1.07551	1.16734	0.664491	0.621126		0.463815	0.28498	0.503925		-0.325554	-0.000719207	-0.0987798		0.602062	0.347779	0.38178		0.402766	0.565584	0.940967	1.3524	0.516746	0.574794		YLR099C	YLR099C ... ICT1 biological process unknown molecular function unknown cellular component unknown | YLR099W-A	-1.5086	-0.041529	0.289914	0	-1.31852
YLR120C	YLR120C ... YPS1 protein processing aspartic-type endopeptidase activitcell wall (sensu Fungi) | YLR121C		yes	yes	1.67465	1.79384	2.17817		1.55029	1.74941	1.32646	1.73878		0.761864	0.708826	0.214448	0.538868		1.90119	1.83686	1.82403	1.75428		0.570882	0.306533	0.483373		1.33224	0.914794	0.926336		1.06892	1.04674	0.892578		0.23212	0.210038	1.7051	1.88458	1.28575	0.935966		YLR120C	YLR120C ... YPS1 protein processing aspartic-type endopeptidase activitcell wall (sensu Fungi) | YLR121C	-0.257256	3.17394	-0.530656	0	-0.702666
YLR194C	YLR194C ... YLR194C biological process unknown molecular function unknown cell wall (sensu Fungi) | YLR195C		yes	yes	2.1158	1.81199	1.89534		1.1595	1.41223	1.28381	1.13652		-0.325569	-0.526908	-1.21202	-0.793318		1.79078	1.45276	1.38248	1.52486		0.213711	0.453259	0.28421		0.132246	0.955645	0.926501		1.22096	0.889635	1.09874		-0.0189355	-0.0784936	1.71268	1.30567	1.60419	1.53199		YLR194C	YLR194C ... YLR194C biological process unknown molecular function unknown cell wall (sensu Fungi) | YLR195C	1.65774	1.63653	1.36256	0	0.954559
YLR225C	YLR225C ... YLR225C biological process unknown molecular function unknown cytoplasm | YLR226W		yes	yes	1.40883	1.48617	1.20243		0.894257	-0.0555455	1.09108	-0.139		-1.45285	-1.56892	0.268167	-0.975527		0.692227	-0.324517	0.421481	0.993311		-0.0904586	0.496358	0.138941		0.0359143	1.32701	0.704628		1.15112	0.969959	0.849634		-0.0880257	-0.447324	0.290801	-0.256114	0.490644	0.511567		YLR225C	YLR225C ... YLR225C biological process unknown molecular function unknown cytoplasm | YLR226W	0.898828	0.92587	1.10517	0	-0.302071
YLR250W	YLR250W iESR cluster SSP120 protein secretion molecular function unknown cytoplasm | YLR251W		.	yes	1.4905	1.60016	1.55889		1.08096	0.718895	1.70109	0.552128		-1.09028	-0.826904	-0.484395	-0.59729		0.144645	0.0291202	-0.210198	0.353019		0.068674	0.191354	0.00258208		0.112816	0.586784	0.35966		0.403711	0.42682	0.567702		0.119105	-0.250242	0.0734396	-0.714456	0.497345	0.442841		YLR250W	YLR250W iESR cluster SSP120 protein secretion molecular function unknown cytoplasm | YLR251W	0.31547	0.320692	-0.141004	0	0.375718
YLR257W	YLR257W ... YLR257W biological process unknown molecular function unknown cytoplasm | YLR258W		yes	yes	0.970485	1.02576	0.533989		0.349348	0.0404235	0.999933	-0.0819761		-1.38726	-0.66356	-0.0745195	-0.543913		0.564006	0.568019	0.133624	0.828005		0.591189	0.559995	0.857112		0.867934	0.579266	0.923379		0.843918	0.743538	0.768578		0.0732138	0.0887341	0.0586301	-0.0395919	0.321753	0.120411		YLR257W	YLR257W ... YLR257W biological process unknown molecular function unknown cytoplasm | YLR258W	-0.133102	-0.379872	0.116957	0	-0.726576
YLR295C	YLR295C ... ATP14 ATP synthesis coupled proton t hydrogen-transporting ATP synthase proton-transporting ATP synthase co | YLR296W		.	yes	0.493614	0.400928	0.306313		0.0833856	-0.360537	0.066614	-0.497511		-0.706824	-0.56197	-0.243895	-0.378274		0.115546	-0.388082	0.146548	-0.0069485		-0.347287	-0.0636025	-0.110867		0.767707	0.482633	0.573091		0.475387	0.310623	0.422698		-0.270186	-0.178799	-0.313936	0.0360131	0.603426	0.603364		YLR295C	YLR295C ... ATP14 ATP synthesis coupled proton t hydrogen-transporting ATP synthase proton-transporting ATP synthase co | YLR296W	-0.405571	-0.828103	-0.51817	0	-0.744964
YLR303W	YLR303W ... MET17 methionine metabolism* cysteine synthase activity* cytoplasm | YLR304C		yes	yes	0.20956	0.579287	0.903798		-0.0921013	-0.0114295	0.0738501	0.304535		1.32443	1.32659	1.5671	1.15518		1.84979	1.66866	1.73857	1.24935		-0.280524	-0.427261	-0.306542		0.276153	-0.301505	-0.111014		0.159736	0.233491	0.0526674		-0.33904	-0.134739	-0.147306	0.113787	-0.284765	-0.535657		YLR303W	YLR303W ... MET17 methionine metabolism* cysteine synthase activity* cytoplasm | YLR304C	0.25401	0.482141	0.590092	0	0.806049
YLR350W	YLR350W ... ORM2 response to unfolded protein molecular function unknown endoplasmic reticulum | YLR351C		.	yes	0.784596	1.45938	1.47375		0.861189	1.40212	0.915505	1.24927		-0.57838	0.11687	0.444855	-0.134251		0.815693	0.642049	0.726604	0.527363		0.097408	-0.124229	0.139008		-0.222984	-0.105039	0.088986		0.289315	0.26289	0.0821803		-0.0883069	0.0496663	0.721676	1.51516	0.299717	0.341429		YLR350W	YLR350W ... ORM2 response to unfolded protein molecular function unknown endoplasmic reticulum | YLR351C	1.10673	1.61334	1.09828	0	-0.144819
YLR390W-A	YLR390W-A ... CCW14 cell wall organization and bio structural constituent of cell wallmitochondrion* | YLR392C		.	yes	1.18531	1.2842	1.4792		0.740109	0.652481	0.648505	0.913517		0.707301	0.557238	0.840984	0.541847		0.778695	0.772099	0.827012	0.524849		-0.219656	-0.455938	-0.148177		0.96666	0.292644	0.464026		0.385861	0.265342	0.213212		-0.165026	-0.0997959	0.177756	0.403546	1.16547	0.977203		YLR390W-A	YLR390W-A ... CCW14 cell wall organization and bio structural constituent of cell wallmitochondrion* | YLR392C	0.255946	0.368062	0.282852	0	0.346625
YLR414C	YLR414C ... YLR414C biological process unknown molecular function unknown cytoplasm* | YLR415C		.	yes	1.21349	0.872881	1.29754		0.591667	0.584268	0.625469	1.00544		0.110897	-0.153051	-0.058578	0.0441658		1.25015	1.32404	1.09249	1.04808		0.358002	0.22518	0.140516		0.392452	0.401267	0.252978		0.57983	0.41446	0.642095		-0.0171292	0.148495	1.6857	1.55504	1.36674	1.26862		YLR414C	YLR414C ... YLR414C biological process unknown molecular function unknown cytoplasm* | YLR415C	0.995678	0	2.48182	0	1.59457
YML057W	YML057W ... CMP2 cell ion homeostasis* calcium-dependent protein serine/thcytoplasm* | YML058W		yes	yes	0.144742	-0.093095	0.24543		-0.309276	-0.241238	-0.0796944	-0.0575836		0.090293	-0.365573	-0.0809458	-0.0301205		0.567907	0.692557	0.255687	0.412366		0.0464596	0.0530116	-0.208547		0.825831	0.641227	0.559741		0.701251	0.565612	0.690649		-0.23287	-0.200835	0.157394	-0.00330451	0.599826	0.50729		YML057W	YML057W ... CMP2 cell ion homeostasis* calcium-dependent protein serine/thcytoplasm* | YML058W	-0.191529	-0.228888	-0.138527	0	0.350957
YML070W	YML070W ... DAK1 response to stress* glycerone kinase activity cytoplasm | YML071C		yes	yes	-0.253381	-0.634891	-0.325688		-0.260264	-0.417317	-0.209116	-0.27868		-0.10583	-0.0896335	0.155486	0.018622		0.239204	0.445285	0.150124	0.582005		0.129705	0.0739973	-0.213315		0.471551	0.319104	0.199793		0.469655	0.407564	0.61156		-0.240967	-0.107924	-0.00211278	0.182797	0.0377365	0.0123365		YML070W	YML070W ... DAK1 response to stress* glycerone kinase activity cytoplasm | YML071C	-0.272113	-0.364927	-0.330019	0	0.104719
YML091C	YML091C ... RPM2 protein biosynthesis* ribonuclease P activity mitochondrion | YML092C		.	yes	-1.47571	-2.00434	-1.55811		-1.89424	-1.75981	-1.48944	-2.13134		-0.548709	0.0236528	-0.421983	-0.35598		0.567907	0.157352	0.182947	0.454642		-0.29855	-0.321893	-0.461304		0.342036	0.661289	0.297333		0.360035	0.491677	0.397152		-0.398278	-0.235543	-0.406513	-0.262799	0.196442	0.239994		YML091C	YML091C ... RPM2 protein biosynthesis* ribonuclease P activity mitochondrion | YML092C	-0.845421	-0.850056	-0.717128	0	0.335405
YML100W	YML100W iESR cluster TSL1 response to stress* enzyme regulator activity "alpha,alpha-trehalose-phosphate syn" | YML100W-A		yes	yes	-0.569869	-0.256009	-0.107879		-2.69407	-2.52503	-1.7359	-1.8523		0.461681	0.716479	0.573637	0.9296		3.52928	3.95471	3.65465	3.76218		0.331334	0.857155	0.424525		2.78011	1.78189	1.93906		2.47454	1.87912	2.49865		-0.552791	0.109597	0.261035	0.651304	1.39948	1.45174		YML100W	YML100W iESR cluster TSL1 response to stress* enzyme regulator activity "alpha,alpha-trehalose-phosphate syn" | YML100W-A	-1.36552	-1.42062	-1.51047	0	-0.036819
YML120C	YML120C ... NDI1 mitochondrial electron transpo "oxidoreductase activity, acting on"mitochondrial inner membrane | YML121W		yes	yes	-0.772582	-1.34765	-0.524512		-1.3599	-1.09885	-1.57019	-1.58858		0.265087	0.43418	0.269863	0.0762815		0.585609	0.837991	0.823704	1.05837		-0.473682	-0.499077	-0.351244		0.00388153	0.551639	0.511677		0.429492	0.404679	0.322004		-0.714727	-0.36363	-0.684059	-0.464336	0.33748	0.500316		YML120C	YML120C ... NDI1 mitochondrial electron transpo "oxidoreductase activity, acting on"mitochondrial inner membrane | YML121W	-0.576007	-0.858011	-0.940912	0	0.607472
YML130C	YML130C ... ERO1 protein folding* electron carrier activity endoplasmic reticulum | YML131W		yes	yes	-0.023044	-0.311865	-0.112737		-0.299349	0.179513	0.270992	-0.272749		-0.886265	-0.30886	-0.782586	-0.30516		0.980271	0.395195	0.734425	1.04643		0.346752	0.429618	0.330096		0.374283	0.356303	0.379824		0.830141	0.787653	0.927969		0.302756	0.33003	1.38382	1.29004	0.585983	0.58957		YML130C	YML130C ... ERO1 protein folding* electron carrier activity endoplasmic reticulum | YML131W	-0.124891	0.316503	0.148732	0	0.404015
YML131W	YML131W iESR cluster YML131W biological process unknown molecular function unknown cytoplasm | YML132W		yes	yes	0.041289	-0.102017	0.995241		1.31876	-0.109993	0.957325	0.636294		-1.09028	0.183984	0.967301	-0.259127		-0.377606	1.76295	0.761855	0.271612		0.64915	0.205079	0.134754		1.05811	0.731269	0.843148		1.22158	1.3831	1.57537		0.00360257	-0.0157553	0.56113	0.13937	0.0558443	0.0272062		YML131W	YML131W iESR cluster YML131W biological process unknown molecular function unknown cytoplasm | YML132W	0.269604	0.424455	0.509942	0	0.636706
YMR008C	YMR008C ... PLB1 glycerophospholipid metabolism lysophospholipase activity cell wall (sensu Fungi) | YMR009W		yes	yes	-0.473311	-0.0169	0.318254		-0.208996	-0.000247902	-0.291015	0.084815		0.39363	0.5937	0.0932964	0.427967		1.14348	1.07696	1.14902	1.07649		0.50276	0.450317	0.498747		0.770828	0.880452	0.882127		0.740171	0.892526	0.834651		0.149636	0.259373	1.36007	1.73212	1.17991	1.10998		YMR008C	YMR008C ... PLB1 glycerophospholipid metabolism lysophospholipase activity cell wall (sensu Fungi) | YMR009W	0.254762	0.175015	-0.062605	0	0.597795
YMR024W	YMR024W ... MRPL3 protein biosynthesis structural constituent of ribosome mitochondrial large ribosomal subun | YMR025W		.	yes	-0.705144	-0.973516	-0.889474		-1.45116	-0.795885	-0.916277	-1.15303		-0.388719	-0.174613	-0.644215	-0.859421		0.520918	-0.233369	0.0879573	-0.130658		-0.339352	-0.432184	-0.443661		0.119596	0.175937	0.17629		0.301942	0.0390213	0.286794		-0.364853	-0.582892	-0.671183	-1.32288	0.0600085	-0.109003		YMR024W	YMR024W ... MRPL3 protein biosynthesis structural constituent of ribosome mitochondrial large ribosomal subun | YMR025W	-1.20574	-1.23475	-1.01111	0	-0.105075
YMR090W	YMR090W iESR cluster YMR090W biological process unknown molecular function unknown cytoplasm | YMR091C		yes	yes	-0.607696	-0.166868	-0.253962		-0.613429	-0.109993	-0.147857	-1.32623		-0.519964	1.22463		-0.108025		1.20206	1.10844	1.48884	2.28755		0.45665	0.423259	0.380914		2.06291	0.859374	1.00628		1.65685	0.897976	1.25402		0.133963	0.0519427	0.88188	0.582422	0.658858	0.653007		YMR090W	YMR090W iESR cluster YMR090W biological process unknown molecular function unknown cytoplasm | YMR091C	-1.168	-1.82614	-1.9394	0	0.462394
YMR104C	YMR104C ... YPK2 protein amino acid phosphoryla protein kinase activity cytoplasm* | YMR105C		yes	yes	-0.055441	-0.205408	0.361978		-1.12182	-0.832459	-0.201852	-0.636334		-0.867887	-0.834875	0.340518	-0.313574		1.38139	1.18645	0.951969	1.57973		0.185039	-0.0791409	0.132496		1.42297	1.02905	1.25391		1.09135	0.832073	1.16297		-0.186599	-0.293257	0.803103	-0.243403	2.12856	1.93774		YMR104C	YMR104C ... YPK2 protein amino acid phosphoryla protein kinase activity cytoplasm* | YMR105C	0.391286	0.355706	0.354337	0	1.18585
YMR135C	YMR135C ... GID8 negative regulation of glucone molecular function unknown cytoplasm* | YMR135W-A		yes	yes	-0.119446	-0.020531	-0.177595		-1.37639	-0.76207	-0.244719	-0.795717		-1.28292	-0.912877	0.425407	-0.000691443		1.12489	0.775019	0.35844	0.412475		0.301418	1.0656	0.320701		0.636378	1.74537	0.810406		1.43093	0.758399	0.520104		-0.444864	-0.244313	-0.130528	-0.836006	0.167555	0.368596		YMR135C	YMR135C ... GID8 negative regulation of glucone molecular function unknown cytoplasm* | YMR135W-A	-0.385296	-0.852119	-0.451233	0	0.174876
YMR139W	YMR139W iESR cluster RIM11 protein amino acid phosphoryla protein serine/threonine kinase actcytoplasm | YMR140W		yes	yes	-0.13993	-0.435923	-0.242748		-0.639425	-0.895869	-0.73282	-0.681074		-1.35331	-0.552981	-0.43709	-0.457465		0.762777	0.446859	0.774591	0.885063		-0.0127323	-0.0523359	-0.211091		1.27492	0.615904	0.521758		0.83724	0.668275	0.844731		-0.319209	-0.401318	-0.078665	-0.512318	0.303917	0.271268		YMR139W	YMR139W iESR cluster RIM11 protein amino acid phosphoryla protein serine/threonine kinase actcytoplasm | YMR140W	-0.453337	-0.423784	-0.487177	0	0.276766
YMR145C	YMR145C ... NDE1 ethanol fermentation* NADH dehydrogenase activity mitochondrion | YMR146C		.	yes	-1.18765	-0.944811	-0.681876		-0.978453	-1.04428	-1.34063	-1.0694		0.778098	0.669551	0.410439	0.484151		0.4336	0.556668	0.604773	0.502141		-0.40806	-0.458244	-0.596291		0.601431	0.487475	0.227421		-0.274013	-0.139485	-0.170978		-0.185885	-0.210394	0.0338533	-0.244324	0.406218	0.304518		YMR145C	YMR145C ... NDE1 ethanol fermentation* NADH dehydrogenase activity mitochondrion | YMR146C	-1.48547	-1.54961	-1.63683	0	0.286338
YMR169C	YMR169C iESR cluster ALD3 response to stress* aldehyde dehydrogenase activity cytoplasm | YMR170C		yes	yes	0.959988	0.415177	0.540278		-1.28328	0.153041	-0.633284	-0.563271		0.132113	-0.775374	1.4698	-0.143649		5.11794	3.34791	5.18186	4.99824		0.183631	-0.194618	0.993891		0.840519	0.138927	0.92222		1.00238	1.02101	1.13409		0.0616125	-0.368287	2.36776	2.09369	1.45135	1.17007		YMR169C	YMR169C iESR cluster ALD3 response to stress* aldehyde dehydrogenase activity cytoplasm | YMR170C	-1.98506	-2.19564	-1.83357	0	0.392227
YMR170C	YMR170C iESR cluster ALD2 aldehyde metabolism* aldehyde dehydrogenase activity cytoplasm | YMR171C		yes	yes	0.908274	0.566486	0.602644		-0.546315	0.606214	0.375994	0.244084		-0.815419	-0.145323	0.837533	-0.0181185		1.94802	1.51824	1.7165	1.87284		0.567766	0.260435	0.466961		1.04143	0.587828	1.1701		0.646581	0.870388	1.01707		0.190346	0.101411	0.269848	-2.41758	1.04999	1.06165		YMR170C	YMR170C iESR cluster ALD2 aldehyde metabolism* aldehyde dehydrogenase activity cytoplasm | YMR171C	-0.667038	-0.390581	-0.313089	0	0.924779
YMR173W	YMR173W iESR cluster DDR48 DNA repair ATPase activity* cytoplasm | YMR173W-A		yes	yes	-1.04001	-0.37332	-0.888565		-1.69832	-2.31163	-1.63971	-3.83403		-1.18981	-1.10254	-2.02205	-1.79346		2.00942	2.02598	1.45407	3.16778		3.82749	0.953774	2.10937			1.10978	3.56377		2.7729	3.07958	3.51065		0.113085	0.0130426	1.56298	0.532382	-0.764427	-0.757781		YMR173W	YMR173W iESR cluster DDR48 DNA repair ATPase activity* cytoplasm | YMR173W-A	-2.15865	-2.04886	-1.66295	0	-0.685908
YMR184W	YMR184W Ö ADD37 biological process unknown molecular function unknown | Protein of unknown function involved in ER-associated protein degradation; green fluorescent protein (GFP)-fusion protein localizes to the cytoplasm and is induced in response to the DNA-damaging agent MMS; YMR184W is not an essential geneYMR185W		yes	yes	0.457948	0.651065	0.585365		-0.468313	-0.039604	0.0447876	-1.10188		-1.62277	-0.659897	0.855091	-0.535967		1.51638	0.955591	1.36598	1.58094		0.409981	0.840147	0.578854		0.198973	1.24408	0.670681		0.895019	0.875815	0.727462		0.338389	0.303558	1.37371	0.947419	0.894774	0.972612		YMR184W	YMR184W Ö ADD37 biological process unknown molecular function unknown | Protein of unknown function involved in ER-associated protein degradation; green fluorescent protein (GFP)-fusion protein localizes to the cytoplasm and is induced in response to the DNA-damaging agent MMS; YMR184W is not an essential geneYMR185W	0.259178	-0.063437	-0.158432	0	0.850213
YMR192W	YMR192W ... GYL1 ER to Golgi transport* protein binding cytoplasm* | YMR193C-A		.	yes	0.561162	0.204838	-0.037507		-0.0179362	-0.275053	0.449771	-0.300469		-0.523932	0.144456	-0.700124	-0.398906		-0.208174	0.303514	-0.147473	0.397852		-0.0704518	0.065955	-0.20744		0.445955	0.789023	0.623144		0.888653	0.768093	0.991145		0.00660975	-0.0404821	0.119295	-0.507419	0.626014	0.846678		YMR192W	YMR192W ... GYL1 ER to Golgi transport* protein binding cytoplasm* | YMR193C-A	0.137152	0.081838	-0.051282	0	0.425062
YMR197C	YMR197C iESR cluster VTI1 vesicle fusion* v-SNARE activity integral to Golgi membrane | YMR198W		yes	yes	0.21333	0.133074	-0.017583		-1.15929	-0.183994	-0.191653	-0.994335		-1.34593	-0.190411	-1.95646	-0.524471		0.921954	-0.180127	0.173481	0.418716		-0.33316	-0.0571146	0.564778		0.20825	1.02489	0.854545		1.29663	1.13111	0.657138		-0.173393	-3.49e-05	-0.182528	0.539301	0.872934	0.691527		YMR197C	YMR197C iESR cluster VTI1 vesicle fusion* v-SNARE activity integral to Golgi membrane | YMR198W	-0.226149	-0.12666	-0.285384	0	0.205298
YMR214W	YMR214W ... SCJ1 protein folding* chaperone binding endoplasmic reticulum lumen | YMR215W		.	yes	-0.067041	-0.112728	-0.055155		-0.0632323	-0.332386	0.0820206	-0.0799486		-1.00539	-0.730286	-0.202624	-0.69619		0.406753	0.219804	-0.171578	0.302863		0.0629172	0.170816	0.379469		0.319267	0.108194	0.287162		0.605235	0.456781	0.350567		0.215241	0.210436	0.568362	0.921424	-0.0965293	-0.342743		YMR214W	YMR214W ... SCJ1 protein folding* chaperone binding endoplasmic reticulum lumen | YMR215W	0.012574	-0.001054	0.03079	0	0.086261
YMR226C	YMR226C ... YMR226C metabolism "oxidoreductase activity, acting on"cytoplasm* | YMR227C		yes	yes	0.215275	0.045813	-0.111792		-0.166382	-0.3604	0.0642838	-0.788337		-0.749567	-0.145323	0.0774836	-0.198791		0.238899	0.0691471	0.0798828	0.464257		0.135054	0.291576	0.343435		1.03055	0.522624	0.75857		0.790331	0.63174	0.921866		-0.13149	-0.173323	-0.0928362	0.153431	0.124935	0.0401467		YMR226C	YMR226C ... YMR226C metabolism "oxidoreductase activity, acting on"cytoplasm* | YMR227C	-0.112186	-0.037458	-0.142806	0	0.224441
YMR238W	YMR238W ... DFG5 pseudohyphal growth* molecular function unknown anchored to plasma membrane | YMR239C		yes	yes	-0.184488	-0.225948	0.01622		-0.511268	-0.36022	-0.15591	-0.308027		0.201376	0.2444	0.203014	0.317031		0.876523	0.874263	0.710614	0.894758		-0.115667	-0.158469	0.196106		1.11741	1.05286	1.20691		0.961696	0.919254	0.811064		-0.232948	-0.147987	0.264695	0.389017	0.779393	0.782787		YMR238W	YMR238W ... DFG5 pseudohyphal growth* molecular function unknown anchored to plasma membrane | YMR239C	-0.16612	-1.33977	-0.523722	0	1.50943
YMR250W	YMR250W iESR cluster GAD1 response to oxidative stress* glutamate decarboxylase activity cytoplasm | YMR251W		yes	yes	0.301025	0.211643	0.459835		-0.35367	-0.738025	-0.317782	-0.83176		0.0617238	0.629016	-0.0220521	-0.17113		1.40173	2.50145	1.86205	2.33873		0.242525	0.212806	0.663743		2.18892	2.17862	2.10433		2.15438	2.75028	2.32357		-0.135644	0.514421	0.835525	1.04185	2.2548	2.26328		YMR250W	YMR250W iESR cluster GAD1 response to oxidative stress* glutamate decarboxylase activity cytoplasm | YMR251W	-1.40699	-1.4554	-1.95917	0	-0.065727
YMR261C	YMR261C ... TPS3 response to stress* "alpha,alpha-trehalose-phosphate syn""alpha,alpha-trehalose-phosphate syn" | YMR262W		yes	yes	-0.390167	-0.413932	-0.189034		-0.431573	-0.378928	-0.37223	-0.236907		0.165171	0.289396	0.263807	0.245786		0.380784	0.374103	0.414743	0.432789		0.370352	0.267978	-0.0534146		1.04461	0.486989	0.639317		0.619684	0.493821	0.864254		-0.104607	0.108063	-0.209598	0.344041	0.306085	0.585665		YMR261C	YMR261C ... TPS3 response to stress* "alpha,alpha-trehalose-phosphate syn""alpha,alpha-trehalose-phosphate syn" | YMR262W	-0.354072	-0.393677	-0.400579	0	0.389065
YMR286W	YMR286W ... MRPL33 protein biosynthesis structural constituent of ribosome mitochondrial large ribosomal subun | YMR287C		.	yes	-0.686995	-0.642927	-0.736563		-0.651013	-0.481962	-1.09272	-1.09303		-1.8113	-0.105522	-0.8641	-0.231706		-0.944779	-0.505089	0.426295	0.0128778		-0.451667	0.207393	0.107102		-0.270513	0.166542	0.430182		0.233601	0.0578126	-0.0824274		-0.422956	-0.724572	-0.928761	-1.84108	-0.0959567	-0.25677		YMR286W	YMR286W ... MRPL33 protein biosynthesis structural constituent of ribosome mitochondrial large ribosomal subun | YMR287C	-1.73013	-2.47719	-1.09401	0	-1.66535
YMR295C	YMR295C ... YMR295C biological process unknown molecular function unknown bud | YMR296C		.	yes	0.068592	0.17802	-0.08738		-0.349014	-0.387527	-0.37128	-0.757805		-0.31083	-0.465519	-0.14955	-0.457508		0.220921	0.0234066	0.466684	0.481477		-0.231244	-0.187423	0.0366408		0.597825	0.289486	0.640054		0.679258	0.46373	0.505994		-0.350587	-0.12353	0.0800352	0.460828	0.50162	0.415431		YMR295C	YMR295C ... YMR295C biological process unknown molecular function unknown bud | YMR296C	-0.884899	-0.546512	-0.575855	0	-0.499119
YMR315W	YMR315W iESR cluster YMR315W biological process unknown molecular function unknown cytoplasm* | YMR315W-A		yes	yes	-0.374194	-0.655331	-0.10269		-0.768708	-0.495283	-0.654703	-0.661518		0.0551512	0.516181	0.899945	0.541883		1.80737	1.61152	1.65556	1.72527		-0.750654	-0.724142	-1.10564		1.22271	0.763209	0.690822		1.27976	1.15467	1.42585		-0.436583	-0.189519	0.135884	0.847977	0.550517	0.753366		YMR315W	YMR315W iESR cluster YMR315W biological process unknown molecular function unknown cytoplasm* | YMR315W-A	-0.501681	-0.56617	-0.579212	0	0.703557
YMR316W	YMR316W ... DIA1 pseudohyphal growth* molecular function unknown cytoplasm | YMR317W		yes	yes	1.4054	0.434036	0.610901		0.964647	0.954137	0.869701	0.579792		-1.18981	-0.0384082	-0.659482	-0.244578		1.11904	1.56977	0.691145	1.44564		0.105021	0.178334	0.454525		-0.0905341	0.29338	0.66183		0.909359	0.713325	0.703556		-0.135644	-0.0684873	0.384045	-0.400504	0.467583	0.178373		YMR316W	YMR316W ... DIA1 pseudohyphal growth* molecular function unknown cytoplasm | YMR317W	2.14424	1.77628	1.72452	0	1.09836
YMR318C	YMR318C ... ADH6 aldehyde metabolism* alcohol dehydrogenase (NADP+) activsoluble fraction | YMR319C		.	yes	-0.476008	-0.367485	-0.254527		-0.0284669	-0.287489	-0.190561	-0.0999558		0.551003	0.310276	0.601096	0.510563		0.169882	0.0205333	0.176846	0.173888		0.181936	0.102661	0.0539876		0.889489	0.858188	0.761016		0.429034	0.417901	0.370349		-0.019902	0.11276	-0.366662	-0.0200608	0.0831259	0.23926		YMR318C	YMR318C ... ADH6 aldehyde metabolism* alcohol dehydrogenase (NADP+) activsoluble fraction | YMR319C	-0.473747	-0.417976	-0.375939	0	0.218069
YNL015W	YNL015W iESR cluster PBI2 vacuole fusion, non-autophagic endopeptidase inhibitor activity cytoplasm* | YNL016W		yes	yes	-0.922878	-0.217915	-0.711027		-1.81933	-1.52503	-2.11568	-3.02667		-0.918513	-0.0384082	-1.77813	0.200305		1.53298	1.99741	1.69905	2.95967		0.556633	0.553843	0.178316		0.689959	1.20932	1.10433		1.89915	1.59571	1.7241		0.0590133	0.118485	0.324872	-0.400504	0.845627	1.00641		YNL015W	YNL015W iESR cluster PBI2 vacuole fusion, non-autophagic endopeptidase inhibitor activity cytoplasm* | YNL016W	-0.588662	-1.04478	-0.74299	0	0.365505
YNL040W	YNL040W ... YNL040W biological process unknown molecular function unknown cytoplasm | YNL041C		.	yes	-0.307944	-0.032713	-0.118177		-0.37639	-0.266113	0.480174	-0.775539		-0.61413	-0.0384082	0.0103694	-0.205934		0.116332	-0.224981	-0.222759	0.45653		-0.0483128	-0.0359423	-0.182987		0.571485	0.143402	0.360512		0.467793	0.371117	0.617626		-0.161043	-0.246825	-0.620429	-0.772473	-0.0587957	-0.0358827		YNL040W	YNL040W ... YNL040W biological process unknown molecular function unknown cytoplasm | YNL041C	-0.231232	-0.234669	-0.383482	0	0.635696
YNL044W	YNL044W ... YIP3 ER to Golgi transport molecular function unknown COPII-coated vesicle | YNL045W		.	yes	0.350171	0.127904	0.710248		0.201377	0.0616181	0.124188	0.302418		0.432346	0.199091	0.08977	0.301704		0.43881	0.473175	0.396725	0.480445		-0.105399	-0.127467	-0.223632		0.0161085	0.348583	0.281287		0.153079	0.0939782	0.25671		-0.0298589	-0.186043	0.157021	-0.100784	-0.135094	-0.208271		YNL044W	YNL044W ... YIP3 ER to Golgi transport molecular function unknown COPII-coated vesicle | YNL045W	0.08733	0.422841	0.101683	0	0.168489
YNL049C	YNL049C ... SFB2 ER to Golgi transport molecular function unknown COPII vesicle coat | YNL050C		.	yes	-0.39214	-0.250429	-0.279439		-0.371985	-0.223949	-0.080139	-0.315321		-0.426618	0.133544	-0.29175	-0.183012		0.28849	0.496886	0.261603	0.451021		-0.0426188	-0.094785	-0.219312		-0.153285	-0.14774	-0.247821		0.238863	0.136275	0.351086		0.0474307	-0.0355017	0.293886	-0.218547	-0.193091	-0.070225		YNL049C	YNL049C ... SFB2 ER to Golgi transport molecular function unknown COPII vesicle coat | YNL050C	-0.462752	-0.008352	-0.120127	0	0.10618
YNL055C	YNL055C iESR cluster POR1 aerobic respiration* voltage-gated ion-selective channelmitochondrial outer membrane | YNL056W		yes	yes	-1.43	-1.31815	-0.860735		-1.7626	-1.40354	-1.77348	-1.46944		0.492232	0.728442	1.18064	0.586381		1.00728	1.03462	1.20149	1.02319		-0.143206	-0.178503	-0.228895		1.50529	0.590187	0.578139		0.461746	0.29729	0.175541		-0.28178	-0.148007	-0.695515	0.00545127	0.559364	0.316301		YNL055C	YNL055C iESR cluster POR1 aerobic respiration* voltage-gated ion-selective channelmitochondrial outer membrane | YNL056W	-0.818453	-0.945313	-1.19601	0	0.347133
YNL079C	YNL079C ... TPM1 actin filament organization* actin lateral binding contractile ring (sensu Saccharomyc | YNL080C		.	yes	0.033989	0.408622	-0.496019		-0.385562	-0.390581	0.105952	-0.733509		-1.11239	-0.437873	-0.875027	-0.655224		0.0881943	-0.534734	-0.191778	0.0270346		-0.182988	0.0574451	0.283856		-0.803438	0.196771	0.510094		0.76955	0.744323	0.545211		0.059396	0.0372565	0.250782	-0.465431	0.19014	0.0252894		YNL079C	YNL079C ... TPM1 actin filament organization* actin lateral binding contractile ring (sensu Saccharomyc | YNL080C	-1.10039	-1.21502	-0.292465	0	-1.20284
YNL134C	YNL134C iESR cluster YNL134C biological process unknown alcohol dehydrogenase (NADP+) activcytoplasm* | YNL135C		yes	yes	-1.73516	-1.56733	-1.11018		-1.20236	-1.30264	-1.26454	-0.511107		1.04638	0.319144	0.0963426	0.322527		2.71991	2.28598	1.65644	1.48107		-0.18762	0.209672	0.806521		0.484375	1.65998	2.09854		2.2758	1.8439	1.72378		0.118455	0.189251	0.269192	-0.00149208	0.0887043	-0.253308		YNL134C	YNL134C iESR cluster YNL134C biological process unknown alcohol dehydrogenase (NADP+) activcytoplasm* | YNL135C	-0.826749	-0.982945	-0.888121	0	0.725462
YNL192W	YNL192W ... CHS1 cytokinesis, completion of sep chitin synthase activity plasma membrane* | YNL193W		.	yes	-0.047712	-0.039695	-0.00257		-0.232655	0.0528895	0.0265485	0.098521		-0.248232	-0.189773	-0.522967	-0.11661		0.614506	0.522624	0.375601	0.576006		0.252916	0.0802417	0.0716833		0.310969	0.347719	0.348681		0.317391	0.31609	0.476477		-0.147348	-0.202959	0.311244	0.191618	0.652982	0.686941		YNL192W	YNL192W ... CHS1 cytokinesis, completion of sep chitin synthase activity plasma membrane* | YNL193W	-0.138915	-0.028947	-0.261449	0	0.497555
YNL208W	YNL208W iESR cluster YNL208W biological process unknown molecular function unknown mitochondrion | YNL209W		yes	yes	0.826347	0.332625	0.382034		-0.764187	-0.35843	-0.364325	-0.441709		-0.987394	-0.791768	-0.976964	-0.973076		1.18751	0.92392	0.890296	0.935317		0.0617537	0.445584	0.748628		0.406814	0.434876	0.626069		1.05641	0.619638	0.630093		-0.286036	0.0332712	0.641432	0.734875	0.369089	0.361147		YNL208W	YNL208W iESR cluster YNL208W biological process unknown molecular function unknown mitochondrion | YNL209W	-0.607757	-0.93675	-0.407886	0	-0.680881
YNL274C	YNL274C Ö iESR cluster GOR1 metabolism "oxidoreductase activity, acti | Glyoxylate reductase; null mutation results in increased biomass after diauxic shift; the authentic, non-tagged protein is detected in highly purified mitochondria in high-throughput studiesYNL275W		yes	yes	0.642798	-0.05629	0.050034		-0.339864	-0.109993	0.514273	-0.463735		-1.56833	-0.453446	0.769361	0.2549		0.857414	1.43037	1.51531	2.02769		-0.0205097	0.492443	-0.166574		1.31445	1.40676	1.15714		1.89067	1.04615	2.12363		-0.321716	-0.450358	-0.267286	-0.0956496	1.18666	1.16758		YNL274C	YNL274C Ö iESR cluster GOR1 metabolism "oxidoreductase activity, acti | Glyoxylate reductase; null mutation results in increased biomass after diauxic shift; the authentic, non-tagged protein is detected in highly purified mitochondria in high-throughput studiesYNL275W	-0.057178	-0.268042	-0.086228	0	0.740024
YNR001C	YNR001C iESR cluster CIT1 tricarboxylic acid cycle* citrate (Si)-synthase activity mitochondrion* | YNR001W-A		yes	yes	-0.74504	-1.20178	-0.643948		-1.4987	-1.63262	-1.68769	-1.57416		-0.0138064	0.127765	-0.134162	-0.192797		0.637448	0.809066	0.853728	0.710138		-0.0756513	0.0191354	-0.24188		1.72949	1.44152	1.19293		1.38284	0.99041	0.975261		-0.166331	-0.0213171	0.00281034	-0.217146	0.776012	0.766339		YNR001C	YNR001C iESR cluster CIT1 tricarboxylic acid cycle* citrate (Si)-synthase activity mitochondrion* | YNR001W-A	-0.655448	-0.902183	-0.904946	0	0.449827
YNR035C	YNR035C ... ARC35 actin cytoskeleton organizatio structural molecule activity cytosol* | YNR036C		.	yes	-0.006196	-0.377423	-0.260478		-0.516742	-0.413185	-0.314942	-0.718549		-0.461411	-0.388905	-0.594631	-0.505865		0.353752	-0.0498943	0.153369	0.242347		-0.121553	-0.202557	-0.0425509		-0.338004	-0.00255854	0.427788		0.431527	0.445766	0.332929		-0.248343	-0.358387	-0.291799	-0.286778	-0.0283199	-0.0217258		YNR035C	YNR035C ... ARC35 actin cytoskeleton organizatio structural molecule activity cytosol* | YNR036C	-0.303467	-0.289142	-0.004837	0	0.020403
YNR065C	YNR065C ... YSN1 biological process unknown molecular function unknown cellular component unknown | YNR066C		yes	yes	-0.056787	0.020789	-0.0776		0.183037	0.449434	0.334294	-0.322919		-0.452849	0.173096	-0.507479	0.0773209		0.760058	0.497485	0.555951	1.31934		-0.18811	0.21394	-0.114815		1.36025	1.53668	1.38216		1.77218	1.36612	1.574		0.282117	0.104332	2.06501	1.67999	2.25102	2.14708		YNR065C	YNR065C ... YSN1 biological process unknown molecular function unknown cellular component unknown | YNR066C	0.620223	-0.253299	-1.01683	0	1.30915
YOL016C	YOL016C ... CMK2 protein amino acid phosphoryla calcium- and calmodulin-dependent pcytoplasm | YOL017W		yes	yes	0.91	0.044293	0.055633		0.694693	-0.247497	0.866642	0.489768		-0.590353	-0.834875	-0.352201	0.278375		0.800831	0.938518	0.540126	1.06271		0.0339381	0.311081	0.641589		0.59129	0.56319	0.77789		1.3538	1.07633	0.876664		0.0771501	0.0454605	0.1394	-0.00471454	1.52972	1.45214		YOL016C	YOL016C ... CMK2 protein amino acid phosphoryla calcium- and calmodulin-dependent pcytoplasm | YOL017W	0.358148	0.250674	0.288041	0	0.229476
YOL019W	YOL019W ... YOL019W biological process unknown molecular function unknown plasma membrane* | YOL019W-A		.	yes	-0.562099	-0.41233	-0.357349		-1.37278	-0.739156	-0.810264	-0.665617		-0.637767	-0.252533	-0.199695	-0.573637		0.857414	0.335408	0.365875	0.158572		0.153715	0.0657141	-0.00610888		0.377644	0.255228	0.123379		0.160032	0.171807	0.0439026		0.000845991	-0.0610718	0.317676	0.39163	1.42883	1.58434		YOL019W	YOL019W ... YOL019W biological process unknown molecular function unknown plasma membrane* | YOL019W-A	-0.841878	-1.07247	-1.02793	0	0.327348
YOL031C	YOL031C ... SIL1 SRP-dependent cotranslational molecular function unknown endoplasmic reticulum | YOL032W		yes	yes	-0.04938	0.130644	-0.076312		-0.12005	0.552972	0.174071	-0.911194		-0.993418	0.836061	-0.530199	-0.328489		1.28359	1.09998	0.740376	1.8586		0.263209	0.299579	0.296279		0.245102	0.295371	0.317455		0.687383	0.685064	0.867016		0.299549	0.0350689	1.20324	0.656829	0.78882	1.09406		YOL031C	YOL031C ... SIL1 SRP-dependent cotranslational molecular function unknown endoplasmic reticulum | YOL032W	-0.252289	-0.028015	-0.294946	0	0.223207
YOL055C	YOL055C ... THI20 thiamin biosynthesis phosphomethylpyrimidine kinase acticellular component unknown | YOL056W		yes	yes	0.140561	-0.087917	0.306691		0.401217	0.822892	0.214713	0.0618388		-0.559765	1.02572	-0.115161	-0.343948		0.839492	0.868128	1.30886	1.45858		-0.310016	-0.546684	-0.523957		1.09206	0.741537	0.884166		0.84453	0.995794	1.13466		0.0709536	0.373871	1.09836	1.54821	1.13008	1.45396		YOL055C	YOL055C ... THI20 thiamin biosynthesis phosphomethylpyrimidine kinase acticellular component unknown | YOL056W	0.645849	1.01293	0.835818	0	1.06899
YOL122C	YOL122C ... SMF1 manganese ion transport "di-, tri-valent inorganic cation tr"plasma membrane* | YOL123W		yes	yes	-0.714632	-0.551344	-0.328027		-1.41494	-1.56434	-1.61395	-1.31509		-0.309505	-0.363248	-0.445576	-0.266133		1.08742	1.24844	1.03651	1.12064		-0.0162933	-0.129465	-0.137105		0.389857	0.286658	0.325048		0.275617	0.128008	0.283592		-0.0243885	-0.189526	1.06428	1.17452	2.08911	1.76994		YOL122C	YOL122C ... SMF1 manganese ion transport "di-, tri-valent inorganic cation tr"plasma membrane* | YOL123W	-0.207998	-0.113645	-0.997507	0	0.264824
YOL126C	YOL126C ... MDH2 gluconeogenesis* L-malate dehydrogenase activity cytoplasm* | YOL127W		yes	yes	-0.582065	-0.798007	-0.249155		-0.331721	-0.941116	-0.740911	-0.488961		0.491656	-0.197764	-0.757735	0.185953		0.918652	0.953122	1.0943	1.01574		0.683097	0.516229	-0.315964		1.31445	1.06671	0.698695		0.823496	0.973321	1.19146		0.0694231	0.298103	1.01653	1.62408	2.33473	2.48825		YOL126C	YOL126C ... MDH2 gluconeogenesis* L-malate dehydrogenase activity cytoplasm* | YOL127W	-0.402291	-0.779762	-0.119465	0	-0.017712
YOL151W	YOL151W iESR cluster GRE2 response to stress oxidoreductase activity* cytoplasm* | YOL152W		yes	yes	-0.725903	-1.15013	-1.18402		-1.37639	-1.41812	-1.06917	-0.980735		-0.545959	-0.184259	-0.374548	-0.101829		1.00942	0.997411	0.903874	0.968851		0.580026	0.908193	0.712709		1.21011	1.20932	1.26421		0.837654	0.735291	0.832282		-0.0993237	-0.125691	0.184841	-0.591478	0.0869772	-0.12298		YOL151W	YOL151W iESR cluster GRE2 response to stress oxidoreductase activity* cytoplasm* | YOL152W	-0.269741	-0.163366	-0.366749	0	0.748747
YOR028C	YOR028C ... CIN5 regulation of transcription fr DNA binding* nucleus | YOR029W		yes	yes	-0.316851	0.093807	-0.119178		-1.37639	-1.52503	-1.60729	-2.94094		-1.28292	-0.71648	0.0103694	-0.588434		1.42445	1.26045	1.68148	2.10169		-1.75748	2.46073	0.256926		1.89941	1.47235	1.35731		4.95931	2.24778	2.22403		-0.158217	0.19072	-0.54482	0.00996062	1.19424	1.56049		YOR028C	YOR028C ... CIN5 regulation of transcription fr DNA binding* nucleus | YOR029W	0	0	-1.49031	0	0.604832
YOR042W	YOR042W ... CUE5 biological process unknown molecular function unknown cytoplasm | YOR043W		.	yes	0.200996	-0.285476	-0.346585		-0.330587	-0.380082	0.0447876	-0.810667		-1.50016	-0.351566	-0.324615	-0.898072		-0.183228	0.302266	-0.246685	0.156135		0.0504769	0.238894	0.00769692		0.223847	0.242754	0.340859		0.543793	0.259341	0.525796		0.0387151	-0.121711	-0.0973611	-0.531749	1.39817	1.18669		YOR042W	YOR042W ... CUE5 biological process unknown molecular function unknown cytoplasm | YOR043W	-0.49968	-0.700568	-0.375979	0	-0.424783
YOR052C	YOR052C iESR cluster YOR052C biological process unknown molecular function unknown nucleus | YOR053W		yes	yes	1.045	1.10527	0.53674		0.00469997	0.112399	0.541021	-0.0811192		-2.12423	-1.36034	-0.2927	-0.122433		0.845918	-0.0614823	0.683275	0.574175		0.489318	0.271256	0.62574		0.418286	0.747663	1.15593		1.10586	0.805128	0.919668		0.14441	0.174005	0.798302	0.383004	2.1359	1.9685		YOR052C	YOR052C iESR cluster YOR052C biological process unknown molecular function unknown nucleus | YOR053W	-1.01378	-1.33631	-0.015962	0	-1.78707
YOR099W	YOR099W ... KTR1 O-linked glycosylation* "alpha-1,2-mannosyltransferase activ"Golgi apparatus | YOR100C		.	yes	-0.19963	-0.202219	0.328661		-0.296754	-0.0874947	-0.180517	0.0726974		0.40172	0.157422	0.179809	0.324222		0.630727	0.433777	0.429121	0.505098		0.152813	0.0496703	0.0360663		0.747925	0.265789	0.282671		0.146976	0.139447	0.292118		-0.0575426	-0.10271	0.495934	0.85908	1.02489	1.03506		YOR099W	YOR099W ... KTR1 O-linked glycosylation* "alpha-1,2-mannosyltransferase activ"Golgi apparatus | YOR100C	-0.469228	-0.247897	-0.177185	0	0.112469
YOR122C	YOR122C ... PFY1 response to osmotic stress* actin monomer binding actin cap* | YOR123C		.	yes	-0.300789	-0.169638	0.254407		-0.637042	-0.362832	-0.536974	-0.296366		0.0366172	-0.00803455	0.123874	0.044776		0.237918	-0.0164726	0.314796	0.0465619		0.0703934	-0.0401382	0.0645941		0.130346	-0.0510952	-0.0639861		-0.0970536	-0.0639994	-0.251396		-0.138813	0.0525167	-0.154546	0.215929	0.800484	0.771636		YOR122C	YOR122C ... PFY1 response to osmotic stress* actin monomer binding actin cap* | YOR123C	-0.913668	-1.38717	-0.72908	0	-0.904079
YOR127W	YOR127W ... RGA1 actin filament organization* signal transducer activity* intracellular | YOR128C		yes	yes	0.299877	0.372765	0.28109		0.273751	0.268518	0.470204	0.0500735		-0.558783	0.0826072	-0.251624	-0.232307		0.0521669	0.0991649	-0.065429	0.486977		0.270377	0.225356	0.143035		0.218525	0.923768	0.788197		0.847148	1.00552	1.03977		0.0825146	-0.0851431	0.192146	-0.124294	1.43616	1.41067		YOR127W	YOR127W ... RGA1 actin filament organization* signal transducer activity* intracellular | YOR128C	0.002135	-0.003602	-0.027425	0	0.348215
YOR136W	YOR136W ... IDH2 tricarboxylic acid cycle* isocitrate dehydrogenase (NAD+) actmitochondrion* | YOR137C		yes	yes	-1.22337	-1.16667	-0.82107		-1.32668	-1.53359	-1.46495	-1.40762		0.531899	0.453508	0.117419	0.467922		0.478508	0.737122	0.612131	0.718128		0.344562	0.410108	0.290549		0.77603	0.673263	0.682925		0.580951	0.300669	0.346049		0.190188	0.123296	0.37665	0.0406719	1.43688	1.34583		YOR136W	YOR136W ... IDH2 tricarboxylic acid cycle* isocitrate dehydrogenase (NAD+) actmitochondrion* | YOR137C	-1.25873	-1.39506	-1.44495	0	0.098185
YOR142W	YOR142W ... LSC1 tricarboxylic acid cycle* succinate-CoA ligase (ADP-forming) mitochondrion* | YOR143C		.	yes	-0.796609	-0.596349	-0.231128		-1.20841	-1.01378	-0.850287	-0.676165		0.561056	0.456127	0.494892	0.663504		0.837937	0.834285	0.598327	0.565469		0.050956	-0.144621	-0.198754		0.566893	0.343595	0.31738		0.139278	0.267408	0.181343		-0.336666	-0.349385	-0.271009	-0.0541991	1.47103	1.3567		YOR142W	YOR142W ... LSC1 tricarboxylic acid cycle* succinate-CoA ligase (ADP-forming) mitochondrion* | YOR143C	-0.565943	-0.841549	-0.768668	0	0.515627
YOR153W	YOR153W ... PDR5 response to drug* xenobiotic-transporting ATPase actimitochondrion* | YOR154W		.	yes	-0.533202	-0.166672	0.021797		-0.202825	-0.23512	-0.157966	0.106881		0.715211	0.590889	0.666899	0.614405		0.901485	0.840891	0.764757	0.86055		0.291078	0.143343	0.181633		0.540619	0.358503	0.328276		0.173969	0.114063	0.174264		0.163238	0.0760336	-0.00951496	-0.0177051	0.82991	0.866382		YOR153W	YOR153W ... PDR5 response to drug* xenobiotic-transporting ATPase actimitochondrion* | YOR154W	-0.157334	-0.121612	-0.226717	0	0.498734
YOR155C	YOR155C ... ISN1 inosine salvage IMP 5'-nucleotidase activity cellular component unknown | YOR156C		.	yes	0.270631	0.05802	0.307832		0.282573	-0.252012	0.149124	-0.183566		-0.208924	-0.453446	-0.0447722	-0.0680984		0.0411261	0.260446	-0.079447	0.3506		-0.00708918	0.0132747	0.184222		0.858385	0.539465	0.393841		0.552349	0.681437	0.570298		-0.0586817	-0.192109	-0.0311708	0.508296	1.11654	1.15356		YOR155C	YOR155C ... ISN1 inosine salvage IMP 5'-nucleotidase activity cellular component unknown | YOR156C	-0.447854	-0.050612	-0.027397	0	-0.042344
YOR176W	YOR176W ... HEM15 heme biosynthesis ferrochelatase activity mitochondrial inner membrane | YOR177C		yes	yes	-0.1104	0.104975	0.179152		-0.646717	-0.592594	-0.346637	-0.199625		0.191492	0.219904	-0.773373	-0.0960314		0.999636	1.1999	0.756029	0.915784		0.109599	0.110655	-0.0830709		0.39338	0.437075	0.266605		0.521634	0.339762	0.411725		-0.239099	-0.0292401	0.131984	-0.135506	0.912582	1.08013		YOR176W	YOR176W ... HEM15 heme biosynthesis ferrochelatase activity mitochondrial inner membrane | YOR177C	-0.073631	-0.40464	-0.051976	0	0.093227
YOR187W	YOR187W ... TUF1 translational elongation GTPase activity* mitochondrial matrix | YOR188W		.	yes	-1.02761	-1.03312	-0.51509		-0.897978	-0.859287	-1.14718	-1.02544		0.564429	0.408303	0.657683	0.367373		0.169563	0.219496	0.365674	0.235988		-0.219541	-0.266646	-0.457062		0.772266	0.618571	0.503243		0.254859	0.154192	0.195202		-0.407661	-0.347515	-0.928119	-0.760935	0.952834	0.897163		YOR187W	YOR187W ... TUF1 translational elongation GTPase activity* mitochondrial matrix | YOR188W	-0.991854	-1.08703	-1.09321	0	0.415233
YOR198C	YOR198C ... BFR1 meiosis* RNA binding nuclear envelope-endoplasmic reticu | YOR199W		.	yes	0.088326	-0.112378	-0.482967		-0.176596	-0.360955	0.0314821	-0.813219		-1.04374	-0.554714	-0.975509	-0.853029		-0.0622207	-0.40613	-0.303164	0.0296574		0.0514734	0.115446	0.0553766		-0.479438	0.0930216	0.0650898		0.390271	0.285896	0.388453		0.10895	0.021394	0.281897	-0.377421	0.994228	0.894096		YOR198C	YOR198C ... BFR1 meiosis* RNA binding nuclear envelope-endoplasmic reticu | YOR199W	-0.206994	-0.210812	-0.388291	0	0.101825
YOR220W	YOR220W Ö iESR cluster RCN2 biological process unknown molecular function unknown | Protein of unknown function; green fluorescent protein (GFP)-fusion protein localizes to the cytoplasm and is induced in response to the DNA-damaging agent MMS; phosphorylated in response to alpha factorYOR221C		yes	yes	0.566508	0.162455	0.174276		-0.234371	0.375434	0.36347	0.222823		-0.555943	-0.434337	-0.684004	-0.249583		1.17934	0.52348	0.781884	0.645343		0.00436497	0.160225	0.2798		0.37585	0.520849	0.777663		1.13731	0.803459	1.11836		-0.204533	-0.0478241	0.542049	0.829193	1.65562	1.6286		YOR220W	YOR220W Ö iESR cluster RCN2 biological process unknown molecular function unknown | Protein of unknown function; green fluorescent protein (GFP)-fusion protein localizes to the cytoplasm and is induced in response to the DNA-damaging agent MMS; phosphorylated in response to alpha factorYOR221C	0.24415	0.100405	0.125785	0	-0.071263
YOR285W	YOR285W iESR cluster YOR285W biological process unknown molecular function unknown mitochondrion* | YOR286W		.	yes	-0.972897	-2.24779	0.235424		-1.96135	-2.43192	-0.156846	-0.741269		-1.28292	-1.36034	0.531202	-0.285668		2.00942	2.0678	0.867348	1.74554		-0.0349413	-0.0576987	-0.0975738		0.243163	-0.00615577	-0.0564002		0.0361376	-0.036281	-0.183005		-0.323707	-0.101879	-0.0613328	0.616079	1.17615	1.21557		YOR285W	YOR285W iESR cluster YOR285W biological process unknown molecular function unknown mitochondrion* | YOR286W	-1.05344	-1.33545	-1.00411	0	-0.421348
YOR288C	YOR288C ... MPD1 protein folding protein disulfide isomerase activitvacuole (sensu Fungi) | YOR289W		yes	yes	0.168306	0.183261	0.739465		-0.255084	-0.254383	-0.336303	-0.463735		-0.867887	0.613668	-0.530199	-0.728612		0.783141	0.47195	0.895462	0.831421		0.348653	0.103723	0.398875		-1.54905	0.070252	-0.0756447		0.367825	0.473343	0.463817		0.144852	-0.10189	0.626429	0.263893	1.00417	1.07195		YOR288C	YOR288C ... MPD1 protein folding protein disulfide isomerase activitvacuole (sensu Fungi) | YOR289W	-0.107734	0.138116	-0.355597	0	0.416026
YOR289W	YOR289W iESR cluster YOR289W biological process unknown molecular function unknown cytoplasm* | YOR290C		yes	yes	-0.418523	0.392215	-1.26708		0.62361		-1.12514	-2.30351		0.717076	-0.0384082		-1.951		2.23181		3.51858	3.70902		0.773039	-0.709191	0.86836			0.00286513	2.09428		0.462407	0.958277	1.24265		-0.473719	-0.897817	1.52155	1.40685	2.24773	1.98945		YOR289W	YOR289W iESR cluster YOR289W biological process unknown molecular function unknown cytoplasm* | YOR290C	0	0	-1.39881	0	1.07883
YOR317W	YOR317W iESR cluster FAA1 lipid metabolism* long-chain-fatty-acid-CoA ligase acmitochondrion* | YOR318C		yes	yes	1.01086	0.902032	1.28091		-0.045417	-0.109993	0.469949	-0.0789216		0.0335493	0.310741	0.593072	-0.152473		0.420843	0.944944	0.488837	0.73523		-0.714992	-0.523836	-0.371393		1.59397	1.22912	1.48843		2.02941	1.45155	1.7278		-0.48595	-0.30729	-0.0548135	-0.0629975	1.2985	1.3768		YOR317W	YOR317W iESR cluster FAA1 lipid metabolism* long-chain-fatty-acid-CoA ligase acmitochondrion* | YOR318C	0.47313	0.693111	0.616863	0	0.737025
YPL004C	YPL004C iESR cluster LSP1 response to heat protein kinase inhibitor activity cytoplasm* | YPL005W		.	yes	-0.663901	-1.02205	-0.821009		-1.222	-1.28816	-0.915819	-1.14424		-0.403046	-0.377693	-0.27886	-0.28908		-0.0121697	0.332958	-0.0181233	0.218157		0.340013	0.323763	0.131395		0.344823	0.647107	0.506144		0.490286	0.396584	0.547919		-0.254911	-0.151465	0.492961	0.255082	0.434165	0.443272		YPL004C	YPL004C iESR cluster LSP1 response to heat protein kinase inhibitor activity cytoplasm* | YPL005W	-0.499751	-0.815306	-0.856396	0	0.499441
YPL067C	YPL067C ... YPL067C biological process unknown molecular function unknown cytoplasm | YPL068C		yes	yes	-0.87538	-0.449269	-0.376667		-1.42078	-1.43192	-0.762567	-0.750729		0.196244	-0.453446	-0.507479	0.244621		1.40173	0.845408	1.05588	0.881666		-0.920974	-0.486799	-0.854106		0.899412	0.1325	0.26831		0.885773	0.396035	0.876106		-0.593458	-0.205939	1.44001	1.58683	0.858338	1.13763		YPL067C	YPL067C ... YPL067C biological process unknown molecular function unknown cytoplasm | YPL068C	-0.816424	-0.867228	-0.955794	0	0.197579
YPL070W	YPL070W ... MUK1 regulation of transcription molecular function unknown cytoplasm | YPL071C		yes	yes	0.35641	0.335876	-0.114606		-0.348376	0.4464	0.835334	-0.6982		-1.04846	0.459091	0.84531	-0.453334		0.556905	0.0760212	0.363306	0.859714		0.0368497	0.194722	-0.0691187		0.739541	1.27047	0.843148		1.21339	1.07406	1.26574		0.280342	0.0419226	1.61843	0.447493	1.27965	1.06713		YPL070W	YPL070W ... MUK1 regulation of transcription molecular function unknown cytoplasm | YPL071C	-0.175786	-0.179742	0.085909	0	0.280537
YPL078C	YPL078C ... ATP4 ATP synthesis coupled proton t structural molecule activity* "proton-transporting ATP synthase, s" | YPL079W		.	yes	-0.855899	-0.631707	-0.677195		-1.51293	-1.39409	-1.04858	-1.8076		-0.952337	-0.30563	-0.464873	-0.30147		0.424455	0.172983	0.15709	0.496318		-0.0824894	-0.0472668	-0.0771007		0.133384	0.730986	0.639071		0.252211	0.393984	0.305738		-0.206271	-0.10311	0.716262	0.341184	0.248574	0.385241		YPL078C	YPL078C ... ATP4 ATP synthesis coupled proton t structural molecule activity* "proton-transporting ATP synthase, s" | YPL079W	-0.622318	-0.434886	-1.0073	0	0.539845
YPL088W	YPL088W ... YPL088W aldehyde metabolism aryl-alcohol dehydrogenase activitycellular component unknown | YPL089C		yes	yes	0.835958	0.720168	0.657273		-0.387617	-0.0575259	0.356249	-0.346032		-0.164869	0.632969	0.554193	0.428744		1.61675	1.39561	1.2508	1.46365		0.403158	0.274194	0.516948		1.03983	1.05364	1.13621		1.12538	0.972442	1.05708		0.163711	0.265189	2.20418	1.58039	1.00709	1.19256		YPL088W	YPL088W ... YPL088W aldehyde metabolism aryl-alcohol dehydrogenase activitycellular component unknown | YPL089C	0.201336	0.061965	0.299207	0	1.40284
YPL089C	YPL089C ... RLM1 cell wall organization and bio DNA binding* nucleus | YPL090C		yes	yes	0.626565	0.19972	0.001074		-0.339864	-0.384168	-0.143145	-0.532683		-0.108895	-0.453446	0.136818	-0.388762		0.664769	0.326034	0.476237	0.799991		0.0130429	-0.0852347	0.0240111		0.335511	0.705058	0.667489		0.528613	0.607566	0.610251		-0.0644873	-0.13226	1.13985	0.838424	0.845627	0.901459		YPL089C	YPL089C ... RLM1 cell wall organization and bio DNA binding* nucleus | YPL090C	0.335557	-0.115498	-0.18689	0	0.917413
YPL110C	YPL110C Ö GDE1 biological process unknown molecular function unknown | Glycerophosphocholine (GroPCho) phosphodiesterase; hydrolyzes GroPCho to choline and glycerolphosphate, for use as a phosphate source and as a precursor for phosphocholine synthesis; may interact with ribosomesYPL111W		yes	yes	0.445984	0.15621	0.208188		0.538218	0.559858	0.561579	-0.543462		-0.40394	0.257048	-0.552567	-0.0978457		0.861319	0.685752	0.926958	1.61265		0.483533	0.418468	0.244699		2.16581	1.84415	1.6028		1.6587	1.73877	1.60187		0.325767	0.248664	1.92102	1.59373	1.20014	1.29002		YPL110C	YPL110C Ö GDE1 biological process unknown molecular function unknown | Glycerophosphocholine (GroPCho) phosphodiesterase; hydrolyzes GroPCho to choline and glycerolphosphate, for use as a phosphate source and as a precursor for phosphocholine synthesis; may interact with ribosomesYPL111W	0.238204	1.16866	1.10861	0	1.74434
YPL154C	YPL154C iESR cluster PEP4 sporulation* endopeptidase activity* mitochondrion* | YPL155C		yes	yes	-0.309523	-0.303152	0.279528		-0.499203	-0.604938	-0.564515	-0.263656		0.465569	0.494233	0.153302	0.44063		1.01952	1.15653	0.949808	1.01015		0.525193	0.229579	0.279506		1.25767	0.722368	0.916083		0.790292	0.819793	0.911165		-0.0874096	-0.108858	1.68184	1.62567	0.865988	0.646946		YPL154C	YPL154C iESR cluster PEP4 sporulation* endopeptidase activity* mitochondrion* | YPL155C	-0.027239	-0.303437	0.077161	0	0.683389
YPL173W	YPL173W ... MRPL40 protein biosynthesis structural constituent of ribosome mitochondrial large ribosomal subun | YPL174C		.	yes	-0.28443	-0.839535	-0.764577		-1.54632	-0.864881	-0.629812	-1.36757		-1.29238	-0.471368	-0.320276	-0.616902		0.0094172	-1.41763	-0.796565	-0.280184		-0.36891	-0.124229	0.216284		-0.46691	0.423055	0.691521		0.309779	0.252858	0.291144		-0.424553	-0.056079	0.096726	-0.622897	0.12777	0.108636		YPL173W	YPL173W ... MRPL40 protein biosynthesis structural constituent of ribosome mitochondrial large ribosomal subun | YPL174C	-0.882416	-0.994146	-1.14042	0	0.096329
YPL214C	YPL214C ... THI6 thiamin biosynthesis hydroxyethylthiazole kinase activitcytoplasm | YPL215W		yes	yes	0.009457	-0.37634	0.198343		-0.0353533	-1.0069	-0.280613	-0.136486		-1.01989	-0.935315	-0.230639	-0.161137		0.0094172	0.446859	0.471349	0.746356		-0.107973	-0.171926	-0.479045		0.729487	0.63836	0.163586		0.644653	0.493447	0.372475		-0.14818	0.10865	0.997104	-0.434451	-0.0497845	0.155804		YPL214C	YPL214C ... THI6 thiamin biosynthesis hydroxyethylthiazole kinase activitcytoplasm | YPL215W	-0.119137	0.098192	0.408417	0	0.311714
YPL215W	YPL215W ... CBP3 protein complex assembly molecular function unknown mitochondrial membrane | YPL216W		.	yes	-0.406709	-1.20514	-0.678564		-1.04882	-0.711444	-0.877676	-1.23998		-0.400761	-0.0715751	-0.878927	-0.178248		0.1387	-0.138104	0.0474651	0.305559		-0.0932239	0.0613268	-0.67507		-0.175876	0.286425	-0.143764		0.129576	0.115246	0.482609		-0.53322	-0.263872	0.558685	0.262885	0.0300512	-0.0716717		YPL215W	YPL215W ... CBP3 protein complex assembly molecular function unknown mitochondrial membrane | YPL216W	-1.35569	-1.10885	-0.949087	0	-0.239112
YPL221W	YPL221W Ö FLC1 (BOP1) DNA replication initiation* chromatin binding* cytoplasm* | Putative FAD transporter; required for uptake of FAD into endoplasmic reticulum; involved in cell wall maintenanceYPL222W		yes	yes	-0.284447	-0.292714	0.056546		-0.346475	-0.319447	-0.608871	-0.214754		0.119694	0.200599	0.143717	0.164049		0.943328	0.82184	0.88966	0.792385		-0.0212294	0.0100723	-0.0081168		0.644271	0.308106	0.252168		0.571504	0.303114	0.314697		-0.0265809	0.0899207	1.83904	2.1246	0.865329	0.826272		YPL221W	YPL221W Ö FLC1 (BOP1) DNA replication initiation* chromatin binding* cytoplasm* | Putative FAD transporter; required for uptake of FAD into endoplasmic reticulum; involved in cell wall maintenanceYPL222W	-0.156731	-0.018061	-0.342683	0	0.779911
YPR004C	YPR004C Ö AIM45 biological process unknown electron carrier activity | Protein with similarity to mammalian electron transfer flavoprotein complex subunit ETF-alpha; interacts with frataxin, Yfh1p; null mutant displays elevated frequency of mitochondrial genome lossYPR005C		.	yes	-0.742359	-0.67561	-0.088298		-0.549262	-0.487798	-0.865416	-0.605877		0.309217	0.355256	-0.151542	0.373351		-0.305888	0.0426406	0.133356	0.249162		0.0201323	-0.0313129	-0.0407352		0.0736788	0.215495	0.0885667		-0.115843	-0.0215452	-0.129747		-0.108845	-0.324545	0.721807	0.580538	0.313525	0.15887		YPR004C	YPR004C Ö AIM45 biological process unknown electron carrier activity | Protein with similarity to mammalian electron transfer flavoprotein complex subunit ETF-alpha; interacts with frataxin, Yfh1p; null mutant displays elevated frequency of mitochondrial genome lossYPR005C	-0.619373	-0.792904	-0.663577	0	0.149578
YPR005C	YPR005C ... HAL1 positive regulation of transcr molecular function unknown cytoplasm | YPR006C		yes	yes	0.820586	0.418094	0.781286		0.301682	-1.10999	-1.00584	-0.981583		0.897648	-0.453446	-0.0662519	-0.835527		0.672382	2.19905	0.9545	0.949684		0.380028	0.254283	-0.105645		-0.00747833	1.4962	1.2012		1.19245	1.77441	1.70208		-0.38061	0.542029	1.22457	1.74389	1.43744	1.97918		YPR005C	YPR005C ... HAL1 positive regulation of transcr molecular function unknown cytoplasm | YPR006C	-0.694207	-1.98107	-2.43025	0	2.36305
YPR047W	YPR047W ... MSF1 protein biosynthesis phenylalanine-tRNA ligase activity mitochondrion | YPR048W		.	yes	0.304205	-0.402614	-0.386065		-1.08688	-0.409554	-0.247393	-0.821927		-0.867887	0.131517	-1.43709	-0.767501		-0.128086	0.144969	-0.425433	0.130256		-0.456473	-0.374552	-0.618448		-0.066372	0.501837	0.470415		0.876951	0.531379	0.613976		0.0668492	-0.251235	0.660438	-1.23701	0.656724	0.620731		YPR047W	YPR047W ... MSF1 protein biosynthesis phenylalanine-tRNA ligase activity mitochondrion | YPR048W	-0.804636	-0.868914	-0.664592	0	0.153143
YPR148C	YPR148C ... YPR148C biological process unknown molecular function unknown cytoplasm | YPR149W		.	yes	0.157302	0.207132	-0.372946		-0.693419	-0.109993	0.0530553	-1.26217		-1.4826	-0.602309	-0.651214	-0.550721		0.316599	-0.541615	-0.0797313	0.624185		-0.272048	0.019092	-0.221415		0.526858	0.933142	1.00157		1.00947	0.910735	1.23486		0.0134681	-0.0265502	1.15122	0.826906	0.741791	0.838863		YPR148C	YPR148C ... YPR148C biological process unknown molecular function unknown cytoplasm | YPR149W	-0.071566	-0.240433	-0.279078	0	0.630074
YPR165W	YPR165W ... RHO1 cell wall organization and bio GTPase activity* mitochondrion* | YPR166C		.	yes	0.058552	0.204516	0.024055		-0.524582	-0.528367	-0.14959	-0.883784		-0.65732	-0.269154	-0.164489	-0.331921		0.244263	0.177984	0.0603787	0.544074		-0.0561165	0.0271184	0.082454		0.668458	0.620414	0.649566		0.505471	0.535711	0.54956		-0.196493	-0.284554	0.90571	0.853271	0.299528	0.154215		YPR165W	YPR165W ... RHO1 cell wall organization and bio GTPase activity* mitochondrion* | YPR166C	-0.549124	-0.440349	-0.240322	0	-0.189625
YPR183W	YPR183W ... DPM1 N-linked glycosylation* "transferase activity, transferring"mitochondrion* | YPR184W		.	yes	-0.049019	0.107638	0.618362		-0.0836882	-0.022359	-0.0655827	0.1706		0.507011	0.400476	-0.0847878	0.297303		0.596506	0.416284	0.349803	0.209718		0.0443502	-0.145095	0.0682307		-0.323424	-0.188561	0.0402037		-0.0281448	-0.00760118	0.104175		-0.113063	0.00679308	1.04981	1.09224	0.119239	0.0300131		YPR183W	YPR183W ... DPM1 N-linked glycosylation* "transferase activity, transferring"mitochondrion* | YPR184W	-0.062565	0.104117	0.106861	0	-0.092841
YPR191W	YPR191W ... QCR2 aerobic respiration* ubiquinol-cytochrome-c reductase acmitochondrion* | YPR192W		.	yes	-0.607907	-1.13279	-0.621374		-1.30259	-1.27677	-1.04099	-1.23755		-0.470661	-0.373786	-0.0180773	-0.35169		0.230741	0.274521	0.0729325	0.138213		-0.415644	-0.280571	-0.368679		0.446828	0.298521	0.227668		0.142871	0.0353643	-0.132245		-0.448887	-0.270686	0.37115	0.291374	0.210004	0.165598		YPR191W	YPR191W ... QCR2 aerobic respiration* ubiquinol-cytochrome-c reductase acmitochondrion* | YPR192W	-0.840244	-1.03352	-1.1159	0	0.27079
YFR053C	YFR053C iESR cluster HXK1 glucose metabolism* hexokinase activity cytosol | YFR054C		yes		-0.888008	-2.54324	-1.95896		-2.58026	-2.46755	-1.95521	-1.30024		0.22941	0.534777	0.332297	1.80291		4.08471	4.4	4.96014	4.48909		2.13005	0.689358	-0.0963067		5.9698	3.94628	4.03507		4.61236	3.75055	4.71633		-0.968581	-0.201123	-1.95114	-1.56138	0.935727	1.02238		YFR053C	YFR053C iESR cluster HXK1 glucose metabolism* hexokinase activity cytosol | YFR054C	0.600313	0.664717	0.45403	0	0.101091
YDR380W	YDR380W iESR cluster ARO10 leucine catabolism* pyruvate decarboxylase activity* cytoplasm | YDR381C-A		yes		-0.836478	-0.474248	-0.55599		-0.283281	-0.898489	-0.342235	-0.191302		-0.0198899	-1.11641		-0.186718		2.84231	2.38598	3.51632	2.50865		0.296972	0.31187	-0.198754		3.3689	3.94458	3.49713		3.17126	3.35755	3.52221		0.260778	-0.0682189	1.24497	0.746506	0.395924	0.144556		YDR380W	YDR380W iESR cluster ARO10 leucine catabolism* pyruvate decarboxylase activity* cytoplasm | YDR381C-A	#N/A	#N/A	#N/A	#N/A	#N/A
YLR142W	YLR142W iESR cluster PUT1 glutamate biosynthesis* proline dehydrogenase activity mitochondrion | YLR143W		yes		1.54495	0.726216	0.781286		0.301682	0.153041	0.970787	0.586306		-0.604852	0.224626	2.14787	0.35385		2.55374	2.48284	2.71123	2.56929		0.742096	-0.0246931	-0.056735		1.84879	2.02255	2.41544		2.56859	2.90383	3.19428		-0.60617	-0.580267	-0.248427	-0.303643	0.802814	0.720951		YLR142W	YLR142W iESR cluster PUT1 glutamate biosynthesis* proline dehydrogenase activity mitochondrion | YLR143W	#N/A	#N/A	#N/A	#N/A	#N/A
YER037W	YER037W iESR cluster PHM8 biological process unknown molecular function unknown cytoplasm* | YER038C		yes		0.490504	1.21164	-0.277131		-0.961353		0.0447876	-1.13359		0.717076	0.28352		0.633958		3.46885		3.26143	3.62525		0.242525	-0.709191	1.99389		3.89941	3.91714	5.70672		4.58168	6.10123	5.25902		0.57151	0.270575	0.619245	-0.345065	0.852502	0.664674		YER037W	YER037W iESR cluster PHM8 biological process unknown molecular function unknown cytoplasm* | YER038C	#N/A	#N/A	#N/A	#N/A	#N/A
YLR327C	YLR327C Ö iESR cluster TMA10 (RBF9) biological process unknown molecular function unknown nucleus | Protein of unknown function that associates with ribosomesYLR328W		yes		2.86688	3.21164	3.01832		1.03865	-0.109993	0.0447876	1.96327		0.132113			1.44131		4.29482	4.54585	6.19849	4.0474		0.34944	0.875771	-0.113024		2.5209	3.15417	2.69501		3.50844	3.26409	3.73583		-1.23556	-0.394615	1.57724	1.75477	2.50274	2.32195		YLR327C	YLR327C Ö iESR cluster TMA10 (RBF9) biological process unknown molecular function unknown nucleus | Protein of unknown function that associates with ribosomesYLR328W	#N/A	#N/A	#N/A	#N/A	#N/A
YPR160W	YPR160W ... GPH1 glycogen catabolism glycogen phosphorylase activity cytoplasm | YPR161C		yes		0.834458	-1.11028	-0.069137		-0.183745	-3.63356	-0.135785	-0.975324		1.32476	-0.0384082		1.26353		3.51192	5.9043	4.37202	5.02488		3.04988	0.757127	-1.25987		6.93504	2.74798	2.94942		4.89938	3.38699	5.12775		-0.521548	0.0199936	1.22457	1.08192	2.92893	2.74595		YPR160W	YPR160W ... GPH1 glycogen catabolism glycogen phosphorylase activity cytoplasm | YPR161C	-0.638403	-0.530221	-0.65926	0	0.25424
YDR216W	YDR216W ... ADR1 transcription* transcription factor activity nucleus | YDR217C		yes		-0.757424	-0.58842	-0.184515		-1.58938	-1.30264	-1.0175	-1.5121		0.688507	0.892329	0.127409	0.425372		2.67927	2.62302	2.53751	2.59354		1.29315	1.72126	0.460459		2.67702	3.23612	2.57248		2.56737	2.10777	2.73955		0.471833	0.452493	2.31939	1.78316	2.37614	2.0699		YDR216W	YDR216W ... ADR1 transcription* transcription factor activity nucleus | YDR217C	-0.779915	-0.405237	-0.669221	0	-1.43602
YOR374W	YOR374W iESR cluster ALD4 ethanol metabolism aldehyde dehydrogenase (NAD) activimitochondrion* | YOR375C		yes		-1.17328	-1.37602	-0.718773		-1.68604	-2.27397	-1.87688	-1.51367		1.21827	0.859712	1.55981	1.13074		1.5614	2.09052	2.02475	1.61702		1.10148	0.939902	-0.117754		3.18118	2.18818	1.80142		2.39197	1.90576	2.40104		-0.594629	-0.0512798	-0.18708	-0.58072	2.70361	2.62286		YOR374W	YOR374W iESR cluster ALD4 ethanol metabolism aldehyde dehydrogenase (NAD) activimitochondrion* | YOR375C	-0.401414	-0.521872	-0.540982	0	0.815044
YEL011W	YEL011W iESR cluster GLC3 glycogen metabolism "1,4-alpha-glucan branching enzyme a"cytoplasm | YEL012W		yes		-0.065547	-0.434073	0.48583		-0.266207	-2.06419	-0.813193	-0.724781		1.23165	0.329324	0.419175	1.26516		2.15077	3.43037	2.5112	2.7244		0.442823	0.435199	0.300552		2.04526	1.7584	2.22273		2.09667	1.7819	2.0981		-0.573255	0.138905	0.476242	0.510687	1.58852	1.50106		YEL011W	YEL011W iESR cluster GLC3 glycogen metabolism "1,4-alpha-glucan branching enzyme a"cytoplasm | YEL012W	-0.536007	-0.655727	-0.60858	0	0.27182
YOR178C	YOR178C ... GAC1 meiosis* protein phosphatase type 1 activityprotein phosphatase type 1 complex | YOR179C		yes		1.28192	0.69707	0.8484					0.35184			0.546554		1.34178		3.70986			2.18915		0.657562	0.0981636	-0.00610888		2.31445	1.88739	2.88569		3.69628	3.15092	3.97892		-1.71076	1.19261	0.966769	1.87634	4.56859	5.25946		YOR178C	YOR178C ... GAC1 meiosis* protein phosphatase type 1 activityprotein phosphatase type 1 complex | YOR179C	#N/A	#N/A	#N/A	#N/A	#N/A
YOR134W	YOR134W ... BAG7 small GTPase mediated signal t signal transducer activity* intracellular | YOR135C		yes		0.696954	0.211643	-1.47353			-0.109993	0.0447876	0.0888058			-0.0384082	4.4698	-1.72861			3.84541	5.26143	4.10169		1.24252	-0.124229	1.57885		5.48437	4.79428	4.22673		4.49988	5.51627	3.6646		0.578748	0.450106	3.1421	2.40685	4.68693	5.05529		YOR134W	YOR134W ... BAG7 small GTPase mediated signal t signal transducer activity* intracellular | YOR135C	#N/A	#N/A	#N/A	#N/A	#N/A
YGR032W	YGR032W ... GSC2 cell wall organization and bio "1,3-beta-glucan synthase activity"prospore membrane* | YGR033C		yes		-0.156079	-0.027022	0.415127		-0.265793	-0.0713128	-0.0825065	0.302163		0.285523	0.386397	0.375399	0.46947		2.6883	2.93302	2.6129	2.85515		0.920875	0.774076	1.13536		1.97741	1.50143	1.8855		2.11316	1.98622	2.0125		1.37626	1.41877	2.8238	2.99994	2.39477	2.31958		YGR032W	YGR032W ... GSC2 cell wall organization and bio "1,3-beta-glucan synthase activity"prospore membrane* | YGR033C	-0.597863	0.154187	0.532164	0	-1.1113
YKL163W	YKL163W ... PIR3 cell wall organization and bio structural constituent of cell wallcell wall (sensu Fungi) | YKL164C		yes		-0.336994	-0.042113	0.24268		-1.96135	-0.846959	0.0447876	-0.911194		0.302038	1.22463	3.27716	2.76324		5.79078	5.18328	5.67206	6.62329		1.41245	1.87577	0.993891		6.85361	4.22129	5.60329		4.12003	2.67912	4.48276		-0.0586817	-0.0961756	3.16088	3.86057	4.73934	4.8363		YKL163W	YKL163W ... PIR3 cell wall organization and bio structural constituent of cell wallcell wall (sensu Fungi) | YKL164C	#N/A	#N/A	#N/A	#N/A	#N/A
YLL039C	YLL039C iESR cluster UBI4 response to stress* protein tag* cytoplasm | YLL040C		yes		0.914185	0.958402	0.580705		-0.0284669	0.754352	0.841254	0.745219		-0.297571	0.558833	-0.363089	0.109799		2.11429	1.82494	1.86697	1.86998		0.366353	0.79915	0.350585		1.72608	1.85723	1.76846		1.71601	1.47623	1.9982		0.379905	0.521941	1.14858	1.04155	1.29499	1.42965		YLL039C	YLL039C iESR cluster UBI4 response to stress* protein tag* cytoplasm | YLL040C	#N/A	#N/A	#N/A	#N/A	#N/A
YDL130W-A	YDL130W-A ... STF1 ATP synthesis coupled proton t molecular function unknown proton-transporting ATP synthase co | YDL131W		yes		-0.534776	0.519766	-0.520834		-1.18375		-2.41464	-2.61163		-0.0902793	-0.301443		-1.10712		1.00942		3.65876	2.494		-1.25998	0.653379	-0.743074		-0.188051	2.24996	2.11631		3.26069	2.24778	3.37087		0.195891	0.337632	0.783994	0.0849227	1.07883	1.58326		YDL130W-A	YDL130W-A ... STF1 ATP synthesis coupled proton t molecular function unknown proton-transporting ATP synthase co | YDL131W	0.38251	-1.66261	0.856508	0	2.07914
YLR149C	YLR149C iESR cluster YLR149C biological process unknown molecular function unknown cellular component unknown | YLR149C-A		yes		0.544951	0.899699	0.404794		-1.37639	-2.69496	0.407358	-0.548624		-1.86789	-0.623371		0.370924		3.23181	5.34791	3.42045	3.63567		0.242525	1.61274	0.615379		2.13388	2.38989	2.18525		2.41242	2.08113	2.30907		-0.116785	-0.0634949	1.10592	1.17078	1.89232	1.81808		YLR149C	YLR149C iESR cluster YLR149C biological process unknown molecular function unknown cellular component unknown | YLR149C-A	1.34432	0.118102	0.143328	0	0.258312
YLR258W	YLR258W iESR cluster GSY2 glycogen metabolism glycogen (starch) synthase activitycytoplasm | YLR259C		yes		1.65229	1.37829	1.30393		-0.298388	0.0599317	0.696864	0.673768		0.591545	1.42102	0.0774836	1.37092		2.11904	2.64511	2.40251	2.57356		0.97949	0.406286	0.283398		2.60396	1.39392	2.02482		1.78062	1.49973	2.152		-0.40479	-0.082641	-0.150273	-0.406466	1.52719	1.39452		YLR258W	YLR258W iESR cluster GSY2 glycogen metabolism glycogen (starch) synthase activitycytoplasm | YLR259C	0.01643	-0.038298	0.282826	0	-0.082011
YDR516C	YDR516C iESR cluster EMI2 sporulation (sensu Fungi) molecular function unknown cytoplasm | YDR517W		yes		-1.01693	-1.36404	-1.14063		-2.08334	-1.17412	-0.627158	-0.613289		-0.0549724	0.647483	0.500175	0.788606		2.55131	2.40093	1.9696	1.91977		0.375791	0.375845	0.0962528		2.40465	1.34307	1.56377		1.78746	1.48092	1.98174		-0.741946	-0.194328	-0.699706	-0.615517	0.173876	0.321389		YDR516C	YDR516C iESR cluster EMI2 sporulation (sensu Fungi) molecular function unknown cytoplasm | YDR517W	-0.19389	0.36922	0.709448	0	-0.288914
YML128C	YML128C iESR cluster MSC1 meiotic recombination molecular function unknown mitochondrion* | YML129C		yes		0.061272	-0.169447	-0.604112		-0.0868836	-1.02753	-0.263335	-1.46374		-0.282924	-0.425431		-0.245529		2.45688	3.28035	3.02726	3.96958		0.0257133	0.963234	-0.470056		0.05811	1.64228	0.722964		1.95339	1.83017	1.83016		-0.46877	-0.36769	2.0204	1.22997	2.12836	1.62924		YML128C	YML128C iESR cluster MSC1 meiotic recombination molecular function unknown mitochondrion* | YML129C	-0.829828	-1.33442	-2.23515	0	1.05264
YMR196W	YMR196W iESR cluster YMR196W biological process unknown molecular function unknown cytoplasm | YMR197C		yes		0.116958	0.134476	0.145017		0.199112	1.13793	0.307822	-0.21285		-0.25491	1.66203	-0.43709	0.357249		1.15381	1.01252	0.903874	1.62671		0.380028	0.216808	0.038979		1.35509	1.17032	1.36785		2.14798	2.05612	2.31019		0.0683575	0.425422	0.92955	1.35438	2.24968	2.40985		YMR196W	YMR196W iESR cluster YMR196W biological process unknown molecular function unknown cytoplasm | YMR197C	-0.839904	-1.19995	-1.58115	0	0.283359
YKR061W	YKR061W ... KTR2 N-linked glycosylation* mannosyltransferase activity Golgi apparatus | YKR062W		yes		0.932508	0.982161	0.929019		0.26104	0.557431	0.257332	-0.432026		-0.0378118	-0.125871	0.299876	0.271388		1.42445	1.09052	0.903874	2.04573		0.460705	0.361198	0.0870005		1.45463	1.51032	1.2485		1.36743	1.52119	1.78736		-0.0741118	-0.053062	1.23679	0.374429	1.96699	1.78011		YKR061W	YKR061W ... KTR2 N-linked glycosylation* mannosyltransferase activity Golgi apparatus | YKR062W	#N/A	#N/A	#N/A	#N/A	#N/A
YOR208W	YOR208W ... PTP2 protein amino acid dephosphory protein tyrosine phosphatase activinucleus | YOR209C		yes		0.305633	0.569033	0.639391		-0.0644462	0.163025	-0.465828	-0.466713		0.444057	0.421023	-1.23064	0.101928		1.11251	1.1029	1.40055	1.60804		0.0561116	0.148024	-0.437448		0.925407	1.01984	0.966594		1.1738	1.26192	1.56827		-0.07096	0.0405234	0.887275	0.8054	2.40489	2.64491		YOR208W	YOR208W ... PTP2 protein amino acid dephosphory protein tyrosine phosphatase activinucleus | YOR209C	#N/A	#N/A	#N/A	#N/A	#N/A
YOR185C	YOR185C iESR cluster GSP2 nuclear organization and bioge GTPase activity nucleus | YOR186W		yes		-0.805546	-1.37332	-0.580443		-1.18375	-1.01688	-1.74663	-1.40869		-0.938276	-0.360336	-0.43709	-0.0281722		0.746383	1.26045	2.2909	2.1991		0.0905216	0.576211	0.256926		2.89941	2.88739	2.28137		3.77842	2.74612	2.5999		0.130796	0.174133	1.0641	0.299936	2.87847	2.46277		YOR185C	YOR185C iESR cluster GSP2 nuclear organization and bioge GTPase activity nucleus | YOR186W	-1.04817	-0.864894	-1.19433	0	0.198197
YJR078W	YJR078W ... BNA2 NAD biosynthesis "tryptophan 2,3-dioxygenase activity"cytoplasm | YJR079W		yes		0.223023	-0.466428	0.333827		-1.28328	-1.10999		-2.23312		-1.18981			-0.880615		3.65327	4.16734		5.61739		-0.56483	0.653379	0.408929		2.67702	0.887388	2.64177		3.46951	1.15759	3.28704		0.356356	0.571122	3.63444	3.44247	0.234669	-0.416744		YJR078W	YJR078W ... BNA2 NAD biosynthesis "tryptophan 2,3-dioxygenase activity"cytoplasm | YJR079W	#N/A	#N/A	#N/A	#N/A	#N/A
YFR015C	YFR015C ... GSY1 glycogen metabolism glycogen (starch) synthase activitycytoplasm* | YFR016C		yes		-0.295268	-0.581906	-0.264075		-1.69832	-2.19746	-0.829681	-1.61163		0.132113	-0.0384082	1.3323	0.453591		1.23181	1.96089	2.0738	2.40547		0.953018	1.09816	1.274		1.76191	2.27205	2.5113		2.04877	1.49407	1.96946		-0.661611	0.0350689	-1.29614	-0.837456	0.58402	0.530407		YFR015C	YFR015C ... GSY1 glycogen metabolism glycogen (starch) synthase activitycytoplasm* | YFR016C	-0.326698	-0.384036	0.056082	0	-0.633559
YGR008C	YGR008C iESR cluster STF2 ATP synthesis coupled proton t molecular function unknown proton-transporting ATP synthase co | YGR009C		yes		-1.62497	-1.98999	-1.1516		-1.28328		-1.27714	-2.11283		-0.189815	-0.360336		0.239679		1.33135		2.67646	3.29546		-0.427327	0.637611	-0.836184		1.35509	1.19672	1.30073		2.9067	1.9208	3.16263		-0.567695	0.161702	0.517614	0.808591	0.673263	1.20196		YGR008C	YGR008C iESR cluster STF2 ATP synthesis coupled proton t molecular function unknown proton-transporting ATP synthase co | YGR009C	0.62863	0	-1.60172	0	-0.80235
YHL021C	YHL021C Ö iESR cluster AIM17 biological process unknown molecular function unknown mitochondrion | Putative protein of unknown function; the authentic, non-tagged protein is detected in highly purified mitochondria in high-throughput studies; null mutant displays reduced frequency of mitochondrial genome lossYHL022C		yes		-0.563573	-0.436645	-0.165813		-0.323923	-0.97249	-0.682194	-0.634354		0.42162	-0.552981	-0.115161	-0.185878		2.15626	2.27675	2.14393	2.2868		1.41678	1.38166	1.02824		0.689959	0.134303	0.669853		1.55358	1.06207	1.36374		0.741549	0.97077	0.929337	0.876336	1.99233	2.14268		YHL021C	YHL021C Ö iESR cluster AIM17 biological process unknown molecular function unknown mitochondrion | Putative protein of unknown function; the authentic, non-tagged protein is detected in highly purified mitochondria in high-throughput studies; null mutant displays reduced frequency of mitochondrial genome lossYHL022C	0.214501	0.223539	0.481012	0	-0.006568
YOR347C	YOR347C ... PYK2 glycolysis* pyruvate kinase activity cytosol | YOR348C		yes		-0.396155	-0.525323	0.01441		-0.607716	-0.59542	-1.08232	-1.01273		0.576898	1.15424	0.679724	0.596115		1.39275	1.28901	1.59846	1.76702		0.294055	0.246609	0.0666475		1.57748	1.36032	1.39695		1.76853	1.43605	1.48029		-0.105987	0.127263	-0.0425686	0.276652	2.01037	1.72608		YOR347C	YOR347C ... PYK2 glycolysis* pyruvate kinase activity cytosol | YOR348C	0	-0.716786	-0.624358	0	0.358849
YBL049W	YBL049W iESR cluster MOH1 biological process unknown molecular function unknown cellular component unknown | YBL050W		yes				0.433363				0.62975	-1.49616			-0.0384082		-0.728612				2.96277	4.44154		1.24252	-1.70919	-2.00611		3.89941	1.10978	0.300731		3.23685	4.24778	4.39395		0.718926	-0.495446	3.24503	1.29137	2.99247	2.78971		YBL049W	YBL049W iESR cluster MOH1 biological process unknown molecular function unknown cellular component unknown | YBL050W	#N/A	#N/A	#N/A	#N/A	#N/A
YBR093C	YBR093C ... PHO5 phosphate metabolism* acid phosphatase activity cell wall (sensu Fungi)* | YBR094W		yes		-0.533826	-0.13628	0.531927		-2.03174	-1.63356	-1.54017	-0.854611		1.38365	0.392226	1.38734	1.20118		2.73188	2.43037	1.93362	1.84419		0.311237	0.390344	0.53446		2.62932	0.517438	0.786158		2.29601	1.14825	1.34149		-0.0693707	-0.195258	-0.789914	-0.996999	-1.03135	-1.03993		YBR093C	YBR093C ... PHO5 phosphate metabolism* acid phosphatase activity cell wall (sensu Fungi)* | YBR094W	4.10652	2.35298	0.734308	0	2.08472
YOR120W	YOR120W ... GCY1 response to salt stress* aldo-keto reductase activity cytoplasm* | YOR121C		yes		0.259549	-0.30293	0.177023		0.569162	-0.431921	0.841254	-0.289706		-0.715884	0.0990953	1.80684	-0.259127		1.11633	2.34791	1.28574	2.47325		0.515543	-0.355554	-0.121586		1.31445	0.860421	0.863326		1.70079	1.96523	1.89241		-0.130472	0.11017	0.683744	0.765745	2.8613	2.84361		YOR120W	YOR120W ... GCY1 response to salt stress* aldo-keto reductase activity cytoplasm* | YOR121C	-0.844025	-1.34436	-1.31211	0	0.511446
YNR034W-A	YNR034W-A ... YNR034W-A biological process unknown molecular function unknown cytoplasm | YNR035C		yes								1.04479	-0.911194					-0.143649				5.60431	7.12128			1.46073				3.58783	1.56377		2.97381	1.78835			-0.97622	-0.505499	1.4876	1.31374	2.44466	1.70165		YNR034W-A	YNR034W-A ... YNR034W-A biological process unknown molecular function unknown cytoplasm | YNR035C	-0.56444	-0.782966	-0.838398	0	-0.238751
YJL052W	YJL052W ... TDH1 glycolysis* glyceraldehyde-3-phosphate dehydrogcytosol* | YJL053W		yes		0.019286	0.01338	0.583886		0.386571	-1.01688	0.707753	0.574233		0.132113	-0.775374	1.20677	0.166691		2.69392	3.93287	3.34943	3.43081		0.827487	0.460734	-1.04006		2.89941	-0.0560286	0.359893		3.42095	0.57076	1.94917		-0.105375	0.195177	3.07664	3.84207	2.34217	2.02124		YJL052W	YJL052W ... TDH1 glycolysis* glyceraldehyde-3-phosphate dehydrogcytosol* | YJL053W	-0.031979	-0.217973	-0.528432	0	-0.149936
YIL101C	YIL101C iESR cluster XBP1 response to stress transcription factor activity nucleus | YIL102C		yes		0.959989		-1.1516		0.0386473		-1.54017	-0.496157		2.45404			2.07874		3.70986		5.26143	4.73104		1.82749	0.875771			4.89941	3.47235			2.49988	2.95828	4.75652		1.65181	1.87834	3.59295	2.71171	3.82914	3.44016		YIL101C	YIL101C iESR cluster XBP1 response to stress transcription factor activity nucleus | YIL102C	#N/A	#N/A	#N/A	#N/A	#N/A
YPL272C	YPL272C ... YPL272C biological process unknown molecular function unknown cellular component unknown | YPL273W		yes		-0.704409	-0.263265	0.231729		-0.961353	-1.27992	-0.0166129	-0.993656		-1.28292	-2.62337	-0.115161	-0.669718		2.00942	1.0678	1.72016	2.28569		0.505559	0.875771	0.645968		2.57748	2.42344	2.12564		3.72227	2.4437	2.54221		0.159498	-0.317233	1.04282	0.0849227	0.400842	0.583256		YPL272C	YPL272C ... YPL272C biological process unknown molecular function unknown cellular component unknown | YPL273W	#N/A	#N/A	#N/A	#N/A	#N/A
YNL200C	YNL200C iESR cluster YNL200C biological process unknown molecular function unknown cytoplasm* | YNL201C		yes		-0.537511	-0.705895	-0.386065		-1.96135	-0.431921	-1.38406	-0.162733		0.454041	0.0990953	-1.65948	0.460422		2.74638	1.26045	1.90387	1.59811		0.827487	0.698893	0.163816		1.67702	1.61321	1.59351		1.67235	1.77258	2.00164		-0.318068	-0.249384	0.517721	-0.99308	1.081	1.02109		YNL200C	YNL200C iESR cluster YNL200C biological process unknown molecular function unknown cytoplasm* | YNL201C	-0.873243	-0.941524	-1.66796	0	0.793192
YKR076W	YKR076W iESR cluster ECM4 cell wall organization and bio molecular function unknown cytoplasm | YKR077W		yes		0.783111	0.211643	0.433362		0.453685	-1.10999	0.0447876	-0.152202		-0.452849	0.768947	0.662446	0.0628015		1.59438	2.71988	2.55595	1.92766		0.593997	0.821323	0.51996		2.94832	2.55035	2.53462		2.46035	1.8561	2.55281		0.113499	0.121781	0.840355	0.756597	1.98128	1.43885		YKR076W	YKR076W iESR cluster ECM4 cell wall organization and bio molecular function unknown cytoplasm | YKR077W	-1.45348	-1.29087	-1.92866	0	0.44792
YJL164C	YJL164C iESR cluster TPK1 protein amino acid phosphoryla protein serine/threonine kinase actcytoplasm* | YJL165C		yes		0.208668	-0.493614	-0.340362		-0.661792	-0.290566	0.078735	-1.03673		-2.2464	-0.0384082	0.399412	-0.104121		0.916308	0.812987	0.687063	1.60804		-0.354716	0.446087	-0.254036		-0.398268	1.62435	1.06478		1.9424	1.46826	1.63584		-0.38061	-0.382052	1.04014	0.725027	0.769455	0.853994		YJL164C	YJL164C iESR cluster TPK1 protein amino acid phosphoryla protein serine/threonine kinase actcytoplasm* | YJL165C	#N/A	#N/A	#N/A	#N/A	#N/A
YBR169C	YBR169C iESR cluster SSE2 protein folding molecular function unknown cytoplasm | YBR170C		yes		0.09429	0.431424	0.095315		-0.202361	-1.10999	-0.289631	-0.804279		-0.760972	-0.816016	0.196783	-0.674164		1.9423	2.88494	2.57014	2.54226		0.113791	0.0277743	-0.206806		0.863788	0.635001	0.8413		1.27856	1.22724	1.5054		0.14441	0.178264	1.39524	1.0043	1.52789	1.50525		YBR169C	YBR169C iESR cluster SSE2 protein folding molecular function unknown cytoplasm | YBR170C	-0.26283	-0.658379	0.007316	0	0.650112
YPR184W	YPR184W iESR cluster GDB1 glycogen catabolism 4-alpha-glucanotransferase activitycytoplasm* | YPR185W		yes		0.329445	0.936189	0.807758		-0.0102623	-0.0263354	0.268828	0.523209		0.179419	-0.432072	-0.495983	0.281103		1.47336	1.17679	1.58441	1.57677		0.735041	0.729382	0.401067		1.36336	0.967387	0.734465		1.09736	1.10185	1.10432		0.0741172	0.13321	1.52681	1.32386	1.56701	1.36526		YPR184W	YPR184W iESR cluster GDB1 glycogen catabolism 4-alpha-glucanotransferase activitycytoplasm* | YPR185W	-0.456142	-0.782564	-0.877477	0	0.197997
YMR105C	YMR105C iESR cluster PGM2 glucose 1-phosphate utilizatio phosphoglucomutase activity cytosol | YMR105W-A		yes		-0.365412	-0.750882	-0.325629		-0.961353	-0.624566	-0.314755	-0.120648		-0.557547	0.302629	0.189693	0.401785		2.18574	2.62302	2.51134	2.64955		-0.0239903	0.723768	0.414734		1.43126	0.686475	0.90725		1.65814	1.11028	1.21905		-0.616844	-0.153003	0.357692	0.49996	1.1914	1.16258		YMR105C	YMR105C iESR cluster PGM2 glucose 1-phosphate utilizatio phosphoglucomutase activity cytosol | YMR105W-A	-0.536175	-0.508956	-0.277136	0	0.201036
YJR073C	YJR073C ... OPI3 phosphatidylcholine biosynthes phosphatidyl-N-methylethanolamine Nmitochondrion* | YJR074W		yes		-0.650736	-0.623546	0.126701		-1.02025	-0.887601	-0.666707	-0.122698		1.1887	0.340103	1.24373	1.3924		2.52249	1.8316	1.95699	1.95914		-0.540664	-0.698923	-1.10232		2.3904	1.40196	1.71111		2.22336	1.69319	2.48351		-0.937375	-0.549894	1.34354	2.48162	0.136858	0.0274803		YJR073C	YJR073C ... OPI3 phosphatidylcholine biosynthes phosphatidyl-N-methylethanolamine Nmitochondrion* | YJR074W	#N/A	#N/A	#N/A	#N/A	#N/A
YGR256W	YGR256W iESR cluster GND2 glucose metabolism phosphogluconate dehydrogenase (deccytosol | YGR257C		yes		0.474562	1.12918	0.400941		1.03865	0.890007	0.892785	0.896161		1.13211			1.17828		4.17934	3.21464	3.8735	4.00858		0.0905216	1.29081	0.479318		2.89941	1.62435	1.74434		2.10255	1.48879	2.23868		0.803815	0.581037	1.76514	1.15531	1.38619	0.99068		YGR256W	YGR256W iESR cluster GND2 glucose metabolism phosphogluconate dehydrogenase (deccytosol | YGR257C	-1.19048	-2.1257	-2.91787	0	0.635506
YOL082W	YOL082W iESR cluster ATG19 protein-vacuolar targeting protein binding cytoplasm* | YOL083W		yes		0.152634	-0.148946	-0.26864		-1.04882	-1.52503	-0.0583058	-1.51386		-0.633422	-0.0384082	0.196783	-1.14365		1.40173	1.99741	1.21508	1.89755		0.12223	0.366758	0.0527848		0.577484	0.84786	1.06627		1.75768	1.22746	1.21576		-0.27153	0.115559	0.0308272	-0.353962	1.1573	1.50624		YOL082W	YOL082W iESR cluster ATG19 protein-vacuolar targeting protein binding cytoplasm* | YOL083W	#N/A	#N/A	#N/A	#N/A	#N/A
YOL052C-A	YOL052C-A ... DDR2 response to stress molecular function unknown cytoplasm* | YOL053W		yes								-2.76257	-3.81808		-1.45285	-1.77537		-1.05054				6.78652	7.24124								1.78616		2.72227				-1.19619	0.0350689	3.08706	2.18446	3.94078	3.71099		YOL052C-A	YOL052C-A ... DDR2 response to stress molecular function unknown cytoplasm* | YOL053W	#N/A	#N/A	#N/A	#N/A	#N/A
YMR251W-A	YMR251W-A iESR cluster HOR7 response to stress molecular function unknown endoplasmic reticulum* | YMR252C		yes		-0.526433	-0.913887	-0.385009		-1.74894	-1.85542	-1.02921	-1.26954		-0.981707	-0.445033	-0.572019	-0.173573		1.3036	1.95434	1.08221	1.57973		0.800006	0.59113	0.340623		1.44451	0.590824	0.768177		0.927197	0.995396	1.09679		0.130909	0.136291	0.897748	1.43903	0.730048	0.599154		YMR251W-A	YMR251W-A iESR cluster HOR7 response to stress molecular function unknown endoplasmic reticulum* | YMR252C	#N/A	#N/A	#N/A	#N/A	#N/A
YOL153C	YOL153C		yes						-1.63942	-1.77296	-1.29308	-1.51454		0.558378	-0.0768823	-0.0379936	0.742394		1.59438	1.48284	1.27311	1.72768		0.0498796	0.0362359	-0.923647		2.70677	1.50036	2.08116		2.31702	1.89798	3.00164		-0.544109	-0.772286	-0.241751	0.184458	2.27349	2.22928		YOL153C	YOL153C	-1.04178	-1.06479	-1.16586	0	-0.723104
YDL021W	YDL021W iESR cluster GPM2 biological process unknown molecular function unknown* cytoplasm* | YDL022W		yes		0.959989	1.59015	1.8484				0.62975	-1.23312					-0.880615		0.0094172		1.12627	2.68665		1.24252	0.875771	0.730857		3.89941	2.20932	2.71577		3.82181	3.07375	2.80899		0.240879	0.978485	2.26829	1.29137	1.84563	2.34913		YDL021W	YDL021W iESR cluster GPM2 biological process unknown molecular function unknown* cytoplasm* | YDL022W	-0.272442	-0.033881	-0.339911	0	0.049868
YGR070W	YGR070W ... ROM1 cell wall organization and bio signal transducer activity* intracellular | YGR071C		yes		0.437036	0.424304	0.562998		-0.546315	0.890007	0.399883	-0.214586		-1.45285	0.868482		-0.246743		0.304873	1.0678	0.780726	1.19815		-0.000331818	0.478436	0.448457		-0.250335	0.887388	0.9921		1.45097	1.2317	1.36961		0.167291	0.291131	0.660775	0.465267	0.94558	1.49828		YGR070W	YGR070W ... ROM1 cell wall organization and bio signal transducer activity* intracellular | YGR071C	#N/A	#N/A	#N/A	#N/A	#N/A
YJL057C	YJL057C Ö iESR cluster IKS1 biological process unknown molecular function unknown | Putative serine/threonine kinase; expression is induced during mild heat stress; deletion mutants are hypersensitive to copper sulphate and resistant to sorbate; interacts with an N-terminal fragment of Sst2pYJL058C		yes		0.40003	0.000139	0.083356		0.62361	-0.820487	-0.135785	-0.818085		-0.505317	-0.886405		-0.624275		0.475081	1.75521	1.53614	1.68665		0.13359	0.471381	0.465197		-1.88195	1.17689	1.38974		1.25372	1.03181	1.26072		0.15891	-0.221271	2.05002	1.62444	0.837214	0.722845		YJL057C	YJL057C Ö iESR cluster IKS1 biological process unknown molecular function unknown | Putative serine/threonine kinase; expression is induced during mild heat stress; deletion mutants are hypersensitive to copper sulphate and resistant to sorbate; interacts with an N-terminal fragment of Sst2pYJL058C	#N/A	#N/A	#N/A	#N/A	#N/A
YLR121C	YLR121C ... YPS3 protein metabolism aspartic-type endopeptidase activitplasma membrane | YLR122C		yes		2.24321	2.35584	2.70015		0.676077	0.986868	0.70892	1.09646		1.04965	1.47817	1.14787	1.20263		2.49974	2.78482	2.53705	2.66647		0.613973	0.58915	0.692383		1.62257	1.66662	1.96928		1.33768	1.11345	1.359		0.0824944	0.122845	1.88056	2.21344	1.93071	1.87088		YLR121C	YLR121C ... YPS3 protein metabolism aspartic-type endopeptidase activitplasma membrane | YLR122C	#N/A	#N/A	#N/A	#N/A	#N/A
YDL024C	YDL024C ... DIA3 pseudohyphal growth* acid phosphatase activity cell wall (sensu Fungi) | YDL025C		yes		1.54495		2.01832				1.62975									3.58237	3.60431	3.30136		0.464917	2.3352	0.993891			2.34682	1.65688		2.10756	1.28312	1.7241		0.0788218	1.37611	2.80953	3.40685	1.04726	2.09022		YDL024C	YDL024C ... DIA3 pseudohyphal growth* acid phosphatase activity cell wall (sensu Fungi) | YDL025C	#N/A	#N/A	#N/A	#N/A	#N/A
YIL107C	YIL107C iESR cluster PFK26 fructose 2,6-bisphosphate meta 6-phosphofructo-2-kinase activity cytoplasm | YIL108W		yes		0.736023	0.114346	0.209072		0.360575	-0.373028	0.174071	-0.704743		-0.697962	-0.301443	1.4698	-0.0627294		0.54547	0.938518	1.28239	1.80213		-0.064453	0.0246346	0.152589		1.16245	1.15173	1.52408		1.43395	1.45132	1.39967		-0.0853168	0.109923	0.594935	0.497824	1.62763	1.89391		YIL107C	YIL107C iESR cluster PFK26 fructose 2,6-bisphosphate meta 6-phosphofructo-2-kinase activity cytoplasm | YIL108W	0.638196	0	-0.836686	0	0.597675
YPL230W	YPL230W Ö iESR cluster USV1 biological process unknown molecular function unknown | Putative transcription factor containing a C2H2 zinc finger; mutation affects transcriptional regulation of genes involved in growth on non-fermentable carbon sources, response to salt stress and cell wall biosynthesisYPL231W		yes		-0.040011	-0.273784	0.8484				0.0447876	-0.496157		-1.45285			0.593316				2.0738	2.38709		0.242525	0.723768	3.57885		3.09206	2.20932	4.43823		2.42949	2.31887	2.14459		0.858856	0.356997	1.68691	2.72878	2.55834	2.97918		YPL230W	YPL230W Ö iESR cluster USV1 biological process unknown molecular function unknown | Putative transcription factor containing a C2H2 zinc finger; mutation affects transcriptional regulation of genes involved in growth on non-fermentable carbon sources, response to salt stress and cell wall biosynthesisYPL231W	#N/A	#N/A	#N/A	#N/A	#N/A
YKL103C	YKL103C iESR cluster LAP4 vacuolar protein catabolism aminopeptidase I activity vacuole (sensu Fungi) | YKL104C		yes		-0.141295	-0.525322	-0.009581		-1.04381	-0.846959	-0.825929	-0.955588		-0.789884	-0.512339	-0.945236	-0.210764		0.676842	0.877117	1.05999	1.59354		-0.342438	-0.00464721	0.115882		1.49731	0.666479	1.30073		1.27532	0.987132	1.19306		-0.287985	-0.179809	-0.357296	0.111052	-1.63464	-1.55762		YKL103C	YKL103C iESR cluster LAP4 vacuolar protein catabolism aminopeptidase I activity vacuole (sensu Fungi) | YKL104C	-0.398312	-0.51576	-0.323492	0	0.298496
YGL255W	YGL255W ... ZRT1 high-affinity zinc ion transpo high affinity zinc uptake transportintegral to plasma membrane | YGL256W		yes		-0.198274	-0.386259	-0.027611		-0.0544621	-0.59542	-0.692178	-0.375141		0.686702	0.580502	0.0774836	0.567846		0.561958	1.39795	1.00341	1.29627		0.303493	-0.225315	-0.283337		2.17279	1.15853	1.17208		1.06593	1.1961	1.4182		-0.210152	0.0350689	0.417212	0.240747	0.623234	0.49437		YGL255W	YGL255W ... ZRT1 high-affinity zinc ion transpo high affinity zinc uptake transportintegral to plasma membrane | YGL256W	#N/A	#N/A	#N/A	#N/A	#N/A
YNR067C	YNR067C ... DSE4 cytokinesis, completion of sep "glucan 1,3-beta-glucosidase activit"cell wall (sensu Fungi)* | YNR068C		yes		-0.08558	0.075279	0.341245		-0.0314788	0.0147332	0.411475	0.524172		-0.0650521	-0.138289	-0.02961	-0.119763		-1.01849	-1.08828	-1.14739	-1.11715		-0.0450843	-0.12616	-0.190047		-0.335345	-0.438888	-0.371127		-1.00524	-1.10731	-0.984823		-0.313637	-0.379038	-0.472449	-0.405636	-0.355322	-0.374049		YNR067C	YNR067C ... DSE4 cytokinesis, completion of sep "glucan 1,3-beta-glucosidase activit"cell wall (sensu Fungi)* | YNR068C	-0.771638	-0.454903	0.302943	0	-1.49261
YIL136W	YIL136W iESR cluster OM45 biological process unknown molecular function unknown mitochondrial outer membrane | YIL137C		yes		0.959989	0.385673	-0.566637		-1.69832	1.1124	-0.888098	-0.818085		-2.18981	1.37663	0.0774836	1.03692		3.28244	0.912522	2.11687	2.8364		0.778578	0.155879	0.315819		1.57748	0.437585	1.88569		1.26639	1.02282	1.7458		-0.520586	0.113071	0.643552	0.821888	1.73795	1.58326		YIL136W	YIL136W iESR cluster OM45 biological process unknown molecular function unknown mitochondrial outer membrane | YIL137C	-0.391181	-0.893603	-1.20182	0	0.394502
YER067W	YER067W ... YER067W biological process unknown molecular function unknown cytoplasm* | YER068W		yes		0.445415	-0.525322	-0.736562				-0.955212	0.0888058					0.534423		3.46885		5.29619	3.38709			1.29081	-0.00610888			0.887388	2.65688		2.98531	0.742548	2.63391		-1.44695	-0.776169	-0.872655		1.19644	1.12933		YER067W	YER067W ... YER067W biological process unknown molecular function unknown cytoplasm* | YER068W	0.475489	0.145807	1.04781	0	0.169886
YDR034W-B	YDR034W-B ... YDR034W-B biological process unknown molecular function unknown cellular component unknown | YDR035W		yes		3.28192	-0.203394	0.070792			-1.69496	-1.21825	-1.39662		2.13211	1.54655	1.4698	0.955886			1.84541	2.75187	2.68665		0.448976	1.26809	0.919891			1.74537	1.65688		1.81538	1.25402	1.7981		1.94132	1.2981	3.3289	2.66989	3.89002	3.64821		YDR034W-B	YDR034W-B ... YDR034W-B biological process unknown molecular function unknown cellular component unknown | YDR035W	#N/A	#N/A	#N/A	#N/A	#N/A
YKL107W	YKL107W ... YKL107W biological process unknown molecular function unknown cellular component unknown | YKL108W		yes		-0.040011							-0.911194							1.59438		3.2258	3.77411		1.82749	1.68313	-0.591071		3.89941	1.20932	2.09428		3.28415	1.62485	3.90853		-0.643644	2.03507	2.31768	3.99181	1.16755	3.30111		YKL107W	YKL107W ... YKL107W biological process unknown molecular function unknown cellular component unknown | YKL108W	#N/A	#N/A	#N/A	#N/A	#N/A
YJL161W	YJL161W iESR cluster FMP33 biological process unknown molecular function unknown mitochondrion | YJL162C		yes			-0.788357						-1.49616		1.13211			0.856351					4.33051								2.24184		4.23685	1.78835			-0.888757	0.397639	2.20642		2.38479	2.8099		YJL161W	YJL161W iESR cluster FMP33 biological process unknown molecular function unknown mitochondrion | YJL162C	#N/A	#N/A	#N/A	#N/A	#N/A
YIL099W	YIL099W iESR cluster SGA1 sporulation (sensu Fungi)* "glucan 1,4-alpha-glucosidase activi"vacuole (sensu Fungi) | YIL100C-A		yes		1.12991	1.019	-0.1516		-0.37639	-1.10999	-0.955212	0.0888058		-1.86789			-0.951004		1.88389	2.0678	2.48884	1.40286		0.242525	2.46073	0.315819		1.31445	2.69474	1.9788		2.18794	2.11028	2.76717		1.31983	1.73551	3.07256	4.21421	2.16755	2.01481		YIL099W	YIL099W iESR cluster SGA1 sporulation (sensu Fungi)* "glucan 1,4-alpha-glucosidase activi"vacuole (sensu Fungi) | YIL100C-A	#N/A	#N/A	#N/A	#N/A	#N/A
YDR536W	YDR536W ... STL1 transport* transporter activity plasma membrane* | YDR537C		yes			1.53357	0.263437					1.08881			-2.36034		-0.143649					5.84652								-1.0212						-0.0586817	1.62003	2.12503	3.99181	1.58259	1.82718		YDR536W	YDR536W ... STL1 transport* transporter activity plasma membrane* | YDR537C	#N/A	#N/A	#N/A	#N/A	#N/A
YBR201W	YBR201W ... DER1 ER-associated protein cataboli molecular function unknown endoplasmic reticulum membrane | YBR202W		yes		0.035937	0.489424	0.658576		-0.224387	0.305044	0.909858	-0.496157		-1.45285	0.492107	0.984374	-0.21765		1.64169	0.923411	0.707182	1.14608		0.550647	0.647502	0.0411968		1.24406	1.00557	0.772352		0.819341	1.12667	1.44832		-0.184213	0.0350689	0.990102	0.709778	0.237944	0.489437		YBR201W	YBR201W ... DER1 ER-associated protein cataboli molecular function unknown endoplasmic reticulum membrane | YBR202W	#N/A	#N/A	#N/A	#N/A	#N/A
YMR118C	YMR118C ... YMR118C biological process unknown molecular function unknown cellular component unknown | YMR119W		yes		-0.040011	-2.11029	-0.1516										0.856351							0.242525		-1.00611				1.78616		3.08484		2.32357		0.678284	-1.18732	3.74394	2.76942	2.34813	1.1353		YMR118C	YMR118C ... YMR118C biological process unknown molecular function unknown cellular component unknown | YMR119W	#N/A	#N/A	#N/A	#N/A	#N/A
YMR291W	YMR291W iESR cluster YMR291W biological process unknown protein kinase activity cytoplasm* | YMR292W		yes		0.058553	-0.135279	0.294026		-0.0179362	0.179513	0.504219	0.383253		0.132113	0.492107	-0.267165	0.318255		1.45302	1.7079	1.58195	1.39899		-0.285854	0.0852245	-0.15196		0.840519	0.559813	1.05972		1.21448	0.873519	1.75083		-0.291175	-0.0764993	0.176814	0.767182	0.704764	0.920291		YMR291W	YMR291W iESR cluster YMR291W biological process unknown protein kinase activity cytoplasm* | YMR292W	0	0	0	0	0.954518
YBR054W	YBR054W ... YRO2 biological process unknown molecular function unknown mitochondrion* | YBR055C		yes		-1.77698	-1.78836	0.111435		-4.20928		-4.16467	-2.91119		-1.53085	-0.301443	-0.15469	-0.336294		4.8674		4.03316	4.10619		1.02013	-0.972226	-0.13164		2.67702	0.804926	1.14873		1.45924	2.27378	1.40019		0.0626246	0.356997	2.6205	2.23693	1.2842	0.913596		YBR054W	YBR054W ... YRO2 biological process unknown molecular function unknown mitochondrion* | YBR055C	#N/A	#N/A	#N/A	#N/A	#N/A
YLR054C	YLR054C ... OSW2 spore wall assembly (sensu Fun molecular function unknown cytoplasm* | YLR055C		yes		2.28192	0.474678	2.17033					0.0888058					-0.143649		1.59438	1.26045		3.27161		0.242525	0.138806	-1.2285		3.89941	1.02489	0.171448		3.49988	1.66282	3.27466		-0.0586817	0.520496	1.66163	1.66989	1.27447	1.03577		YLR054C	YLR054C ... OSW2 spore wall assembly (sensu Fun molecular function unknown cytoplasm* | YLR055C	#N/A	#N/A	#N/A	#N/A	#N/A
YGR248W	YGR248W iESR cluster SOL4 biological process unknown 6-phosphogluconolactonase activity cytoplasm* | YGR249W		yes		0.767344	0.69707			-0.961353	-0.109993	0.0447876	-1.91119		-0.867887			-0.143649		2.59438	2.58237	2.71123	4.44154		0.564453	0.0456962	-0.453568		0.899412	0.0573129	0.241838		2.05242	1.78835	1.18606		-0.281074	1.08952	1.34321	0.291374	2.18802	2.24222		YGR248W	YGR248W iESR cluster SOL4 biological process unknown 6-phosphogluconolactonase activity cytoplasm* | YGR249W	-0.256816	1.47604	-0.558624	0	1.25764
YPL054W	YPL054W iESR cluster LEE1 biological process unknown molecular function unknown cellular component unknown | YPL055C		yes														-0.143649																			0.356356	-0.134856	2.60308		1.9611	2.15976		YPL054W	YPL054W iESR cluster LEE1 biological process unknown molecular function unknown cellular component unknown | YPL055C	#N/A	#N/A	#N/A	#N/A	#N/A
YDL027C	YDL027C iESR cluster YDL027C biological process unknown molecular function unknown mitochondrion | YDL028C		yes		-0.040012	-0.161268	0.145786		-0.397452	0.211935	-0.0852729	-0.736107		-0.932017	0.624557	0.781745	-0.369925		1.31427	0.877117	0.730543	1.75704		0.454029	0.997762	0.321945		1.76696	1.27566	1.08243		1.10893	1.12579	0.846914		-0.473719	-0.168945	0.341523	0.184458	0.266663	0.894296		YDL027C	YDL027C iESR cluster YDL027C biological process unknown molecular function unknown mitochondrion | YDL028C	#N/A	#N/A	#N/A	#N/A	#N/A
YDR343C	YDR343C ... HXT6 hexose transport glucose transporter activity* mitochondrion* | YDR344C		yes		-0.279566	-0.166096	0.06085		-0.509973	-1.0701	-0.51464	0.344063		1.13946	0.913612	2.3063	2.04681		0.684795	1.20701	2.02227	1.48282		0.271094	0.361198	0.143269		3.74741	3.23505	3.18329		2.9533	2.50769	2.72911		-1.10522	-0.160061	-1.78924	-2.38323	1.92091	1.47081		YDR343C	YDR343C ... HXT6 hexose transport glucose transporter activity* mitochondrion* | YDR344C	0.534812	0.190147	0.640676	0	0.602706
YBR295W	YBR295W ... PCA1 iron ion homeostasis* "ATPase activity, coupled to transme"membrane | YBR296C		yes		0.115838	0.023261	0.397739		0.312408	0.191176	0.128446	0.0812722		0.620613	0.59718	0.140677	0.390329		1.07045	1.21801	1.1493	1.28165		0.262154	0.195188	0.115882		1.16902	0.865265	0.727391		0.682746	0.778263	0.831103		-0.000773133	0.0889741	0.81117	0.727313	1.09174	1.02105		YBR295W	YBR295W ... PCA1 iron ion homeostasis* "ATPase activity, coupled to transme"membrane | YBR296C	#N/A	#N/A	#N/A	#N/A	#N/A
YIR039C	YIR039C iESR cluster YPS6 biological process unknown aspartic-type endopeptidase activitcell wall (sensu Fungi) | YIR040C		yes		0.601535	1.7477	2.07079		1.26104	2.69736	0.92931	0.726236		3.19101	3.76895	2.76936	1.97183		2.52399	1.77502	1.71123	1.87929		0.440464	0.361198	0.0540121		2.13388	1.87532	1.4795		1.35744	1.19045	0.708855		-0.0162464	0.469472	1.36011	0.367322	1.96936	1.75386		YIR039C	YIR039C iESR cluster YPS6 biological process unknown aspartic-type endopeptidase activitcell wall (sensu Fungi) | YIR040C	#N/A	#N/A	#N/A	#N/A	#N/A
YIR028W	YIR028W ... DAL4 allantoin transport allantoin permease activity membrane | YIR029W		yes		0.281917	1.05964	1.72287		0.0386473	-0.109993	0.0447876			0.132113	0.961592	1.88484			3.00942	2.84541	2.01935	3.59354		0.448976	1.99125	1.07189		2.5209	3.43171	2.69152		1.53159	1.19644	1.90346		-0.582244	1.17946	1.88687	1.74389	1.96592	2.81447		YIR028W	YIR028W ... DAL4 allantoin transport allantoin permease activity membrane | YIR029W	#N/A	#N/A	#N/A	#N/A	#N/A
YNR066C	YNR066C ... YNR066C biological process unknown molecular function unknown membrane fraction | YNR067C		yes		-0.111802	0.347847	0.141182		-0.823849	0.557431	0.385825	0.431694		-0.489375	0.574569	0.299876	0.113508		1.45688	0.205998	0.700341	0.940406		-0.0700655	-0.361268	-0.133864		1.63263	1.82027	2.12958		1.65421	2.16091	2.44151		-0.0412996	-0.241345	1.6886	1.02834	1.86732	2.19522		YNR066C	YNR066C ... YNR066C biological process unknown molecular function unknown membrane fraction | YNR067C	#N/A	#N/A	#N/A	#N/A	#N/A
YGR213C	YGR213C ... RTA1 biological process unknown molecular function unknown integral to membrane | YGR214W		yes		1.03528	1.07147	1.79593		1.36058	1.05993	1.7019	2.01481		0.354506	-0.0384082	1.35432	0.704348		1.98517	2.76295	2.06202	2.19361		0.312914	0.923077	0.488656		1.89941	0.439929	0.563766		1.84453	1.2092	1.06981		0.66121	2.03507	3.35433	4.43239	2.66505	3.03478		YGR213C	YGR213C ... RTA1 biological process unknown molecular function unknown integral to membrane | YGR214W	#N/A	#N/A	#N/A	#N/A	#N/A
YHR096C	YHR096C iESR cluster HXT5 hexose transport glucose transporter activity* plasma membrane | YHR097C		yes		0.075466	0.839674	1.96388		-1.76871	-1.10999	0.366716	-0.259117		0.324758	-1.36034	1.4698	0.296923		4.68184	3.58237	4.18186	4.18141		2.358	0.460734	-1.14361			-1.11261	-0.480628		0.914919	1.52532	2.32357		-0.243106	0.64079	3.87349	4.59753	2.02195	2.07621		YHR096C	YHR096C iESR cluster HXT5 hexose transport glucose transporter activity* plasma membrane | YHR097C	-0.351761	-0.266078	-0.817525	0	-0.249673
YNL115C	YNL115C iESR cluster YNL115C biological process unknown molecular function unknown vacuole (sensu Fungi) | YNL116W		yes		-0.225802	-0.365236	-0.08121		-0.293928	-0.569425	0.0275097	-0.79255		-0.0484591	0.0871227	-0.922516	-0.791806		0.926955	0.845408	0.310195	1.22008		0.151377	-0.109122	-0.0355527		1.80826	0.879775	0.79239		1.09872	1.2202	0.97158		-0.348868	-0.142536	0.355386	0.929201	0.776765	1.0002		YNL115C	YNL115C iESR cluster YNL115C biological process unknown molecular function unknown vacuole (sensu Fungi) | YNL116W	0.041214	-0.136865	-0.180934	0	0.900901
YJL144W	YJL144W iESR cluster YJL144W response to dessication molecular function unknown cytoplasm | YJL145W		yes		0.41942	-0.318872	-0.958954		0.0386473		-1.27714	-0.911194					0.441313		2.33135		2.0738	3.38709		0.242525	-0.709191	-0.591071			1.30243	0.978803		2.65188	2.59571	3.46107		0.526281	0.713141	3.70999	3.83981	1.50859	1.24222		YJL144W	YJL144W iESR cluster YJL144W response to dessication molecular function unknown cytoplasm | YJL145W	#N/A	#N/A	#N/A	#N/A	#N/A
YHR137W	YHR137W iESR cluster ARO9 aromatic amino acid family met aromatic-amino-acid transaminase accytoplasm* | YHR138C		yes		-0.370656	0.196536	0.14796		0.0386473	-0.630825	-0.402671	0.162806		-0.239856	-0.0384082	-2.75902	0.252279		1.10457	1.05881	1.06503	0.409116		1.66813	1.60512	1.40893		2.6193	2.71092	2.6934		1.2681	1.38093	1.82476		1.25871	0.860703	1.56122	1.33409	1.16302	0.916344		YHR137W	YHR137W iESR cluster ARO9 aromatic amino acid family met aromatic-amino-acid transaminase accytoplasm* | YHR138C	0.537948	-0.137585	0.056644	0	-1.10331
YHR043C	YHR043C ... DOG2 response to stress* 2-deoxyglucose-6-phosphatase activicytoplasm* | YHR044C		yes		0.442052	0.552326	0.382945		-0.283281	-0.457917	-0.00674266	-0.642998		-1.86789	-0.523835	-1.36309	-0.434881		1.05381	1.12294	1.3893	1.44154		1.20188	0.938055	1.15828		1.31445	0.0478526	0.250105		1.11655	1.23852	1.23666		1.58975	1.13052	2.3004	1.51182	1.94783	1.61233		YHR043C	YHR043C ... DOG2 response to stress* 2-deoxyglucose-6-phosphatase activicytoplasm* | YHR044C	#N/A	#N/A	#N/A	#N/A	#N/A
YMR040W	YMR040W ... YET2 biological process unknown molecular function unknown integral to membrane | YMR041C		yes		1.7514	1.31118	0.585366			-0.332386	1.04479	-0.804279		-1.86789	-0.260801	1.4698	0.325836			2.0678	1.85807	3.86798		0.71201	0.653379	0.900782		1.19897	0.664995	1.37112		1.0304	1.66282	1.55418		0.526281	1.78996	2.6396	1.99181	0.652982	1.88608		YMR040W	YMR040W ... YET2 biological process unknown molecular function unknown integral to membrane | YMR041C	#N/A	#N/A	#N/A	#N/A	#N/A
YLR345W	YLR345W iESR cluster YLR345W biological process unknown molecular function unknown cytoplasm | YLR346C		yes		1.16644	1.05467	0.784675		-0.0925972	0.27703	0.467479	-0.575591		-1.39145	-0.279416	-1.08479	-0.513599		1.31754	1.12718	0.903874	1.66609		0.0765148	-0.0246931	0.210703		1.37585	1.5063	1.49727		1.55737	1.10385	1.64146		-0.304093	-0.611821	0.018736	-0.318042	0.754128	0.623526		YLR345W	YLR345W iESR cluster YLR345W biological process unknown molecular function unknown cytoplasm | YLR346C	0.63574	-0.673329	0.583101	0	0.441551
YDR391C	YDR391C ... YDR391C biological process unknown molecular function unknown cytoplasm* | YDR392W		yes		0.408346	0.391553	0.172835		-0.0438149	-1.26753	-0.147857	-0.911194		-0.715884	-0.195949	0.206767	-0.719842		0.381386	1.14497	1.06615	1.21174		0.0927776	0.152611	0.486931		0.749665	0.47235	0.201196		1.20954	1.12395	0.696224		0.303888	0.341496	0.902639	0.417822	0.815879	0.740178		YDR391C	YDR391C ... YDR391C biological process unknown molecular function unknown cytoplasm* | YDR392W	-0.333728	-0.75312	-0.688458	0	-0.019826
YGR138C	YGR138C ... TPO2 polyamine transport spermine transporter activity plasma membrane* | YGR139W		yes		-0.364596	-0.191676	-0.18254		-0.565944	-0.474405	-0.348156	-0.115264		0.659625	0.383056	0.547804	0.541045		1.11421	0.883591	0.888444	0.773213		0.0684953	-0.0234658	0.187939		1.76191	1.29858	1.45094		1.50808	1.48173	1.25318		1.62782	1.02442	4.02417	3.33062	3.34746	2.5057		YGR138C	YGR138C ... TPO2 polyamine transport spermine transporter activity plasma membrane* | YGR139W	-0.136917	-0.099242	-0.707423	0	0.494945
YOL084W	YOL084W iESR cluster PHM7 biological process unknown molecular function unknown vacuole (sensu Fungi) | YOL085C		yes		-0.192014	0.018998	0.295859		0.524074	-0.694956	-1.1776	-0.174229		1.39515	-0.301443	1.66245	0.971828		2.10895	2.71988	4.23777	3.7656		2.14942	1.30873	2.05278		1.89941	1.47235	1.9174		0.840918	1.16275	1.42387		0.909609	0.28123	3.27389	2.88748	3.67079	2.88204		YOL084W	YOL084W iESR cluster PHM7 biological process unknown molecular function unknown vacuole (sensu Fungi) | YOL085C	#N/A	#N/A	#N/A	#N/A	#N/A
YGL121C	YGL121C iESR cluster GPG1 signal transduction signal transducer activity cellular component unknown | YGL122C		yes		0.959989		-1.1516							0.132113			-0.728612							0.242525		-0.591071		2.31445	2.20932	1.9788		1.13731		2.32357		1.64176	0.0350689	4.20642	3.22628	4.28857	2.0374		YGL121C	YGL121C iESR cluster GPG1 signal transduction signal transducer activity cellular component unknown | YGL122C	#N/A	#N/A	#N/A	#N/A	#N/A
YJL132W	YJL132W iESR cluster YJL132W biological process unknown molecular function unknown membrane fraction | YJL133C-A		yes		0.386253	0.174169	0.732923		1.846	0.890007	0.165082	-0.259117		1.45404	1.42102	-1.05376	-0.427442		-0.47601	1.43037	0.987939	1.24959		-0.0469819	1.29081	-0.529671		2.24734	2.56921	1.72203		2.22073	1.48879	2.41103		-0.216747	-0.221271	1.33459	1.50415	1.15113	1.23099		YJL132W	YJL132W iESR cluster YJL132W biological process unknown molecular function unknown membrane fraction | YJL133C-A	#N/A	#N/A	#N/A	#N/A	#N/A
YKR049C	YKR049C iESR cluster FMP46 biological process unknown molecular function unknown mitochondrion | YKR050W		yes		-0.241645	-1.37332	-0.312065		-1.07683	-0.261996	0.296326	-1.46374		-0.568327	-0.190411	0.0774836	-0.317679		1.51192	-0.324517	1.01491	1.6624		0.564453	0.712272	0.603945		1.16245	0.938014	1.0528		1.31546	1.37331	1.20975		0.504254	0.178433	0.765135	1.24765	1.38619	0.667983		YKR049C	YKR049C iESR cluster FMP46 biological process unknown molecular function unknown mitochondrion | YKR050W	0.059341	-0.440529	-0.729154	0	0.751302
YGL205W	YGL205W ... POX1 fatty acid beta-oxidation acyl-CoA oxidase activity peroxisomal matrix | YGL206C		yes		-0.888009	2.21164	-1.88857		-1.28328		0.0447877	-0.233122		-0.604852	-1.03841		0.856351		1.81677		4.29619	2.27161		1.34206	0.612737	-0.269143		1.09206	1.57544	1.30073		1.17795	1.20339	1.76717		1.35636	0.0350689	1.4876	1.18446	3.01555	1.60479		YGL205W	YGL205W ... POX1 fatty acid beta-oxidation acyl-CoA oxidase activity peroxisomal matrix | YGL206C	#N/A	#N/A	#N/A	#N/A	#N/A
YGR144W	YGR144W ... THI4 mitochondrial genome maintenan molecular function unknown mitochondrion* | YGR145W		yes		0.544952	-0.788357	0.433362		-1.96135		-0.440639	-0.911194		-0.282924			1.31578		3.00942	3.84541	3.10551	4.51954		1.24252		2.57885		3.89941		4.14873		0.914919	2.95828	1.50414		-0.421252	0.620031	2.4876	3.99181	0.483057	0.701651		YGR144W	YGR144W ... THI4 mitochondrial genome maintenan molecular function unknown mitochondrion* | YGR145W	#N/A	#N/A	#N/A	#N/A	#N/A
YEL049W	YEL049W ... PAU2 biological process unknown molecular function unknown cellular component unknown | YEL050C		yes																		2.71123			0.827487	2.1977	-0.00610888			4.20932	4.22673		2.85352	2.05139	4.5252		-1.05868	1.03507	0.902639		2.75252	2.46461		YEL049W	YEL049W ... PAU2 biological process unknown molecular function unknown cellular component unknown | YEL050C	#N/A	#N/A	#N/A	#N/A	#N/A
YNR064C	YNR064C ... YNR064C response to toxin epoxide hydrolase activity soluble fraction | YNR065C		yes				1.43336				-0.955212	0.0888058			-1.62337	2.4698	-0.143649				-0.0961258	1.85657		2.24252		-0.00610888		4.89941	4.13532	3.22673		2.95931		4.5252		-0.281074	0.909538	1.61885		1.56183	2.30111		YNR064C	YNR064C ... YNR064C response to toxin epoxide hydrolase activity soluble fraction | YNR065C	#N/A	#N/A	#N/A	#N/A	#N/A
YPR030W	YPR030W ... CSR2 cell wall organization and bio molecular function unknown nucleus | YPR031W		yes		-0.262404	-0.908651	0.415441		-1.54632	0.568079	0.977673	0.877302		-0.452849	1.0991	0.0103694	0.644846		2.91631	1.84541	2.01935	2.20691		0.867016	0.661646	0.86836		1.63638	0.421724	1.00855		0.934284	0.668058	1.00164		-0.0586817	0.200128	2.79988	2.75477	2.14331	2.20905		YPR030W	YPR030W ... CSR2 cell wall organization and bio molecular function unknown nucleus | YPR031W	#N/A	#N/A	#N/A	#N/A	#N/A
YOR237W	YOR237W ... HES1 steroid biosynthesis oxysterol binding cellular component unknown | YOR238W		yes		1.76734	2.019	-1.1516				0.459825			-1.86789							0.711229	3.14608		0.827487	1.68313	0.86836		0.899412	1.69474	1.56377		2.65188	2.20982	2.69195		0.941318	1.1346	0.750636		3.04726	2.72027		YOR237W	YOR237W ... HES1 steroid biosynthesis oxysterol binding cellular component unknown | YOR238W	#N/A	#N/A	#N/A	#N/A	#N/A
YPL017C	YPL017C Ö IRC15 biological process unknown S-adenosylmethionine-dependent | Microtubule associated protein; regulates microtubule dynamics; required for accurate meiotic chromosome segregation; null mutant displays large budded cells due to delayed mitotic progression, increased levels of spontaneous Rad52 fociYPL018W		yes		-1.88801	-1.18691	-0.637026			-1.69496	-1.54017	-0.396621		0.869079	-0.0384082	1.88484	0.633958			2.58237	3.29619	2.11961		0.657562	-0.124229	-0.328037		2.31445	0.302425	1.35731		1.82181	1.29085	2.0891		-0.358242	0.315177	2.11209	2.99181	1.36919	1.34175		YPL017C	YPL017C Ö IRC15 biological process unknown S-adenosylmethionine-dependent | Microtubule associated protein; regulates microtubule dynamics; required for accurate meiotic chromosome segregation; null mutant displays large budded cells due to delayed mitotic progression, increased levels of spontaneous Rad52 fociYPL018W	#N/A	#N/A	#N/A	#N/A	#N/A
YHR094C	YHR094C ... HXT1 hexose transport glucose transporter activity* plasma membrane | YHR095W		yes		-0.90206	-0.389538	-0.590885		-0.439544	-0.248664	-0.653446	-0.416709		-0.715078	-1.01909	-0.98141	-1.01115		-1.00752	-1.31598	-1.29891	-0.822364		1.32116	1.28728	1.13139		-3.42851	-3.72029	-4.64429		-2.88678	-2.95073	-2.78496		0.77782	0.691228	1.39474	1.74389	-1.32102	-1.2555		YHR094C	YHR094C ... HXT1 hexose transport glucose transporter activity* plasma membrane | YHR095W	0.388592	0.101533	-0.119232	0	-0.667103
YNL160W	YNL160W iESR cluster YGP1 response to stress* molecular function unknown cell wall (sensu Fungi) | YNL161W		yes		-1.21835	-0.533784	-0.119891		-2.54632	-3.19746	-2.34064	-2.17423		-0.218384	-0.171675	0.154759	-0.26918		2.62239	3.50837	2.84404	3.02682		1.09052	0.335203	0.0870005		3.57748	2.05731	1.68662		1.99292	1.72124	1.70208		-0.181331	0.0281429	0.850379	1.32146	0.363742	0.205835		YNL160W	YNL160W iESR cluster YGP1 response to stress* molecular function unknown cell wall (sensu Fungi) | YNL161W	-1.50849	-1.92434	-1.58201	0	-0.092888
YOR137C	YOR137C ... SIA1 proton transport molecular function unknown cellular component unknown | YOR138C		yes		0.092092	0.409583	0.09504		-0.726887	0.112399	0.334294	-0.109134		-0.633422	0.077069	1.71491	-0.181124		1.73188	0.540554	1.36727	1.676		-0.120045	0.229408	-0.0325811		0.31445	0.399287	0.812153		1.07335	0.622342	0.947189		0.0528266	0.110031	0.554716	-0.915077	1.96901	1.77162		YOR137C	YOR137C ... SIA1 proton transport molecular function unknown cellular component unknown | YOR138C	#N/A	#N/A	#N/A	#N/A	#N/A
YPL171C	YPL171C ... OYE3 biological process unknown NADPH dehydrogenase activity cellular component unknown | YPL172C		yes			0.211643	-1.73656					-0.911194			-0.0384082		1.17828					3.68665		-1.34244		0.730857		3.31445		1.9788		3.61536	2.37331	1.76717		1.21434	0.757535	2.77711	2.25485	2.04202	1.47488		YPL171C	YPL171C ... OYE3 biological process unknown NADPH dehydrogenase activity cellular component unknown | YPL172C	#N/A	#N/A	#N/A	#N/A	#N/A
YOL112W	YOL112W ... MSB4 actin filament organization Rab GTPase activator activity bud tip* | YOL113W		yes		0.508509	0.003057	0.481029		0.744916	-1.69496	0.324896	-1.01073		0.276503	-0.623371	0.469801	-0.334333		0.225146	1.71988	0.339973	1.28139		-0.164385	0.0145989	-0.158112		1.10423	1.29695	1.07396		1.67759	1.19009	1.32648		0.160996	0.0569837	0.362071	0.377103	1.61172	1.68279		YOL112W	YOL112W ... MSB4 actin filament organization Rab GTPase activator activity bud tip* | YOL113W	#N/A	#N/A	#N/A	#N/A	#N/A
YKR011C	YKR011C iESR cluster YKR011C biological process unknown molecular function unknown nucleus | YKR012C		yes		0.063825	0.398729	-0.582235		-2.02025	-1.43192	-0.205191	-2.73716		-1.34182	0.809589	-0.989631	-0.621697		1.74638	1.26045	0.823704	2.51262		-0.306814	0.612737	0.489849		-0.00747833	1.68094	1.3799		1.21558	1.1445	1.22028		-0.0247344	-0.529283	0.876644	-0.319773	0.475677	0.123278		YKR011C	YKR011C iESR cluster YKR011C biological process unknown molecular function unknown nucleus | YKR012C	#N/A	#N/A	#N/A	#N/A	#N/A
YML042W	YML042W iESR cluster CAT2 carnitine metabolism carnitine O-acetyltransferase activmitochondrion* | YML043C		yes		0.959988	0.664155	0.263438		0.0386473	-0.109993	1.95168	0.35184		-0.867887	-0.0384082	1.4698	0.119385		2.25734	1.58237	1.31891	1.68665		1.24252	0.786504	0.793592		2.38484	0.735385	0.896341		0.950543	0.86312	1.18852		0.841783	0.567564	1.76393	1.18446	2.07829	1.30523		YML042W	YML042W iESR cluster CAT2 carnitine metabolism carnitine O-acetyltransferase activmitochondrion* | YML043C	0.661748	0.055629	-0.297435	0	1.92908
YAL028W	YAL028W ... FRT2 response to stress molecular function unknown endoplasmic reticulum | YAL029C		yes		1.41942	-0.051391	-0.666173		-0.961353		0.151703	-0.326232		0.132113	-0.623371		-0.336294		1.59438		0.488837	2.31114		-0.172513	-0.124229	0.578854		1.89941	0.780473	0.744338		1.41742	1.62485	1.84963		-0.245095	-0.322483	-0.141755	0.219224	0.415942	0.717557		YAL028W	YAL028W ... FRT2 response to stress molecular function unknown endoplasmic reticulum | YAL029C	#N/A	#N/A	#N/A	#N/A	#N/A
YER028C	YER028C ... MIG3 negative regulation of transcr DNA binding* nucleus | YER029C		yes		-0.58935	-0.953943	-0.611032		-0.639425	0.890007	0.459825	0.323271		-1.28292		-0.922516	-0.909184		-1.31251	-1.47652	-1.73356	-1.63528		0.127047	-0.0841514	-0.213914		-0.38599	-1.50747	-2.13082		-0.933078	-1.27219	-1.10372		-0.092629	-0.200998	-6.39e-05	0.0712477	-0.673748	-0.256883		YER028C	YER028C ... MIG3 negative regulation of transcr DNA binding* nucleus | YER029C	#N/A	#N/A	#N/A	#N/A	#N/A
YLR312C	YLR312C iESR cluster YLR312C biological process unknown molecular function unknown cellular component unknown | YLR312W-A		yes			0.533572	-1.1516		0.0386473			-0.911194		-1.45285			-2.14365		1.59438			3.59354		1.24252	-0.446157	1.57885		2.31445	1.37281	2.56377		1.23685	1.95828	1.6646		0.0857082	-0.357248	1.4096	1.18446	2.15229	2.41976		YLR312C	YLR312C iESR cluster YLR312C biological process unknown molecular function unknown cellular component unknown | YLR312W-A	#N/A	#N/A	#N/A	#N/A	#N/A
YPR006C	YPR006C ... ICL2 propionate metabolism* methylisocitrate lyase activity mitochondrial matrix | YPR007C		yes		1.25955	0.137643	0.433362				0.366716	-0.174229					-0.406684			0.675483	0.389301	1.82415		-0.342438	-0.539266	0.993891		2.31445	1.13532	1.64177		3.37435	2.52532	1.6646		0.168387	0.240653	1.40321	1.58971	0.316932	0.637628		YPR006C	YPR006C ... ICL2 propionate metabolism* methylisocitrate lyase activity mitochondrial matrix | YPR007C	#N/A	#N/A	#N/A	#N/A	#N/A
YJL100W	YJL100W ... LSB6 actin filament organization* 1-phosphatidylinositol 4-kinase actcytoplasm* | YJL101C		yes		-0.364974	-0.941209	-0.314658		0.34677	0.474969	0.124222	0.146909		-1.45285	0.353909	-0.258119	-0.748511		-1.88367	-0.865085	-0.859087	-0.946568		-0.0769351	-0.41829	-0.133864		-0.70545	-0.825899	-0.12248		-0.651665	-0.597707	-0.360933		-0.0262602	-0.17333	0.6656	0.480851	-0.100735	-0.0881706		YJL100W	YJL100W ... LSB6 actin filament organization* 1-phosphatidylinositol 4-kinase actcytoplasm* | YJL101C	#N/A	#N/A	#N/A	#N/A	#N/A
YDR070C	YDR070C iESR cluster FMP16 biological process unknown molecular function unknown mitochondrion | YDR071C		yes			-0.788357															3.71123	4.81593		-1.56483	-1.44616	0.578854			-0.849578	0.563766		2.82181	1.59571	0.224029		-1.05868	-0.090462	2.09904	2.40685	0.068019	0.657257		YDR070C	YDR070C iESR cluster FMP16 biological process unknown molecular function unknown mitochondrion | YDR071C	#N/A	#N/A	#N/A	#N/A	#N/A
YGL158W	YGL158W ... RCK1 protein amino acid phosphoryla protein serine/threonine kinase actcellular component unknown | YGL159W		yes		-0.040011	-0.788357	0.362973		0.0386473		-1.37025	-0.174229		-0.867887	-0.0384082		-1.14365		2.17934		3.01935	2.00858		0.43517	1.29081	-1.2285		1.09206	1.30243	0.871888		1.30724	0.788352	2.94024		-0.0586817	0.0350689	0.902639	0.991813	0.376141	1.70165		YGL158W	YGL158W ... RCK1 protein amino acid phosphoryla protein serine/threonine kinase actcellular component unknown | YGL159W	#N/A	#N/A	#N/A	#N/A	#N/A
YKL071W	YKL071W ... YKL071W biological process unknown molecular function unknown cytoplasm | YKL072W		yes		-2.04001	0.211643															1.90387	2.68665		1.56445	-0.124229	1.57885			1.62435	2.56377		2.34788	2.78835	2.87611		1.19507	0.831536	1.24659	1.74389	0.604619	0.242219		YKL071W	YKL071W ... YKL071W biological process unknown molecular function unknown cytoplasm | YKL072W	#N/A	#N/A	#N/A	#N/A	#N/A
YJL108C	YJL108C ... PRM10 conjugation with cellular fusi molecular function unknown integral to membrane | YJL109C		yes		-0.243226	-0.360023	0.114794		-1.52323	-1.50688	-1.33892	-1.23312		0.3072	-0.2761	0.17356	0.112296		2.20206	1.71111	1.60431	1.63261		0.0263913	0.326878	-0.00610888		-0.138723	0.537803	0.305784		0.801262	0.878954	0.416674		-0.194565	0.204994	1.58678	1.81494	0.753597	0.691527		YJL108C	YJL108C ... PRM10 conjugation with cellular fusi molecular function unknown integral to membrane | YJL109C	#N/A	#N/A	#N/A	#N/A	#N/A
YJL141C	YJL141C iESR cluster YAK1 protein amino acid phosphoryla protein kinase activity cytoplasm* | YJL142C		yes		-0.172766	-0.129393	0.086343		-0.266207	-0.109993	-0.145544	-0.389848		-0.452849	-0.224821	-3.00593	-0.126776		0.169882	0.739614	0.525363	1.21534		-0.201082	0.0843578	-0.158112		-0.0181256	0.671659	0.241838		0.96455	1.09914	1.15964		-0.466664	0.0679122	0.829197	0.873169	0.578343	0.879988		YJL141C	YJL141C iESR cluster YAK1 protein amino acid phosphoryla protein kinase activity cytoplasm* | YJL142C	-0.263921	-0.064271	-0.199335	0	0.177541
YOR386W	YOR386W ... PHR1 photoreactive repair deoxyribodipyrimidine photo-lyase anucleus* | YOR387C		yes		0.853073	-0.042113	0.507364		0.524074	-0.109993	-0.817709	-0.64816		0.132113	0.961592	0.147873	0.534423		0.371987	2.37592	1.39864	1.494		-0.0735028	0.228073	0.167921		0.290603	1.50272	1.46159		1.48012	1.3244	1.82761		-0.305596	-0.0869216	-0.215543	0.197397	1.63199	1.79653		YOR386W	YOR386W ... PHR1 photoreactive repair deoxyribodipyrimidine photo-lyase anucleus* | YOR387C	#N/A	#N/A	#N/A	#N/A	#N/A
YHL024W	YHL024W ... RIM4 meiosis* RNA binding cytoplasm | YHL025W		yes		-0.58058	-0.290857	-0.289104		-0.639425	0.153041	-1.88121	-1.80428		1.30204	0.961592	0.806836	0.200305		1.00942	-0.324517	2.04138	1.20122		2.76609	1.82997	3.74878		4.48437	3.53124	5.47066		3.39698	2.96858	3.38118		1.78378	2.26773	1.1636	0.892278	3.33194	3.56655		YHL024W	YHL024W ... RIM4 meiosis* RNA binding cytoplasm | YHL025W	#N/A	#N/A	#N/A	#N/A	#N/A
YDR277C	YDR277C ... MTH1 signal transduction* molecular function unknown cellular component unknown | YDR278C		yes		-1.04001	-0.251329	0.00452		1.03865	-1.91735	-0.27714	-0.64816		0.547151	0.154237		0.341777		0.23181	2.26045	1.1518	2.18915		-0.281037	0.653379	0.356461		0.960813	1.86139	1.63088		1.69628	1.11028	1.02811		-1.22861	-0.495446	-0.807854	0.291374	0.430589	0.643317		YDR277C	YDR277C ... MTH1 signal transduction* molecular function unknown cellular component unknown | YDR278C	#N/A	#N/A	#N/A	#N/A	#N/A
YDR534C	YDR534C ... FIT1 siderophore transport molecular function unknown cell wall (sensu Fungi) | YDR535C		yes		-0.361939	0.614999	0.735926		1.03865	0.890007	-0.308849	0.0888058		-0.282924	-0.301443	-1.05376	0.519316		0.179342	0.675483	1.12627	1.34961		1.82749	0.875771	0.559488		5.1218	3.25371	3.08314		2.81646	2.63384	3.16722		0.0153189	0.865144	0.976639	0.821888	0.990017	1.15976		YDR534C	YDR534C ... FIT1 siderophore transport molecular function unknown cell wall (sensu Fungi) | YDR535C	#N/A	#N/A	#N/A	#N/A	#N/A
YJR005C-A	YJR005C-A ... YJR005C-A biological process unknown molecular function unknown cellular component unknown | YJR005W		yes			2.91208	2.01832																	1.24252		2.80125		3.89941		4.43823		4.25477	3.6675	3.68614									YJR005C-A	YJR005C-A ... YJR005C-A biological process unknown molecular function unknown cellular component unknown | YJR005W	#N/A	#N/A	#N/A	#N/A	#N/A
YPL123C	YPL123C ... RNY1 cellular morphogenesis endoribonuclease activity extracellular region | YPL124W		yes		0.592257	0.084264	0.22391		-0.420784	-1.52503	0.334294	-0.376858		-2.32732	-0.231053	-0.700124	0.0427637		1.00942	1.48284	0.251798	0.879295		-0.576903	-0.496198	-0.137353		-1.00748	1.1284	0.847559		1.84982	1.76698	1.5866		-0.54772	0.00300772	1.28115	0.94345	0.958327	0.821887		YPL123C	YPL123C ... RNY1 cellular morphogenesis endoribonuclease activity extracellular region | YPL124W	-0.993818	-0.365336	-0.697504	0	-0.15872
YLR080W	YLR080W iESR cluster EMP46 ER to Golgi transport molecular function unknown Golgi membrane* | YLR081W		yes		0.748485	1.21164	0.732923		2.03865	0.474969	2.04479	0.825771					-0.728612		1.33135	1.99741	1.0738	2.85657		0.701956	-1.12423	-1.2285		0.899412	1.38989	0.871888		0.703415	2.90383	2.6646		-0.686713	-0.140018	0.902639	1.66989	0.845627	0.945826		YLR080W	YLR080W iESR cluster EMP46 ER to Golgi transport molecular function unknown Golgi membrane* | YLR081W	#N/A	#N/A	#N/A	#N/A	#N/A
YML058W-A	YML058W-A ... HUG1 response to DNA damage stimulu molecular function unknown cytoplasm | YML059C		yes		1.95999	-1.01075	0.8484		0.0386473		-1.82968	0.0888058		0.132113			-1.14365		2.59438	0.260446	1.31891	1.14608		-0.0794034	-1.86119	-0.684181		2.57748	-0.43454	0.978803		2.82181	2.66282	2.53769		0.289242	0.800604	1.3501	2.25485	-0.291877	0.620731		YML058W-A	YML058W-A ... HUG1 response to DNA damage stimulu molecular function unknown cytoplasm | YML059C	#N/A	#N/A	#N/A	#N/A	#N/A
YDL222C	YDL222C iESR cluster FMP45 cell wall organization and bio molecular function unknown mitochondrion* | YDL223C		yes		-0.303045	-0.022822	-0.1516		0.62361	0.153041	0.459825	1.59131		-0.0198899	-0.552981	2.20677	-0.143649		1.14692	1.19905	2.24372	1.93904		0.448976	-0.294154	-0.13164		0.198973	1.24102	0.393841		1.00803	1.43221	1.29709		0.0788218	0.0350689	1.6251	-1.09565	1.43059	0.769466		YDL222C	YDL222C iESR cluster FMP45 cell wall organization and bio molecular function unknown mitochondrion* | YDL223C	#N/A	#N/A	#N/A	#N/A	#N/A
YLR178C	YLR178C iESR cluster TFS1 regulation of proteolysis and lipid binding* soluble fraction | YLR179C		yes		1.20284	0.70263	0.48583		0.586135	-1.05341	0.865818	0.771616		0.338564	-0.981825	0.147873	-0.533596		2.02828	3.14497	2.26342	2.0913		-0.0794034	0.494681	0.0740615		-0.422516	0.365435	0.434483		1.37435	0.610015	1.11411		-0.33879	0.250082	1.10796	1.27192	1.89567	1.68279		YLR178C	YLR178C iESR cluster TFS1 regulation of proteolysis and lipid binding* soluble fraction | YLR179C	-0.135712	-0.225023	-0.380829	0	0.044988
YBR053C	YBR053C iESR cluster YBR053C biological process unknown molecular function unknown cellular component unknown | YBR054W		yes		-0.217408	-0.753592	-0.609806		-0.757819	-0.321497	-0.633284	-0.558313		-0.104926	0.0257221	-0.989631	0.125167		1.08342	1.01252	1.12251	1.28965		0.179331	-0.00492989	-0.150499		0.770129	1.02941	0.847013		0.69432	0.887888	0.826958		-0.576365	-0.377794	-0.0404988	0.525839	0.393877	0.509599		YBR053C	YBR053C iESR cluster YBR053C biological process unknown molecular function unknown cellular component unknown | YBR054W	-0.311798	-0.219901	-0.323564	0	0.235011
YMR122W-A	YMR122W-A ... YMR122W-A biological process unknown molecular function unknown cytoplasm* | YMR123W		yes		0.280553	0.160334	0.58627		-0.893977	-0.938292	-0.704669	-0.585819		0.340479	0.363777	0.566016	0.432883		1.37138	1.49817	1.12806	1.13778		0.518626	0.477807	0.809467		1.68772	0.952451	1.39333		1.15536	0.978874	0.920965		0.0693517	0.249009	0.82475	1.49324	1.17627	1.06497		YMR122W-A	YMR122W-A ... YMR122W-A biological process unknown molecular function unknown cytoplasm* | YMR123W	#N/A	#N/A	#N/A	#N/A	#N/A
YMR280C	YMR280C ... CAT8 positive regulation of transcr specific RNA polymerase II transcrinucleus | YMR281W		yes		-0.146926	0.714144	0.263437		-0.961353	-2.10999	0.0447876	-2.99866		-0.867887	-0.71648	0.0103694	-0.324222		2.59438	2.71988	1.48884	4.07897		0.928416	1.10843	0.0934268			2.0084	0.871888		1.14841	0.848473	1.7241		-0.133644	0.000717423	0.621226	-0.0956496	1.11927	1.24222		YMR280C	YMR280C ... CAT8 positive regulation of transcr specific RNA polymerase II transcrinucleus | YMR281W	#N/A	#N/A	#N/A	#N/A	#N/A
YHR092C	YHR092C ... HXT4 hexose transport glucose transporter activity* plasma membrane | YHR093W		yes		-0.18203	-0.65509	0.454121		0.547661	-0.28508	-0.0376745	0.707716		0.289654	-1.16769	-0.700124	0.258449		0.799964	0.978675	0.860806	0.555006		0.484599	-0.138035	0.348734		2.15317	1.41632	1.53575		1.02769	1.20685	0.74077		-0.718283	-0.382837	-1.84922	-1.3284	-0.659739	-0.584612		YHR092C	YHR092C ... HXT4 hexose transport glucose transporter activity* plasma membrane | YHR093W	#N/A	#N/A	#N/A	#N/A	#N/A
YHR137C-A	YHR137C-A | YHR137W		yes				0.433363																			1.99389				1.9788			1.90383	2.00164									YHR137C-A	YHR137C-A | YHR137W	#N/A	#N/A	#N/A	#N/A	#N/A
YML118W	YML118W ... NGL3 biological process unknown endonuclease activity cellular component unknown | YML119W		yes		3.28192	2.8555	3.30783		-0.546315	-1.10999	0.459825	3.08881			-1.03841		1.44131		2.33135	3.43037	2.99134	1.81593		-0.0469819	0.423259	1.44135		-0.560019	1.18695	1.10433		1.55235	1.26834	0.380149		0.197658	0.675527	-0.138003	-0.0956496	0.260664	1.32468		YML118W	YML118W ... NGL3 biological process unknown endonuclease activity cellular component unknown | YML119W	#N/A	#N/A	#N/A	#N/A	#N/A
YFL057C	YFL057C ... AAD16 aldehyde metabolism aryl-alcohol dehydrogenase activitycellular component unknown | YFL058W		yes		0.860453	-0.607785	1.48067		0.453685	0.890007	-0.440639	-0.326232					-0.406684		0.0094172	-0.154592	0.829874	1.04029		1.24252	1.68313	0.631321			4.05731	1.93816		2.37435	2.44043	1.80899		-0.168306	0.766252	0.273007	0.347957	0.0730371	-0.314174		YFL057C	YFL057C ... AAD16 aldehyde metabolism aryl-alcohol dehydrogenase activitycellular component unknown | YFL058W	#N/A	#N/A	#N/A	#N/A	#N/A
YDL169C	YDL169C ... UGX2 biological process unknown molecular function unknown cellular component unknown | YDL170W		yes														-0.143649				1.48884			-1.0794	1.46073	-1.00611		1.57748	2.47235	0.563766		3.08484	2.01074	2.32357		0.31983	0.520496	1.90264	0.669885	1.77163	2.16822		YDL169C	YDL169C ... UGX2 biological process unknown molecular function unknown cellular component unknown | YDL170W	#N/A	#N/A	#N/A	#N/A	#N/A
YPR167C	YPR167C ... MET16 methionine metabolism* phosphoadenylyl-sulfate reductase (cytoplasm* | YPR168W		yes		0.935741	0.211644	0.116889		-0.698318	-2.27992	2.29272	-0.69969		0.395148	-0.400978		-0.932145		2.12489	1.26045	0.356386	1.47515		-1.40133	-1.12423	-1.00611		0.255556	0.47235	0.442204		1.45924	1.13231	1.14707		-0.214801	-0.797821	0.807061	-0.256114	-0.532885	-0.73269		YPR167C	YPR167C ... MET16 methionine metabolism* phosphoadenylyl-sulfate reductase (cytoplasm* | YPR168W	#N/A	#N/A	#N/A	#N/A	#N/A
YJL045W	YJL045W ... YJL045W cellular respiration succinate dehydrogenase (ubiquinonemitochondrion | YJL046W		yes			0.211643	-1.1516								-0.0384082		-1.14365															3.08484				1.84821	2.45011	4.03192	4.99181	2.79982	2.97918		YJL045W	YJL045W ... YJL045W cellular respiration succinate dehydrogenase (ubiquinonemitochondrion | YJL046W	#N/A	#N/A	#N/A	#N/A	#N/A
YBR204C	YBR204C iESR cluster YBR204C biological process unknown serine hydrolase activity lipid particle | YBR205W		yes		0.26665	-0.442361	-0.277131		-0.183745	-0.788065	-0.526369	-1.19413		-0.675242	0.131517	-0.230639	-0.475493		0.883886	0.260446	0.607481	1.31892		0.472822	0.420092	-0.310963		1.19897	1.01667	0.477257		0.791537	0.703463	1.36263		-0.291044	-0.318568	-0.133581	-1.3391	0.526676	0.511215		YBR204C	YBR204C iESR cluster YBR204C biological process unknown serine hydrolase activity lipid particle | YBR205W	#N/A	#N/A	#N/A	#N/A	#N/A
YGR052W	YGR052W ... FMP48 biological process unknown kinase activity mitochondrion | YGR053C		yes		1.28192		2.65576				-2.76257	-0.326232					0.441313				4.99134	3.14608		2.56445	-0.709191	3.31582			0.887388	3.56377		1.29343	2.87581	0.849634		0.0482335	1.03507	1.59452	3.66989	0.789043	1.72765		YGR052W	YGR052W ... FMP48 biological process unknown kinase activity mitochondrion | YGR053C	#N/A	#N/A	#N/A	#N/A	#N/A
YEL039C	YEL039C iESR cluster CYC7 electron transport electron carrier activity mitochondrial intermembrane space | YEL040W		yes		-1.04001	1.08611	0.8484				0.366716	-1.91119		-1.45285			-0.336294				1.04138	2.494		0.306655	-0.33068	-0.150499		2.24734	1.24728	1.39384		2.28617	2.04211	2.09356		0.375721	-0.271592	0.216747	0.0221869	1.78592	1.79615		YEL039C	YEL039C iESR cluster CYC7 electron transport electron carrier activity mitochondrial intermembrane space | YEL040W	#N/A	#N/A	#N/A	#N/A	#N/A
[truncated: 6,006 more rows]
[truncated: 6 more columns]
