# Supplementary material for: The genetic basis of aneuploidy tolerance in wild yeast
Source: eLife. 2020 Jan 7;9:e52063. doi: 10.7554/eLife.52063 (PMC6970514; doi:10.7554/eLife.52063)
Supplement: Supplementary file 3. [file elife-52063-supp3.xlsx]

## Sheet: Sheet1
Majority protein IDs	hYPS1009 wt rep1	hYPS1009 wt rep2	hYPS1009 wt rep3	hYPS1009 ssd1- rep1	hYPS1009 ssd1- rep2	hYPS1009 ssd1- rep3	hYPS1009_Chr12 wt rep 1	hYPS1009_Chr12 wt rep 2	hYPS1009_Chr12 wt rep 3	hYPS1009_Chr12 ssd1- rep 1	hYPS1009_Chr12 ssd1- rep 2	hYPS1009_Chr12 ssd1- rep 3
YGR192C	587710000000	650820000000	646000000000	481790000000	545710000000	521710000000	529900000000	609630000000	600080000000	550400000000	533820000000	561460000000
YHR174W	377660000000	419580000000	405970000000	351520000000	375570000000	316180000000	391840000000	438380000000	376890000000	340250000000	373270000000	337690000000
YLR044C	382000000000	346750000000	399540000000	351160000000	333260000000	383940000000	420350000000	429890000000	483120000000	415570000000	404880000000	445160000000
YPR080W;YBR118W	278310000000	284140000000	272420000000	299700000000	309910000000	267110000000	281090000000	295160000000	264510000000	252690000000	278720000000	236910000000
YCR012W	312380000000	351610000000	304480000000	278490000000	308060000000	242790000000	272340000000	313640000000	250220000000	246190000000	258580000000	242550000000
YLL024C	287440000000	321140000000	283090000000	269850000000	294420000000	242830000000	447310000000	473380000000	420650000000	354880000000	398310000000	338390000000
YOR063W	204450000000	223870000000	204300000000	265210000000	273640000000	190520000000	261980000000	289470000000	197510000000	180830000000	241620000000	189780000000
YDL229W	255290000000	261160000000	250860000000	229420000000	260750000000	219000000000	224240000000	244200000000	213340000000	191870000000	223390000000	192600000000
YLR249W	253300000000	228490000000	253910000000	260490000000	256780000000	242780000000	428030000000	445080000000	432580000000	349650000000	393830000000	345250000000
YOR133W;YDR385W	233340000000	214300000000	246150000000	210960000000	206820000000	234480000000	221120000000	209110000000	256840000000	220250000000	201550000000	219350000000
YHL033C	183800000000	192110000000	196180000000	168670000000	205100000000	161510000000	178960000000	205110000000	179770000000	167640000000	177800000000	151490000000
YIL018W;YFR031C-A	194570000000	214560000000	189750000000	186490000000	196910000000	142490000000	187810000000	201240000000	154560000000	150050000000	176010000000	136480000000
YPL061W	147040000000	147600000000	149670000000	175240000000	176570000000	151290000000	164790000000	171790000000	155920000000	162940000000	177470000000	158030000000
YGL123W	147890000000	161920000000	156080000000	150070000000	170560000000	135750000000	146910000000	164170000000	142730000000	125960000000	143560000000	118460000000
YJR145C;YHR203C	168810000000	209240000000	195820000000	147450000000	168030000000	149500000000	143060000000	173680000000	147630000000	147080000000	136280000000	133530000000
YAL038W	186220000000	160610000000	189240000000	179740000000	167830000000	180860000000	192590000000	189340000000	211530000000	192200000000	185180000000	190070000000
YKL060C	161180000000	180680000000	164560000000	160070000000	166240000000	152490000000	167240000000	184290000000	164740000000	155670000000	164030000000	152650000000
YMR186W	139890000000	141980000000	149400000000	155310000000	151340000000	140680000000	159150000000	164160000000	158080000000	133770000000	150300000000	132500000000
YLR441C	151990000000	154420000000	166570000000	123060000000	146910000000	134600000000	141210000000	163430000000	155680000000	125900000000	115230000000	127810000000
YKL152C	133690000000	154850000000	152680000000	139990000000	146300000000	121030000000	134160000000	149530000000	119190000000	117190000000	141950000000	107740000000
YLR075W	123850000000	158060000000	142200000000	107950000000	138150000000	119020000000	110650000000	127080000000	118940000000	107040000000	102530000000	114740000000
YJR123W	135510000000	165360000000	144520000000	120180000000	135980000000	123970000000	122990000000	140240000000	131440000000	113360000000	124330000000	120780000000
YJR045C	102450000000	120310000000	101460000000	117990000000	132370000000	108380000000	63432000000	75022000000	57867000000	72493000000	85919000000	73373000000
YGL008C	132900000000	134940000000	137490000000	122020000000	130210000000	119690000000	116230000000	117810000000	113940000000	113520000000	111430000000	112610000000
YBR031W;YDR012W	127390000000	138430000000	129030000000	117720000000	126570000000	115550000000	119140000000	128380000000	111840000000	100480000000	113270000000	109270000000
YOL086C	110620000000	100270000000	114090000000	129440000000	123630000000	107880000000	144280000000	149590000000	134030000000	121280000000	137290000000	119500000000
YOR096W	103490000000	126820000000	119670000000	105950000000	121160000000	102590000000	108380000000	125840000000	97361000000	86152000000	101770000000	82338000000
YPL090C;YBR181C	111960000000	120890000000	130490000000	102580000000	114670000000	104220000000	93471000000	110850000000	105560000000	102050000000	98752000000	95580000000
YER165W	93310000000	108120000000	89126000000	102920000000	114030000000	78804000000	94638000000	107360000000	79347000000	78463000000	97577000000	76249000000
YPL231W	94736000000	95862000000	99788000000	103440000000	103550000000	104520000000	91734000000	94472000000	95415000000	95817000000	98341000000	102460000000
YNL178W	118240000000	120770000000	111520000000	97652000000	97147000000	101070000000	98682000000	108170000000	101520000000	94520000000	76962000000	90276000000
YDR050C	97099000000	106220000000	100320000000	82259000000	94753000000	85240000000	90517000000	95708000000	93432000000	82051000000	87523000000	83417000000
YGL076C	89933000000	92183000000	92731000000	90382000000	91109000000	87792000000	106480000000	114410000000	94545000000	69185000000	84569000000	72824000000
YLR259C	66594000000	76900000000	67741000000	82514000000	90385000000	72576000000	96765000000	106480000000	89458000000	93992000000	116390000000	98014000000
YOL120C;YNL301C	70786000000	83365000000	81845000000	75325000000	88441000000	58585000000	88706000000	89219000000	61286000000	47087000000	64414000000	47852000000
YPL106C	80895000000	87763000000	78489000000	83275000000	84457000000	69139000000	101690000000	111000000000	90582000000	80275000000	91979000000	80967000000
YML026C;YDR450W	83213000000	98813000000	105150000000	74105000000	84137000000	85709000000	82748000000	88285000000	86634000000	71267000000	60937000000	60342000000
YMR142C	68085000000	85869000000	80040000000	65687000000	83881000000	72431000000	73592000000	80369000000	69716000000	64495000000	68594000000	66747000000
YIL133C	58268000000	77280000000	69481000000	67788000000	81883000000	54632000000	71162000000	82631000000	64764000000	51777000000	62706000000	46278000000
YPL131W	102710000000	89913000000	93182000000	76572000000	80601000000	83490000000	85005000000	84324000000	86070000000	80811000000	70842000000	81405000000
YLR029C	68057000000	77519000000	75995000000	68778000000	78005000000	64654000000	74149000000	80239000000	71615000000	60460000000	63950000000	58994000000
YER102W;YBL072C	99936000000	112570000000	108420000000	61560000000	75901000000	87715000000	65922000000	73572000000	85174000000	81610000000	55640000000	81760000000
YBR084C-A;YBL027W	88135000000	102040000000	112430000000	60583000000	72511000000	102290000000	72853000000	76171000000	100820000000	79740000000	51845000000	96360000000
YKL180W	77291000000	82661000000	81037000000	56533000000	71480000000	73770000000	68893000000	71787000000	73039000000	67882000000	55899000000	64576000000
YBR189W	73645000000	76903000000	88598000000	59373000000	71056000000	72693000000	70809000000	74333000000	79934000000	65343000000	49982000000	60049000000
YLR340W	62394000000	60240000000	56319000000	67852000000	66043000000	55576000000	61803000000	61665000000	57150000000	50999000000	61438000000	45310000000
YBR196C	74722000000	68352000000	77108000000	71534000000	65403000000	79250000000	72402000000	71951000000	81207000000	77578000000	77124000000	79951000000
YBR191W	77969000000	91841000000	90311000000	49153000000	65303000000	73045000000	64062000000	64597000000	73722000000	65247000000	49279000000	61655000000
YJL080C	56405000000	58461000000	57390000000	60706000000	64028000000	51043000000	48759000000	51719000000	45091000000	43360000000	50446000000	41655000000
YFL039C	69955000000	67077000000	69335000000	65955000000	63331000000	77779000000	60557000000	56246000000	61625000000	71246000000	65937000000	77305000000
YKL182W	66355000000	55399000000	68979000000	72258000000	62048000000	77302000000	62107000000	55385000000	70936000000	70964000000	64259000000	72578000000
YAL003W	56619000000	62203000000	71080000000	49662000000	60667000000	58500000000	56039000000	55995000000	62882000000	52966000000	50888000000	53364000000
YDR025W;YBR048W	66514000000	75224000000	76623000000	50204000000	59434000000	69325000000	51785000000	59911000000	63470000000	58258000000	43816000000	58345000000
YBL099W	45802000000	49367000000	48164000000	57360000000	59297000000	57481000000	24126000000	23697000000	23811000000	31559000000	33647000000	32988000000
YLR150W	95187000000	80528000000	101670000000	43704000000	57546000000	84046000000	80516000000	81346000000	132090000000	115240000000	63819000000	116220000000
YDL055C	43075000000	35321000000	46594000000	56005000000	57095000000	52928000000	38622000000	37875000000	37139000000	51009000000	54292000000	47826000000
YKL056C	59541000000	59365000000	71045000000	46449000000	56641000000	63799000000	53257000000	56301000000	67908000000	63588000000	43001000000	60979000000
YPL220W;YGL135W	65470000000	63134000000	65068000000	62300000000	56329000000	57491000000	61618000000	58523000000	60474000000	52424000000	56763000000	51013000000
YJL034W	42791000000	43630000000	45213000000	52546000000	56258000000	50366000000	36291000000	41095000000	36036000000	72576000000	76045000000	73739000000
YLR180W	50807000000	54490000000	49032000000	52657000000	54660000000	47113000000	102230000000	106070000000	96646000000	84089000000	98733000000	81754000000
YLR304C	42672000000	51325000000	42029000000	54155000000	54221000000	52696000000	48445000000	44750000000	39654000000	52465000000	52450000000	50779000000
YEL034W	74550000000	76889000000	94425000000	41861000000	53651000000	76295000000	49650000000	54990000000	87227000000	66485000000	46555000000	67550000000
YOR198C	43566000000	51225000000	52906000000	46752000000	52250000000	45720000000	37743000000	44261000000	40422000000	51430000000	57203000000	58549000000
YGR155W	54449000000	63187000000	54184000000	49790000000	51662000000	43903000000	55680000000	59238000000	49706000000	45581000000	50681000000	41297000000
YBR079C	48580000000	55092000000	48111000000	54470000000	51091000000	46715000000	50264000000	51299000000	47355000000	45659000000	49162000000	45868000000
YOL040C	55893000000	66960000000	64418000000	34803000000	50234000000	59401000000	44343000000	49648000000	50329000000	56922000000	35609000000	56096000000
YDR155C	59886000000	64138000000	64119000000	40646000000	49551000000	46330000000	43832000000	46630000000	47996000000	54352000000	41259000000	53057000000
YPR102C;YGR085C	67956000000	71044000000	68620000000	40915000000	49408000000	57451000000	47658000000	52738000000	57802000000	50842000000	37807000000	53003000000
YMR116C	45674000000	40474000000	47083000000	52142000000	48330000000	50396000000	49509000000	47176000000	49618000000	43699000000	45717000000	43985000000
YLR448W	61545000000	75381000000	75032000000	39540000000	47611000000	61040000000	55404000000	62147000000	67493000000	55706000000	37219000000	56050000000
YEL054C;YDR418W	40714000000	55256000000	46582000000	39203000000	47594000000	44349000000	47190000000	49483000000	41483000000	37555000000	37603000000	37780000000
YOR312C;YMR242C	44535000000	55937000000	49953000000	37848000000	46238000000	38291000000	44690000000	52664000000	40177000000	36066000000	37316000000	29695000000
YOR027W	37720000000	42095000000	37884000000	43290000000	46137000000	36627000000	40170000000	46283000000	35442000000	32903000000	43744000000	33060000000
YNL069C	35318000000	48542000000	45033000000	35699000000	45334000000	35251000000	37494000000	47049000000	35968000000	31259000000	37359000000	28634000000
YHL015W	92240000000	99129000000	107020000000	32199000000	44777000000	89435000000	42135000000	38080000000	85119000000	80782000000	31700000000	90032000000
YLR048W	44920000000	39981000000	45194000000	45641000000	44693000000	45737000000	51053000000	52319000000	53835000000	44371000000	47552000000	42519000000
YJR121W	38039000000	35959000000	37540000000	43981000000	44191000000	45652000000	18778000000	16813000000	16031000000	24710000000	24769000000	24123000000
YMR143W;YDL083C	49481000000	58094000000	56295000000	34770000000	43645000000	52457000000	43384000000	45564000000	45396000000	40477000000	32217000000	38485000000
YHR010W;YDR471W	78190000000	93204000000	87356000000	38790000000	43574000000	72457000000	55887000000	46750000000	85424000000	73305000000	37382000000	78003000000
YER043C	43085000000	41892000000	43281000000	42076000000	43557000000	41986000000	53452000000	54533000000	54783000000	53822000000	51051000000	53728000000
YCL043C	32036000000	36147000000	30691000000	42271000000	43347000000	36003000000	34548000000	37747000000	28682000000	48185000000	55330000000	49229000000
YPR132W;YGR118W	68297000000	69351000000	77113000000	31342000000	42868000000	73412000000	38808000000	42550000000	73226000000	62347000000	29380000000	63174000000
YPR074C	40315000000	43785000000	42339000000	38749000000	41499000000	39074000000	37390000000	39913000000	39494000000	39491000000	41428000000	41115000000
YOL127W	40515000000	51617000000	40437000000	34488000000	41379000000	38172000000	40092000000	42579000000	30313000000	32098000000	27301000000	29866000000
YHR064C	38489000000	40321000000	39156000000	40430000000	41195000000	35224000000	43415000000	44132000000	40408000000	35455000000	41145000000	34154000000
YNL302C	43872000000	47093000000	49923000000	31203000000	41100000000	44399000000	37121000000	38153000000	41229000000	38500000000	30844000000	39428000000
YJL191W	62636000000	74637000000	57255000000	34073000000	41078000000	53410000000	36807000000	39528000000	41827000000	48725000000	28228000000	42968000000
YML028W	37200000000	33308000000	38244000000	37864000000	40681000000	34538000000	37513000000	37108000000	33501000000	35715000000	40798000000	36098000000
YGL103W	47068000000	54168000000	55522000000	32014000000	40219000000	44676000000	36703000000	39343000000	42022000000	38965000000	27870000000	39197000000
YIL053W	35617000000	40884000000	38457000000	35493000000	39943000000	27457000000	52686000000	55991000000	43961000000	41159000000	52553000000	44956000000
YNL067W	59364000000	69026000000	58362000000	39695000000	39922000000	52464000000	41530000000	48261000000	54287000000	50250000000	32560000000	44945000000
YKL081W	55605000000	48582000000	57279000000	45236000000	39485000000	54609000000	46238000000	44432000000	57588000000	49033000000	40600000000	49948000000
YLR355C	53341000000	51841000000	56148000000	39429000000	38972000000	43743000000	89035000000	86637000000	96030000000	72786000000	61773000000	71902000000
YIL069C;YER074W	53279000000	54661000000	60364000000	26431000000	38816000000	62416000000	36420000000	35448000000	50518000000	49200000000	26569000000	50843000000
YBL030C	34870000000	34423000000	42619000000	35865000000	38716000000	51578000000	16977000000	14079000000	18943000000	25900000000	18960000000	24595000000
YKR059W;YJL138C	48736000000	39901000000	49411000000	37983000000	38294000000	48141000000	38482000000	37844000000	52523000000	42912000000	35500000000	41972000000
YBR121C	43996000000	47576000000	44103000000	36828000000	37547000000	38153000000	35344000000	38096000000	34628000000	34166000000	34439000000	33750000000
YGL189C;YER131W	79488000000	66426000000	105520000000	26311000000	37440000000	81075000000	37418000000	29529000000	87024000000	71701000000	25809000000	67676000000
YHL001W;YKL006W	22990000000	33376000000	28292000000	28521000000	37129000000	24294000000	30932000000	33374000000	21437000000	20600000000	22171000000	16991000000
YBR011C	35891000000	39966000000	38835000000	35372000000	36601000000	31398000000	34429000000	38150000000	34195000000	34505000000	38780000000	34522000000
YDL185W	37055000000	36534000000	37256000000	41081000000	36270000000	37327000000	42110000000	40469000000	42641000000	43101000000	44248000000	44029000000
YBL092W	28783000000	39824000000	29487000000	26992000000	35301000000	34642000000	35158000000	32240000000	26053000000	24747000000	24968000000	24095000000
YGR148C	72663000000	76513000000	74967000000	26660000000	35023000000	63081000000	33885000000	33594000000	62453000000	58134000000	25794000000	59257000000
YDR226W	34560000000	45605000000	38232000000	28111000000	34862000000	33514000000	29195000000	32743000000	27265000000	26268000000	30301000000	27787000000
YNR016C	40456000000	32327000000	40595000000	38991000000	34120000000	45179000000	34307000000	30766000000	39545000000	34545000000	31053000000	34541000000
YDR064W	40530000000	40174000000	45238000000	27660000000	34039000000	40022000000	37679000000	36025000000	36088000000	30676000000	25277000000	25793000000
YFL045C	29941000000	29308000000	28597000000	34258000000	34030000000	29885000000	28943000000	27563000000	27954000000	30840000000	33265000000	30099000000
YGL245W	37349000000	36345000000	37386000000	33754000000	33143000000	39020000000	37950000000	38411000000	39356000000	35882000000	34873000000	36734000000
YOR335C	34092000000	35017000000	34290000000	34772000000	32627000000	33705000000	39581000000	39745000000	39787000000	33575000000	34568000000	34204000000
YGL253W	34443000000	32805000000	33079000000	34214000000	32418000000	28823000000	35933000000	35563000000	34219000000	33184000000	33659000000	31040000000
YGR285C	25700000000	29109000000	25725000000	30223000000	31996000000	21714000000	32291000000	32034000000	25184000000	21989000000	26996000000	21458000000
YGR159C	44565000000	52508000000	44443000000	26120000000	31797000000	34739000000	36052000000	39095000000	47435000000	37027000000	26771000000	35829000000
YDL075W	29548000000	33259000000	24836000000	21236000000	31227000000	29677000000	26753000000	23046000000	21292000000	22856000000	21361000000	24614000000
YDL014W	30580000000	36986000000	35197000000	28862000000	30867000000	27647000000	33235000000	34940000000	30840000000	26269000000	29352000000	27588000000
YML024W;YDR447C	35675000000	43693000000	44428000000	23956000000	30700000000	42619000000	29977000000	30134000000	31856000000	34828000000	28129000000	35163000000
YOR204W	36265000000	34330000000	36043000000	30885000000	30670000000	32640000000	36353000000	33838000000	34492000000	29061000000	28431000000	27886000000
YGL105W	30552000000	36134000000	29700000000	27843000000	30462000000	25984000000	27807000000	30873000000	26630000000	25041000000	27655000000	27361000000
YOL109W	19200000000	23133000000	45920000000	17564000000	30057000000	68896000000	21034000000	18746000000	44556000000	29481000000	22074000000	36403000000
YBR025C	33741000000	31828000000	34805000000	32681000000	29789000000	34382000000	35799000000	34194000000	37699000000	31377000000	31798000000	31462000000
YML126C	36603000000	34272000000	37333000000	31845000000	28618000000	30095000000	46688000000	49055000000	51940000000	44733000000	42190000000	43081000000
YAL012W	27883000000	26386000000	28946000000	30397000000	28597000000	28010000000	29027000000	28062000000	27837000000	28323000000	31078000000	28447000000
YPL160W	30255000000	30592000000	29480000000	30130000000	28346000000	30932000000	31234000000	31216000000	31853000000	28932000000	27908000000	30173000000
YLR058C	36722000000	36850000000	35888000000	28702000000	26789000000	32799000000	47524000000	48714000000	56186000000	46762000000	41767000000	46965000000
YLR109W	31521000000	33713000000	34682000000	25757000000	26707000000	27893000000	36746000000	38628000000	43942000000	41201000000	30459000000	33678000000
YBR127C	28844000000	30557000000	30221000000	24266000000	26639000000	24870000000	26132000000	27606000000	27193000000	25671000000	26839000000	25864000000
YLR367W;YJL190C	33367000000	50427000000	32819000000	27041000000	26493000000	26740000000	28738000000	36063000000	28266000000	31036000000	20821000000	24123000000
YPL028W	26929000000	28692000000	27381000000	26506000000	26478000000	21646000000	39198000000	42738000000	35075000000	32944000000	37208000000	32821000000
YLR333C;YGR027C	34379000000	40167000000	31951000000	20515000000	26324000000	41283000000	25935000000	23451000000	25198000000	30812000000	21756000000	29461000000
YLR197W	30970000000	32568000000	32182000000	27378000000	26276000000	29859000000	46126000000	47837000000	48951000000	39574000000	36498000000	37828000000
YGR094W	26200000000	25868000000	26718000000	26838000000	26063000000	25250000000	25192000000	24725000000	25232000000	22084000000	23468000000	22239000000
YML063W	25419000000	29570000000	28549000000	22605000000	25966000000	27581000000	18096000000	20075000000	19168000000	16388000000	16238000000	17944000000
YGR254W	18574000000	22109000000	22045000000	24600000000	25674000000	25198000000	16809000000	13516000000	10905000000	19675000000	18443000000	19057000000
YMR205C	29716000000	28197000000	30319000000	25263000000	25354000000	29227000000	29544000000	30637000000	33996000000	30171000000	26338000000	30921000000
YDL126C	23611000000	24338000000	24101000000	23702000000	25071000000	25275000000	22650000000	24304000000	24777000000	27514000000	26969000000	29751000000
YAL035W	26818000000	27546000000	26028000000	25427000000	24883000000	23735000000	27302000000	28341000000	27152000000	24901000000	25409000000	24797000000
YLR293C	24906000000	27843000000	24803000000	23842000000	24631000000	25069000000	49807000000	49653000000	47268000000	43034000000	43715000000	44203000000
YDR037W	22971000000	22980000000	22641000000	29482000000	24485000000	24046000000	33478000000	32326000000	31376000000	26346000000	31649000000	27224000000
YOR375C	22381000000	19352000000	21753000000	28121000000	24367000000	28948000000	23667000000	22066000000	24191000000	27772000000	27602000000	28726000000
YGR240C	29175000000	24114000000	28287000000	27125000000	24256000000	28395000000	30512000000	27719000000	32468000000	28835000000	26248000000	28954000000
YNL055C	18270000000	16685000000	18686000000	23240000000	24162000000	22139000000	10360000000	8664800000	8156100000	16044000000	14381000000	14725000000
YJL159W	20093000000	24975000000	20366000000	22367000000	23886000000	22371000000	22386000000	25131000000	21488000000	31849000000	36403000000	34694000000
YGL148W	20952000000	21385000000	19865000000	22860000000	23870000000	17930000000	21502000000	21666000000	18276000000	17291000000	20563000000	17550000000
YDR099W	16735000000	13553000000	17742000000	26195000000	23863000000	22144000000	20537000000	21575000000	19667000000	20487000000	25577000000	20078000000
YBL075C	23052000000	19590000000	18174000000	36590000000	23754000000	24851000000	9845000000	6926200000	6423400000	6113800000	6145100000	10316000000
YNL096C	19072000000	25222000000	22277000000	19152000000	23184000000	19703000000	20010000000	22517000000	16938000000	14666000000	17462000000	14449000000
YMR217W	27565000000	23793000000	26934000000	27466000000	22885000000	26318000000	30386000000	28098000000	30067000000	23856000000	26522000000	25108000000
YGR034W;YLR344W	17375000000	19501000000	17076000000	16838000000	22705000000	19779000000	18227000000	18149000000	14188000000	14828000000	14724000000	14637000000
YBR078W	17936000000	21035000000	19896000000	20708000000	22522000000	19029000000	16625000000	18583000000	15644000000	18873000000	22637000000	19006000000
YBR249C	21121000000	22007000000	21669000000	23017000000	22071000000	21052000000	24965000000	25237000000	24877000000	20373000000	21474000000	21059000000
YDR023W	22822000000	21626000000	23332000000	23085000000	21863000000	21587000000	26257000000	24901000000	25766000000	22133000000	23720000000	22543000000
YLL045C	19036000000	24599000000	19442000000	18945000000	21802000000	17385000000	27143000000	35246000000	23540000000	19821000000	24972000000	22194000000
YJR105W	24234000000	26963000000	23804000000	22752000000	21796000000	22247000000	26703000000	27047000000	25008000000	22589000000	24002000000	22550000000
YPR043W;YJR094W-A	51402000000	58552000000	51181000000	13830000000	21494000000	48607000000	27060000000	24112000000	45620000000	45164000000	19681000000	49195000000
YDL081C	25397000000	22418000000	24027000000	10054000000	21350000000	24870000000	18801000000	17742000000	20770000000	16462000000	15085000000	21288000000
YHR020W	22876000000	20643000000	23734000000	22676000000	21236000000	23153000000	27301000000	27591000000	28269000000	24512000000	25121000000	24765000000
YMR194W	20968000000	24742000000	21045000000	16512000000	20961000000	24012000000	20003000000	20111000000	16043000000	19091000000	19617000000	21622000000
YLR354C	22353000000	19662000000	22081000000	20242000000	20863000000	24529000000	27662000000	25883000000	32702000000	34890000000	31642000000	39192000000
YLR153C	28069000000	26011000000	29276000000	22127000000	20289000000	25689000000	55958000000	54382000000	68231000000	54304000000	48306000000	53286000000
YOR369C	26935000000	28488000000	24634000000	19886000000	20183000000	24048000000	21054000000	21639000000	21934000000	21643000000	19394000000	21094000000
YDL191W;YDL136W	13472000000	20205000000	15199000000	14945000000	20090000000	20029000000	17192000000	17563000000	11813000000	11714000000	11824000000	12356000000
YER117W;YBL087C	25418000000	26596000000	30898000000	14713000000	19716000000	27927000000	19892000000	19614000000	23460000000	24877000000	14912000000	25480000000
YGR162W	19350000000	21145000000	19309000000	19915000000	19386000000	17053000000	18856000000	19240000000	17648000000	15878000000	18630000000	16355000000
YJR139C	23252000000	19022000000	21957000000	20492000000	19198000000	24206000000	22280000000	21114000000	25232000000	23351000000	21574000000	25751000000
YPL143W	59005000000	61125000000	66721000000	16590000000	19118000000	56891000000	23666000000	24047000000	55886000000	53049000000	17933000000	52048000000
YFL018C	14986000000	16302000000	14691000000	16434000000	18544000000	15869000000	9420100000	9181900000	8339900000	10899000000	11007000000	11076000000
YBR263W	18848000000	20300000000	19799000000	18625000000	18524000000	18639000000	17363000000	16359000000	17331000000	18594000000	18208000000	17251000000
YKR057W	37840000000	44121000000	31683000000	14951000000	18286000000	27982000000	20670000000	20750000000	23648000000	29767000000	17357000000	27510000000
YMR229C	20944000000	18380000000	20538000000	20268000000	18231000000	20177000000	21114000000	19597000000	21158000000	17270000000	17622000000	18061000000
YPR163C	22838000000	26555000000	23221000000	16073000000	18178000000	18152000000	18556000000	21963000000	21334000000	17906000000	18073000000	19172000000
YCR053W	19051000000	16573000000	17745000000	21052000000	18000000000	15821000000	23176000000	21382000000	20059000000	18980000000	20209000000	18845000000
YBL039C	19962000000	16346000000	20615000000	21299000000	17587000000	18045000000	28835000000	26762000000	28858000000	23028000000	25260000000	22217000000
YKL054C	16436000000	19507000000	15960000000	16590000000	17259000000	14118000000	16033000000	18175000000	13707000000	13117000000	15241000000	13059000000
YPR191W	13358000000	16179000000	14035000000	16116000000	17246000000	14991000000	7461100000	7903700000	6475800000	10558000000	10689000000	9929400000
YHR183W	22267000000	18033000000	23401000000	18466000000	17060000000	22298000000	14404000000	13712000000	18595000000	20745000000	17407000000	20856000000
YJR104C	37066000000	41319000000	40561000000	13294000000	17056000000	32783000000	19630000000	20327000000	33899000000	28369000000	14112000000	29678000000
YML073C	25678000000	32426000000	32453000000	11701000000	16972000000	23709000000	12374000000	13230000000	16824000000	14661000000	10145000000	15202000000
YNL121C	14186000000	16837000000	14278000000	16706000000	16897000000	15661000000	10547000000	10538000000	9501100000	10996000000	12564000000	10882000000
YDR158W	15086000000	15168000000	14609000000	18510000000	16767000000	16627000000	18313000000	17790000000	18115000000	16492000000	17540000000	18006000000
YLL018C	20529000000	16889000000	20960000000	17888000000	16738000000	19726000000	34894000000	34753000000	40342000000	37161000000	31579000000	36781000000
YPR028W	13691000000	15857000000	13613000000	15018000000	16533000000	15778000000	16319000000	16471000000	13875000000	16467000000	15939000000	17279000000
YGR086C	14775000000	14613000000	13543000000	16896000000	16506000000	16003000000	9605300000	9637700000	8813000000	11402000000	11945000000	11974000000
YDR172W	16325000000	17450000000	15994000000	16092000000	16292000000	16574000000	17963000000	18903000000	18345000000	16567000000	17454000000	16649000000
YHL034C	13592000000	18496000000	16220000000	12159000000	16239000000	13345000000	13292000000	15225000000	13757000000	15172000000	14724000000	15061000000
YJL167W	17564000000	18460000000	17159000000	15624000000	16071000000	15089000000	16857000000	18224000000	17051000000	19491000000	19505000000	19830000000
YDR091C	21687000000	20397000000	22219000000	16334000000	16059000000	20343000000	18945000000	18929000000	25378000000	20902000000	17134000000	20779000000
YMR307W	16769000000	16806000000	17179000000	15575000000	15985000000	13367000000	11738000000	13240000000	11985000000	13480000000	13477000000	13658000000
YMR108W	16978000000	18674000000	17668000000	17009000000	15940000000	15822000000	17701000000	17503000000	17649000000	15685000000	16190000000	16903000000
YOR310C	20182000000	15656000000	18831000000	18302000000	15883000000	18511000000	21142000000	19253000000	21386000000	18351000000	17256000000	17957000000
YAL005C	13676000000	15480000000	12446000000	17060000000	15853000000	13031000000	11973000000	12885000000	10089000000	11354000000	14660000000	11029000000
YMR145C	12968000000	12752000000	14614000000	15815000000	15785000000	16228000000	4631300000	4356100000	4699300000	7201500000	6541200000	6206600000
YNL112W	16999000000	17396000000	15905000000	14477000000	15719000000	12627000000	27266000000	28424000000	23027000000	16844000000	20388000000	16897000000
YKL156W;YHR021C	44549000000	38458000000	47831000000	15567000000	15680000000	44734000000	20311000000	17896000000	37194000000	35156000000	18225000000	33920000000
YLR175W	19645000000	17831000000	17958000000	17430000000	15646000000	17575000000	23553000000	24470000000	25798000000	20464000000	18776000000	22109000000
YBR106W	12055000000	11885000000	12361000000	16209000000	15578000000	13862000000	14626000000	14540000000	13114000000	14793000000	14522000000	15198000000
YLR060W	15894000000	14739000000	15263000000	16844000000	15547000000	15465000000	30554000000	31318000000	32926000000	26825000000	30968000000	26687000000
YGR185C	17283000000	17756000000	17641000000	14949000000	15534000000	16461000000	17582000000	18560000000	18789000000	15786000000	15743000000	16380000000
YER110C	16418000000	14136000000	17037000000	16310000000	15268000000	16351000000	19487000000	17045000000	20505000000	15351000000	16444000000	15338000000
YKL085W	10733000000	12473000000	10881000000	13518000000	15215000000	12837000000	7074100000	6926700000	5101500000	8078300000	8385400000	6921900000
YNL071W	13554000000	14005000000	12196000000	14525000000	15166000000	12885000000	9733500000	10152000000	8551000000	10919000000	12145000000	10270000000
YDR233C	15118000000	14196000000	14720000000	16115000000	14994000000	12983000000	13451000000	13703000000	12985000000	14973000000	14407000000	14178000000
YDR353W	13815000000	15745000000	13522000000	13891000000	14891000000	12470000000	10188000000	11869000000	9314000000	10452000000	11662000000	9990800000
YCR088W	12331000000	14880000000	12723000000	12918000000	14787000000	12656000000	9393900000	11052000000	9140200000	11355000000	13330000000	12993000000
YML056C	18848000000	17506000000	19354000000	15290000000	14645000000	16869000000	19916000000	17553000000	22774000000	17996000000	16419000000	19377000000
YBR084W	15959000000	17120000000	15990000000	14413000000	14599000000	15295000000	12974000000	13012000000	13347000000	12490000000	12806000000	12686000000
YOR187W	11055000000	11325000000	11370000000	14742000000	14597000000	15042000000	5558800000	5331000000	5329300000	8521500000	8927100000	7934100000
YOR168W	16821000000	16545000000	16329000000	14790000000	14578000000	14905000000	16965000000	18099000000	17133000000	15595000000	14643000000	15064000000
YOR341W	17261000000	16510000000	17043000000	16702000000	14549000000	15787000000	19757000000	18766000000	19578000000	15322000000	16576000000	16022000000
YJL130C	16947000000	12988000000	15910000000	17460000000	14478000000	19218000000	15856000000	13198000000	17550000000	17815000000	15657000000	18297000000
YKL096W	3610300000	4898600000	3045700000	15676000000	14469000000	8084900000	2623800000	3059500000	1440600000	12482000000	18191000000	12926000000
YDL084W	12569000000	12014000000	12012000000	14988000000	14439000000	12979000000	13071000000	12658000000	12019000000	10923000000	13675000000	10736000000
YBL045C	15695000000	13094000000	16454000000	14880000000	14241000000	19596000000	6982200000	6338500000	7962800000	11825000000	8602100000	10753000000
YJR070C	14229000000	14817000000	12572000000	14960000000	14232000000	9999400000	22390000000	20857000000	14473000000	12352000000	15922000000	12039000000
YML008C	16318000000	15666000000	17125000000	15684000000	14091000000	16306000000	21344000000	20806000000	24705000000	21446000000	20174000000	21760000000
YPR041W	12172000000	13249000000	11733000000	13778000000	14084000000	11259000000	15635000000	16218000000	12843000000	11870000000	14268000000	12373000000
YIL169C	15798000000	18978000000	17600000000	14115000000	13638000000	15253000000	9713200000	10074000000	12659000000	15018000000	12869000000	16058000000
YHR193C	16250000000	16624000000	15024000000	10857000000	13541000000	15151000000	14177000000	12704000000	15884000000	15028000000	10701000000	13663000000
YER036C	15868000000	13173000000	15971000000	14787000000	13410000000	14606000000	19321000000	18172000000	18581000000	15174000000	14714000000	15542000000
YLR216C	10441000000	12340000000	10578000000	14061000000	13381000000	10882000000	24233000000	26497000000	19915000000	18896000000	24950000000	20271000000
YEL026W	7486500000	14392000000	10478000000	9647500000	13261000000	8305200000	12733000000	15541000000	9325200000	7051700000	8990200000	6245600000
YOR007C	10734000000	12710000000	11743000000	11420000000	13254000000	10462000000	13895000000	15898000000	13051000000	11565000000	13446000000	11949000000
YIL078W	17563000000	14504000000	18071000000	15561000000	13103000000	17811000000	18314000000	16565000000	23017000000	17703000000	16760000000	19213000000
YOR153W	9882000000	9909700000	9109300000	13963000000	13091000000	11573000000	8861000000	9108600000	7784600000	11017000000	14613000000	13354000000
YBL076C	16792000000	13541000000	17457000000	15470000000	12955000000	17212000000	17361000000	15986000000	20000000000	17078000000	16293000000	17867000000
YIL041W	9505300000	9942200000	9859700000	12109000000	12920000000	9826500000	9407100000	9565000000	7837800000	9946200000	11484000000	8616700000
YKL104C	6617900000	6028300000	6336300000	13764000000	12574000000	12186000000	7032800000	6802600000	7244800000	18705000000	18749000000	19373000000
YGR204W	13181000000	12187000000	12483000000	13174000000	12281000000	12691000000	11233000000	11691000000	11083000000	11236000000	12109000000	11135000000
YHR179W	13805000000	13895000000	14009000000	12598000000	12276000000	10374000000	18251000000	20969000000	19799000000	18977000000	20229000000	19790000000
YBL002W	18002000000	19509000000	16214000000	10682000000	12168000000	17916000000	10970000000	9952500000	11520000000	11671000000	7510400000	10928000000
YER091C	10610000000	9305700000	10754000000	13526000000	12162000000	14103000000	12976000000	12343000000	15775000000	15423000000	14253000000	17842000000
YBR286W	13978000000	15111000000	13399000000	11885000000	12099000000	11113000000	10940000000	11677000000	11900000000	11532000000	11871000000	11817000000
YFL022C	13200000000	12355000000	13139000000	12826000000	12082000000	12392000000	13757000000	13448000000	14256000000	12885000000	13501000000	12968000000
YCL037C	13822000000	14687000000	13641000000	11729000000	12051000000	10155000000	12300000000	13040000000	10672000000	9002700000	10664000000	9010400000
YOR182C;YLR287C-A	15790000000	14766000000	21681000000	8612500000	12041000000	22365000000	11708000000	9122000000	15297000000	14017000000	9312400000	16969000000
YLR167W	20151000000	27632000000	20172000000	14879000000	12005000000	20469000000	13830000000	13578000000	20206000000	19726000000	13381000000	18438000000
YPL004C	9095500000	10526000000	9557500000	12858000000	11892000000	11522000000	6432600000	5981800000	5278900000	7143200000	8731100000	6981500000
YER025W	14522000000	12949000000	16081000000	13457000000	11806000000	15098000000	13702000000	14621000000	17696000000	14397000000	13915000000	14426000000
YBR143C	10131000000	8626000000	9723000000	12467000000	11778000000	10907000000	12683000000	11948000000	11130000000	10240000000	12276000000	10434000000
YNL079C	19138000000	19177000000	23919000000	8313900000	11626000000	20677000000	8925800000	8260800000	19530000000	25059000000	8931200000	26790000000
YHR019C	12497000000	12642000000	12577000000	11876000000	11625000000	12080000000	11352000000	10841000000	11861000000	11975000000	11205000000	11216000000
YGL234W	15678000000	13130000000	15392000000	13256000000	11589000000	15513000000	13627000000	13324000000	16274000000	12929000000	12266000000	13829000000
YOL139C	12060000000	12691000000	13800000000	9255900000	11583000000	13271000000	10485000000	11284000000	13585000000	10745000000	9002200000	11893000000
YJR009C	16032000000	12899000000	17439000000	11469000000	11577000000	13923000000	13899000000	14909000000	22059000000	17840000000	13926000000	18365000000
YNL064C	11471000000	13435000000	12130000000	11152000000	11541000000	10168000000	13321000000	14470000000	12153000000	10829000000	12544000000	11432000000
YMR012W	12554000000	11386000000	13029000000	12119000000	11519000000	14699000000	8583400000	8275300000	9735300000	9737300000	9112600000	10166000000
YGR282C	8972400000	9365000000	9237700000	11560000000	11513000000	12371000000	7819600000	7221800000	8631900000	14176000000	10107000000	14361000000
YDR382W	20110000000	19710000000	25456000000	9404900000	11512000000	20577000000	13492000000	12043000000	21502000000	16764000000	11059000000	17473000000
YOR332W	7941000000	11285000000	9882800000	8990300000	11482000000	8053800000	11757000000	13574000000	9371500000	8507300000	11488000000	8334400000
YOR323C	11389000000	11841000000	11465000000	12070000000	11279000000	10624000000	12568000000	12231000000	11518000000	11590000000	11935000000	10946000000
YBR218C	12365000000	10888000000	12949000000	11841000000	11219000000	15388000000	10086000000	9874800000	13368000000	11753000000	9923300000	12586000000
YER120W	10092000000	10710000000	9713100000	10273000000	11216000000	9877900000	9861600000	10578000000	9067000000	8457500000	9376300000	8843200000
YDR298C	6404900000	7983400000	7718400000	9881300000	11180000000	8326300000	5197600000	5060100000	3892500000	4775200000	6113500000	4094000000
YBL024W	10980000000	11347000000	11553000000	11641000000	11124000000	9632000000	12551000000	12258000000	11181000000	9362800000	10708000000	9157800000
YLR429W	10111000000	12314000000	9700500000	10726000000	11122000000	9022800000	18508000000	20218000000	16174000000	15337000000	19189000000	15532000000
YFR044C	9840700000	11824000000	10603000000	10512000000	11119000000	10124000000	8351600000	8944200000	7722200000	10579000000	11261000000	10582000000
YDR129C	9279800000	9689500000	10301000000	10701000000	11101000000	10640000000	11274000000	11466000000	11475000000	11666000000	13089000000	12402000000
YDR432W	11709000000	13006000000	11707000000	10692000000	10994000000	10672000000	11072000000	11440000000	10809000000	10168000000	10554000000	9616900000
YFR053C	11187000000	9759300000	11580000000	11999000000	10780000000	11716000000	16960000000	15471000000	15863000000	9079700000	7549300000	9700900000
YOR361C	12018000000	10733000000	11649000000	12734000000	10754000000	12231000000	12609000000	11550000000	12399000000	12530000000	12181000000	11804000000
YIL052C;YER056C-A	29936000000	24996000000	32105000000	9406000000	10728000000	30721000000	13354000000	10812000000	28925000000	28315000000	9167300000	24460000000
YOR374W	6844000000	6612800000	7167000000	12041000000	10668000000	12091000000	5181700000	4605600000	4925900000	6570200000	5332000000	5739500000
YER003C	10374000000	11720000000	9569300000	9480200000	10577000000	8794200000	7674300000	8030300000	7036900000	9733300000	10027000000	10620000000
YGR061C	13292000000	12285000000	13267000000	12007000000	10543000000	12466000000	11042000000	10035000000	11679000000	10486000000	9529600000	9913500000
YDR225W;YBL003C	5720500000	10498000000	7976800000	7231200000	10511000000	6396900000	6936000000	7373200000	5018800000	4904600000	4801900000	3264800000
YJL041W	8856600000	10590000000	8877200000	9034500000	10498000000	8110100000	8594200000	9726200000	7296400000	8139500000	9341400000	8272300000
YBR039W	7114100000	9166600000	8274900000	9664300000	10342000000	9387400000	3907800000	4123600000	3323000000	4743400000	5692700000	4758000000
YLL026W	7561900000	8875400000	7645600000	9761600000	10229000000	9207200000	12334000000	12572000000	10532000000	12695000000	14288000000	13485000000
YKL210W	11100000000	10275000000	10849000000	11223000000	10211000000	10876000000	10494000000	9850300000	10344000000	11038000000	10971000000	11219000000
YPL037C	10223000000	10016000000	10767000000	6809100000	10210000000	11547000000	9325300000	10021000000	8617800000	9824500000	7435600000	10781000000
YPL226W	12330000000	11008000000	12295000000	11618000000	10195000000	11740000000	11152000000	10451000000	12238000000	10333000000	10583000000	10289000000
YDL195W	9260800000	9270600000	8707000000	10922000000	10179000000	9204600000	8776100000	9183500000	7965700000	8377300000	9810100000	8046700000
YGL202W	10469000000	10534000000	10692000000	9453000000	10077000000	11212000000	11815000000	11574000000	13952000000	11833000000	11182000000	12936000000
YOR293W	9215500000	16294000000	11123000000	8212700000	10015000000	7244400000	7098600000	8913600000	7261100000	5386000000	5115300000	5913700000
YDL171C	13282000000	11798000000	13190000000	11019000000	9993500000	11999000000	12401000000	11744000000	14534000000	11782000000	10352000000	12867000000
YKR001C	9276700000	9524900000	9664500000	10648000000	9867900000	10229000000	9048200000	8756800000	8554700000	9292400000	10006000000	10075000000
YNL037C	7912100000	8570200000	8851200000	9537700000	9841300000	9068100000	4250000000	4046000000	3484100000	4752500000	4511000000	5078700000
YDL066W	9323300000	10028000000	8710100000	10703000000	9708400000	10003000000	6363200000	5279200000	5600500000	7568400000	7238500000	7648000000
YOL039W	14918000000	14701000000	13972000000	6882300000	9578300000	11075000000	11859000000	9795300000	10976000000	11634000000	10085000000	13100000000
YDR454C	12692000000	14520000000	13212000000	7566300000	9454000000	11128000000	8981600000	9460500000	10334000000	9276500000	7330500000	9400500000
YJL014W	9765100000	9204600000	9646800000	10545000000	9414600000	9347000000	11930000000	11153000000	11766000000	10189000000	11164000000	10358000000
YNL010W	7613200000	7231900000	7273700000	9010200000	9398500000	7409800000	8536600000	8404000000	7513300000	6678800000	8927900000	7384500000
YGR124W	11815000000	10066000000	12270000000	9369500000	9385000000	12195000000	10774000000	9389200000	13410000000	12879000000	10973000000	12244000000
YKL029C	14648000000	13913000000	15434000000	9523600000	9375200000	12727000000	16564000000	15697000000	21148000000	14074000000	11369000000	15479000000
YMR146C	9763400000	7029500000	9383800000	10857000000	9362100000	12043000000	11035000000	10357000000	11990000000	10344000000	10937000000	10960000000
YOL041C	9599000000	11715000000	9098300000	9388000000	9322800000	7498200000	11503000000	12802000000	9897000000	8180000000	10004000000	8735400000
YJR048W	7658600000	10641000000	8349100000	6933800000	9225100000	6565600000	5963800000	6841100000	5089900000	5694800000	5572600000	5277500000
YJR016C	11391000000	11136000000	11199000000	9446500000	9082400000	9445500000	10727000000	10614000000	11323000000	9272200000	9324800000	9193700000
YLR027C	7629200000	6932000000	7881900000	9565500000	9079500000	8716400000	14477000000	14840000000	14197000000	13635000000	16990000000	14297000000
YGL009C	9528500000	9438800000	9540400000	9303300000	9073100000	8929900000	11474000000	11667000000	11833000000	9992800000	10298000000	11093000000
YDL061C	5427300000	9018400000	5664400000	6808900000	9048100000	6138900000	3172800000	2849100000	1938100000	2097800000	3894400000	2054100000
YGR175C	10529000000	10719000000	10369000000	10268000000	9034100000	8331800000	21282000000	21958000000	21554000000	14080000000	17022000000	16168000000
YDR002W	12883000000	12506000000	14077000000	8038100000	9023900000	13279000000	10672000000	10974000000	13405000000	11963000000	7573500000	12350000000
YNR043W	10405000000	9873200000	10476000000	9926200000	9010800000	9113400000	13597000000	13697000000	13600000000	12261000000	12462000000	11503000000
YEL031W	8572500000	6806000000	7715800000	9693900000	8941300000	8405700000	8027900000	7455500000	7604600000	8174300000	9565400000	9002600000
YOR298C-A	14847000000	14562000000	15438000000	6611700000	8940900000	13999000000	12940000000	11835000000	17454000000	16449000000	9318800000	15286000000
YOR167C;YLR264W	10775000000	14597000000	8475900000	7555900000	8919500000	7694200000	7276500000	9463500000	7654800000	8963700000	8713600000	8442900000
YGR103W	8854900000	8583000000	9552600000	9089000000	8811800000	8373000000	10826000000	11131000000	11291000000	8806700000	9823800000	8724800000
YER006W	7432700000	9119700000	7061600000	8517500000	8699100000	6512400000	11960000000	13457000000	9621600000	8029300000	9911200000	8160400000
YPL237W	8992700000	9276600000	8257300000	8824700000	8689300000	7230700000	9713200000	9361000000	8472400000	7782700000	7726600000	7493700000
YBL047C	6167600000	7430800000	5968900000	8373400000	8662300000	6855700000	5694900000	6266900000	4661700000	5809300000	6850400000	5870300000
YNL162W;YHR141C	16279000000	22533000000	19067000000	5908200000	8659600000	17915000000	8425500000	7065900000	19392000000	15097000000	6087200000	16986000000
YDR342C	3153800000	3168200000	2675500000	9104000000	8616300000	8573400000	2932100000	2796600000	2951100000	5403800000	6405100000	6389600000
YLR185W	29156000000	23032000000	34535000000	6142600000	8613300000	29897000000	13666000000	11667000000	33175000000	29351000000	11505000000	31367000000
YGR264C	9881200000	8145500000	10330000000	10798000000	8592500000	11366000000	11307000000	10206000000	13887000000	11013000000	10570000000	12560000000
YLR325C	6351900000	8652000000	5254400000	7351700000	8576800000	4785600000	5910100000	5885300000	3822400000	4734400000	6691500000	4192300000
YMR031C	6499900000	8495500000	6534900000	7351500000	8403700000	6606700000	4137700000	4600200000	3212800000	3751900000	4659600000	3566900000
YPL093W	8530300000	8934900000	9221500000	8085800000	8261500000	7879500000	9360800000	9090000000	10532000000	8319100000	8309800000	8149700000
YOL097C	9277400000	9052900000	8833700000	8631700000	8220600000	8652100000	10132000000	10646000000	10114000000	9064500000	9216200000	9160200000
YGL078C	8772300000	10375000000	9203800000	8581500000	8205000000	7604700000	11799000000	11648000000	10481000000	8619200000	9227500000	8511000000
YDR381W	10015000000	11027000000	10590000000	6425300000	8167500000	10057000000	7663900000	8193500000	10302000000	10719000000	6683400000	10101000000
YLR335W	7410600000	8696000000	7265600000	7789600000	8153100000	6328200000	12296000000	13956000000	11022000000	10309000000	13214000000	10416000000
YNL247W	7899900000	7659900000	7788100000	8540400000	8070400000	7725400000	8793200000	8428200000	8451600000	7219400000	8402500000	7573700000
YIL142W	8730100000	8823800000	8420000000	8274900000	7959800000	8578100000	10210000000	9526500000	9078500000	8583100000	9059500000	8854300000
YMR120C	10830000000	11066000000	10824000000	8101900000	7703300000	8708400000	6881000000	6776700000	7627000000	5747500000	5753600000	6097300000
YDR127W	6994400000	5570000000	7295100000	9381600000	7656600000	9797500000	7049800000	6487800000	8159000000	8378300000	7496100000	8656500000
YGL055W	6559500000	6236100000	6971300000	6945700000	7645000000	6636900000	8301400000	7884400000	8219300000	6427500000	8338000000	7125100000
YNL061W	7946000000	9092500000	7894500000	7722000000	7571400000	6675500000	9455500000	9812800000	9139100000	7402500000	7342900000	7068600000
YGL026C	8568300000	8113800000	8131100000	8502400000	7522800000	8507000000	9468900000	9411100000	10623000000	10710000000	10191000000	11314000000
YHR128W	6672400000	6412600000	6480900000	8104600000	7515200000	6868400000	9474500000	8358300000	8254800000	7660900000	9169400000	7175700000
YMR183C	5732800000	6981800000	5109700000	6857500000	7499300000	4746900000	5588400000	5773500000	4040400000	4453800000	5929500000	4454100000
YOR117W	6652400000	7927400000	7148300000	7312000000	7418100000	6223400000	8075400000	8496200000	7145600000	7095700000	9032900000	7514700000
YIL022W	5341700000	6636100000	5299700000	7142200000	7395600000	5754800000	4324500000	4621500000	3473100000	4158700000	5263100000	4455300000
YHR052W	6777800000	6929000000	6636400000	7674500000	7387600000	6559700000	10350000000	10604000000	8049000000	6671000000	8192700000	6960700000
YKL035W	10531000000	9739500000	11027000000	8054800000	7343700000	10506000000	6345600000	5856300000	7885700000	8077000000	7179900000	8987700000
YPR033C	8844600000	7628300000	8686500000	7679200000	7309300000	8036400000	8917200000	8228500000	9525400000	7764800000	8127200000	8942300000
YKL172W	10833000000	12764000000	10265000000	5950500000	7295800000	8427900000	8283600000	9066100000	10708000000	8167400000	6216200000	9218600000
YNL209W	5089700000	7051900000	4640000000	5283000000	7274100000	2987000000	6165800000	7112700000	6479200000	4254800000	7132500000	3151500000
YLR432W	6966600000	7546300000	7559600000	6534500000	7244300000	7136000000	12584000000	12986000000	12024000000	11059000000	11242000000	12380000000
YPR183W	7608400000	6838900000	7563500000	7134200000	7234900000	7756800000	7285500000	7350700000	8145000000	9795400000	8637700000	10639000000
YPL043W	5853400000	7044700000	5868800000	6714300000	7223100000	4607300000	8071000000	8610200000	6275700000	5199900000	6336400000	5208900000
YDR150W	5858300000	6410900000	5708100000	7269500000	7202900000	5748600000	6195700000	6443900000	5177900000	5237300000	6880400000	5059700000
YPR110C	8141500000	8813900000	7726600000	7354300000	7177600000	6646300000	9522000000	9336700000	8981900000	7197300000	8240900000	6706400000
YAL023C	5924300000	5933700000	5487100000	7233700000	7176200000	6169000000	6125100000	6157500000	5092400000	5599200000	7259100000	6817000000
YLR303W	4027700000	3748600000	3968000000	7042100000	7036000000	6595700000	4803100000	5236100000	5973200000	10599000000	9835900000	11370000000
YKL196C	5100700000	5576400000	5450200000	6988100000	7002500000	5430900000	6378800000	6877700000	5472300000	5687100000	6878800000	5810000000
YMR309C	6917100000	6767600000	7045100000	7470000000	6965100000	8127200000	7063900000	7059800000	7640500000	7291900000	7140700000	7988400000
YGR178C	6353200000	7350600000	6338900000	6827200000	6947100000	5654700000	5364600000	5721900000	4501000000	5040800000	5957800000	4998300000
YDL143W	7069400000	6761900000	7532200000	8269000000	6945000000	7614900000	7783000000	7997400000	8513000000	6859100000	7697600000	7657100000
YNL098C	5721100000	6250500000	5591600000	5954000000	6938300000	5657800000	3803000000	4265200000	3495900000	4185200000	5124500000	4257700000
YLR192C	8411300000	8429300000	10536000000	5943500000	6928100000	8387600000	14707000000	14407000000	17948000000	16049000000	12090000000	16403000000
YCL050C	7245900000	8022800000	8207500000	7453100000	6888300000	7484900000	9932500000	10002000000	10338000000	8957900000	9445800000	9989400000
YGR211W	6090100000	6405600000	5533000000	7363000000	6878500000	5429000000	9399600000	9861900000	8435300000	6702800000	8276000000	6539700000
YIL051C	5394100000	7457100000	6651700000	5397800000	6853300000	6064900000	8793100000	9550100000	7460200000	6273800000	7199300000	6142400000
YPL145C	6556000000	6701200000	6400000000	7504700000	6847400000	6273700000	6930900000	6681600000	6294800000	6493200000	7555100000	6679300000
YPL048W	9406400000	7132000000	9930500000	8451300000	6825500000	9981800000	7684700000	6809200000	9406600000	10417000000	7797500000	9767700000
YGL206C	8580300000	6361000000	8807400000	8366900000	6824300000	10253000000	6452500000	5611400000	8150200000	8510700000	7359000000	8772000000
YPL078C	4749500000	4091100000	5250700000	6904900000	6816800000	6955000000	3085400000	3026400000	2612100000	3818000000	3983500000	3445800000
YJL008C	7482400000	6525800000	7589700000	7952500000	6811500000	8317300000	8322500000	7794100000	9662100000	8340400000	8257100000	8461400000
YER178W	8163800000	8672500000	8829000000	7137200000	6807400000	7690300000	5811000000	6022000000	6673900000	6648200000	6017100000	6696300000
YJR064W	5877600000	6193500000	5923700000	7465700000	6797000000	6108700000	7752000000	7773000000	7009700000	6003300000	7617900000	6476400000
YNR001C	5563900000	5135900000	6263800000	7599600000	6788000000	8732800000	3532400000	2748100000	3345200000	5579000000	4145600000	4715400000
YJL052W	8338600000	5812700000	6452400000	7515500000	6763100000	7161000000	8155800000	4997600000	4473500000	4286400000	2835700000	4225600000
YOR191W	5863700000	7639400000	7306700000	6455700000	6754300000	5835800000	6687400000	6773200000	5440100000	5828900000	5373500000	4713500000
YPR035W	7359300000	6862300000	7680300000	7986700000	6741800000	7849100000	8564800000	8250700000	9591900000	8550700000	8874300000	8412200000
YHR208W	7661400000	6905700000	6551200000	7769300000	6736800000	6312900000	9580300000	8863600000	9187700000	9130500000	8581100000	8397300000
YMR246W	8752200000	8456700000	9541800000	6988400000	6729900000	7591300000	7513300000	7730200000	9292300000	7251000000	6633500000	6795400000
YDR429C	6313300000	6948700000	7176200000	5742100000	6710600000	5974600000	5945600000	7062600000	6160100000	5534100000	5982000000	5781900000
YKL009W	5435400000	6297000000	5119600000	6487300000	6669500000	4688300000	8353300000	8530500000	6316200000	5255200000	6613600000	5000500000
YDL182W	11925000000	9483400000	10802000000	7980800000	6600400000	7683900000	6734300000	5301300000	6999500000	5300400000	4871900000	4615100000
YBL015W	4678100000	4722300000	4795300000	7197400000	6544200000	6639400000	4962100000	3801700000	3642300000	3755000000	2952700000	2822500000
YOR230W	8842800000	8765600000	8635300000	6537000000	6537000000	7223400000	11331000000	10699000000	13308000000	10564000000	10048000000	11631000000
YPR088C	6731300000	6759100000	6913100000	7008500000	6523600000	6571200000	7364900000	7299900000	7353600000	6283600000	6630500000	6419700000
YCR084C	6076000000	5697300000	5790900000	7131500000	6489000000	6411100000	5308400000	5103600000	4678000000	5262900000	5789500000	4722300000
YKL150W	5740300000	6677500000	6962900000	6256500000	6440600000	6131700000	3820300000	3252200000	2833900000	3914600000	3836900000	3651300000
YIL033C	5256500000	5978500000	5112400000	6040300000	6436100000	4979400000	4542700000	4700800000	3697000000	5503800000	6122000000	5287600000
YDL192W	8394900000	7162500000	7994300000	7004900000	6407500000	7546000000	6530800000	6730600000	6864300000	7507600000	6825900000	7265300000
YPR010C	9668100000	8574200000	10318000000	6518800000	6400400000	9020600000	8438900000	7996200000	11576000000	9005300000	7224500000	9362100000
YKL117W	4554300000	5875300000	4800900000	5792100000	6398100000	4162600000	5289700000	5346500000	4498900000	4020400000	6202900000	4132700000
YLR342W	7379200000	6122200000	7167100000	6876200000	6392700000	9596900000	8730000000	8275600000	11027000000	11780000000	10240000000	12742000000
YIR006C	5280200000	5868500000	5061600000	6128400000	6389700000	5342700000	5814500000	6337400000	5080300000	5407700000	6294400000	5096400000
YNL002C	5251500000	5332000000	5725200000	6675000000	6311600000	4178300000	8361100000	7769300000	5968900000	4429100000	5835000000	4999900000
YDR502C	5202300000	4945000000	4594300000	6340800000	6309700000	6089800000	5021800000	4906900000	5079900000	6488200000	6714800000	6564900000
YMR226C	5017700000	5224400000	4560500000	5862300000	6273000000	5481100000	4642300000	5090500000	4130700000	5451600000	6381300000	5980100000
YDL022W	7072300000	6317500000	6711500000	6522800000	6207700000	6536400000	2674900000	2506400000	2573400000	7521600000	6796100000	8239500000
YDL051W	7263300000	7468900000	7394800000	5092300000	6190100000	5801500000	7687900000	8471000000	7813900000	6381200000	6686700000	6582500000
YLR359W	9322700000	8084400000	10317000000	6722200000	6177800000	8054900000	14214000000	14894000000	19151000000	12620000000	11434000000	13590000000
YML072C	5373900000	5664300000	5261900000	6342700000	6176900000	5400600000	4946300000	4912500000	4549400000	4450400000	5632100000	4799400000
YGL030W	20558000000	19803000000	15501000000	6127800000	6166200000	13457000000	7325500000	9060200000	12340000000	12158000000	4922100000	11194000000
YPR145W	6809300000	6093100000	6824800000	5958200000	6113900000	6786200000	5823800000	5539300000	6913000000	6043400000	5154400000	6118700000
YBR072W	7845400000	6288700000	7548100000	5219300000	6086500000	7578200000	3342100000	1236600000	1017000000	2082700000	1600900000	1781200000
YHR107C	5816000000	6481500000	6085700000	6004600000	6084000000	6063200000	6579300000	6603300000	6266500000	6501500000	6726100000	6835200000
YPL111W	4594700000	3815800000	4475700000	6160600000	6080200000	5445200000	9703900000	8516900000	9129500000	9376300000	9542900000	8918500000
YKL148C	3608400000	4498400000	3989800000	6228100000	6072400000	5228700000	2338800000	2062500000	1716900000	2584800000	2803600000	2310600000
YGR152C	6673300000	5827100000	5807000000	5576100000	6049100000	6486200000	4649500000	4657000000	4421100000	5256700000	5253500000	4412800000
YDR341C	8735300000	7356800000	9522600000	6709000000	6041800000	9054900000	8101100000	6919700000	11373000000	9368800000	6955500000	9478500000
YIL125W	5546300000	5429500000	5862600000	6888100000	6033700000	7016000000	3578700000	3185900000	3423600000	4759100000	3884600000	4505300000
YKR094C;YIL148W;YLL039C	9110900000	7882000000	13161000000	3662600000	6022800000	14415000000	6629700000	5127000000	8049000000	9334400000	4815300000	7484800000
YDR101C	5589500000	5178800000	5576800000	6237800000	5916500000	5613800000	7600600000	7391400000	6968000000	5772000000	6118600000	5537900000
YDR071C	4032300000	4018000000	3697000000	6274300000	5894000000	4077000000	5575000000	5118400000	3712600000	4014200000	5411700000	3563700000
YCL009C	5419700000	5100000000	5330100000	6666200000	5831100000	5948400000	4890300000	4370900000	4812000000	5029000000	5087700000	4850300000
YGL147C	6011800000	6183200000	6349000000	4118400000	5809000000	5581400000	4358200000	4845100000	5543300000	4558900000	3760900000	4298100000
YER177W	2842800000	2239800000	3034200000	5344900000	5796400000	3839800000	4079900000	4306400000	4104500000	4371100000	5442600000	4346200000
YLR449W	5489700000	7195600000	5266800000	5854400000	5781000000	4850000000	14726000000	15242000000	11775000000	10803000000	11862000000	10585000000
YML074C	7104300000	8151600000	6397200000	5277200000	5778400000	5311500000	6194900000	6867500000	6328900000	6330200000	5737400000	6357900000
YGR189C	2606200000	2829900000	2463600000	5675600000	5774000000	4325400000	3418700000	3810400000	2486800000	5715200000	6699500000	5691900000
YDL145C	6404400000	5364600000	6559200000	6227700000	5773100000	6686600000	5071500000	4585700000	5816600000	6483500000	5158900000	6247700000
YNR053C	5444100000	5290600000	5313700000	5506000000	5769500000	4850000000	5961700000	6485500000	5191000000	4397700000	5061800000	4371600000
YNL287W	5264300000	4653900000	5268400000	6332000000	5740500000	6037400000	4750000000	4760300000	5241000000	5929200000	5438900000	5577300000
YOL123W	5473900000	6647800000	5217400000	5409300000	5739900000	4785200000	5788900000	6604500000	5340200000	5195300000	5551000000	5168300000
YDR212W	5982900000	6158400000	6115900000	6567900000	5721500000	6543000000	7337800000	7077400000	8449300000	6449100000	6993100000	6592600000
YNL007C	5770900000	7392000000	5742200000	6094100000	5680600000	4842300000	5456700000	6121500000	5029700000	4682600000	5255700000	5129600000
YJL189W	1971200000	2208400000	2003800000	3572600000	5661500000	1215300000	3992500000	3858100000	1370900000	1354300000	3799500000	923010000
YER023W	4315100000	3638500000	4431300000	6237100000	5645000000	5096200000	4652000000	4894300000	4391300000	4480400000	5887800000	4363600000
YER086W	7847500000	7729700000	7645500000	6529800000	5640200000	7858600000	5765600000	5677700000	7087000000	7808500000	6060100000	7952100000
YKR048C	4081900000	4063200000	3440100000	5800900000	5632600000	3597600000	6318800000	5976300000	4267700000	4609800000	6359700000	4535800000
YFL038C	4666300000	4036500000	4657600000	5787100000	5620300000	5082800000	4674300000	4535300000	5016500000	4876000000	5427900000	5643700000
YMR079W	5745800000	4715600000	6291500000	6194000000	5618600000	6701900000	5829300000	6001800000	7114600000	7018600000	6723900000	7175600000
YGR229C	4570600000	5518800000	4172800000	5894700000	5598300000	4442500000	4967900000	5222100000	4139600000	4255900000	5090700000	4393800000
YPL019C	4256300000	4225700000	3884100000	6164800000	5572200000	5227300000	4471600000	4393600000	3936900000	3811600000	4315700000	3758800000
YCL030C	6912900000	7104100000	6521300000	5548600000	5549600000	4976200000	5497600000	6312300000	5933300000	3926200000	4201900000	4104200000
YOR136W	5384400000	5391500000	6387900000	5763600000	5545000000	7645100000	2250200000	2050000000	2346300000	3825900000	2771100000	3552100000
YPL085W	4794000000	5731500000	4928900000	5300200000	5518200000	4583400000	4847300000	5297300000	4218900000	4181900000	5303700000	4419700000
YJL020C	4198300000	5025600000	4227100000	5203500000	5500200000	4632100000	3498100000	3898200000	3104300000	4502500000	4969800000	4157700000
YFL037W	6485500000	6098800000	6547400000	6272500000	5492200000	6569800000	5464500000	4995700000	5593800000	6011400000	5935100000	6018300000
YGR054W	6253300000	5813400000	5918700000	6309000000	5484000000	6099500000	6507200000	6050700000	6295500000	6026900000	5692800000	5804600000
YJR077C	5975100000	4520600000	6661300000	6334000000	5481000000	8939800000	2938300000	2392600000	3756200000	5035200000	3486300000	4674000000
YHR027C	5788500000	4776700000	6051600000	6528100000	5420800000	6890300000	6382200000	6254900000	7602000000	7676200000	6924700000	7953100000
YDR399W	5832000000	6228600000	5603100000	5805800000	5389200000	5230800000	5818700000	5583600000	5495300000	4050100000	5052300000	4457800000
YGR209C	12813000000	17148000000	11946000000	4394600000	5320100000	9192800000	5719800000	5473600000	7385400000	9307600000	5222800000	7909900000
YML010W	4305700000	4457200000	4132400000	5416600000	5302600000	3919200000	4812400000	4976400000	3707800000	3547200000	4513000000	3523600000
YEL040W	3249400000	3478900000	2944400000	4979900000	5290700000	4136600000	4483000000	4501200000	3399100000	3532700000	4952100000	3783800000
YER090W	4928500000	4861700000	4763200000	5354800000	5268300000	5040100000	5300600000	5321900000	5348300000	5285800000	5725700000	5240000000
YMR121C	4501700000	6791700000	4696700000	4727900000	5234500000	4922600000	4281300000	4469000000	4016800000	3888200000	4455900000	4128800000
YDL140C	6257100000	5629000000	6065300000	5657900000	5160100000	6520600000	5226500000	4687200000	6081500000	6149400000	5370400000	5923500000
YLR196W	6657400000	7187200000	6736500000	5135400000	5145100000	5589000000	14588000000	14614000000	16202000000	11684000000	11784000000	12638000000
YEL046C	7382300000	5255300000	6678000000	5948000000	5129000000	7300800000	6341100000	5746900000	8303400000	6764400000	6087900000	7306300000
YDR188W	6268100000	6228100000	6598300000	5358800000	5122800000	6291900000	6073000000	5834700000	6471600000	5966300000	5296100000	6093700000
YJL200C	6277400000	6227500000	6168100000	5426100000	5121400000	4787900000	5038200000	4876600000	4793700000	3717400000	3836000000	3508200000
YGR279C	4873100000	5516500000	4829300000	4897800000	5106500000	4114500000	4317700000	4476000000	3806900000	4897700000	5848900000	4723400000
YBR029C	5052500000	3840200000	4967100000	5530000000	5104300000	4723700000	4237000000	5060900000	4272900000	4632000000	5488800000	4967500000
YNL220W	7430200000	6149500000	6813200000	5682600000	5096600000	5794800000	6542100000	5925700000	6642900000	4567400000	4712200000	5135900000
YPL260W	4243600000	4127700000	4224600000	5200200000	5096400000	4553500000	4199000000	4066100000	3701000000	4205600000	4846700000	4493900000
YNL189W	5178600000	4779700000	5239400000	4640400000	5080900000	5122200000	5063900000	5322300000	6135800000	5084400000	5112900000	5764700000
YJR007W	5453400000	4300100000	5963100000	5349200000	5047500000	5673000000	5122500000	4539100000	6157900000	5572800000	4728900000	5413600000
YJL012C	4279500000	3937500000	4329000000	6262400000	5026100000	5291400000	5848600000	5075500000	5110500000	4465400000	4547100000	4554600000
YDR190C	5276900000	4904700000	4914600000	5365500000	4998200000	5330000000	6228900000	6244000000	5935800000	5496200000	5767700000	5900800000
YKR095W	3644300000	4311600000	3230700000	4711800000	4988100000	3417900000	4143300000	4438100000	3144600000	3103800000	4322600000	2959800000
YNL135C	11200000000	9925900000	13046000000	3234700000	4936200000	10153000000	5701800000	4101300000	8295100000	10799000000	4380300000	10931000000
YJL026W	5922000000	4812100000	6126500000	5708300000	4923100000	6418200000	4665300000	4777300000	6773000000	5891300000	4807000000	6707300000
YLR061W	9157300000	15339000000	9302700000	4664200000	4921400000	5069900000	7628400000	6769600000	6189600000	7920500000	5021100000	5643200000
YML078W	5083200000	6244100000	5653500000	3450500000	4911900000	5519300000	3087600000	3182300000	3187400000	4241900000	3349100000	4347800000
YDR529C	2559100000	3847400000	3733100000	3861000000	4886900000	3890700000	2582300000	2605000000	1902200000	2119500000	2674200000	1937400000
YDL100C	5403300000	4788300000	4839900000	6033700000	4884900000	5184000000	5747000000	5382000000	5900100000	6398400000	6444600000	6519400000
YOR362C	4606600000	4922500000	4380200000	5096900000	4867800000	4670300000	5313500000	4987300000	4577800000	5005200000	5372300000	5033100000
YOR142W	3285500000	4067600000	3226800000	4697000000	4829200000	4006800000	2219400000	2269900000	1894000000	3219200000	3646900000	3233400000
YMR056C	4678000000	3138300000	4377700000	4951600000	4815400000	5220500000	2350800000	1729300000	2445600000	3101400000	2495400000	2273500000
YNL016W	3645600000	3530100000	3633400000	5436800000	4798300000	3280300000	5470600000	4646900000	3583100000	3468400000	4599200000	3515500000
YNL175C	4971900000	6034200000	5079100000	4319000000	4752300000	4188500000	5044300000	6107700000	4975500000	3957400000	4425600000	4183600000
YKR046C	3303400000	3418200000	3616500000	4430000000	4742300000	4023800000	3143500000	3637000000	3254700000	5219300000	5373500000	5046200000
YDR234W	5317600000	5946500000	5266200000	4758000000	4736100000	4340000000	4541400000	4246400000	4270100000	3182400000	3692500000	3622900000
YER122C	4755300000	5352800000	4779200000	4292700000	4727200000	4198800000	4417200000	4658600000	4385900000	4305600000	4570000000	4370900000
YPL006W	2501400000	2468800000	2358400000	5071800000	4723000000	3222500000	2557600000	2472500000	2278600000	2596100000	4352100000	2776300000
YER156C	4047100000	3438600000	4001800000	5575100000	4719600000	4331900000	5165000000	4482900000	4483000000	3998900000	5023000000	4371500000
YMR131C	4835300000	4857200000	4730100000	4913700000	4714500000	4706000000	5163000000	5323900000	5155400000	4153800000	5149000000	4168300000
YKL016C	2035800000	3076300000	2869100000	3917200000	4701800000	4003800000	1822900000	2069400000	1636900000	1808500000	2287700000	1554300000
YPR069C	5008500000	3970500000	5678500000	5576400000	4692200000	5449100000	6958500000	5966600000	7843900000	6159900000	5989200000	5843000000
YPR181C	6035000000	4701400000	7149600000	4932100000	4678200000	7297100000	4210800000	4075100000	6876700000	6883100000	4935200000	7421600000
YHR025W	4694500000	4906100000	5162500000	4607100000	4668400000	4863200000	4393700000	4423600000	5281200000	5003200000	4628100000	4960300000
YGR130C	3672000000	3975900000	3474700000	3735100000	4662500000	3951600000	1993300000	2192200000	1825900000	2548200000	2625200000	2506300000
YKL145W	4295400000	4210700000	4176500000	4697700000	4658800000	4260900000	4671400000	4509800000	4195500000	4578700000	4822700000	4659900000
YNL138W	3873800000	3447600000	3749400000	5359900000	4641700000	4253100000	4225500000	4087300000	3379300000	3935200000	5057900000	3787300000
YMR260C	11877000000	12557000000	10900000000	3363300000	4641400000	11059000000	4747700000	5077400000	12036000000	10488000000	3757600000	11674000000
YPL273W	4263300000	4150900000	4438400000	4262600000	4641100000	4137100000	3527200000	3183800000	3179000000	3176000000	3062200000	3001900000
YPR112C	3243100000	3545400000	2899800000	4433900000	4636600000	2866600000	7382100000	7588700000	4924700000	3571100000	5572200000	3665200000
YPL240C	2898300000	2695000000	2956000000	4593200000	4634500000	3562600000	3272200000	3445300000	3002700000	3325100000	4476500000	3171000000
YLR244C	5444600000	5714700000	4754000000	4884900000	4618800000	4022000000	13549000000	13698000000	11721000000	9296400000	10540000000	9224700000
YDR232W	4032900000	3825600000	5204500000	5123600000	4617600000	4858200000	3583800000	3607600000	4185100000	3667100000	4116900000	3512200000
YLR314C	3882200000	4260900000	3659800000	4702000000	4617500000	3885400000	8248100000	8550800000	7537700000	6846800000	8385900000	7516000000
YDL226C	5229200000	6170300000	5001900000	4206400000	4609400000	4453900000	4133700000	4473900000	4410300000	4123100000	3952400000	4290300000
YOL145C	4861800000	3921700000	4860700000	5108600000	4578300000	5007600000	5117100000	4617300000	6038600000	4993800000	5076000000	5031600000
YJL076W	4002000000	4596900000	3747200000	4249100000	4577700000	3400100000	3439800000	3837200000	2962200000	3010500000	3684700000	3029700000
YGR180C	6757600000	4937700000	6955500000	5823400000	4564700000	6992400000	6144800000	5483500000	8992000000	7273300000	5490800000	8013800000
YGR214W	1748600000	3060900000	1207900000	5773700000	4558700000	1371400000	4110700000	3652400000	870190000	1439300000	5025100000	979820000
YBR149W	3532400000	3079300000	3236400000	5194100000	4503700000	4990000000	4112200000	3427600000	3705300000	4976800000	4998700000	4927900000
YNL188W	3699700000	3053800000	3600100000	3794100000	4485800000	4271600000	4592100000	4928600000	4376500000	3377900000	4027800000	2132200000
YFL016C	3456100000	4241300000	3172300000	4443200000	4469800000	3139000000	3488800000	3568000000	2776200000	3214200000	4203800000	3008000000
YCL018W	4122100000	4013800000	4054600000	5111900000	4444300000	4630300000	6052100000	5762100000	6293000000	5523800000	5617900000	6946000000
YMR235C	5244300000	3951400000	5248700000	5565700000	4427100000	5883100000	5262100000	4452800000	6173500000	5614300000	4877100000	5408800000
YDL007W	3372900000	3911300000	3426200000	4490000000	4414700000	3367500000	4512000000	4495700000	3455600000	3711900000	4518100000	3497900000
YML075C	5283800000	4629800000	5276900000	4308100000	4413500000	3944700000	7300600000	7639700000	7478300000	5734400000	5848000000	5603400000
YOR095C	5164500000	5504700000	5625800000	4170600000	4400500000	4548700000	4513300000	4334300000	4514100000	3380500000	3375100000	3513200000
YOR151C	5222700000	4767700000	5576800000	4467700000	4366000000	5543500000	4152600000	4160500000	5502100000	5185800000	4213000000	4873100000
YGL207W	5346100000	4915400000	5729500000	4671000000	4361500000	5588800000	4532600000	4096100000	5199600000	5295700000	4327000000	5468900000
YMR049C	5362700000	4545600000	4795200000	4416500000	4354400000	4315900000	6416400000	6268200000	6616800000	4810200000	5119200000	5070400000
YHR008C	3071100000	3555900000	2898000000	4020100000	4354100000	3265900000	2942200000	2592500000	2180500000	2831500000	2735100000	2281400000
YPL262W	4164500000	4388700000	4320700000	5094900000	4351200000	4957900000	3578400000	3493600000	3567600000	4343200000	4216500000	4149800000
YOR270C	5379100000	3421500000	4833900000	5264000000	4336000000	5192800000	5858300000	5379200000	6556900000	5771300000	5757800000	6134000000
YGR135W	3370900000	2900400000	3202200000	3584100000	4327200000	3461700000	3885000000	3903600000	3581200000	3724200000	4088100000	3496900000
YDR194C	3308400000	3010400000	3430600000	4500700000	4306000000	3707700000	2160700000	2196600000	2039900000	2251500000	2785200000	2000300000
YMR276W	4200100000	5350900000	4364600000	4001700000	4300700000	3892700000	3921900000	4294900000	3749700000	3827600000	4343300000	3880100000
YMR072W	2382400000	3677500000	3577500000	3095900000	4289900000	4294900000	3806200000	4049300000	3929800000	3842600000	4077600000	3457100000
YLL008W	4081500000	4294300000	3930000000	4500400000	4273500000	3663200000	12587000000	12524000000	10823000000	7568100000	8855300000	8365500000
YLL021W	3710100000	4103400000	3462000000	4142900000	4263800000	3151100000	7784700000	8354600000	6493800000	5305500000	6670300000	5061900000
YOR065W	4153500000	4246200000	4963400000	4303800000	4254500000	5411000000	2125500000	1963200000	2263300000	3014600000	2402600000	2777800000
YHR068W	5051500000	3841400000	4968400000	5170400000	4245500000	4911900000	5417700000	4913600000	5647500000	4701100000	4850700000	4599800000
YNL248C	4746200000	5442100000	4720200000	4197000000	4217500000	4073600000	5889100000	5702000000	5217200000	4227900000	4690700000	4341100000
YEL058W	2737700000	2936600000	2881000000	4409900000	4215900000	4708200000	3569500000	3380500000	3921900000	6275100000	5888100000	6258900000
YHR104W	4305100000	3964700000	4454600000	4761400000	4214100000	5654400000	3298700000	2948400000	3465800000	5652400000	4726000000	5189100000
YOR046C	4531900000	4287500000	4408400000	4471300000	4181000000	4246000000	5037700000	4851600000	4890100000	4343300000	4506300000	4852600000
YDR500C	9406500000	8465800000	10572000000	3178300000	4177200000	10021000000	2616100000	1888400000	5206600000	5980100000	2686600000	5673600000
YHR089C	3301300000	3819000000	4380200000	3356300000	4132100000	3848800000	3830900000	3807800000	3845000000	3885800000	3295500000	3518000000
YPL117C	5224600000	4821400000	5522000000	5083400000	4124000000	4875700000	5185600000	4928300000	5188500000	5159300000	4388500000	4952100000
YDL208W	8217100000	8203000000	7724200000	2892400000	4095500000	6197300000	4076100000	4180500000	7797600000	5890800000	3261700000	6275900000
YHR066W	4005100000	4342900000	3474100000	3993800000	4090200000	3381800000	5377300000	5942300000	4606900000	3244900000	3981700000	3853300000
YHR042W	4262600000	3750400000	4425000000	4257800000	4078300000	4243800000	4210500000	3986300000	4405500000	4247600000	4404900000	4464000000
YER048C	2927000000	3376100000	2658400000	3809700000	4042600000	2962700000	3419700000	3810600000	2814500000	2998400000	3559400000	2908300000
YNR051C	3874800000	4993500000	3893700000	4262600000	4036800000	3524600000	4201800000	4619700000	3315800000	3350700000	4208000000	3682500000
YDR060W	4908500000	4882800000	5199900000	4509900000	4036800000	4710000000	4622200000	4563600000	5141100000	4163700000	4335500000	4415300000
YDR168W	2593100000	2963700000	2524600000	3608800000	4013400000	2725900000	3815000000	4125500000	2944200000	3662200000	4881500000	3613800000
YEL047C	4345500000	4627300000	4141300000	3993000000	4013200000	3788600000	4980300000	5203700000	4825500000	4651800000	5174900000	5231200000
YLR438W	5749900000	4976900000	5406200000	4543600000	4008000000	4584200000	15840000000	13528000000	17642000000	16733000000	16608000000	17623000000
YGR244C	2720200000	2715900000	2680600000	4294600000	3984900000	4180800000	1518600000	1411000000	1197300000	3252200000	3163900000	2903800000
YBR221C	3872100000	3275800000	3895700000	4809100000	3961500000	4391700000	3628200000	2953500000	3485800000	3739100000	3743100000	3384700000
YBL004W	5542900000	3808800000	6013500000	4444900000	3952700000	6649000000	5878700000	5865200000	8543800000	6889000000	4748000000	7251900000
YOL077C	4672000000	3405900000	4926400000	4702200000	3939800000	4758300000	5342900000	4287900000	6097700000	4776000000	4151400000	4695100000
YMR290C	4820500000	4010000000	4953800000	4267700000	3939100000	5043600000	5954400000	5597400000	6783600000	4885100000	4167000000	4892700000
YFR009W	4432000000	4387600000	4461100000	3960100000	3935500000	4156600000	4565600000	4663500000	5185900000	4690600000	4264700000	4586600000
YOL027C	4234100000	4520600000	4202700000	4035300000	3921400000	4446900000	2829300000	2970400000	2912000000	3410800000	3352400000	3603200000
YMR203W	4462800000	4082100000	4375200000	4578400000	3920300000	5560800000	3210200000	2598800000	3257600000	3927900000	3506500000	3883500000
YGL043W	3089400000	3797300000	3322900000	3334000000	3912300000	2993400000	3092000000	3541800000	2768300000	2647100000	3552900000	2797900000
YHL011C	4295300000	4203500000	4624800000	4368900000	3910300000	4171900000	4511800000	4845700000	5240100000	4271100000	4433700000	4376100000
YER126C	3752000000	4341200000	4031500000	3350000000	3891800000	2963400000	4471200000	4919600000	3984900000	3197800000	3523100000	3078800000
YML093W	4084000000	4988800000	4009000000	3444300000	3891300000	3414800000	4053800000	4806700000	4285400000	3467800000	3733200000	3453000000
YMR315W	2229700000	2417800000	2290800000	3631100000	3883300000	3717900000	1574800000	1633000000	1533300000	5207600000	5152000000	5310400000
YLR410W	3351500000	3370100000	3279600000	4307200000	3868200000	3573500000	8356400000	8169900000	7527500000	6643300000	7486500000	6803300000
YLR276C	4049500000	4156400000	4198000000	4075500000	3865000000	3774700000	9206300000	9280300000	9171200000	7423500000	7200100000	7008800000
YDR365C	4788500000	5246400000	4265300000	3340700000	3830600000	3162600000	4525700000	4973900000	4719800000	3657500000	3836000000	3617900000
YPL217C	4152100000	4511200000	4051800000	4050100000	3823200000	3706900000	5324800000	5337700000	4804800000	3786300000	4181000000	4068600000
YPL235W	4257000000	3412700000	4580600000	4319900000	3817100000	4735800000	4864200000	4743700000	5789600000	4663500000	4936900000	5233900000
YMR300C	4219300000	4174300000	4097300000	4146500000	3814200000	3444700000	4835600000	4735100000	4386800000	4136100000	4256500000	3826100000
YBL007C	3199500000	3654400000	3022500000	3810600000	3811700000	3087400000	2777400000	2964300000	2161600000	2527300000	3102500000	2558300000
YJR002W	3625000000	4131500000	3487800000	3222900000	3799500000	2952400000	4143600000	4446600000	3804700000	3220500000	3595100000	3365100000
YPL232W	2257400000	2954400000	2320700000	3425400000	3794200000	2467600000	2611500000	3083700000	1993700000	2451300000	3865500000	2718600000
YNR073C;YEL070W	1172400000	535510000	1263400000	4691700000	3790900000	6028300000	5282900000	2039500000	1499700000	4737800000	2909000000	3507100000
YOL038W	3276200000	3307700000	2900600000	3902800000	3783600000	3113700000	3518000000	3743600000	2840100000	3313700000	3826100000	3023000000
YJL111W	4575100000	3975900000	4774500000	4399700000	3777900000	5254400000	4581700000	4069500000	5252900000	4748700000	4365300000	4890000000
YBR248C	4983500000	4743100000	4828600000	4168700000	3775500000	4441200000	5545100000	5136400000	5616600000	5372000000	5005300000	5527100000
YDR035W	3199100000	3308400000	2931600000	4123300000	3771100000	3333800000	3653100000	3295600000	2939400000	3344500000	3587900000	3188300000
YOR206W	3517900000	3700800000	3282800000	4248000000	3757500000	2894300000	4759700000	4685400000	3939100000	3123800000	4256100000	3095000000
YGL120C	4727400000	4207700000	4745700000	3722300000	3733300000	4700500000	5269100000	4970000000	6533300000	4979800000	4321900000	5078100000
YJL123C	3442300000	3445100000	2842800000	3677000000	3713500000	3376400000	3224600000	3446600000	2765800000	3105600000	3860800000	3450200000
YNL241C	3508400000	2942500000	3715600000	3623500000	3709900000	4443300000	3251900000	3198200000	3853300000	4878800000	4168200000	4728200000
YNL104C	4352000000	3305500000	4612100000	3848500000	3708700000	4942100000	2800900000	2710000000	3797300000	3858400000	3270000000	3963200000
YMR011W	3359600000	3208500000	2804700000	3955400000	3706200000	3887100000	3776800000	3939700000	4330200000	4363800000	5141200000	4733300000
YDL095W	2814100000	2165200000	2422000000	4004000000	3693900000	2705000000	2594300000	2538200000	2101100000	2611600000	3464800000	2589800000
YFR037C	3448100000	3459200000	3230300000	3348600000	3662500000	3109200000	3356800000	3731200000	3091600000	3132400000	3422100000	3086300000
YGR253C	4011800000	3787600000	3929500000	3695900000	3657500000	4340900000	3541200000	3356500000	4470500000	4002000000	3986700000	4250700000
YGR231C	3031700000	3588200000	2953000000	3273000000	3648900000	3352600000	2114700000	2035200000	1925000000	2280200000	2466900000	2221100000
YIL075C	4225600000	3763600000	4853600000	4042500000	3640700000	5152100000	3943700000	3807900000	5165300000	5127000000	4283700000	5057400000
YOL061W	3691900000	3304200000	3633500000	4229100000	3636800000	3583600000	4489000000	4374100000	4350600000	3735700000	4388900000	3685300000
YMR314W	3117300000	2875200000	3018900000	3871500000	3632400000	3144400000	3123500000	2782900000	2717500000	3048200000	3412500000	3002500000
YBR049C	3165700000	3549500000	2677300000	3316700000	3623500000	2483500000	3476400000	3703200000	2413600000	2255300000	3149900000	2101800000
YGR193C	3317600000	3942400000	3450800000	3602600000	3610800000	3280100000	2930900000	3165200000	2619500000	2925500000	3446000000	3054600000
YHR007C	4077300000	3365600000	3783200000	4463500000	3589500000	3574100000	8561100000	8022800000	8519400000	6258900000	7106700000	6548400000
YML070W	3535900000	3491400000	3222900000	3802100000	3574600000	3438900000	2928100000	2711100000	2563900000	3496900000	3682300000	3460200000
YKL080W	5178200000	4306300000	5391300000	3924200000	3563300000	4430600000	4240600000	4215700000	5165800000	4387600000	3746400000	4585300000
YGL048C	3819800000	4272600000	3680800000	4000000000	3558700000	4032300000	4529700000	4323600000	4148400000	4241300000	4119200000	4256100000
YDR394W	4281500000	3958700000	4770500000	3712100000	3541200000	4223700000	4219500000	3902300000	4831900000	4648200000	4031900000	4745000000
YBR086C	2689800000	2717500000	2660300000	3582100000	3537600000	2778800000	2679800000	2795500000	2208700000	2463600000	3389500000	2350700000
YKL181W	3916300000	3440900000	4005900000	3871100000	3534900000	3968700000	3999700000	3717700000	4079100000	3837600000	3976600000	3729900000
YFR051C	3528100000	3286900000	3818400000	4171300000	3525400000	4007900000	3067700000	2920000000	3371900000	3563800000	3691200000	3651000000
YDR068W	3516100000	4740900000	3424100000	2619400000	3511600000	3368600000	2781600000	3392200000	3044600000	3278900000	3250400000	3802700000
YFR016C	3061200000	3655800000	3033400000	3127400000	3500800000	3290200000	2572400000	2885800000	2535300000	3187100000	3443300000	3373600000
YGL137W	4220600000	3268200000	4368500000	4012300000	3466200000	4782500000	3575600000	3287000000	4786100000	4967800000	3986200000	4822800000
YLR028C	3978500000	3823500000	3793000000	4027700000	3460100000	3782300000	6203700000	6000800000	6245200000	7324600000	7234500000	7173800000
YGL221C	3675300000	3177800000	3497900000	3943400000	3458800000	4121200000	3462700000	3131100000	3839400000	4554600000	4175300000	4487500000
YHR146W	3967100000	5097300000	3993700000	3447800000	3449300000	3762100000	3257500000	3623600000	3624600000	3441800000	3147500000	3688900000
YNR071C	1019800000	731420000	909850000	3787100000	3437700000	3443400000	3166100000	1134200000	554850000	1788500000	1303200000	1213200000
YPR133C	3521100000	4173700000	3781300000	3260500000	3431400000	3246300000	3587800000	4127800000	3628700000	3512900000	3591600000	3708800000
YER087C-B	3042600000	2821600000	3140600000	3272000000	3426900000	3959400000	2051600000	2495000000	2184900000	3119000000	3828900000	3967600000
YBR112C	3175900000	3459300000	3201100000	3362600000	3415900000	3043100000	2633700000	2902500000	2536800000	2391500000	2706900000	2462600000
YPR060C	3837800000	4196700000	4181900000	3507300000	3406600000	3572200000	5221500000	5011500000	5266900000	4090100000	4153300000	4194900000
YFR030W	2486300000	2035800000	2211200000	3616000000	3394800000	3805800000	1796100000	1829700000	2523800000	2471600000	2381300000	2943500000
YLR388W	2050100000	2462800000	2637200000	2641700000	3393400000	2497600000	3607400000	4068500000	3855400000	2882900000	4713900000	2723500000
YNL216W	2891200000	3281000000	2817500000	3338200000	3382000000	2535100000	3216000000	3075400000	2524000000	2441700000	2918200000	2410800000
YEL071W	4726900000	4033100000	5053900000	3820800000	3372300000	4551800000	3898100000	3649700000	5165100000	4717200000	4364600000	4900400000
YKL094W	3236100000	3299100000	3222200000	3259500000	3368700000	3567800000	2469100000	2249800000	2575400000	3028300000	2999500000	3224800000
YDR238C	3693200000	2663900000	3628300000	3807300000	3341200000	4380800000	2832200000	2658400000	3825900000	4117100000	3637500000	3991600000
YPL079W	4639300000	4447400000	5891000000	2391300000	3338600000	3776200000	2212500000	3034100000	4064600000	3205700000	1935300000	3734900000
YCL059C	2488400000	2934400000	2413400000	3513400000	3335300000	2146700000	4724300000	4686400000	3235600000	2377100000	3193600000	2554300000
YPL239W	2726700000	2830600000	3260200000	2342000000	3329400000	2540300000	3891100000	4160800000	4016400000	2601500000	3075300000	3231000000
YER070W	4627300000	3972200000	4689900000	3732800000	3327700000	4634300000	3025400000	2709800000	3974300000	3588900000	2809400000	3571000000
YER089C	2875800000	3019800000	2757500000	3292100000	3326300000	3046100000	1999900000	1994300000	1969200000	2264800000	2215200000	2142500000
YER049W	5224700000	3633300000	5203600000	4066700000	3321900000	4968300000	5410300000	4879800000	6775900000	4745800000	4476500000	5045800000
YPL249C-A	5248400000	5808200000	4955200000	2476300000	3316700000	5346700000	3355200000	3461300000	3530900000	4317400000	3307900000	5157300000
YBR142W	3646000000	3870500000	3817600000	3514100000	3310900000	3437600000	4231500000	4441900000	4336900000	3420100000	3592500000	3635700000
YMR241W	4305500000	3780500000	4802100000	3261600000	3304600000	4194600000	2331200000	2234900000	3296500000	3006000000	1969200000	3021500000
YDR321W	3102200000	3261000000	3224600000	3235100000	3296300000	3018600000	3840600000	4133200000	3936200000	3068600000	3652700000	3081300000
YGL049C	2929500000	3266100000	2764300000	3500800000	3284900000	2531000000	3271100000	3592200000	2630300000	2540100000	3426000000	2851700000
YCR004C	2733100000	2456900000	2788700000	3576700000	3271600000	3128100000	2759400000	2848800000	2648200000	2852800000	3464700000	2648300000
YLR134W	3625000000	84682000	25471000	126350000	3244800000	204700000	37729000	107740000	95532000	57476000	66955000	99515000
YGR145W	2839500000	3182700000	2875000000	2951300000	3238000000	2376700000	4176100000	4700000000	3556700000	2836700000	3291900000	2825200000
YLR401C	3716300000	4079500000	3653400000	3230100000	3229300000	3072100000	6639900000	6886400000	6390200000	5148300000	5473600000	5333800000
YBR247C	3652300000	3788700000	3813000000	3378600000	3218700000	3094800000	3929700000	4292900000	4394700000	3297300000	3386900000	3347900000
YDR377W	2608100000	4771400000	3117300000	2633100000	3216100000	4198200000	1396200000	1468400000	1477600000	2095400000	1677500000	2413300000
YDR177W	2626200000	3093200000	2642200000	2877600000	3202000000	2562200000	3390100000	3263700000	2943100000	2381300000	3325500000	2855600000
YML106W	3889200000	3433200000	5197800000	3676100000	3172300000	4691800000	2898400000	2713300000	4332200000	3834500000	2903700000	4054900000
YGR116W	3297900000	3060900000	3192000000	3422600000	3169600000	3402100000	3211600000	2903100000	3287600000	3347600000	3160100000	3309100000
YML105C	2846400000	3316700000	3177300000	2891500000	3166400000	2471700000	2736400000	3215700000	2602400000	2464700000	2852800000	2311300000
YGL173C	4198300000	3808000000	4649900000	3591400000	3164900000	4908500000	3079400000	2792000000	4098400000	3780300000	3094900000	3899100000
YKL027W	4149200000	3588700000	4303600000	3934600000	3155600000	4067400000	4098500000	4030300000	4724700000	4437900000	3810800000	4191600000
YDL103C	3162400000	3363800000	2935900000	3350100000	3134400000	2906700000	3431000000	3127200000	3151800000	3447500000	3476500000	3050100000
YFL048C	2388600000	2828200000	2534800000	3146500000	3132000000	2643300000	2564000000	2617900000	2391000000	2784700000	3247500000	2948700000
YKL195W	3092100000	3622700000	2855500000	2872200000	3129400000	3339000000	1887000000	2063700000	1913200000	2583800000	2401000000	2545300000
YOR239W	3377900000	3789300000	2790200000	2776800000	3127000000	2747900000	2761600000	3136000000	2816600000	2874000000	3116500000	2994500000
YGL187C	3072400000	3021800000	3840200000	2578900000	3118800000	4648100000	1680300000	1498100000	1931400000	2581300000	1764900000	2697100000
YPL091W	3605600000	3763400000	3242500000	3370400000	3114600000	3559200000	2852200000	2897100000	2861200000	3352000000	2900600000	3274500000
YGL011C	3231900000	3143500000	3235400000	3297600000	3108700000	3950700000	2935100000	2860000000	3653900000	3960800000	3765000000	4313900000
YNL132W	3934000000	3757700000	4141800000	3501600000	3100700000	3458800000	5065600000	4630900000	5232300000	3836000000	4030500000	4088700000
YPR148C	2196500000	2324300000	2170200000	3399400000	3093000000	2915300000	2090200000	1967500000	1788500000	2629600000	2866500000	2610200000
YNL111C	2308500000	2856600000	1994300000	3103200000	3087400000	1347500000	5233400000	5742200000	2964300000	2831700000	4390100000	2596200000
YIL043C	3751400000	3721700000	3658400000	3435600000	3086600000	3525900000	3360700000	3162900000	3904300000	3813300000	3355100000	3844500000
YKL067W	3909200000	4034600000	4044900000	2511900000	3081000000	4263400000	2033800000	1871300000	2250300000	2864600000	2062300000	3100300000
YFL014W	3365900000	3310400000	5062000000	2106900000	3070700000	7729000000	341540000	148610000	209250000	6677800000	2926600000	6088700000
YER073W	3607900000	3440600000	3292000000	3251400000	3065400000	3364600000	4857500000	4496300000	4719700000	4021700000	3860800000	4018800000
YKL212W	3195200000	2697800000	3200400000	3352400000	3055500000	3494200000	3443400000	3045000000	3954800000	3825300000	3673900000	4036500000
YGR119C	2523300000	3098900000	2449100000	2805700000	3045600000	2311200000	2793600000	2964800000	2184100000	2275600000	3013700000	2153400000
YKL112W	2582000000	2622900000	2349600000	2775300000	3044600000	2326500000	2883100000	3265100000	2262900000	2059000000	2836000000	1976500000
YDR299W	3166000000	3455600000	3184800000	2894600000	3041800000	2559500000	3897400000	4188700000	3617800000	2848200000	3290700000	2838600000
YNL169C	1955500000	1961600000	2207900000	2942700000	3040300000	2472300000	1964500000	1964300000	2259300000	2234000000	2677900000	2300400000
YCL054W	2988100000	3347700000	2756900000	3172000000	3027700000	2389700000	4095200000	4242200000	3478200000	2758700000	3453800000	2840200000
YDR086C	2907400000	3432600000	2569400000	3853600000	3026400000	2771600000	3900700000	4231000000	2895000000	2323500000	3325700000	3429000000
YML092C	3035100000	2895100000	3131300000	2832200000	3025100000	2817400000	3042600000	3196000000	3180600000	3038100000	3226300000	3510600000
YIL115C	2477100000	2733100000	2349200000	2979500000	3024300000	2457300000	2987000000	3149500000	2432200000	2359300000	3078300000	2449000000
YJL050W	4106200000	3604400000	4253600000	3342000000	3018600000	3451900000	4310400000	4565700000	4749400000	3546900000	3595400000	3425400000
YCL040W	2788400000	2314800000	2869900000	3550000000	3014800000	3553200000	2450800000	2099900000	2444600000	3058100000	2706800000	3499700000
YIL038C	2758800000	2898000000	2522500000	2725700000	3013700000	2422200000	3099200000	3540300000	2645500000	2183300000	2972100000	2439500000
YDL078C	3012600000	3541400000	3436400000	3236500000	2994000000	3228000000	2578900000	2546000000	2321700000	2536300000	2621100000	2766400000
YEL060C	2328500000	2497700000	2478200000	2853200000	2989400000	3115300000	2222200000	2442900000	2476400000	5304100000	5355000000	5976500000
YIR004W	1987000000	2377500000	1883500000	2763300000	2987700000	2378500000	1920800000	2057000000	1608500000	2042200000	2575200000	1989900000
YLR330W	3081600000	3211500000	2972500000	3147600000	2977500000	3525000000	4760000000	5088900000	5090700000	5053300000	5034600000	5712600000
YGR132C	2636500000	2782900000	2514600000	3017300000	2964500000	2621200000	1996000000	1806300000	1592700000	2113700000	2097300000	1977700000
YPL243W	3279100000	3030600000	3136800000	3101900000	2939300000	2814800000	3049900000	2980000000	2998600000	2671900000	2895600000	2653300000
YML120C	2119800000	2128100000	2164700000	3229700000	2933500000	2900500000	1422000000	1174100000	1127600000	1744400000	1576900000	1529700000
YPR036W	3334900000	2165400000	3061700000	3640100000	2931900000	3647400000	4099600000	3505300000	4502700000	4293200000	3974600000	4217200000
YDL148C	3005700000	3595600000	3041800000	3152800000	2919600000	2604600000	4043600000	4144200000	3495900000	2813100000	3059000000	2992800000
YMR318C	2482600000	2522600000	2493500000	2887700000	2910500000	3565800000	1787700000	1888100000	1921500000	2426300000	2295000000	2552500000
YIL136W	2165100000	2307400000	2469600000	2846000000	2898600000	2874300000	1650900000	1242000000	1073600000	1848100000	1513900000	1563700000
YLR022C	2343400000	2849300000	2471200000	2507500000	2894500000	1949300000	7899100000	8593200000	6433100000	4842300000	6405300000	4798400000
YKL204W	2450400000	3263800000	2367900000	2895800000	2892700000	2436900000	2441900000	2701300000	2155300000	2317100000	2651000000	2388700000
YBL058W	2843000000	3137700000	2700200000	2643500000	2888200000	2456800000	2186800000	2294400000	2074400000	2355600000	2705300000	2380300000
YDL031W	2924500000	3240200000	2792300000	2955200000	2887100000	2389100000	3351700000	3796100000	2974600000	2620200000	2904200000	2562000000
YFR004W	2492300000	1955500000	2329400000	2950500000	2886300000	2569900000	3391300000	2946900000	2673700000	2785500000	3121300000	2719800000
YMR099C	3023000000	2747800000	2928300000	3480700000	2879800000	3007500000	2903800000	2592200000	2719400000	2752100000	3242200000	2647600000
YOR145C	3648800000	3594700000	3296600000	2916800000	2878200000	3004600000	4079900000	4666900000	4697000000	3208300000	2745500000	3187700000
YPR024W	1964000000	2374300000	2130800000	2802100000	2876100000	2609600000	1872400000	2045700000	1677500000	1847900000	2253100000	1946000000
YPR124W	2197300000	1342300000	1885200000	2884800000	2870200000	2051700000	1600700000	906790000	1163800000	1223800000	1406700000	807710000
YNL118C	2761300000	3060900000	2567100000	2573600000	2861000000	2298400000	2318900000	2428100000	2267800000	2149700000	2288300000	2062400000
YOR272W	4349100000	4394000000	4165000000	3365500000	2850000000	3900400000	4908600000	4571700000	5121300000	3815100000	3538300000	4020500000
YCR028C-A	6248900000	7130100000	6671200000	2135800000	2841700000	6258500000	3092500000	2687700000	5193700000	5926100000	2665400000	5963800000
YCR077C	3228000000	3751200000	3037300000	2920300000	2835800000	3526300000	3037700000	3135200000	3446200000	2971600000	3097000000	3432700000
YHL007C	2644200000	2883500000	2489500000	2767800000	2827600000	2320800000	2724800000	3172800000	2482300000	2218800000	2743400000	2381400000
YPL063W	2608200000	2627900000	2692300000	3082800000	2823200000	2853800000	1804400000	1937600000	1753400000	1855300000	2278800000	1924200000
YOR276W	3881500000	4042300000	5646500000	2013200000	2816000000	3884000000	3536500000	3252300000	5198700000	3429700000	1979200000	3191700000
YNL243W	2568800000	2518200000	2354400000	2897200000	2804600000	2554800000	2376200000	2417500000	2203600000	2497700000	2679100000	2401800000
YEL042W	2442000000	2632200000	2447500000	2651600000	2802100000	2468500000	1831300000	1740000000	1609700000	1773800000	1811800000	1856600000
YDL198C	2231900000	2423700000	2259100000	2887900000	2800800000	2800600000	1680500000	1574900000	1501600000	1587900000	1576700000	1854000000
YDL015C	2406500000	2126300000	2447300000	2738400000	2799500000	2254000000	2846300000	2826900000	2981600000	2578500000	3196300000	2891600000
YCR030C	2411200000	2797400000	2394400000	2991300000	2785500000	2683400000	2588800000	2676800000	2242400000	2589100000	2950500000	2862500000
YDR011W	2583700000	2167600000	2618600000	2836200000	2778700000	2451900000	1965000000	1738400000	1970400000	1912000000	2123500000	2019600000
YER042W	1906600000	2549300000	2154900000	2239900000	2772100000	2151200000	1678200000	1761000000	1482300000	1650000000	1989600000	1693100000
YEL021W	2664800000	2568500000	2430800000	2969200000	2766300000	2309900000	2879900000	2427900000	2453600000	2144700000	2506000000	2321400000
YDL058W	2108700000	2684100000	2134400000	2440000000	2764000000	2061200000	2325500000	2494300000	1830900000	2055800000	2581100000	2027300000
YFL004W	2317000000	2357300000	2191700000	2815900000	2760400000	2420300000	2612000000	2581000000	2224300000	2089700000	2529900000	2188600000
YGL197W	2123100000	2549400000	2764400000	2468900000	2743800000	2675000000	2026600000	2052100000	1907900000	2232300000	2307300000	2054900000
YNL308C	3294000000	3863700000	3067400000	2448800000	2741800000	2657400000	2949200000	3349100000	3339900000	2693900000	2646600000	2903600000
YLR056W	2908900000	2637300000	2947400000	2653100000	2739000000	2577400000	7367500000	7871300000	7814900000	5760600000	6777400000	6960200000
YMR105C	2905900000	2211800000	2677200000	3340400000	2738600000	3493700000	2003900000	1554300000	2209300000	2220500000	1523100000	2151700000
YOR184W	3388100000	3100500000	3571100000	2835300000	2733900000	2748300000	2320400000	2311700000	2415400000	2169000000	2324500000	2261700000
YER082C	2754900000	2914900000	2663800000	2830800000	2724900000	2402200000	3330000000	3458300000	2879200000	2591100000	2820900000	2489900000
YDR033W	2052300000	1548000000	1859300000	3337200000	2718900000	3343800000	878500000	692030000	757970000	1696000000	1332900000	1588800000
YJL109C	3400500000	2368500000	3433900000	3284700000	2691700000	3844700000	3693800000	3156400000	5038800000	3915500000	3351100000	4301300000
YPL050C	1696000000	1575800000	1466500000	2824100000	2689300000	1625500000	2041600000	1985200000	1504100000	1454100000	2363200000	1407400000
YOR340C	2728500000	2853000000	2821400000	2898400000	2688700000	2564700000	3624600000	3576900000	3443000000	2690100000	2979700000	2825800000
YLL001W	2424500000	2324600000	2429800000	2623500000	2687300000	2785800000	3036100000	3276500000	3153500000	3586000000	3542600000	3387700000
YBL022C	2308900000	2545300000	2377900000	2853100000	2681400000	2516400000	1937500000	1852600000	1769100000	2112300000	2327800000	2094000000
YML124C	2547500000	2447000000	2409400000	2934300000	2674500000	2623300000	2661800000	2426200000	2400900000	2573300000	2967600000	2487200000
YGL195W	4128300000	2912400000	4281000000	3313100000	2668900000	4875500000	4197200000	3412500000	6422400000	5131900000	3694000000	5317200000
YPR062W	3393000000	4056800000	3840500000	2027200000	2660600000	3284600000	2913600000	3026300000	3093200000	3240600000	2432700000	3055900000
YPL012W	3254500000	2684300000	3481900000	3172000000	2651800000	3387000000	3775300000	3120900000	4277800000	3500600000	3045100000	3746400000
YNL088W	2500900000	2481700000	2709200000	2815000000	2648100000	2979800000	2476200000	2406700000	2843100000	2566600000	2420000000	2673900000
YKL216W	2784700000	3203100000	2771900000	2913100000	2646800000	2293500000	3069400000	3165200000	2561500000	2337900000	2718600000	2445300000
YMR083W	3304200000	2857300000	3047800000	2901700000	2644100000	3153300000	2094100000	1939900000	2056300000	2077700000	1952700000	2019000000
YLR208W	3501600000	2562300000	3580100000	3932800000	2640800000	3961100000	5938200000	5319800000	6831100000	6733500000	6073600000	7170400000
YOR254C	2137600000	1729200000	1916200000	2836100000	2637700000	2302400000	2102600000	2086800000	2084500000	2334500000	2966200000	2402500000
YNL031C;YBR010W	3156900000	3489400000	4624900000	2097300000	2633000000	4504200000	2520200000	2303300000	3981000000	2677100000	1472500000	2834700000
YNR050C	5036100000	4036200000	4788300000	3241000000	2632600000	3497400000	3110700000	2697300000	3305100000	2762300000	2313500000	2642300000
YER125W	3198700000	3212500000	3231100000	2685000000	2627400000	3156000000	2452200000	2426000000	2681700000	2692800000	2375100000	3011200000
YOR086C	2335300000	2675700000	2424000000	2663500000	2623600000	2440100000	2120500000	2190500000	1927300000	2365200000	2400700000	2258800000
YDL130W	4462500000	4508200000	5114400000	2188600000	2622400000	3618500000	3432300000	3354000000	4029200000	3297900000	3163200000	4043700000
YAR002W	2422200000	2996400000	2389400000	2365100000	2620600000	1957300000	2964000000	3356900000	2498800000	2371500000	2963300000	2258700000
YML012W	2903600000	2838500000	2842600000	2596400000	2613800000	2676100000	2186300000	2417700000	2286200000	2474900000	2849100000	2771700000
YML069W	2685600000	2715000000	2539800000	2993100000	2609400000	2841100000	2625200000	2296700000	2356800000	2733300000	2620100000	2529500000
YLR413W	1443700000	1722100000	1235400000	2083400000	2605200000	1309200000	3632100000	3728200000	2926600000	1661600000	3102300000	1904100000
YOR259C	3216600000	3105100000	3317100000	2654600000	2605000000	3308200000	3085300000	3014100000	3666900000	3649400000	2914800000	3306100000
YLR257W	3933900000	5125400000	4234700000	2377400000	2604400000	3678600000	3587200000	3938900000	4592300000	5453100000	4207600000	6318400000
YDL040C	3436500000	2879400000	3354900000	2982900000	2597400000	3291100000	2901200000	2664000000	3205900000	3000200000	2743000000	3031600000
YPR108W	2600600000	2109100000	2920400000	3182800000	2586100000	3659900000	2795600000	2695300000	3146500000	3399600000	3100700000	3013900000
YGL031C	6709400000	7312500000	7164500000	1956400000	2584500000	6146900000	2818000000	2908600000	7332700000	6013400000	2145500000	6502800000
YBR245C	2775200000	2759100000	2632500000	2878100000	2580200000	2692100000	2936000000	3158300000	2883500000	2916200000	3160300000	2973500000
YDR507C	2219000000	2594200000	2223800000	2540900000	2576300000	2185200000	1760400000	2032500000	1653000000	1877500000	2182200000	1772600000
YGL099W	2543100000	2644800000	2394700000	2808000000	2571800000	2220300000	3734600000	3831200000	2994900000	2415700000	2909500000	2466900000
YJR014W	1851000000	2370000000	2386400000	1905600000	2567700000	2207400000	2284400000	2352300000	2546100000	1927300000	1828200000	1926200000
YPL118W	1810100000	2299500000	1849900000	2438100000	2565000000	1982400000	1242100000	1305000000	1007100000	1146800000	1520400000	1271700000
YDL160C	2940500000	2823400000	2910000000	2529600000	2562200000	2869500000	2839800000	2773600000	3124000000	3004700000	2721800000	3336900000
YBR115C	3563600000	2690000000	3648000000	2988000000	2555800000	3163700000	2812800000	2409500000	3155000000	2608900000	2300900000	2482900000
YPR072W	2148600000	2624000000	2185500000	2411000000	2533700000	2237700000	2274400000	2559600000	2217900000	2151900000	2595100000	2120800000
YPL212C	2928100000	2942800000	2629700000	2612500000	2530000000	2816600000	3076200000	3112200000	3124300000	2703100000	2660200000	2841300000
YKL142W	1575400000	1683100000	2079300000	2001600000	2527900000	2559800000	1367200000	1303900000	1527300000	2344800000	2656700000	2661800000
YDR214W	2460500000	2206800000	2520900000	2902900000	2524400000	3162900000	2500900000	2291600000	2941200000	2887400000	2443100000	2741300000
YOL030W	2017800000	2134300000	1940100000	2952800000	2523000000	2362100000	2000900000	1929600000	1882300000	2194300000	2405100000	2274600000
YDR388W	2376200000	2450700000	2307400000	2513200000	2511300000	2408600000	2089300000	2247400000	1907500000	2269800000	2563700000	2354800000
YOR051C	2243700000	2038900000	2405900000	2790800000	2508100000	2457300000	3449100000	3271900000	3242100000	3063300000	3374800000	2945300000
YOR020C	1326800000	2359100000	1207600000	1883400000	2506700000	1737700000	1343400000	1399200000	841220000	1182900000	1519800000	1199500000
YPR004C	2191400000	2520700000	2279700000	2430800000	2505600000	2369900000	1426500000	1454900000	1439200000	1851600000	2084200000	1885300000
YKR016W	1998400000	2131700000	1939200000	2815500000	2504800000	2381600000	1412500000	1317500000	1218300000	1737700000	1794100000	1595300000
YLR390W-A	1635600000	2042200000	1934000000	2079800000	2503100000	2000600000	1953100000	2635700000	2352900000	3626300000	3428700000	3598600000
YGL040C	2906100000	2613800000	2869800000	3033600000	2501700000	2967200000	2395900000	2379900000	2653000000	2228500000	2311200000	2334500000
YMR086W	2507100000	3052500000	2529700000	2226000000	2499000000	2188700000	1619700000	1856600000	1548100000	1568600000	1770100000	1672500000
YPR016C	5136600000	4477100000	4579500000	2537700000	2497200000	3972800000	4028300000	3711100000	4639200000	4348000000	2561100000	3637200000
YJL177W	2699700000	3067300000	2663500000	2440200000	2489700000	2445200000	2010800000	2185200000	2016000000	2041000000	1603000000	2134400000
YGR082W	3290100000	2777500000	3495500000	2529300000	2478900000	3830400000	1820800000	1698900000	2289100000	2582800000	1740800000	2391000000
YPR129W	2239200000	2698500000	2438800000	2069200000	2474200000	2029000000	1940300000	2243700000	2030800000	2070700000	2320500000	2146500000
YFR010W	2212700000	2216000000	2259800000	2487200000	2473600000	2327400000	2785100000	2722100000	2498500000	2521200000	2870300000	2628300000
YNL231C	2429300000	1891800000	2709700000	3104400000	2464800000	3077600000	4158500000	3572300000	4527900000	3772500000	3850300000	4127100000
YAR015W	2703100000	2581800000	2391800000	2709700000	2462500000	2329400000	1984100000	1966000000	1751800000	1660000000	1691000000	1546800000
YDL225W	2346000000	2585900000	2189900000	2406200000	2451800000	2209000000	2507600000	2668600000	2231000000	2335500000	2433000000	2257900000
YOR116C	3003800000	3086900000	2977700000	2634900000	2448300000	2760800000	3065300000	3004100000	3332200000	2829200000	2643200000	2753500000
YBL041W	2360200000	1945300000	2316300000	2464600000	2444400000	2214600000	2677400000	2615300000	2513600000	2256600000	2534800000	2240600000
YPR165W	2890400000	2668000000	3171200000	2534400000	2443000000	4011900000	1975400000	1966200000	2684600000	4102000000	1979400000	4111600000
YDR346C	2376900000	2087700000	2326100000	2313800000	2439300000	2300500000	2483900000	2406600000	2634800000	2690500000	2452000000	2478500000
YLL048C	2134400000	1793200000	2146200000	2661900000	2437400000	2371800000	4539300000	4336200000	4492500000	3864100000	4559500000	4061200000
YNL030W;YBR009C	1644200000	2469300000	1611800000	1845300000	2427200000	2052300000	1572500000	1843300000	1026700000	1011000000	1167300000	758460000
YDR175C	1689700000	2447400000	2065100000	2072300000	2426700000	1913000000	992490000	1105400000	994910000	1212500000	1314400000	1109800000
YPL146C	2555000000	3388100000	2741800000	2220000000	2419600000	2147600000	2555600000	2687100000	2922800000	2533100000	2218400000	2264600000
YER052C	2314600000	2094300000	2403800000	2414900000	2412300000	2519300000	2818800000	2930200000	3115700000	2619300000	2878500000	2814400000
YNL186W	2400200000	2921600000	2548300000	2375800000	2412100000	2235900000	2750400000	3042200000	2777500000	2227600000	2458900000	2178700000
YKL201C	2369900000	2639500000	2271500000	2457500000	2408000000	2162500000	1334900000	1629000000	1482700000	1997000000	2405200000	2124700000
YFR052W	1598700000	1719200000	1700500000	2391200000	2407400000	1879000000	2410400000	2987600000	2091400000	2084500000	3204200000	2110200000
YBR172C	2101500000	2585100000	2115700000	2306300000	2395400000	1998300000	2283900000	2506000000	1816200000	1809200000	2119400000	1832200000
YOR056C	2341200000	2529200000	2491000000	2353300000	2395400000	2252200000	3040200000	3089800000	2873700000	2339400000	2476300000	2389900000
YER080W	2243700000	2449700000	2243300000	2690800000	2394000000	2312500000	1726900000	1646800000	1452900000	1877700000	2028900000	1802700000
YGR207C	1680100000	2015600000	1903300000	1969300000	2393500000	1897600000	1385900000	1652900000	1265000000	1467200000	1835700000	1448300000
YCL017C	2460900000	2373900000	2581100000	2530900000	2389800000	3102700000	1598800000	1434800000	1765900000	2307100000	2043400000	2337100000
YOR128C	2882700000	2373000000	2902300000	2660800000	2384800000	2805900000	2766700000	2403500000	3134600000	2801000000	2435100000	2431000000
YGL097W	2980300000	3387600000	3027800000	2561300000	2384200000	2947400000	2582800000	2293200000	2770700000	2594100000	2252000000	2752900000
YJL121C	2301600000	2614200000	2445700000	2277100000	2381500000	1921100000	1842000000	2075900000	1802200000	1625400000	1691300000	1603400000
YDR398W	2823800000	2438300000	2637400000	2283400000	2380000000	2331200000	3062600000	3047300000	3465900000	2599400000	2346100000	2616300000
YIL094C	3513600000	2874400000	3106600000	2618000000	2378700000	2698500000	2209800000	1949900000	2542800000	2589900000	2225200000	2182700000
YOR326W	2710300000	2287500000	2662500000	2497800000	2375000000	2918900000	2286400000	2103500000	2632300000	2557600000	2403100000	2650700000
YER055C	2951300000	2473400000	2912400000	2975700000	2372700000	2882000000	2066700000	1945800000	2635800000	2465300000	2002200000	2470700000
YHR200W	1704500000	1877000000	1573800000	2369600000	2363600000	1906800000	2395000000	2497000000	1884700000	2048400000	2906000000	2099900000
YER151C	2159800000	2216600000	2039700000	2391600000	2361700000	2048200000	2444200000	2619000000	2177400000	2050300000	2421800000	2043900000
YOR042W	2955900000	3501700000	2981900000	2202000000	2360100000	2790000000	2090600000	2154700000	2297800000	2935900000	2502500000	3135300000
YEL051W	3098300000	3809700000	3539600000	2081100000	2358200000	3032000000	2512700000	2831700000	3183100000	2834900000	2241100000	2813200000
YHR108W	2606000000	2282600000	2351400000	3003800000	2358200000	2432200000	2327800000	2525000000	2292100000	2107100000	2433400000	2060600000
YLR106C	2947700000	2321500000	2956700000	2918800000	2356300000	3018000000	7184100000	6676100000	8661500000	6022300000	5757400000	6315000000
YJL148W	3577700000	4336200000	3479900000	2036000000	2352900000	3032700000	2753000000	2981600000	3737000000	2969800000	2028200000	3198500000
YNL087W	2455000000	2537400000	2486800000	2814100000	2348100000	2397700000	3052500000	2876700000	2949300000	2528700000	3010200000	2712300000
YDR120C	2738800000	2726900000	2738300000	2389600000	2334700000	2204300000	2823400000	2816400000	2787300000	2175200000	2413300000	2180000000
YGR186W	2049300000	2380800000	1930400000	2232800000	2322000000	1717000000	2339900000	2725600000	1978000000	1873100000	2464700000	1787800000
YDL168W	2060900000	1976900000	1902100000	2666000000	2319600000	2253000000	2627700000	2265900000	2475400000	2908400000	2793900000	2836900000
YJR072C	2068200000	2319600000	1977100000	1990400000	2318500000	1935700000	2588500000	3008400000	2630600000	2328700000	2459400000	2294100000
YJR065C	2618800000	2692300000	2373500000	2552800000	2317400000	2533200000	2018400000	1742100000	2108200000	2653400000	2221100000	2457200000
YKL082C	3102400000	3796000000	3336500000	2070700000	2313200000	2792200000	2637700000	2859300000	3568100000	2816800000	2187700000	3009100000
YDR174W	3400600000	4170300000	3254300000	2485100000	2304600000	2198200000	3450000000	3900600000	3394900000	2804600000	2494200000	2723300000
YKL179C	2171600000	2454800000	2132600000	2258600000	2300300000	1973500000	1936600000	2158100000	1817700000	2066900000	2397500000	2080600000
YEL024W	1874900000	1894300000	1692200000	2107800000	2295500000	1855500000	1261200000	1039600000	822120000	1255000000	1123700000	1062500000
YML001W	1726500000	1674000000	1496400000	2709800000	2294200000	1660600000	2163100000	2268500000	1608600000	1575700000	2233200000	1459400000
YGL256W	1051600000	835720000	954410000	3163300000	2292500000	2136700000	1996000000	911280000	693750000	616540000	532370000	590560000
YDR170C	2255600000	2216300000	2327300000	2537700000	2290500000	2550700000	1876500000	1899000000	1845700000	2057000000	2006400000	1953700000
YCL064C	3316600000	3167300000	3532100000	2748300000	2289900000	2941500000	5218800000	4462100000	6023900000	4520200000	4116600000	4515900000
YNL131W	3753000000	3892700000	5315200000	1875700000	2283200000	4560200000	1522800000	1424600000	2523000000	3260400000	1426100000	2958900000
YJL033W	2531600000	2693900000	2712800000	2176000000	2277800000	2154300000	3150500000	3453400000	3301700000	2343000000	2682300000	2366500000
YMR024W	2507000000	2396000000	2658200000	2330900000	2276000000	3139200000	1086900000	1018100000	1318900000	1768800000	1587000000	1818600000
YDR145W	1879300000	2162500000	1857800000	2023000000	2274500000	1605600000	1939700000	2162400000	1585300000	1609800000	2104400000	1500500000
YBR155W	1996700000	2324700000	1975800000	2124000000	2268800000	1523900000	2541700000	2719100000	2000000000	1714600000	2158200000	1616100000
YGR165W	1639100000	1975000000	1609400000	2119900000	2266600000	1822800000	988550000	1035300000	776880000	1043000000	1348000000	1044900000
YBR034C	2491400000	2290300000	2705300000	2564600000	2262900000	2703100000	2831600000	2380000000	3338100000	2758800000	2806600000	2860600000
YLR009W	3211300000	3180700000	3649600000	1804600000	2261900000	3109500000	3260800000	3788900000	4306700000	3346300000	2241100000	4062000000
YLR229C	1943200000	2182300000	2037300000	2301300000	2253400000	2123800000	3908600000	3973400000	3395800000	3154500000	3918800000	4472700000
YLL011W	2131500000	2228600000	2142300000	2284600000	2248500000	1782700000	5345400000	5447000000	4322400000	3276500000	4082200000	3214800000
YKL211C	2646400000	2244500000	2680300000	2571200000	2238800000	2687300000	2746100000	2571400000	3362600000	3019200000	2650100000	2977900000
YPR137W	2522300000	2557500000	2427700000	2285400000	2238500000	2087500000	2785000000	2799700000	2590800000	2142900000	2240300000	2058600000
YMR129W	2034900000	2103900000	1997400000	2500300000	2236100000	2199400000	2007900000	1987200000	1876200000	1855000000	2150900000	1746800000
YJL158C	2682300000	2791400000	2590700000	1899300000	2235200000	1839000000	1775100000	1778400000	1270800000	2605000000	2234900000	2495600000
YML123C	1765500000	1461400000	1723300000	2378800000	2229200000	2407800000	1338000000	1388400000	1461500000	1162000000	1529200000	1177300000
YLR347C	3350400000	3015100000	3304900000	2508400000	2227800000	3192400000	5644200000	4861300000	6715000000	6006100000	4701300000	6349200000
YOR232W	2172600000	2410000000	2975100000	1845700000	2227600000	3258100000	1701700000	1788200000	2248200000	1792400000	1445200000	1812200000
YGL092W	1946100000	2088900000	2013100000	2205800000	2224200000	1857100000	2166900000	2174500000	1821400000	1818800000	2324100000	1909500000
YDL131W	2561300000	2868600000	2359200000	1995700000	2221500000	2305000000	2073400000	2157400000	2247900000	1942600000	1770800000	2175100000
YHR158C	1924300000	2123600000	1862200000	2128400000	2220800000	1762600000	1730000000	1926700000	1516900000	1650100000	1966700000	1590500000
YOR165W	1820800000	1730700000	1723600000	2390900000	2214200000	1961100000	1988100000	1871400000	1823100000	1897300000	2156400000	1949700000
YDL174C	2276200000	2467800000	2301400000	2527400000	2213600000	2241300000	1438500000	1310900000	1282700000	1622700000	1650300000	1496100000
YFL005W	2089800000	2012300000	2202500000	2639900000	2206800000	2591300000	2344000000	2195500000	2461200000	2436600000	2588700000	2820200000
YBR035C	1861000000	2338800000	1999500000	1970600000	2205100000	1949600000	1759700000	1845400000	1409700000	1931000000	2051600000	1852300000
YHR037W	2084200000	1878300000	2077500000	2410600000	2196600000	2708400000	1265200000	1096100000	1453800000	2233700000	1872900000	2130600000
YLR309C	1744300000	2100600000	1655500000	1933500000	2182200000	1637700000	3517100000	4044300000	2929800000	2764700000	3696000000	2983000000
YKL127W	2286800000	2298400000	2219300000	2526500000	2175400000	2451700000	2129700000	2005700000	2503900000	2359300000	2317300000	2480400000
YOR243C	1948200000	1982900000	2153400000	2366500000	2171400000	2102200000	2695600000	2491900000	2302700000	2100300000	2323000000	2070300000
YCL011C	1996800000	2383600000	1842800000	2077700000	2168300000	1737800000	2481700000	2666400000	1992300000	1850000000	2279600000	1757100000
YER136W	2605600000	2159700000	2681200000	2452000000	2162700000	2596800000	2213800000	2045100000	2685500000	3336400000	2617300000	3132300000
YEL037C	1843300000	1672200000	1554800000	2186100000	2162200000	1736700000	2127200000	2673000000	2084000000	1722200000	2188300000	1834400000
YKL157W	2255700000	1865900000	2298000000	2449000000	2161700000	2851500000	1894700000	1780200000	2223300000	2784100000	2100800000	2660200000
YIL109C	2860700000	2090200000	2932900000	2534600000	2149300000	3656900000	2137600000	1942500000	3228500000	3439400000	2673100000	3746200000
YGR245C	2471200000	2812500000	2377800000	2052600000	2148500000	2142600000	2381900000	2342400000	2542000000	1998100000	1899500000	1949100000
YML025C	1620400000	1609700000	1551000000	2176400000	2142100000	1739200000	1181600000	1201300000	1027300000	1179100000	1497100000	1120100000
YJL171C	1204300000	1347100000	1107300000	1898700000	2140900000	1209200000	1246900000	1280000000	999360000	2364000000	2889400000	2014600000
YNL154C	2086100000	2027200000	2052700000	2083500000	2138000000	2013200000	2024300000	2242000000	1941200000	1804700000	1931300000	1865400000
YHR205W	2228500000	2443300000	2429900000	2258900000	2136000000	2094900000	2207500000	2319800000	2142800000	2020400000	2379400000	2125000000
YJR144W	1879900000	2305800000	1934000000	2131500000	2135200000	2003800000	1489300000	1601600000	1345100000	1511700000	1732500000	1487900000
YBL054W	1736200000	2202400000	1742700000	2075200000	2134300000	1617100000	2412400000	2618500000	2071000000	1582100000	1758300000	1509700000
YMR091C	1852700000	2118600000	1719500000	2207500000	2133300000	1585200000	2146500000	2223500000	1682700000	1544400000	2192000000	1521000000
YER007C-A	1682200000	1941700000	1669800000	1771000000	2129600000	1462100000	2023500000	2051400000	1639900000	1456400000	1812500000	1444800000
YML128C	998300000	1183500000	1085500000	2070800000	2128000000	1163900000	561640000	469320000	230560000	357180000	530010000	257990000
YMR214W	1759300000	1917900000	1687400000	1867700000	2127500000	1783600000	1774700000	1916500000	1723800000	2520800000	2354900000	2529700000
YDR368W	2330900000	1957000000	2241300000	2407600000	2118500000	2453700000	2499700000	2434200000	2665300000	2796800000	2746900000	2926300000
YOR120W	1588800000	1778900000	1577500000	2264800000	2118200000	2232700000	885100000	700580000	635310000	903580000	593680000	897140000
YOR317W	1447500000	1291900000	1508800000	2412600000	2111300000	2623500000	2009300000	2088700000	2313800000	3795200000	3581500000	3518100000
YKR043C	2698500000	2533300000	2524700000	2287200000	2099900000	2419100000	2746000000	2686800000	2732600000	2952800000	2504000000	2938800000
YKL040C	1456400000	1482700000	1366200000	1755000000	2097300000	1421600000	1652900000	1772500000	1300200000	1500500000	1850400000	1490700000
YDL153C	2139700000	2447000000	2030000000	2215100000	2096600000	1680800000	2594000000	2765800000	2244900000	1919900000	2221300000	1772300000
YNL005C	1450000000	1773300000	1458700000	1914700000	2094200000	1579800000	882550000	1005900000	710210000	1033700000	1335700000	999770000
YDL121C	1833200000	2212900000	1736500000	2261000000	2093800000	1679100000	2198500000	2315600000	1782600000	1547400000	2361900000	1840800000
YBR023C	1132100000	1159200000	1151500000	2204200000	2092200000	1518300000	1455000000	1555700000	1256800000	2104600000	2578800000	2132400000
YBL091C	2192700000	2361200000	2128400000	2014200000	2086900000	2166900000	1859900000	1961800000	1878300000	1859300000	1924100000	2052900000
YDL150W	2551700000	2751900000	2689500000	1843700000	2084700000	2098200000	2281900000	2674800000	2538000000	2246000000	2072000000	2482700000
YIL070C	1826900000	1964500000	2253100000	2047100000	2058600000	2333000000	800020000	785110000	810270000	1178800000	1078700000	1157200000
YDL060W	2726300000	2660500000	2626600000	2225500000	2057000000	2609200000	2885200000	2689100000	3496400000	2834900000	2341300000	2808300000
YPL049C	1692600000	1853900000	1591400000	1817200000	2055800000	1507700000	1661100000	1816500000	1387900000	1468900000	1753400000	1356400000
YPL173W	1711800000	2189100000	1902600000	1830000000	2055400000	1994000000	928580000	1099000000	863070000	1314100000	1443200000	1265800000
YGL171W	2155300000	2009700000	2131600000	2444200000	2049600000	1776900000	3590600000	3534900000	2960800000	2091600000	2797700000	2316100000
YMR215W	2043500000	2357000000	2162900000	1915300000	2045900000	1900900000	1820000000	1946700000	1675300000	1379700000	1519600000	1504300000
YKL077W	1737800000	2135200000	1761200000	1658200000	2045500000	1495800000	1623200000	1609700000	1382100000	1363900000	1321000000	1415300000
YER031C	1505700000	1788900000	1734200000	2230900000	2044000000	1834900000	1671400000	1695400000	1514000000	1806000000	2023100000	1529900000
YKR056W	1884900000	2168700000	1925100000	2050800000	2041300000	1622200000	2401200000	2562900000	2221600000	1813500000	1977400000	1761000000
YLL040C	2374600000	2274500000	2399300000	2201100000	2038900000	2704300000	4603500000	3966000000	5236800000	4951900000	4449900000	5095600000
YMR089C	1373800000	1369200000	1417700000	1759300000	2030500000	1562800000	929370000	941290000	803350000	1078900000	1238500000	1099800000
YPR160W	1993700000	1472600000	2045000000	2377900000	2027400000	3202400000	1280800000	1019700000	1294900000	1529100000	877100000	1574500000
YLR017W	2517100000	2465900000	2727400000	2208600000	2027100000	2412700000	5586400000	5165200000	5702600000	4315300000	5122900000	4835300000
YHR135C	1797100000	1989200000	1849300000	1918700000	2022600000	1723900000	1622800000	1803800000	1447200000	1463800000	1747300000	1442100000
YPR159W	1605500000	1822700000	1568300000	2074600000	2022300000	1787800000	1478100000	1544400000	1456000000	1872000000	2082200000	1942500000
YML100W	2059700000	2135200000	2136000000	2007800000	2012800000	2295300000	799360000	797610000	749730000	1597300000	1257500000	1689900000
YPL154C	1448900000	1441900000	1272300000	2326800000	2010600000	2275900000	1421800000	1168400000	1342200000	2805300000	2509400000	2605400000
YMR261C	1586200000	1526300000	1542200000	2077200000	2009300000	1963200000	1241000000	1161800000	1168300000	1606400000	1652300000	1609800000
YLR409C	2310900000	2145200000	2420800000	1910500000	2005600000	2084100000	3361300000	3097400000	3563700000	2645300000	2640300000	2734500000
YOR251C	1795400000	1961000000	1900200000	1875600000	1999300000	1820500000	2067900000	2125700000	1971100000	1782800000	2003400000	1973400000
YBR267W	1961700000	2142200000	1958000000	1688900000	1983800000	1537500000	2225500000	2385100000	1893600000	1439500000	1727300000	1746400000
YOL059W	2641600000	2135700000	2722100000	2332300000	1983700000	2784600000	3653200000	3321300000	4535200000	3709900000	3220300000	4078500000
YAL042W	1813700000	1942900000	1941400000	2453800000	1981200000	1946900000	1682500000	1512000000	1428800000	1491800000	1997100000	1632900000
YOR260W	1884200000	1711900000	1820500000	2151100000	1978300000	1858200000	2534200000	2307800000	2217700000	1857200000	2129500000	1819700000
YOL064C	1667800000	1612700000	1628500000	2186100000	1976600000	1804300000	2335000000	2211700000	2224400000	2152400000	2354700000	2230300000
YKR092C	2534600000	3562900000	3313400000	1749400000	1972400000	2311000000	2132900000	2500700000	2464200000	2115300000	1520500000	1892500000
YIL126W	1829300000	2054700000	1912400000	2076800000	1963900000	1826100000	1958500000	1992900000	1827600000	1657800000	1869500000	1700500000
YER057C	958650000	1268400000	990820000	1683400000	1963800000	1165500000	1550900000	1499000000	766090000	1051700000	1605000000	882630000
YMR295C	2244400000	1943700000	2834600000	1588000000	1954500000	2853900000	1215400000	1330800000	1901700000	2302600000	1386700000	2820400000
YJL186W	1712500000	1555400000	1519800000	2163300000	1953200000	2000500000	1602100000	1522400000	1606200000	1669400000	1859900000	1831700000
YDR211W	1853400000	1892400000	1816700000	2196200000	1951400000	1761600000	2449900000	2337100000	2163700000	2008700000	2266300000	1878100000
YOR098C	1852300000	2217200000	1880400000	1878600000	1948900000	1737000000	1774100000	1852100000	1631100000	1593800000	1865600000	1656000000
YLL034C	2117200000	2100100000	1992200000	2063600000	1942600000	1893900000	5472700000	5237200000	5143200000	3859600000	4339200000	3998800000
YPL032C	1950100000	2154500000	1974300000	2118400000	1938300000	1891600000	1678100000	1566400000	1523700000	1587100000	1870500000	1574100000
YIL138C	3172100000	2703800000	4790500000	1391800000	1925300000	4292700000	1463000000	1306700000	3953000000	4588200000	1561300000	4170300000
YER168C	2390200000	2192500000	2340400000	2064600000	1924000000	2153800000	2771300000	2466200000	2892700000	2489800000	2473400000	2928700000
YLR301W	2296700000	2180300000	2014500000	2040000000	1917200000	1947700000	4509400000	4461100000	4320500000	4144300000	4044900000	4058700000
YDR508C	1789500000	1890000000	1593600000	1842300000	1914400000	1604100000	1883900000	1947300000	1619000000	1468700000	1855200000	1673300000
YDL072C	1209100000	1013300000	1209900000	1847400000	1912200000	1719000000	1372600000	1117000000	1097000000	2240100000	2216500000	2504600000
YMR093W	2622200000	2335800000	2552100000	2054500000	1909500000	2213100000	2802700000	2668300000	2942800000	2496500000	2122200000	2429300000
YNL166C	1626200000	2109600000	1578300000	1526400000	1907600000	1513700000	1342500000	1454700000	1278400000	1232800000	1315400000	1382900000
YML086C	2020800000	1845900000	2095400000	1993700000	1903600000	2393400000	1360100000	1338900000	1677000000	1658100000	1451400000	1831300000
YDR496C	2264000000	2221100000	2186100000	2160300000	1900100000	1982100000	3181200000	3091300000	2915500000	2104200000	2380800000	2513300000
YOL098C	2301500000	2400800000	2483900000	1999700000	1898900000	2508100000	2281700000	2316600000	2822400000	2815800000	2448600000	2885900000
YDR348C	1736700000	2184500000	1754200000	1647900000	1891500000	1521000000	1476600000	1666800000	1350200000	1543300000	1629700000	1461800000
YGL167C	1553000000	1553700000	1530200000	1881900000	1887200000	1723600000	1592900000	1637400000	1660000000	1853800000	1950400000	1987600000
YDR427W	1731600000	1291800000	1637100000	2098500000	1875900000	2047100000	2111300000	1848400000	2232600000	2246100000	2236700000	2513800000
YOR195W	1384000000	1605400000	1311600000	1701900000	1874500000	1470800000	1493300000	1644600000	1238200000	1410400000	1831300000	1329800000
YCR016W	2449700000	2618900000	2285800000	1954700000	1869400000	2137500000	2787200000	2685100000	2859600000	2262800000	1872500000	2510000000
YJL001W	1316700000	1416100000	1023500000	1935100000	1868600000	1635100000	1641000000	1799300000	1583400000	1646900000	2199700000	1969000000
YGR167W	2035300000	1655700000	3170300000	1297200000	1865500000	2683900000	1236700000	1343900000	2417500000	2467700000	1300000000	2841700000
YPL127C	2400800000	2669900000	2184800000	1380000000	1856000000	2159600000	946300000	951510000	1210700000	1422100000	792170000	1299400000
YGR090W	2148800000	1675400000	2253900000	2450000000	1850400000	2502900000	2098600000	1817100000	2448600000	2133800000	1932100000	2125500000
YDL178W	2043400000	2277500000	2194900000	1820400000	1849300000	1686000000	1323300000	1342400000	1411600000	1477600000	1565900000	1519400000
YHR051W	848050000	1243600000	883580000	1325600000	1846700000	1361400000	817670000	695470000	559520000	723170000	892560000	552210000
YML035C	1853300000	1963500000	2032000000	1953800000	1846400000	1803400000	1738700000	1910100000	1751900000	1600900000	1767400000	1571000000
YDL052C	2005500000	2350400000	2229000000	1970400000	1843900000	2095000000	1799500000	2097100000	1893400000	1933000000	2033600000	2337500000
YML048W	1641700000	1378800000	1464600000	1990200000	1840200000	1545400000	2256200000	2118600000	2051300000	1774000000	2161900000	1816000000
YMR015C	1922300000	1658400000	2075500000	2106700000	1832400000	1985100000	2458300000	2337800000	2925000000	2395300000	2271400000	2447400000
YIL118W	1370400000	1447100000	1355000000	1806700000	1829900000	1439900000	1756400000	1872500000	1539600000	1526000000	1922300000	1466300000
YOR057W	2045800000	2345000000	2296600000	1767800000	1827400000	1910400000	1806900000	1992100000	2323800000	2189700000	1899000000	2196100000
YPL199C	1785200000	2034400000	1850400000	1742800000	1823500000	1762400000	1525800000	1761000000	1493400000	1356300000	1670800000	1401600000
YNL141W	2177300000	2140600000	2213200000	2036000000	1817800000	1801500000	2791500000	2664800000	2529300000	1820400000	2037700000	1737900000
YEL013W	1713300000	1357200000	1796300000	1701800000	1815100000	1851900000	1407900000	1395500000	1581400000	1612000000	1756100000	1878100000
YEL002C	1717000000	1356200000	1488300000	1978800000	1814800000	1524200000	1676100000	1509700000	1323900000	1472300000	1744100000	1520700000
YDR483W	1533300000	1429700000	1483000000	1947000000	1814500000	1744900000	1492400000	1673500000	1589200000	1403500000	1691300000	1548200000
YPL190C	1591500000	1799300000	1564200000	1825600000	1811100000	1497700000	1791200000	1765900000	1456900000	1504700000	1770700000	1584800000
YKL024C	1701600000	1862200000	1802200000	1634200000	1806600000	1592800000	1606100000	1600000000	1411700000	1379500000	1450800000	1485100000
YDR405W	1104100000	1517100000	1264300000	1621900000	1806200000	1456200000	730930000	812600000	674210000	794650000	919530000	776650000
YLR069C	1452900000	1509100000	1617000000	1732500000	1802000000	2112700000	1543800000	1499800000	1834900000	2028600000	1977700000	2122700000
YPR104C	1603500000	1772000000	1633200000	1954200000	1796000000	1313500000	1587600000	1600300000	1276500000	1236600000	1454400000	1183400000
YPL105C	1469200000	1644800000	1368400000	1621100000	1793600000	1341100000	1499500000	1565600000	1265100000	1144900000	1515700000	1170100000
YPR187W	2766600000	2421100000	3344100000	1339400000	1781000000	3360800000	1793600000	1379400000	3338800000	2670300000	1156000000	2509600000
YDR141C	2241300000	1755600000	2853700000	2099900000	1769300000	3032400000	1691700000	1764200000	3220300000	2859600000	2204900000	2657700000
YHL004W	1670900000	1851200000	1502800000	1884800000	1767800000	1724000000	894820000	861740000	777560000	1024200000	1084400000	1089100000
YPR173C	1530600000	1795200000	1556800000	1762000000	1767200000	1429600000	1675700000	1825300000	1455100000	1442800000	1813300000	1515100000
YNL160W	1781700000	2246600000	1476300000	1670600000	1764700000	1599500000	626230000	591890000	493110000	797350000	594620000	769490000
YDR148C	1305300000	1520200000	1328600000	1737000000	1762600000	1710200000	987000000	874400000	674100000	866190000	932790000	877520000
YJR125C	1673400000	1745000000	1759300000	1596500000	1762100000	1581700000	1252400000	1433300000	1494200000	1512600000	1558900000	1380400000
YMR169C	1439100000	1434200000	1201700000	1888700000	1758300000	1650500000	363520000	313080000	337160000	1716100000	1249600000	1588100000
YML085C	2021800000	1666100000	2052800000	2021900000	1753700000	2132100000	1514900000	1374500000	1535400000	1748300000	1673400000	1687500000
YJL074C	1264000000	1364900000	1245400000	1724000000	1752700000	1356600000	1284100000	1360000000	1058200000	1162700000	1512500000	1142800000
YNL137C	1200700000	1244900000	1220000000	1738500000	1751800000	1234500000	721370000	672490000	566640000	729100000	1021000000	653410000
YLR248W	1283500000	1551600000	1513100000	1672100000	1751600000	1529800000	2424600000	2316500000	2169500000	2407300000	2475900000	2302300000
YHR001W	1973700000	2136700000	1888700000	1695700000	1742300000	1759400000	1631700000	1526800000	1582300000	1649400000	1575900000	1733300000
YNL252C	1286900000	1592500000	1269100000	1675900000	1741800000	1400300000	788510000	886450000	695980000	830800000	1000200000	922310000
YBR244W	2323700000	2740100000	2400600000	1444800000	1737300000	1581300000	2033800000	2030800000	1943900000	1322300000	1247000000	1307500000
YKR066C	1578200000	1905200000	1651200000	1677900000	1736300000	1632100000	1531300000	1588300000	1290600000	1449400000	1827200000	1520200000
YBR111C	1452400000	1644100000	1603000000	1412300000	1736000000	1585900000	1287900000	1448000000	1329300000	1417400000	1576100000	1434000000
YDL125C	1392000000	1774100000	1486200000	1593000000	1735000000	1214700000	2124300000	2077400000	1507200000	1247900000	1378700000	1031300000
YPR020W	835800000	993230000	770610000	1419000000	1735000000	907230000	684730000	566100000	390130000	480110000	674860000	350820000
YPL094C	764480000	807950000	827480000	1878400000	1730200000	980980000	1617100000	1751200000	963310000	1074700000	2291200000	1059900000
YFR033C	3718900000	5034300000	3722000000	1379900000	1720800000	3199800000	893300000	759400000	1565100000	2374500000	983280000	2331100000
YCR009C	1790200000	1690900000	1803100000	1779200000	1720300000	1753100000	1544200000	1489500000	1380100000	1661000000	1623300000	1688900000
YMR109W	1949000000	1736100000	1831400000	1930600000	1718500000	1959100000	1557800000	1544900000	1649900000	1739600000	1746900000	1790500000
YOR091W	1797600000	2034000000	1763100000	1542100000	1716300000	1418800000	1659800000	2021200000	1762900000	1519200000	1501300000	1651900000
YLR384C	2080200000	1804800000	2238700000	2127600000	1714100000	2068700000	4799400000	4128000000	4936900000	4186700000	4010600000	4010200000
YDR251W	1236700000	1463800000	1193600000	1515400000	1713600000	1333300000	1019000000	1099800000	923540000	1246700000	1526300000	1229300000
YGL129C	1431300000	1440500000	1497700000	1782000000	1712100000	1718000000	912840000	877330000	771030000	942730000	1041000000	939290000
YHR065C	2348200000	2087100000	2365600000	1870400000	1703000000	2002900000	2531500000	2456000000	2844100000	2258600000	1957600000	2123100000
YER155C	1795100000	1966200000	1936500000	1803600000	1703000000	1847200000	1688000000	1784300000	1801400000	1721100000	1791700000	1835500000
YCL031C	1324500000	1542700000	1253200000	1653400000	1701300000	1098900000	1466700000	1672500000	1204900000	1067900000	1317100000	1069000000
YBL064C	1011000000	1186400000	1028900000	1650300000	1700900000	1379900000	1027300000	872610000	760370000	1107400000	1329300000	1058000000
YDR430C	1803100000	1675200000	1885000000	1836400000	1700700000	2054900000	1160600000	1165600000	1426000000	1620500000	1459300000	1488100000
YAL036C	2220800000	1912400000	2299000000	1968400000	1698300000	2298500000	2380600000	2284400000	2871300000	2190900000	1922200000	2296700000
YFR024C-A	1603800000	1830400000	1483600000	1543700000	1694600000	1578100000	1301500000	1460000000	1279700000	1464100000	1536100000	1471100000
YKR014C	1369400000	1468800000	1192700000	1829000000	1694100000	1329800000	1391900000	1451500000	1056800000	1279000000	1604100000	1196700000
YBL017C	1349900000	1341800000	1316500000	1915300000	1693600000	1487800000	1232500000	1255600000	1151700000	1370000000	1676600000	1326500000
YNL117W	867230000	726340000	988950000	1947500000	1691400000	1768300000	1240400000	723830000	517060000	933640000	546160000	605620000
YJR069C	1871400000	1861800000	1837500000	1572100000	1689700000	1414300000	2211900000	2022800000	2089100000	1802800000	2003700000	1702400000
YNL292W	1582000000	1642300000	1483500000	1724900000	1683200000	1428400000	2091300000	2153300000	1580700000	1467000000	1662700000	1439900000
YFR032C-A	2383400000	2006000000	3061300000	1573900000	1681400000	2897100000	2546100000	2076000000	2560000000	2139000000	1366600000	2955600000
YNL185C	1187600000	1409000000	1406700000	1335200000	1675300000	1414300000	796260000	878140000	710820000	745490000	877270000	707930000
YDR074W	1730500000	1560600000	1624300000	1730200000	1673100000	2060500000	979030000	924320000	1037600000	1700300000	1488500000	1775300000
YDL147W	1441500000	1151600000	1453700000	1879900000	1672900000	1711700000	1695000000	1609800000	1718400000	1936600000	1822000000	1867300000
YAR002C-A	1701400000	1367900000	1824000000	1706200000	1669700000	2011700000	1464500000	1287700000	1711200000	2124500000	1957400000	2279100000
YLR206W	1847200000	1871300000	1609300000	1807100000	1662400000	1706800000	3031300000	3188900000	2624100000	2756700000	3055900000	2940600000
YLL050C	2785200000	5048400000	4581400000	1415700000	1661300000	2425800000	3113800000	3750800000	4796300000	10533000000	2904400000	5136500000
YDL074C	1549400000	1578300000	1508500000	1917800000	1660900000	1363800000	1881300000	1914800000	1553100000	1309900000	1685300000	1274400000
YLR295C	1959500000	1957500000	1939400000	1169200000	1658400000	2074100000	1479300000	1102600000	1354200000	2251300000	1759900000	1727200000
YNR017W	763420000	1144000000	803770000	1515300000	1656100000	910200000	1175800000	1085900000	650480000	620400000	1089500000	660010000
YDR494W	1249000000	1418900000	1208100000	1484400000	1655100000	1364700000	702000000	787380000	603110000	820160000	978710000	823580000
YMR153W	1495200000	1672000000	1384100000	1712600000	1654800000	1419600000	1807500000	1838800000	1302200000	1193800000	1703700000	1177200000
YOR261C	1782200000	1413100000	1772200000	1924200000	1654400000	2079100000	2136000000	1845300000	2197600000	1992400000	2066400000	2040300000
YHR005C	1712600000	1563600000	1636800000	1548000000	1642800000	1459000000	1613100000	1714400000	1679800000	1219900000	1390700000	1309400000
YKR018C	1657300000	1444600000	1606200000	1771500000	1640600000	1854500000	1912200000	1644500000	1761000000	1912000000	1951500000	2096900000
YDR513W	1353100000	1773100000	1369300000	1325400000	1639100000	1478300000	1039400000	1124700000	901310000	1263500000	1176300000	1207100000
YLR406C	1303900000	3020400000	1636900000	1150300000	1638400000	2054600000	1828600000	1944800000	1535300000	1658300000	1629000000	2160700000
YPL126W	2288200000	1751300000	2373700000	2239800000	1636500000	2349900000	2691400000	2090100000	3165800000	2401300000	2267800000	2688400000
YLR380W	2007900000	1813000000	1794300000	1763000000	1635700000	1795800000	3002200000	3088600000	2821600000	2961800000	3208400000	3172000000
YGR080W	1576900000	1831400000	1506200000	1712900000	1634600000	1716000000	1357600000	1468300000	1271300000	1698800000	1908500000	1764500000
YOR217W	1308200000	1475800000	1316900000	1548600000	1632800000	1230500000	1632700000	1827100000	1484500000	1453100000	1705500000	1472700000
YBR109C	1467400000	1849200000	1618500000	1104600000	1631400000	1756000000	1623800000	1356800000	1292400000	1365300000	1599300000	1358900000
YGL122C	1449400000	1769300000	1416900000	1655500000	1628400000	1212500000	1592100000	1811400000	1287700000	1301700000	1622800000	1220800000
YKR035W-A	1039700000	1226900000	1331300000	1229000000	1626600000	1444100000	1244500000	1274200000	1445800000	1217100000	1288100000	1053900000
YPL218W	2384500000	1363000000	2449300000	1933900000	1625100000	2808400000	1811700000	1497500000	2844200000	3015500000	1925800000	3076400000
YGR173W	1678100000	1395700000	1472700000	1796300000	1621800000	1509200000	2435700000	2248900000	2149100000	1793200000	1756500000	1676100000
YDR356W	1347300000	1485600000	1240700000	1435500000	1615300000	1171900000	1151200000	1190800000	868330000	988950000	1251200000	897580000
YDR310C	1226700000	1426400000	1164800000	1510200000	1611500000	1164900000	1310700000	1448400000	1019600000	1028000000	1452600000	1098500000
YER021W	2072500000	1697900000	2103300000	1856700000	1609300000	2432800000	2037000000	1757400000	2632200000	2346500000	1916800000	2345500000
YNL044W	1407000000	1193900000	1418700000	1581300000	1608200000	1453700000	1494800000	1600500000	1522300000	2341400000	2043800000	2160800000
YOR021C	1609400000	1758800000	1548400000	1705200000	1603800000	1573600000	1799500000	1823100000	1563500000	1394100000	1654000000	1287100000
YLR100W	1931300000	1988600000	1905200000	1636200000	1600000000	2123700000	5510200000	4934200000	6674300000	6151600000	5481200000	6374500000
YGL157W	863010000	800550000	751250000	1940100000	1597200000	1544900000	1362800000	1300000000	1173300000	2980400000	3193000000	3048900000
YHR049W	1178500000	1504200000	1272700000	1855500000	1596400000	1425600000	1502100000	1338800000	1106500000	1499500000	1318900000	1337700000
YKL033W-A	1254200000	1399300000	1116900000	1456100000	1594800000	1284000000	1452700000	1412600000	1034500000	951470000	1520100000	1044300000
YJL183W	1352600000	1160000000	1255900000	1941100000	1594800000	1368800000	1410300000	1338300000	1345300000	1170000000	1675100000	1120600000
YOL058W	2052600000	2200700000	1909400000	1658700000	1592700000	1587500000	956040000	1134500000	1431600000	834940000	758760000	1044900000
YPL210C	1845400000	1855300000	1908400000	1851600000	1591200000	2152600000	1733600000	1593600000	1863900000	1781900000	1691100000	2051100000
YBR117C	2362900000	2267200000	2429700000	1752800000	1590800000	1965900000	582360000	741410000	777290000	682930000	381270000	571630000
YBR080C	2041900000	1717100000	1996300000	1757800000	1588200000	1960600000	1664800000	1548400000	1865200000	2085500000	2004400000	2189800000
YBL036C	1209600000	1165000000	1117000000	1900000000	1587900000	1255000000	2416900000	2206100000	1410600000	1468100000	2071800000	1491300000
YGL228W	1632200000	1511300000	1643000000	1876600000	1586600000	1678600000	1587800000	1506100000	1392800000	1432200000	1740600000	1595700000
YMR124W	998610000	1248300000	1106200000	1370200000	1585300000	1106800000	947900000	1157300000	862320000	1075600000	1450900000	1081200000
YNL177C	1218000000	1333400000	1321700000	1451800000	1584500000	1298600000	694130000	747320000	580790000	743050000	698170000	773850000
YHR088W	1822600000	1895100000	2025700000	1566300000	1584200000	1412300000	2677300000	2823200000	2594200000	1675200000	1893900000	1890000000
YDL202W	1139600000	1254400000	1157800000	1595400000	1579400000	1439300000	800500000	829260000	713280000	684120000	838210000	755650000
YHR024C	1429900000	1530700000	1428900000	1508500000	1572300000	1736200000	841790000	852510000	1002700000	1191000000	1128800000	1347300000
YBR015C	1253600000	1389200000	1256600000	1481200000	1568700000	1222500000	1385400000	1505900000	1227400000	1306900000	1679500000	1397400000
YDL122W	1176800000	1200100000	1138600000	1494700000	1562800000	1212500000	1424400000	1396100000	1091600000	1060100000	1601600000	1126900000
YJL176C	1378200000	1638000000	1356000000	1524700000	1559900000	1226700000	1424600000	1427900000	1092700000	1103400000	1384400000	1106200000
YHR039C-A	461750000	894870000	775050000	1157000000	1559200000	1201300000	1066000000	1194200000	795740000	489160000	1263400000	556260000
YOL111C	857430000	1356600000	1023400000	1187700000	1557600000	980920000	1193600000	1249700000	836520000	884800000	1127600000	866620000
YLR043C	1818700000	2411600000	1783400000	1260600000	1551900000	1596500000	3054300000	2958800000	2446400000	2488200000	2468500000	2268400000
YOR122C	2485900000	3243400000	2317300000	1328400000	1548300000	2189400000	1319600000	1240000000	1398000000	2299300000	1291800000	2003300000
YPR180W	1417100000	1351600000	1972500000	1387500000	1543600000	1497500000	1359500000	1469300000	1355500000	1431500000	1561900000	1572200000
YDR239C	1748900000	2072200000	1756400000	1552900000	1541600000	1809500000	1573100000	1655800000	1590700000	1583200000	1423500000	1468200000
YPL058C	1381400000	1285400000	1363000000	1692500000	1540200000	1526200000	2434400000	2275500000	2300000000	1491600000	1520900000	1666900000
YOR016C	1017100000	724970000	816700000	1724100000	1538800000	1183000000	1236500000	1117300000	1253500000	1114800000	1327300000	1021200000
YGL244W	1383100000	1414200000	1348700000	1627600000	1534700000	1166300000	1551800000	1607500000	1285000000	1129400000	1493400000	1152700000
YML057W	1255600000	1324400000	1198200000	1601400000	1528600000	1558600000	1099500000	1130100000	1088500000	1595900000	1827100000	1793300000
YDR487C	2157900000	2768100000	2307500000	1040500000	1527600000	2694700000	1248300000	1433000000	2096300000	2703900000	1394300000	2920700000
YPL225W	1579700000	1490000000	1852800000	1523300000	1518700000	1969300000	1760200000	1788700000	2280100000	1971300000	1656000000	1926000000
YDR044W	2438800000	2286300000	2334800000	1439300000	1518200000	2076700000	1392500000	1498800000	2248700000	2549100000	1616200000	2588700000
YDR032C	1568500000	1223400000	1642600000	1699100000	1517200000	2259800000	1227100000	1058300000	1474200000	1976700000	1388300000	1744800000
YBL085W	1118600000	1396700000	1131100000	1473000000	1515500000	1122500000	1095600000	1296100000	884180000	987590000	1242400000	924480000
YML017W	1336800000	1643100000	1366400000	1438100000	1514800000	1198100000	1195200000	1347900000	1120100000	1158500000	1399500000	1150000000
YER114C	1280500000	1470200000	1189000000	1309500000	1513600000	1059800000	1352900000	1408100000	1040200000	979510000	1231300000	910190000
YNL244C	777490000	1133300000	649790000	1124600000	1507400000	618750000	1542000000	1350100000	491090000	659800000	1148300000	472900000
YNL004W	1283000000	1422100000	1112900000	1343000000	1500600000	1202700000	1029000000	1300700000	953630000	1089700000	1360200000	1029600000
YBR252W	3476200000	3925700000	3950400000	1240400000	1500200000	3352400000	1613400000	1626300000	3087900000	3065000000	1199800000	3109500000
YDL201W	1748400000	1628700000	1837000000	1782400000	1499600000	1679800000	2402400000	2432700000	2284900000	1741200000	1751900000	1888000000
YDL029W	1644500000	1445600000	1654500000	1470600000	1497000000	2038300000	1140500000	1150100000	1356400000	1842600000	1477900000	1706300000
YDR300C	1312100000	1447700000	1274800000	1264600000	1494600000	1123300000	1525500000	1650900000	1346100000	1209900000	1669800000	1307200000
YPL211W	1980900000	1729600000	1974000000	1580300000	1493200000	1774500000	2004900000	1831400000	2246700000	1740500000	1626000000	1910400000
YDR019C	1433100000	1423000000	1312300000	1469000000	1491800000	1687300000	772110000	738020000	741770000	785070000	642930000	709760000
YPR190C	1720000000	1613800000	1630700000	1547300000	1489600000	1506000000	1760200000	1632800000	1704400000	1526000000	1500600000	1515700000
YBL068W	1356800000	1507900000	1518900000	1404000000	1488000000	1332700000	1899400000	1947500000	1639200000	1453900000	1844700000	1551100000
YLR074C	1730000000	1768600000	1945000000	1110400000	1487800000	1669000000	3378400000	3448400000	3361800000	2302800000	1926600000	2732000000
YDR089W	1451100000	1319700000	1395100000	1525700000	1487300000	1165900000	1019100000	1099200000	1081500000	1090800000	1137600000	905230000
YER164W	1567400000	1667200000	1493900000	1600800000	1484200000	1445400000	1609300000	1518600000	1404300000	1228600000	1457500000	1220700000
YDR116C	1138400000	1333400000	1120400000	1344800000	1483500000	1311800000	586580000	736960000	512970000	906400000	864990000	808030000
YGR083C	1651500000	1599200000	1626300000	1497100000	1483000000	1601200000	1664000000	1735900000	1758000000	1543700000	1498500000	1530400000
YLR319C	1086300000	1315600000	1049800000	1527500000	1479500000	1058800000	2433000000	2624100000	1749700000	1766600000	2478800000	1686300000
YJL208C	1360500000	1301200000	1282900000	1476600000	1467900000	1546800000	1275800000	1151000000	1109900000	1162600000	1134300000	1040000000
YBR088C	1396100000	885480000	1211300000	2253300000	1465800000	1584600000	1770500000	1442900000	1701900000	1722400000	1951500000	1604100000
YDR324C	2058200000	1601800000	2242800000	1667200000	1457400000	2455300000	1921300000	1784600000	2957100000	2321400000	1766100000	2333000000
YDR153C	1683500000	1646700000	1568900000	1446800000	1455200000	1369500000	1751000000	1647400000	1731700000	1586100000	1472500000	1306000000
YNL284C	968480000	1312500000	1174500000	1273000000	1453700000	1203800000	577140000	626620000	567130000	700920000	885800000	720510000
YOR158W	1384600000	1523900000	1369900000	1304200000	1452000000	1511100000	627120000	676570000	647530000	770320000	821020000	832350000
YDR165W	1643700000	1318400000	1408500000	1716900000	1448100000	1226300000	2013500000	1953300000	1729100000	1371500000	1772400000	1412900000
YLR163C	1399600000	1417100000	1342500000	1407200000	1446700000	1388500000	1050700000	1136400000	1219100000	1217400000	1263000000	1231200000
YLR002C	1781200000	1692400000	1746300000	1563800000	1445700000	1381600000	3232400000	3495800000	3529900000	2477300000	2675400000	2467100000
YBR205W	1491700000	1536200000	1512300000	1439500000	1442600000	1733600000	1127300000	1149200000	1228700000	1344800000	1289400000	1332900000
YLR025W	1156800000	1275100000	1925000000	1187000000	1442400000	2024500000	2393200000	2758900000	3345900000	3247500000	2357000000	3580300000
YOR101W	1724800000	1807800000	1766600000	1407100000	1438600000	1318500000	1373800000	1613900000	1358100000	1117400000	1233400000	1226800000
YGL190C	1532400000	1657000000	1419900000	1614800000	1432100000	1769500000	1618600000	1631900000	1539800000	1626700000	1668300000	1769100000
YOR327C	1761800000	1873700000	1563900000	1165600000	1431900000	1596900000	1050300000	1335300000	1419400000	1382200000	1100900000	1548500000
YJR143C	1166300000	902140000	938500000	1626200000	1431700000	1180000000	1216700000	1169200000	1101200000	1059000000	1522400000	1303700000
YNL134C	963270000	850170000	929750000	1592700000	1431700000	1653700000	543090000	430140000	502360000	902150000	841660000	1059600000
YMR038C	1657500000	1854900000	1788400000	1374500000	1427300000	1577900000	1530100000	1578200000	1677500000	1452800000	1630400000	1679800000
YBR162C	888260000	1035200000	861200000	1489900000	1423900000	1367800000	932290000	980240000	870290000	1605600000	1936900000	1695700000
YBR073W	1417200000	1598300000	1372700000	1576700000	1419800000	1485500000	1219700000	1209600000	1179400000	1245300000	1439500000	1365500000
YOR171C	1396000000	1356500000	1402800000	1304300000	1415100000	1264900000	1399300000	1469700000	1366800000	1137500000	1441300000	1053300000
YJR109C	1138200000	957020000	1153800000	1803600000	1415100000	1577100000	1371800000	1341400000	1631500000	1769200000	1574500000	1694000000
YMR047C	1392700000	1786700000	1341600000	1370300000	1413800000	1162200000	1426900000	1573600000	1150300000	1253000000	1432900000	1194500000
YLR186W	1800100000	1363300000	1776000000	1634600000	1413500000	1891600000	2871500000	2960100000	3949900000	3231000000	2432900000	3015300000
YNL052W	852280000	1260800000	1192800000	1107700000	1411900000	1239200000	581320000	580970000	435060000	646270000	729990000	574010000
YDR304C	1918200000	3029300000	2921100000	1210700000	1408700000	1917100000	1445800000	1291000000	1891500000	2228000000	1055400000	1957100000
YIL149C	1000900000	984140000	892130000	1322000000	1403800000	922530000	1347900000	1465800000	1004300000	898200000	1382300000	889670000
YHR190W	1234100000	998960000	1294300000	1832000000	1400800000	1708800000	2163200000	1748600000	2143100000	1877800000	2128900000	2041600000
YMR305C	1395700000	1524300000	1290800000	1368600000	1400400000	1224200000	1386800000	1469500000	1234600000	2602200000	2518300000	2617500000
YLL041C	1078700000	1085100000	1058800000	1512400000	1399000000	1550900000	795710000	610610000	658220000	972180000	694600000	733510000
YGL012W	2150100000	1888200000	2223700000	1867600000	1398600000	2056500000	813510000	1070800000	1344800000	1234200000	1263900000	1578900000
YPR019W	1271700000	1197900000	1311200000	1375200000	1397200000	1322000000	1218200000	1199100000	1272800000	1195200000	1227200000	1102700000
YGL037C	958490000	844740000	954370000	1276100000	1395800000	1479100000	602270000	593570000	508000000	1520100000	1540200000	1530200000
YPL086C	1967400000	1585200000	1895300000	1474200000	1392800000	1695200000	2314700000	2263400000	2524800000	1878000000	1760500000	1894000000
YKL065C	812270000	836960000	707170000	1339800000	1392400000	993720000	837490000	931370000	743220000	1477900000	1928300000	1429100000
YLR399C	1401800000	1590700000	1323300000	1394700000	1385000000	1149900000	2147200000	1987800000	1442100000	1302000000	1796700000	1332700000
YBR222C	1056000000	986370000	1106800000	1319700000	1384100000	1202800000	1049500000	870080000	820620000	1402300000	1126200000	1095200000
YHL031C	1461700000	1499700000	1359200000	1558100000	1381200000	1536500000	1348900000	1352900000	1267600000	1227100000	1371800000	1389300000
YOL022C	1525100000	1814500000	1509200000	1505700000	1376900000	1434100000	1912000000	2145300000	1915500000	1553300000	1677100000	1693300000
YGR280C	2301800000	2871500000	2258700000	1228600000	1375200000	1829000000	2109100000	2273000000	2983300000	2162000000	1420800000	2201900000
YBL050W	1269400000	1295000000	1274200000	1341300000	1373800000	1186900000	1371100000	1480700000	1221600000	1442100000	1602200000	1403100000
YLR089C	1592300000	1715800000	1634900000	1460500000	1373600000	1478000000	2849000000	2910500000	2969800000	2710300000	3065400000	2775400000
YNR021W	1203900000	920700000	1301000000	1634200000	1373300000	1418800000	1172700000	996590000	1389100000	1266400000	1385800000	1398900000
YMR193W	1062600000	1226300000	1161700000	996850000	1371300000	1154400000	510720000	618750000	524570000	690930000	755890000	684190000
YKL068W	1196600000	1295500000	1097100000	1250700000	1370400000	1009300000	1222400000	1269800000	1049900000	924710000	1178600000	926960000
YLR003C	1513700000	1534900000	1359900000	1435100000	1364700000	1211400000	3618700000	3628700000	3182300000	2426700000	2487900000	2784800000
YGR097W	616680000	761350000	627060000	1440400000	1363900000	1370400000	1063800000	1139100000	1002800000	1422100000	1586000000	1479100000
YIR008C	1220800000	1380700000	1251700000	1388100000	1362500000	1322500000	1595200000	1461400000	1374300000	1317400000	1342600000	1282100000
YIL093C	1140900000	1240700000	1268000000	1271200000	1355400000	1228200000	705210000	668120000	617380000	771330000	783470000	791400000
YDL173W	1288600000	1632200000	1471300000	949260000	1351000000	1464900000	958870000	1006600000	1232700000	1289000000	984600000	1571800000
YDR028C	1185100000	1397800000	1237700000	1314700000	1350200000	1242000000	850190000	1045100000	908360000	990500000	1103300000	1056600000
YHR098C	1637400000	1199600000	1750400000	1476200000	1347300000	1827100000	1483200000	1288000000	1768600000	1979300000	1663100000	1918800000
YOR209C	2331400000	1647100000	2255400000	1605600000	1344400000	1898900000	1961600000	1746400000	2635000000	2325700000	1687900000	2473500000
YOL126C	1442400000	1305800000	1361500000	1424800000	1341800000	2157300000	1091400000	760580000	1253300000	2621700000	1595400000	2485600000
YEL015W	1501500000	1821400000	1507900000	1331200000	1341100000	1390600000	1248700000	1221900000	1294400000	1220800000	1198600000	1230100000
YAR007C	1625400000	1321700000	1705300000	1600800000	1337800000	1813200000	1368700000	1281800000	1715500000	1682600000	1508900000	1700900000
YLR420W	2125900000	2064200000	2194300000	1510700000	1336000000	1959700000	2708300000	2344100000	3193900000	3021600000	2263100000	3163800000
YGR271C-A	953360000	1236500000	1506200000	993630000	1333300000	1264000000	1879700000	2139000000	2029800000	1221300000	1368400000	1443000000
YHR047C	1701300000	1391500000	1932300000	1603100000	1331700000	2079600000	1444600000	1346400000	1875300000	2123100000	1732500000	2164500000
YKR071C	1340800000	1628700000	1335300000	1364900000	1328200000	1214000000	1618900000	1840600000	1594200000	1294400000	1484300000	1421500000
YOR108W	1480100000	1381400000	1465300000	1484700000	1325300000	1297300000	1742100000	1544000000	1897600000	1536900000	1601700000	1482100000
YML022W	1546600000	1137400000	1475000000	1540300000	1324900000	1447300000	1359500000	1100000000	1203900000	1289200000	1312300000	1230800000
YGR123C	1851600000	1639600000	1981400000	1380600000	1324400000	1792300000	1933200000	1759700000	2134300000	1576700000	1538000000	1809300000
YHR117W	1291100000	1122900000	1195400000	1490600000	1322000000	1340000000	982110000	983670000	1116300000	1072600000	1045100000	1074600000
YNL113W	2896000000	2712300000	3621000000	1082700000	1321200000	2967300000	1984600000	1686000000	3601400000	2874300000	1124800000	2866700000
YBR151W	1211300000	1365900000	1207500000	1412900000	1320200000	1364700000	1035900000	1084800000	1023100000	1239600000	1255100000	1196900000
YER004W	1051800000	1356900000	1118300000	1271400000	1316100000	1197200000	1020600000	1087500000	891700000	1011100000	1214700000	1012900000
YGR218W	1181100000	884310000	1338500000	1779200000	1315900000	1601500000	1532700000	1398400000	1960100000	1770800000	1734700000	1790000000
YDL204W	605430000	745450000	645600000	1201000000	1314800000	897360000	294240000	257370000	185250000	410240000	464900000	367410000
YLR172C	1263000000	1031300000	1196300000	1536500000	1313600000	1436400000	3393600000	2717300000	3295900000	2611200000	2712400000	2808600000
YPL137C	1050100000	1190000000	1028900000	1205900000	1313400000	1081200000	1001200000	1160400000	897110000	835990000	1002100000	891640000
YKL143W	1585800000	1898300000	1478300000	1205900000	1311900000	1111500000	1917700000	2019700000	1635800000	1290400000	1441300000	1340900000
YOR176W	1459100000	1562300000	1370600000	1556500000	1310700000	1344800000	1386500000	1180200000	1322100000	1713300000	1746100000	1957300000
YOL151W	892680000	773300000	884030000	1500000000	1309600000	1095600000	740450000	690510000	685590000	874470000	1221400000	1007800000
YAL053W	775380000	820230000	675310000	1313200000	1309500000	1213200000	878250000	960980000	715400000	1341700000	1618900000	1439900000
YKL073W	1092900000	1086900000	1125200000	1468200000	1309100000	1373400000	1023200000	960200000	971870000	1637200000	1755500000	1694000000
YJL128C	1240200000	1333900000	1278100000	1351100000	1305900000	1211200000	1195900000	1246600000	1110400000	1216600000	1359900000	1172400000
YGL150C	1433500000	1566600000	1356900000	1489400000	1305500000	1368100000	1477100000	1579900000	1470400000	1540900000	1549800000	1440900000
YIR037W	1066100000	1247600000	1317700000	1040900000	1304000000	1276900000	1188200000	1167000000	1238400000	1337900000	1387300000	1295900000
YDR083W	1547500000	1535700000	1534600000	1361700000	1292700000	1280200000	1509500000	1571800000	1670100000	1296400000	1272100000	1237500000
YBR130C	1071700000	1353000000	1158700000	1076800000	1291600000	1004000000	997090000	1212900000	958510000	855320000	1122100000	938620000
YBR146W	986470000	1175600000	1000800000	1207900000	1291400000	1132700000	587440000	569750000	520100000	641870000	686340000	596250000
YLR270W	1612000000	1339100000	1556600000	1277000000	1289900000	1506700000	2272200000	2064400000	2411200000	2964900000	2413000000	3372700000
YOL021C	1749100000	1489500000	1828800000	1549600000	1287600000	1787900000	1768000000	1616000000	2228500000	1894600000	1527800000	1888400000
YDR258C	942310000	958690000	921200000	1202900000	1286800000	1238000000	648440000	581350000	553130000	885890000	940910000	873960000
YER127W	1449400000	1567200000	1498200000	1093700000	1285200000	1257700000	1621200000	1909000000	1728200000	1397100000	1416900000	1380900000
YOL004W	1145200000	1224600000	1168000000	1279000000	1282900000	1111200000	1178800000	1115600000	1042500000	962470000	1153300000	907230000
YMR158W	774380000	1200100000	960890000	1032200000	1278400000	1072700000	606350000	589070000	507880000	530350000	674660000	537930000
YDR328C	1777100000	1834400000	1772400000	1156200000	1277200000	1575600000	966220000	1053000000	1309700000	1636900000	1054600000	1579800000
YMR220W	1733900000	1464700000	1692200000	1342600000	1276000000	1356400000	1832700000	1907300000	2084200000	1892900000	1803000000	1694200000
YMR027W	1526900000	1375000000	1478900000	1336800000	1275300000	1398900000	1048500000	1007000000	1047400000	1267000000	1140000000	1275900000
YIL063C	1205500000	1492300000	1227300000	942310000	1268000000	1118800000	972650000	1093200000	1172700000	1036600000	1025200000	1138900000
YOR048C	1787700000	1578100000	1792300000	1380000000	1267900000	1612800000	1579500000	1562300000	1698900000	1588200000	1480900000	1736400000
YDR189W	1121100000	1098800000	1291600000	1382300000	1262800000	1240600000	1193500000	1162100000	1226300000	1160200000	1339800000	1185200000
YKL126W	1242500000	1140300000	1306300000	1365900000	1260600000	1551200000	968110000	909080000	1036700000	1397500000	1307800000	1328800000
YGL191W	315880000	444110000	457600000	1013800000	1253700000	474460000	483100000	414100000	188680000	214480000	643760000	154890000
YDR292C	1401200000	1500000000	1386000000	1351200000	1253600000	1193300000	1184200000	1143300000	1206400000	1134600000	1178300000	1210900000
YPL266W	1583400000	1440100000	1588000000	1396700000	1252600000	1604300000	1627600000	1704200000	2048500000	1514900000	1538900000	1473500000
YLR222C	1612200000	1248900000	1594500000	1562100000	1251000000	1871100000	3463400000	3142100000	4747500000	3525100000	2923200000	3754100000
YMR029C	965900000	1124000000	1077300000	1149100000	1246700000	934410000	776840000	819810000	748420000	912380000	1008000000	973620000
YKR025W	1494500000	1692900000	1608700000	1018900000	1243200000	1227100000	1414500000	1536400000	1673000000	1432200000	1208500000	1319800000
YIL137C	1213600000	1022900000	1371300000	1460800000	1239300000	1301200000	1367300000	1285800000	1519900000	1462300000	1507200000	1349700000
YFL008W	908530000	953690000	899940000	1159100000	1238200000	830760000	1025200000	978540000	736830000	790930000	988680000	705720000
YKR072C	1169700000	1315700000	1093400000	1085200000	1236600000	1000400000	1110600000	1212400000	1058600000	1048500000	1179300000	1033000000
YNL250W	1152300000	1141900000	1184600000	1235000000	1236400000	1121800000	1409000000	1466200000	1365100000	1309600000	1577200000	1323600000
YNL123W	1774000000	1375400000	1868400000	1419000000	1235200000	1864100000	1758700000	1623500000	2269100000	1949800000	1578900000	2100800000
YKR081C	1574000000	1688400000	1630900000	1342300000	1234200000	1351800000	1892100000	1887000000	2055300000	1384900000	1276100000	1554800000
YGL200C	1036000000	986190000	1053500000	1386600000	1230700000	1178700000	916610000	935660000	932220000	1172900000	1398800000	1036500000
YOL060C	1171600000	1229600000	1081600000	1210300000	1227100000	1098500000	950010000	1014700000	893800000	1085900000	1029200000	1060000000
YDR135C	1008900000	866440000	1039300000	1326400000	1226600000	1308600000	890780000	904130000	957790000	1195500000	1204200000	1253900000
YOR004W	1445500000	1726200000	1378500000	1196800000	1225300000	1217400000	1588100000	1600400000	1559800000	1060500000	994100000	1217400000
YHR169W	1134500000	1300300000	1225100000	1164400000	1221600000	1072100000	1636700000	1580500000	1647300000	1193600000	1382000000	1398600000
YBR198C	1269500000	1412600000	1452800000	1319500000	1218200000	1356700000	1236400000	1293200000	1373500000	1337600000	1303300000	1370300000
YOR109W	1253400000	1292800000	1311600000	1338900000	1217000000	1223100000	1137400000	1098200000	1114300000	1133600000	1222300000	1153700000
YLR357W	1018100000	1210700000	1008500000	1208300000	1215100000	887010000	1730300000	1863300000	1252500000	1182200000	1582700000	1156000000
YGR157W	776570000	707280000	696710000	1313200000	1213100000	1190100000	391080000	339620000	389020000	484920000	622110000	586440000
YGL111W	1389600000	1162800000	1272100000	1469000000	1208500000	1374200000	1771300000	1587800000	1827800000	1486900000	1497700000	1475200000
YDR289C	939140000	1181900000	988570000	1079000000	1207300000	831710000	1352800000	1407700000	1135800000	1046300000	1443300000	1119300000
YNR006W	838070000	979670000	796650000	1217100000	1207100000	936600000	1085600000	1121900000	956030000	1121100000	1401200000	1105500000
YBL061C	844760000	945070000	872660000	1238800000	1201700000	987390000	924920000	1027800000	902400000	1095700000	1199600000	1089600000
YNR018W	1086700000	1197400000	1166400000	1072400000	1195300000	1065600000	858490000	830620000	937560000	846000000	807090000	922380000
YNL168C	1273700000	1109400000	1265200000	1302000000	1194100000	1384400000	971290000	919790000	1015800000	1051200000	1156700000	1034200000
YMR005W	1126700000	1353600000	1144000000	1040100000	1192600000	986610000	983210000	1144500000	983450000	917870000	993880000	936610000
YDL213C	2508200000	2846400000	2408700000	1119200000	1190200000	2218100000	1345000000	1374300000	2372800000	2393600000	984550000	2368600000
YLR387C	1249900000	1379400000	1185000000	1076400000	1188000000	998270000	2425100000	2728000000	2448600000	2340900000	2648800000	2341600000
YJL122W	1066400000	1237600000	998160000	975580000	1185700000	1089300000	1493800000	1520400000	1165100000	971840000	1067100000	876310000
YML004C	1374400000	1236500000	1547100000	1330100000	1185100000	1552200000	954280000	868570000	1243600000	1548300000	1177600000	1381600000
YDL097C	1294900000	1036800000	1347700000	1517200000	1185000000	1500300000	1320400000	1310200000	1465000000	1552000000	1578000000	1611800000
YJR059W	1048300000	1111300000	966110000	1243600000	1182900000	1054500000	863340000	966640000	720520000	839850000	1085500000	839590000
YOR157C	1222000000	1191200000	1386300000	1313900000	1182700000	1501600000	1145500000	1190400000	1287900000	1325500000	1342200000	1394000000
YDL132W	1054600000	1086500000	1126400000	1369100000	1181900000	1190000000	1454800000	1300700000	1372300000	1403400000	1548200000	1440900000
YGL106W	696910000	1034800000	751830000	792100000	1180600000	892770000	985560000	1024500000	563070000	653520000	926310000	668310000
YGR001C	977030000	909730000	929970000	1248200000	1172800000	825310000	1516700000	1418600000	1028300000	1064700000	1238600000	952990000
YOR356W	1488800000	1759000000	1458300000	1213100000	1172300000	1324600000	1115600000	1117200000	1221400000	1150400000	1077300000	1177400000
YLR219W	850540000	1069000000	824210000	1059400000	1171400000	843120000	1285500000	1418700000	1116500000	1290100000	1665600000	1282300000
YJR148W	2179700000	2047200000	2084000000	1311500000	1170400000	1467600000	1024700000	980440000	1032500000	1111700000	953110000	1089700000
YGR005C	1149700000	1270000000	1043600000	1018600000	1170200000	853700000	1103700000	1221900000	964280000	989740000	1256900000	963870000
YPL228W	1246200000	1282400000	1151600000	1262600000	1165100000	1036200000	1463300000	1383800000	1218000000	1062000000	1205800000	1079900000
YOL052C	1108300000	1082000000	1188100000	1250900000	1164400000	1107500000	1357000000	1247800000	1313800000	1029100000	1343200000	1048400000
YKL192C	820830000	1024100000	555170000	786890000	1162300000	805150000	687420000	568060000	371320000	696660000	927170000	579640000
YGR078C	782500000	1036000000	841530000	1151300000	1162000000	727670000	1035400000	1051300000	781150000	712530000	993810000	717690000
YAL019W	1206000000	1298000000	1229800000	1192500000	1157800000	1075300000	1199200000	1412800000	1223200000	1061800000	1253900000	1045000000
YGL001C	1633700000	1554100000	1694800000	1267200000	1156300000	1526000000	2241000000	2172300000	2774400000	2334000000	2124800000	2520400000
YNL075W	1702600000	1780700000	1855800000	1156800000	1156100000	1508600000	1983100000	1889800000	2485100000	1677400000	1299500000	1724700000
YER009W	888500000	1123700000	1028700000	750130000	1155700000	981090000	1069300000	1110200000	828900000	796660000	770610000	749310000
YLL013C	960290000	951060000	853270000	1125700000	1155100000	968900000	1039200000	1144600000	960180000	975110000	1075100000	907930000
YER067W	914780000	805460000	730440000	1029100000	1153400000	1863100000	1271900000	891120000	1510100000	1368400000	780960000	1436200000
YFR002W	1414800000	1249400000	1439500000	1368400000	1151400000	1607500000	1401900000	1243400000	1584600000	1557400000	1340600000	1645700000
YJR035W	834930000	907730000	722420000	777860000	1149500000	347660000	814430000	1305200000	392590000	1532600000	1431200000	331610000
YLR389C	1232200000	1011300000	1235600000	1335800000	1148100000	1404900000	2183400000	2170900000	2379800000	2141200000	2173500000	2135800000
YDR326C	1079200000	1332600000	1179900000	1269200000	1147600000	1067000000	1056700000	1154200000	911020000	944200000	943870000	880350000
YKR062W	1003600000	1302900000	1042300000	1028500000	1147000000	906900000	1050000000	1163100000	932570000	893180000	1100600000	940550000
YPR127W	1139500000	992640000	1149100000	1259800000	1139700000	1336900000	1005200000	611900000	556490000	1078000000	706210000	924150000
YOR001W	1279300000	1275300000	1228200000	1101200000	1139300000	1008600000	1348500000	1393900000	1351700000	1095200000	1178600000	1130000000
YJL172W	853230000	781270000	844870000	1174100000	1139000000	1094100000	709330000	694210000	641170000	844620000	1135900000	1022300000
YOR354C	1243000000	1198600000	1252800000	1321000000	1138300000	1438200000	640800000	641880000	685400000	930580000	793670000	860350000
YNL084C	878300000	961200000	843120000	1198100000	1138300000	978870000	1212700000	1175000000	996200000	946680000	1256800000	998440000
YLR398C	1217700000	1208100000	1236900000	1200700000	1137300000	1277800000	2196100000	2199900000	2314100000	1980700000	2017100000	2119300000
YGL068W	487840000	720970000	635220000	914120000	1132700000	972220000	534100000	508250000	544500000	489770000	527400000	392840000
YOR061W	896520000	642720000	891610000	1353300000	1132100000	980200000	1393300000	1153400000	1245700000	1133400000	1500800000	1182000000
YCR002C	1055300000	734810000	1114100000	1305000000	1131000000	1326200000	1108500000	991890000	1160000000	1209400000	1219500000	1287900000
YHR039C	924220000	687970000	901310000	1330600000	1130900000	1033200000	1747700000	1530400000	1617900000	1715000000	1991300000	1686300000
YFR050C	1244200000	1098700000	1285700000	1082200000	1129200000	1586300000	1116700000	1064900000	1350700000	1465300000	1199100000	1569100000
YPL084W	899880000	1008100000	884700000	1145400000	1128800000	951770000	974550000	1030700000	841620000	884510000	1086200000	905590000
YIR026C	1082200000	1071700000	1063300000	1224600000	1128700000	1000500000	1413200000	1519500000	1444700000	1192700000	1276300000	1193900000
YOR267C	790430000	976080000	811700000	1079300000	1124700000	1032100000	891310000	957720000	813810000	991290000	997990000	927210000
YNL313C	1338000000	1147700000	1442300000	1314700000	1123800000	1548700000	1507400000	1429800000	2002200000	1579600000	1384400000	1629700000
YHR023W	946140000	968940000	863250000	1188000000	1122900000	961450000	1002100000	1048600000	917560000	877100000	1073100000	958910000
YPL009C	1121800000	1078600000	1196300000	1172500000	1117400000	1056000000	1275600000	1366600000	1325800000	1112100000	1309400000	1199600000
YNL182C	1267800000	1156500000	1320500000	1291900000	1116300000	1315600000	1718800000	1685600000	2018300000	1491400000	1334600000	1409000000
YIL021W	1051600000	1227800000	1043500000	1263200000	1115800000	1127800000	1244800000	1274000000	1066300000	1082400000	1298300000	1142900000
YHR070W	1206900000	1226500000	1164700000	1320400000	1114400000	1127300000	1430000000	1382100000	1454900000	1196000000	1245500000	1219400000
YBR251W	862690000	1084700000	820310000	1000600000	1113400000	925050000	590310000	575520000	482590000	589240000	622930000	599180000
YLR300W	1915500000	1657000000	2239100000	1216000000	1111400000	2608600000	1174700000	1059900000	2292700000	2972600000	1417700000	3411600000
YBL033C	1123900000	1280700000	1135300000	1095500000	1108900000	997940000	1106800000	1089600000	1036900000	940930000	1108400000	1022700000
YJL140W	1003400000	983540000	1267600000	972150000	1108900000	1187600000	1054400000	1192700000	1107100000	1128200000	978810000	946870000
YER107C	1552500000	1581800000	1303300000	1193200000	1108700000	1401500000	1243900000	1056700000	1410700000	1299000000	1145200000	1381700000
YNL207W	1505300000	1345800000	1506200000	1187600000	1107400000	1386600000	1592700000	1560900000	1836200000	1415900000	1242000000	1480000000
YNL085W	1279200000	1034100000	1359400000	1304300000	1103700000	1699500000	1174700000	950290000	1445900000	1482500000	1240600000	1557600000
YDL004W	1260600000	1449800000	1124100000	850870000	1101800000	1540800000	559710000	496350000	543180000	1101500000	418550000	841920000
YHR196W	1280400000	938000000	1232200000	1238700000	1101300000	1232000000	1591100000	1516600000	1886100000	1440800000	1495800000	1534700000
YDL205C	1081800000	1078900000	1026100000	1304300000	1100600000	1015700000	962940000	997860000	908440000	1032500000	1117600000	875280000
YPL141C	917750000	1102800000	971350000	1161400000	1098400000	1057100000	1216000000	1229700000	1095300000	1033400000	1030500000	1163800000
YER017C	886750000	1017900000	802340000	1043800000	1097500000	1060200000	720090000	650890000	596400000	801450000	828780000	751220000
YER012W	858750000	832250000	883580000	1086600000	1094900000	888250000	1165600000	1067900000	1077000000	970480000	1301500000	1030300000
YLR418C	1447100000	1357700000	1581400000	1156600000	1094700000	1364800000	2546700000	2853800000	2953000000	2497000000	2246900000	2634600000
YLR018C	984050000	1121600000	1017500000	1067900000	1093600000	794760000	2010300000	2230000000	1745300000	1367100000	1612100000	1379500000
YPR125W	1382700000	1307400000	1481400000	1065400000	1092300000	1556700000	1019700000	1004400000	1331400000	1270100000	1031600000	1347000000
YOR207C	1345000000	1150300000	1387600000	1241700000	1090200000	1452100000	1606200000	1380500000	1797400000	1556500000	1387000000	1491900000
YIR003W	1078000000	1290600000	1110100000	1048000000	1087800000	1034300000	833470000	879960000	849170000	883500000	1032300000	917780000
YKR003W	868250000	1061500000	841450000	1052400000	1087700000	1035300000	844660000	894310000	777730000	1094700000	1175500000	1107000000
YNL251C	1334300000	1345700000	1290500000	1038500000	1087300000	1090200000	1178000000	1244400000	1271600000	985630000	1082100000	995440000
YBR059C	935610000	1178200000	959370000	943070000	1084100000	958770000	782280000	817500000	742710000	897800000	964040000	912880000
YLR250W	730760000	852330000	976030000	948150000	1081200000	1066700000	909370000	1064500000	885150000	1139100000	1436200000	1313300000
YKR085C	860620000	913690000	1042900000	868570000	1079100000	1102800000	486640000	502100000	496070000	616740000	600240000	600380000
YOR131C	1009400000	1176200000	1281500000	1033600000	1077900000	1111200000	955560000	977970000	1007000000	1085500000	978180000	1103600000
YLR337C	905980000	1036800000	783300000	987420000	1076500000	824610000	1097700000	1221700000	943530000	1027100000	1326600000	1072100000
YMR302C	764750000	755600000	749250000	1022600000	1072600000	884330000	592280000	614630000	513240000	607020000	717850000	547310000
YMR272C	861410000	873620000	846180000	1060600000	1071600000	832090000	1275700000	1231800000	1093700000	1008000000	1474100000	1169400000
YOR069W	871110000	919240000	806360000	1030200000	1070700000	858820000	1048000000	1039200000	834420000	1101600000	1254100000	1089400000
YLR209C	1017500000	955050000	1032200000	1161500000	1068600000	1088000000	2079600000	1906900000	2078900000	2052300000	2067500000	1714200000
YNL232W	1093700000	1233700000	1006600000	970510000	1068000000	821560000	1532300000	1447600000	1280300000	1117200000	1290300000	1059600000
YIL091C	1261300000	1326800000	1195700000	1164100000	1065100000	1200300000	1568300000	1377500000	1712700000	1299000000	1285500000	1376200000
YHL013C	1110900000	1330200000	1150800000	1030200000	1064800000	933700000	1309600000	1371700000	1226800000	1093900000	1198300000	1045600000
YOL144W	980900000	1174500000	956210000	1029300000	1064400000	888530000	1378800000	1511200000	1023800000	917880000	1058300000	1025900000
YCR051W	1163900000	1352900000	1599900000	902690000	1062900000	1198600000	1295600000	1350600000	1441900000	1085600000	1032800000	1140300000
YLR419W	1160800000	1105600000	1123600000	1142300000	1059400000	990400000	2385100000	2286700000	2405400000	1987200000	2170500000	1946000000
YDL065C	995570000	1322400000	1095300000	895120000	1058300000	1027600000	960240000	1030800000	1054100000	1068700000	1120500000	1129300000
YDR055W	833290000	1050100000	828980000	1131700000	1057300000	909870000	510450000	617240000	547060000	983990000	1146900000	1080000000
YAL016W	941300000	748200000	851710000	1278700000	1055000000	1058900000	1024500000	933250000	975510000	1113700000	1208400000	1140400000
YER001W	738120000	763950000	718360000	1152000000	1054600000	924470000	535000000	520160000	501990000	560200000	670150000	557780000
YER103W	1584400000	1273500000	1245100000	1136900000	1051700000	939760000	647170000	319130000	265950000	527360000	413250000	516350000
YBR279W	1315400000	1393500000	1142800000	976110000	1050200000	1123600000	1093100000	1229300000	1143100000	1067600000	1049600000	1091600000
YIL135C	878600000	941810000	867910000	911090000	1049600000	952010000	571850000	707480000	673210000	763580000	780440000	734870000
YOR281C	1298700000	1055500000	1157900000	1167600000	1048700000	1154700000	1229200000	1372700000	1305000000	1296200000	1150600000	1333000000
YGR187C	1255000000	1066900000	1275100000	1137800000	1042400000	1230700000	1526000000	1489800000	1789800000	1463200000	1311700000	1419800000
YDR481C	1157900000	805640000	1216000000	1267700000	1042400000	1273200000	690170000	643290000	783390000	890740000	795660000	891510000
YNR013C	572890000	605670000	484240000	967440000	1041200000	609020000	1292200000	1261300000	788260000	756570000	1411700000	746210000
YJL125C	1177800000	1155700000	1163000000	1121500000	1039700000	1329300000	1115700000	1208700000	1534700000	1320900000	1238900000	1302300000
YJR060W	1235500000	1342400000	1270700000	926680000	1039500000	1206700000	999310000	1025400000	1187700000	1095700000	875760000	1073400000
YLR369W	941550000	927770000	878200000	982130000	1037400000	810110000	1634200000	1595900000	1463800000	1581700000	1781000000	1585000000
YKR024C	1240100000	1209500000	1243700000	1111200000	1036200000	1039500000	1795800000	1701400000	1768300000	1226400000	1215400000	1284800000
YAL044C	1622400000	1582000000	1581100000	862720000	1034600000	1546700000	732610000	550230000	826030000	1159400000	623110000	1064500000
YBL079W	1164000000	1174500000	1190800000	1140600000	1032100000	1166000000	1109200000	1064100000	1086100000	997040000	1046800000	1100200000
YHR114W	937300000	1012700000	933320000	905810000	1031700000	772260000	960140000	1092700000	935760000	872310000	1067300000	906670000
YHR063C	1301400000	1218000000	1311700000	1185300000	1031500000	1303500000	958210000	919820000	1214000000	1334200000	1105100000	1259400000
YDL161W	1099400000	1202900000	962880000	1078100000	1031000000	1034300000	967270000	1047700000	958380000	1060600000	1087200000	1059700000
YDR182W	1127200000	1125800000	1280200000	917790000	1030000000	1043100000	654760000	709440000	890820000	944510000	743660000	779580000
YMR188C	636570000	798840000	695610000	851310000	1029200000	763170000	425430000	486340000	376680000	437280000	542640000	469450000
YMR208W	1196200000	1140300000	1250800000	1273700000	1027100000	1303700000	1619900000	1491500000	1702600000	1672300000	1780300000	1741900000
YNL197C	889240000	951730000	956550000	935770000	1025100000	856280000	782720000	846870000	831590000	770600000	743380000	754160000
YNL290W	1124900000	878870000	1106100000	1122900000	1023900000	1080100000	1061400000	1059200000	1198100000	1151000000	1098400000	993650000
YLL052C	1004800000	820710000	860690000	1247500000	1023700000	938490000	3722200000	3931600000	3697500000	2647200000	2997400000	2677800000
YFR001W	2234100000	1874500000	2375900000	763480000	1023000000	2038000000	1272000000	1277200000	2526900000	2048000000	882020000	2111800000
YOR294W	1550300000	1391800000	1899300000	852090000	1023000000	1675600000	1487200000	1439000000	2161400000	1378200000	859700000	1815300000
YCR087C-A	2361400000	2006500000	2859700000	755010000	1020900000	2373000000	1631000000	1439100000	3413900000	2466700000	877590000	2565700000
YER083C	857610000	919200000	952550000	945530000	1020500000	800460000	1143200000	1222400000	975610000	906290000	1057100000	949610000
YHR009C	917560000	1012200000	873510000	1059400000	1019800000	864000000	778040000	738410000	730250000	783450000	849920000	829720000
YNL281W	1390900000	2015600000	1755300000	848480000	1019400000	1206600000	1142600000	1165000000	1203100000	1255100000	968760000	1423400000
YHR069C	1158200000	1064700000	1161300000	1052900000	1018500000	1045200000	1349300000	1326700000	1450300000	1193000000	1253900000	1180900000
YOR253W	857150000	971770000	1107800000	897170000	1017700000	854400000	1069100000	1117800000	1074300000	798870000	837360000	714300000
YLR351C	1254100000	1384200000	1384400000	1004100000	1016200000	1127600000	1768200000	1759600000	1918500000	1989500000	1865200000	2093500000
YPL207W	1121800000	1027200000	1172800000	1094500000	1015900000	1079800000	928870000	992210000	1063100000	858530000	954510000	932040000
YPR133W-A	337720000	607040000	305920000	1206500000	1014600000	330040000	686080000	787210000	122900000	169470000	680870000	200050000
YPL101W	1046300000	1389800000	1046100000	962870000	1012000000	859330000	1127800000	1237100000	1079100000	1004100000	1116600000	999130000
YDL064W	708640000	918840000	989880000	745200000	1011800000	772010000	806470000	920030000	724890000	589540000	674720000	509740000
YPL204W	1158700000	1113500000	1126400000	954930000	1011100000	948280000	1033100000	1051600000	1145700000	1003200000	1047200000	1014600000
YJL063C	603120000	759650000	632270000	995000000	1008300000	772440000	537740000	563360000	335980000	420100000	628560000	432400000
YCR072C	1247100000	1291100000	1411200000	996120000	1006400000	1082300000	1607300000	1609900000	2034100000	1405700000	1200700000	1432300000
YLR179C	1163700000	948560000	1036100000	1013800000	1003900000	1087400000	2077000000	1599000000	1729700000	1896600000	1444200000	1756100000
YMR173W	1314400000	1266200000	1219500000	817050000	1003500000	1114400000	294380000	306010000	385110000	1617100000	1098700000	1520000000
YNL309W	903160000	1199600000	916140000	910820000	1002500000	869640000	821500000	1013800000	789360000	640230000	793840000	650680000
YMR080C	1350100000	1153300000	1173400000	1105800000	1001800000	1104100000	1271200000	1214400000	1333800000	1127400000	1112200000	1120500000
YMR092C	1074400000	1025800000	1023900000	1143300000	1001500000	1337000000	985010000	938830000	1163600000	1347300000	1190300000	1399500000
YNL110C	2134200000	2289500000	2047400000	858400000	1001400000	1506000000	1506700000	1454000000	2109800000	1534300000	821270000	1667400000
YBR154C	960100000	1177100000	942250000	1192300000	999300000	951600000	1522000000	1376100000	1322900000	938030000	1354100000	1205100000
YAL032C	901910000	1224100000	1059400000	883150000	998670000	940880000	892250000	1190600000	877410000	804180000	923050000	967330000
YPR189W	1454400000	995520000	1406400000	1167100000	998510000	1432300000	1548900000	1292800000	1843500000	1621000000	1328200000	1581500000
YPL112C	1152100000	934930000	1301400000	1115700000	997930000	1017500000	1132500000	1183900000	1171200000	1138900000	1269600000	1235100000
YNL307C	1144400000	881420000	1345400000	1106300000	997400000	1704400000	865200000	739280000	1191400000	1259000000	1129100000	1335800000
YML007W	841440000	1045200000	811700000	933490000	997160000	817940000	785880000	991570000	732100000	768360000	908800000	790780000
YIL034C	1216300000	1048400000	1152800000	1152500000	996320000	1258800000	956220000	874390000	1164600000	1506700000	1210200000	1445400000
YMR009W	782510000	861980000	670220000	847120000	994580000	788090000	595610000	556040000	394100000	473850000	518560000	505720000
YJR117W	795750000	539660000	812310000	1060000000	993500000	823430000	830750000	843160000	862440000	900650000	1000900000	908040000
YOR224C	1152100000	1265700000	903220000	897470000	993120000	1023200000	1056300000	948740000	890930000	884330000	928380000	952330000
YHR097C	951290000	1056100000	987830000	879260000	991990000	1063400000	579500000	638090000	590620000	1309800000	1326700000	1403400000
YDR347W	915480000	806740000	824540000	1088400000	989800000	996210000	546830000	474430000	491920000	599540000	632200000	622000000
YLR262C-A	493920000	536180000	1196300000	498430000	989570000	1879800000	1281500000	1137500000	1586900000	1329800000	1050100000	1541500000
YOL070C	932790000	1001100000	854330000	997990000	989510000	876090000	862180000	974550000	750170000	754000000	875720000	700660000
YJL136C	1474400000	968190000	1112600000	702170000	989010000	1049800000	995300000	511890000	1114200000	1007000000	910330000	1769400000
YNR035C	1320000000	1205100000	1583400000	1338800000	985730000	1676200000	1069600000	986240000	1578100000	1636600000	1320300000	1932200000
YJL010C	1086100000	949860000	1021300000	1102800000	981750000	1021600000	1561400000	1503100000	1502000000	1191400000	1198100000	1337800000
YNR054C	999320000	1132800000	1086900000	779780000	981720000	919320000	869690000	977080000	996840000	906370000	739710000	891820000
YFR011C	568580000	792750000	668060000	686380000	981540000	844410000	419740000	428610000	348840000	423980000	490320000	391790000
YHR121W	1001700000	1085600000	865080000	939670000	980380000	990200000	768550000	807250000	724250000	781190000	673010000	772140000
YLR129W	1210100000	983620000	1236700000	1275700000	980310000	1318800000	2947200000	2489700000	3657900000	2375700000	2603000000	2651300000
YJL069C	1450600000	1379400000	1497300000	1143800000	979880000	1248600000	1537000000	1516800000	1695700000	1446300000	1143700000	1440700000
YEL050C	719780000	885520000	723000000	970080000	977060000	750780000	401800000	447200000	367770000	463570000	559210000	447960000
YLR096W	1007300000	1086900000	1022400000	926520000	973300000	873750000	1781300000	2091600000	1724800000	1549900000	1616600000	1450300000
YDR337W	599210000	1085800000	757320000	835540000	972030000	895990000	399250000	403660000	396480000	511330000	557310000	499200000
YLR292C	720820000	714250000	797690000	952350000	971430000	886420000	1061900000	1063500000	953970000	1020300000	1162900000	1029200000
YMR296C	1062800000	863030000	1166600000	1073600000	968130000	1300700000	1011400000	945230000	1367500000	1353000000	1088400000	1311700000
YKL122C	2606000000	3002800000	2633800000	1031500000	963860000	2131400000	1441200000	1271900000	2237400000	2319700000	741720000	2033500000
YMR311C	1165200000	1053900000	1564700000	650650000	963370000	1427700000	742430000	743100000	1227500000	1547100000	700320000	1518300000
YOL006C	595010000	615230000	547650000	899260000	961690000	582770000	1014500000	1016900000	678680000	648250000	866280000	717920000
YEL032W	1109700000	1132900000	1184400000	1000900000	956120000	1125700000	1092600000	1041900000	1171700000	991190000	1033700000	1014600000
YGR208W	1193700000	986290000	1034800000	976180000	952680000	948090000	1339700000	1242000000	1089300000	1032100000	1069400000	871400000
YJR113C	581360000	788440000	642690000	811770000	952300000	739780000	380110000	373390000	308620000	389260000	481280000	394010000
YPR097W	842680000	1030600000	932010000	1013100000	947170000	1024000000	996150000	965550000	977930000	942410000	1028400000	959980000
YKL190W	653940000	726540000	711850000	829100000	945260000	684860000	783640000	764310000	641380000	733400000	816930000	507380000
YLR078C	803450000	916100000	868670000	862200000	942650000	727410000	1325200000	1564400000	1210500000	1434000000	1554400000	1505100000
YDR457W	1288300000	1064800000	1506600000	1063500000	941220000	1500900000	957910000	945230000	1507200000	1318900000	1084100000	1291500000
YOR197W	1043800000	1215600000	1023700000	891950000	940440000	965940000	824420000	971420000	1031200000	1049400000	910890000	918410000
YBR003W	771510000	782310000	821220000	1096100000	936350000	1025900000	496420000	449820000	520560000	710130000	729200000	705430000
YMR128W	1025100000	970110000	1053500000	1104100000	936160000	1158000000	1387100000	1260500000	1427500000	1146600000	1144600000	1126400000
YNL108C	1108900000	1111200000	1147000000	1060900000	935250000	1063900000	1019200000	1117800000	981520000	963230000	966990000	978870000
YJL054W	879930000	936220000	892000000	961150000	933700000	865310000	661480000	762650000	649310000	717120000	821830000	687300000
YDR001C	971830000	763460000	902300000	966250000	932330000	1452300000	733920000	656190000	867620000	1502000000	1093800000	1572000000
YIL010W	958420000	1188000000	1114700000	805860000	930620000	995560000	647460000	686100000	702150000	1063900000	834030000	1113000000
YDR345C	1337200000	1271900000	1288900000	953260000	929470000	893120000	1798200000	2033600000	1785500000	1350800000	1525400000	1403700000
YOR252W	945230000	1158500000	1417400000	711200000	929030000	1246700000	1299500000	1248400000	1532800000	981010000	789530000	1369100000
YMR067C	797080000	997860000	810540000	947600000	928510000	829580000	1157300000	1244800000	1019000000	1022300000	1293700000	1037100000
YMR308C	923020000	767560000	1081700000	1042500000	927520000	1185900000	1226800000	1142000000	1585400000	1297900000	1237900000	1335600000
YHR030C	563220000	561140000	543660000	1084800000	927120000	1218400000	525480000	596720000	611810000	1529900000	1483300000	1610000000
YPL169C	882230000	918810000	1009300000	1246300000	925140000	1192000000	1389400000	1264500000	1350000000	1215100000	1345700000	1328700000
YLR268W	743960000	824620000	779600000	963810000	924960000	815640000	1333000000	1461300000	991450000	1154300000	1510300000	1237300000
YER068W	925560000	1144200000	923070000	838300000	924270000	899590000	912830000	988280000	936330000	898940000	933640000	970790000
YLR026C	624900000	798570000	689330000	857730000	922690000	600490000	1441700000	1444300000	933570000	935300000	1504000000	970380000
YDR062W	1185200000	1132300000	1274300000	1119700000	920020000	1315700000	963420000	962580000	1185500000	1259700000	1066300000	1217500000
YFR034C	828710000	883070000	857580000	733740000	919690000	665030000	820600000	960760000	696870000	590770000	736770000	582030000
YPR118W	1255800000	1074200000	1265200000	1141600000	916760000	1146100000	1210700000	1058600000	1325500000	1271900000	1198400000	1204400000
YER081W	878050000	724840000	841920000	1072000000	916170000	1079200000	799810000	912920000	1063500000	1323400000	1213100000	1342700000
YPL215W	981120000	920540000	1042300000	831270000	915210000	1371400000	383370000	426820000	539870000	722270000	541870000	709080000
YOL049W	953590000	689010000	860010000	1184500000	915090000	1073100000	893870000	781810000	818950000	908210000	990760000	881230000
YJR068W	1065500000	1127800000	1021000000	907190000	912750000	981180000	965230000	914100000	948020000	1018000000	944300000	988830000
YOR099W	840810000	793150000	1001100000	908980000	912280000	1044500000	607360000	667930000	885400000	1120900000	980300000	1097300000
YHR148W	577130000	754170000	774190000	808760000	910050000	519430000	1115000000	1192100000	731250000	557530000	750330000	446400000
YMR192W	653650000	737080000	649170000	877610000	909760000	883690000	718840000	780100000	626500000	921640000	1082400000	988110000
YDR098C	506780000	723710000	505790000	911170000	909380000	499820000	884850000	894590000	532990000	624530000	1125500000	463330000
YGR128C	1032600000	812380000	1045100000	1086200000	907540000	960520000	1455800000	1288900000	1503100000	1219100000	1227100000	1197900000
YHR113W	1166000000	961420000	1054700000	1019100000	907420000	1188100000	772390000	831650000	963090000	1196300000	1056900000	1125300000
YML115C	836140000	726820000	713080000	993290000	906520000	768170000	916810000	904300000	717290000	767170000	989420000	776970000
YLR083C	911950000	899130000	923060000	819790000	903840000	828290000	1469900000	1390000000	1619000000	1244800000	1159200000	1280000000
YML030W	621880000	709700000	651730000	815420000	900860000	696410000	550340000	526160000	432450000	498020000	490390000	468860000
YMR033W	929560000	861560000	931480000	906100000	899950000	888000000	941280000	1007100000	885840000	863870000	959180000	910370000
YML111W	862220000	900420000	820290000	982010000	899720000	872110000	694190000	752470000	691470000	840050000	845480000	793520000
YAL025C	1406200000	1571900000	1651300000	870750000	899590000	1231400000	1144300000	1199200000	1727000000	1369600000	874440000	1143400000
YDR049W	774720000	824820000	804080000	932480000	898830000	725680000	1075200000	1240400000	921520000	812470000	1156400000	788230000
YOR123C	1011200000	1272300000	974320000	784680000	894680000	878620000	882790000	883390000	867830000	861450000	864780000	986300000
YGR037C	459190000	788690000	337940000	781540000	893890000	406890000	525600000	523850000	141700000	422530000	1140300000	411070000
YNL014W	1368100000	979710000	1089900000	1007500000	889770000	1308800000	1984300000	2115300000	2538100000	1881000000	1518800000	1625300000
YER133W	1387800000	1149400000	1761900000	953020000	888720000	1864100000	880710000	774010000	1678300000	1822900000	984500000	1764400000
YOR089C	819070000	862140000	803240000	951400000	885480000	812070000	856580000	886680000	745930000	1118200000	1104900000	984440000
YHR163W	731800000	687180000	724630000	802640000	885430000	744470000	782020000	701720000	577010000	693220000	721510000	518450000
YDR195W	875370000	866750000	795910000	829190000	884340000	706430000	1018600000	1187700000	804120000	699920000	917090000	715140000
YDR266C	629980000	803330000	593990000	828160000	883590000	504800000	775800000	798910000	537210000	445900000	717640000	444150000
YJL178C	670950000	723970000	587560000	939330000	881610000	712380000	734980000	747140000	622160000	722710000	971270000	731200000
YER002W	1056800000	942230000	1117500000	470740000	881480000	1067000000	854930000	832940000	1308000000	1008600000	590930000	1053400000
YNL267W	986950000	1060800000	1020400000	940840000	880050000	888540000	859670000	936070000	848230000	872780000	862030000	879610000
YDR303C	882180000	776150000	831940000	928080000	878670000	735560000	779160000	814000000	745070000	701000000	757060000	625250000
YLR312W-A	814410000	697710000	707780000	1023200000	877140000	743140000	600320000	536120000	476870000	575120000	608110000	450030000
YOR212W	1144800000	884700000	1068600000	1031700000	876880000	953030000	1019500000	882810000	993760000	902510000	836030000	821410000
YDR408C	885490000	777770000	791950000	958460000	876770000	814440000	790000000	726160000	809620000	673590000	664810000	684850000
YEL036C	783870000	879590000	607580000	990480000	875860000	769870000	877960000	916820000	735000000	675620000	1072600000	689420000
YCL045C	783980000	668000000	733680000	942220000	875650000	783380000	767720000	714280000	675300000	871340000	840090000	758070000
YKL007W	824400000	726910000	829290000	875240000	874600000	816800000	843780000	755400000	767100000	855430000	997000000	878310000
YOL019W	666300000	883840000	703140000	836010000	871280000	750360000	371740000	420270000	344830000	638910000	768030000	639730000
YDR322W	808380000	727570000	840550000	995070000	869580000	943770000	529140000	502150000	497730000	593850000	593950000	627260000
YGL027C	718760000	538500000	716330000	981460000	865090000	921860000	627060000	608640000	724770000	866380000	885280000	850070000
YPR034W	903920000	721010000	924070000	927200000	863720000	1002700000	802200000	735380000	976500000	861290000	939460000	886670000
YLR452C	1160000000	1174800000	1138300000	868160000	863550000	863540000	2059200000	2064200000	2501300000	1572100000	1608200000	1674200000
YBR135W	652440000	710080000	719850000	572380000	863320000	485630000	641700000	809510000	617280000	640090000	697870000	579080000
YPL082C	1064600000	937360000	1107900000	999830000	863210000	1016100000	856010000	860850000	1012100000	844130000	767770000	875510000
YDR093W	796560000	827770000	795770000	940690000	861230000	801920000	807030000	822070000	737970000	755470000	962990000	789420000
YOL093W	556970000	643360000	598330000	716620000	859660000	578400000	854180000	929950000	709630000	663980000	816230000	584900000
YCL014W	589060000	776980000	633050000	765030000	857310000	709440000	720900000	798730000	637560000	657120000	783010000	640020000
YMR149W	521760000	497430000	402350000	839700000	857020000	564060000	629860000	733080000	583990000	623250000	985870000	646480000
YJR051W	733140000	774240000	728610000	849470000	853060000	725150000	660990000	694870000	599040000	719570000	765190000	724010000
YER019C-A	679230000	576100000	692750000	1074200000	851030000	695230000	1031200000	906250000	949010000	759790000	1069500000	728390000
YGL014W	765340000	731010000	787570000	925440000	850030000	808750000	897760000	843320000	817360000	658110000	802450000	610590000
YKL191W	812130000	909370000	929060000	758330000	849940000	772390000	716070000	870600000	884470000	772280000	739480000	719560000
YDR087C	1058000000	959310000	1042200000	940120000	848720000	905970000	1496600000	1560600000	1391500000	995320000	1157400000	1089400000
YHR170W	1108300000	812190000	1221300000	972930000	847630000	1299200000	1307400000	1103100000	1807300000	1398600000	1106000000	1268700000
YKR093W	584670000	604050000	566740000	807700000	842980000	650720000	184430000	189950000	145500000	311980000	451460000	373590000
YMR070W	700170000	1037200000	703070000	743060000	841920000	661710000	666780000	756290000	580480000	553240000	709350000	603630000
YOR222W	681350000	697800000	753270000	928240000	841310000	954610000	540650000	566960000	709010000	768570000	662430000	874770000
YER008C	741970000	765720000	760000000	881110000	840400000	754290000	908100000	887700000	748880000	771630000	849510000	778090000
YDR361C	1037600000	860380000	839000000	813500000	839430000	742330000	957090000	928960000	1058500000	768880000	849230000	807920000
YLR033W	994760000	864120000	1024300000	951170000	839080000	887870000	1579800000	1466500000	1619400000	1282700000	1194500000	1354400000
YCR052W	946180000	1077100000	897100000	937690000	838420000	908070000	927910000	884190000	873760000	887870000	960750000	885620000
YJR001W	772670000	1094400000	938670000	873120000	838270000	876800000	879160000	1005200000	816890000	790690000	859760000	747590000
YPL221W	551850000	520060000	524390000	947540000	837960000	725110000	495040000	513590000	413520000	633990000	765660000	615280000
YLR178C	722660000	728230000	715290000	745550000	836940000	720650000	657780000	623060000	549340000	730190000	735440000	776500000
YML130C	786360000	605360000	770110000	1040500000	836240000	1001100000	721150000	753860000	853740000	1351400000	1318200000	1412200000
YOL051W	709350000	904520000	687380000	781850000	835470000	737340000	691600000	819210000	680530000	608030000	747190000	722480000
YDR161W	1026400000	1139100000	1088500000	747970000	834790000	1000900000	1309400000	1313300000	1518500000	1010100000	1104800000	1202300000
YKL113C	788880000	878640000	858510000	824340000	834420000	711220000	879030000	910130000	856150000	733860000	713780000	739350000
YPL053C	648900000	680570000	679870000	860660000	832910000	814870000	507970000	545690000	514860000	637530000	714270000	635620000
YJL055W	691950000	885190000	673680000	843160000	831450000	657880000	556060000	618990000	430890000	577900000	661820000	546480000
YNR019W	718310000	903310000	606100000	863090000	831050000	626580000	1351800000	1453400000	1515100000	1034300000	1445000000	1202000000
YPR063C	798710000	770020000	864020000	969250000	830620000	796080000	739270000	845690000	677610000	793740000	874640000	703510000
YLR336C	959710000	909050000	950350000	793560000	830170000	720100000	2252600000	2341700000	2393500000	1643600000	1777100000	1791400000
YGR235C	502110000	608930000	558120000	851340000	827960000	606710000	389590000	407740000	341200000	429880000	473200000	416700000
YPR018W	651670000	846920000	671100000	783550000	827650000	608320000	710900000	709490000	588080000	517090000	693520000	491650000
YCR093W	940500000	674610000	963970000	917690000	827360000	1041200000	896510000	843270000	1139400000	1054300000	864510000	998760000
YLR045C	676960000	633190000	682110000	900820000	825960000	735100000	1439100000	1501600000	1346300000	1197900000	1328000000	1269500000
YNL239W	765700000	770260000	803460000	952750000	825220000	904570000	887420000	884990000	824810000	973300000	998990000	951930000
YLR203C	1045500000	946690000	1185200000	813250000	825110000	1249800000	801750000	752430000	1139300000	1279900000	971010000	1171300000
YMR008C	493220000	529400000	551730000	746440000	824570000	758340000	588480000	597680000	528300000	923800000	1108700000	959210000
YOR286W	327230000	415340000	382500000	615000000	824460000	579600000	430310000	425360000	286640000	290820000	382650000	226330000
YCR035C	860000000	927070000	960840000	787370000	822780000	864600000	985930000	1203100000	1036600000	949050000	980600000	988440000
YDR477W	1011800000	784750000	1023500000	920670000	821270000	1151000000	766910000	739030000	916870000	931590000	834740000	920270000
YMR014W	705230000	696320000	717890000	870990000	820400000	667370000	1025800000	1058000000	973770000	667510000	802280000	714480000
YDR047W	1174700000	1050600000	1145000000	786250000	820320000	1094800000	795690000	860760000	1200000000	1082200000	909000000	1174600000
YNL163C	959200000	959820000	957820000	890610000	813650000	951860000	1046400000	938550000	1127000000	1062500000	957340000	993030000
YHR127W	889880000	1079300000	1025100000	653240000	810460000	851760000	793380000	858420000	948630000	868100000	668330000	787490000
YJL168C	700430000	875050000	731350000	795440000	809170000	644200000	769870000	854060000	671800000	595880000	735020000	612330000
YNL139C	785960000	828000000	860440000	794550000	806840000	721270000	720810000	817300000	732630000	741480000	809260000	771370000
YMR212C	759020000	775210000	750260000	871920000	806260000	719270000	768720000	768930000	735140000	705000000	802010000	673650000
YJL166W	606320000	921620000	596450000	745760000	806160000	737260000	425680000	353510000	209350000	395270000	391180000	340650000
YMR039C	1403200000	1361600000	1571100000	670420000	805430000	1373200000	887630000	875050000	1572400000	1868900000	844690000	2123000000
YGR261C	709810000	914810000	741940000	738140000	805270000	735130000	629760000	666490000	641640000	643690000	619860000	642370000
YHR133C	654790000	572500000	621480000	722620000	804210000	613320000	844110000	940150000	742820000	680390000	942430000	645760000
YOR141C	895260000	855030000	858120000	868700000	804190000	822400000	820390000	833130000	790670000	836640000	892230000	895880000
YOR124C	694180000	775840000	697000000	903590000	801580000	887290000	657150000	638970000	732460000	910950000	809740000	871750000
YDL053C	1498800000	1574100000	1681600000	622020000	800720000	1539200000	684940000	634140000	1256700000	1198800000	571880000	1426900000
YMR243C	756780000	733880000	792510000	1029800000	798890000	856980000	862470000	794310000	1050300000	650740000	835850000	751300000
YFR028C	766780000	889530000	779820000	970740000	797570000	814190000	789660000	902090000	675120000	726130000	890000000	794710000
YKL099C	1035000000	1109900000	1282100000	641830000	795280000	1053700000	1092900000	1163900000	1399700000	1113500000	665500000	989820000
YDR465C	920840000	849190000	842470000	788450000	795200000	793770000	1001400000	1074700000	940070000	843280000	824630000	794710000
YKR082W	745420000	659020000	789080000	1030100000	793480000	866650000	869550000	799360000	911690000	872290000	927550000	1003900000
YLR285W	604370000	417290000	492350000	831230000	791470000	447040000	1590000000	1337600000	1055700000	923780000	1605400000	816130000
YGL201C	875780000	876460000	945140000	862510000	790710000	876090000	918800000	903800000	985060000	822430000	842040000	844540000
YOR181W	866090000	874010000	853060000	734640000	788520000	819740000	778070000	814630000	924890000	927830000	787800000	928170000
YNL271C	631290000	761840000	690630000	744000000	785510000	651250000	643050000	759100000	600010000	623720000	741330000	628870000
YGR266W	726200000	681160000	767320000	923500000	785110000	790140000	734330000	724490000	853560000	635330000	843300000	715720000
YDR296W	812600000	913830000	787530000	762150000	785100000	858520000	421690000	392710000	385300000	463520000	440130000	438640000
YBR092C	891680000	1127100000	872140000	649710000	784550000	609700000	1131100000	982950000	905270000	956940000	693390000	996240000
YMR197C	659540000	662460000	685380000	760400000	783660000	782740000	563850000	606780000	562370000	812420000	758540000	938340000
YOL080C	696650000	830700000	742930000	646590000	782130000	553230000	882220000	1063300000	931100000	682090000	730740000	648240000
YLR439W	673660000	620150000	701960000	813190000	777900000	887700000	763370000	575640000	612590000	757440000	644350000	600310000
YOR271C	964580000	828630000	1077700000	885030000	777260000	918880000	1160300000	943270000	1228000000	905950000	912770000	1067500000
YIL162W	404520000	377970000	417580000	641130000	776390000	793490000	1428100000	1425000000	1533800000	1010700000	565230000	973720000
YFL026W	932120000	923890000	811850000	921860000	774860000	639940000	813000000	774820000	656000000	499270000	585200000	482870000
YAL021C	749510000	659970000	809250000	669650000	774790000	879620000	728050000	749410000	857130000	865030000	730750000	815090000
YAL060W	537630000	511300000	564770000	758270000	774710000	886500000	697960000	643890000	774140000	742240000	714970000	732510000
YHR149C	800540000	859820000	719380000	730580000	773850000	528720000	799670000	840390000	663980000	579280000	679400000	528210000
YPL274W	430280000	551650000	370590000	972330000	772710000	496920000	659020000	736130000	493910000	431980000	686470000	483790000
YGR210C	1052200000	910100000	1089900000	950240000	771520000	925890000	905400000	897850000	1006700000	810780000	808360000	874980000
YPR169W	923000000	908740000	902160000	869160000	770110000	820850000	970980000	1011000000	976100000	769650000	760370000	792840000
YNL161W	728410000	706870000	835160000	745370000	768640000	893200000	694980000	688450000	849010000	850740000	767390000	865010000
YOR216C	716970000	717080000	570570000	666770000	766340000	579750000	610990000	636960000	534150000	549270000	721650000	567620000
YGR281W	722490000	651550000	720190000	791830000	765750000	666510000	714730000	679120000	634030000	774330000	839630000	773700000
YLR350W	766540000	670090000	630220000	693330000	765030000	531370000	1650800000	2050200000	1349300000	2050300000	2734400000	2088800000
YGR049W	351220000	265010000	589710000	602530000	764900000	386270000	998990000	1146600000	1130400000	664940000	1463100000	716510000
YML110C	729890000	728080000	792300000	816590000	764700000	791720000	550380000	518440000	634520000	688280000	768090000	706840000
YBL032W	1048500000	833240000	978750000	870250000	763170000	892350000	520620000	544880000	613190000	572070000	480610000	602490000
YKL101W	502300000	565060000	529260000	729090000	762260000	575640000	405950000	469070000	368620000	633040000	672770000	588690000
YJL124C	1050800000	881700000	887020000	770830000	760480000	822200000	880570000	728140000	889680000	780480000	745620000	830390000
YGR220C	661440000	732120000	758510000	740760000	760040000	672950000	314540000	376400000	356640000	501500000	493020000	455320000
YDR395W	575370000	547720000	559290000	945250000	759720000	660210000	954490000	896400000	890890000	772580000	964850000	888980000
YIL117C	198580000	213870000	181030000	805340000	758900000	542010000	540310000	546220000	457710000	1264200000	1614900000	1160100000
YLR182W	750230000	717580000	716970000	701330000	757420000	699500000	1133200000	1246600000	1080600000	1034000000	1064400000	990170000
YCR034W	551410000	583480000	498200000	730860000	756170000	814540000	309120000	325480000	448020000	435300000	411090000	455420000
YJR075W	686800000	518260000	743270000	861490000	754630000	822350000	679030000	720510000	746870000	601110000	714320000	639140000
YOR283W	913380000	911590000	802680000	896280000	754490000	715800000	1099200000	1139600000	1159100000	825960000	918590000	891820000
YGL172W	675160000	718640000	705580000	850920000	753940000	711530000	814510000	736510000	692240000	654160000	796330000	643210000
YIL030C	575110000	556400000	550710000	779770000	753260000	525190000	724330000	715810000	659870000	578820000	698870000	566640000
YNL102W	961230000	897950000	1014500000	856510000	753030000	1010600000	676680000	648630000	915420000	746310000	637100000	793360000
YCL057W	686650000	713210000	729660000	895750000	751880000	860890000	712310000	636930000	732430000	822160000	861840000	846780000
YNL298W	706750000	825900000	735440000	725580000	750210000	655780000	769420000	726960000	709300000	652190000	716570000	612800000
YJR134C	639090000	839460000	666080000	716230000	747770000	657640000	545440000	606560000	550180000	536270000	715120000	582640000
YOL094C	709780000	667330000	780130000	857690000	746710000	800080000	850620000	817300000	918070000	842560000	854950000	827700000
YKR006C	406860000	566110000	504360000	601470000	746680000	522270000	341470000	383550000	285670000	338250000	410240000	272720000
YDR311W	629790000	774250000	646200000	748660000	746250000	632910000	811410000	869970000	700680000	707080000	831460000	735860000
YKL021C	901610000	705370000	1032400000	763110000	746040000	955140000	1119100000	874740000	1494400000	1089700000	956230000	1043100000
YNL062C	966990000	1016400000	1034600000	725710000	745740000	938160000	845190000	836530000	982810000	887650000	812530000	962030000
YML080W	769710000	789090000	760230000	790070000	745470000	684480000	847300000	813190000	812680000	590520000	665990000	681500000
YOR075W	624640000	533540000	686580000	798320000	744400000	766760000	784800000	772470000	623010000	699010000	807550000	790130000
YNL312W	575260000	531870000	414960000	789200000	743880000	660570000	666520000	601390000	457810000	524940000	731560000	630650000
YNL315C	555410000	690960000	562990000	699710000	743220000	610260000	325360000	370370000	284400000	384540000	511120000	389990000
YJL165C	670450000	736100000	644580000	711190000	742430000	659730000	644250000	732320000	639030000	713750000	841490000	687940000
YDL124W	609180000	508450000	575530000	700620000	739720000	699020000	371510000	295950000	341970000	1575900000	1395800000	1443100000
YGL130W	756360000	700540000	683440000	770410000	732040000	662060000	646140000	647980000	616280000	636560000	695100000	650090000
YDL166C	936630000	928780000	888540000	675930000	731910000	858310000	1063100000	923960000	1097100000	985260000	831250000	934330000
YKL028W	676520000	761840000	708930000	646360000	728790000	594110000	739640000	788360000	766510000	740290000	779120000	745410000
YBR101C	680400000	574380000	646300000	974250000	728600000	883110000	988820000	912560000	1081800000	939140000	1025000000	888040000
YDR117C	525180000	456440000	502850000	744260000	728240000	573180000	627970000	676050000	494180000	537240000	703660000	540780000
YIL062C	453700000	574610000	498730000	605150000	727410000	563500000	526010000	551820000	366730000	457570000	673590000	463890000
YOR074C	932990000	849400000	947600000	864650000	727140000	920130000	654830000	679750000	890400000	849120000	726710000	774870000
YGL203C	696990000	668040000	700190000	736590000	726420000	745310000	690020000	659910000	648390000	745890000	731330000	700990000
YHR206W	737420000	830920000	662410000	749850000	725930000	580130000	788790000	789910000	667480000	665110000	771790000	586820000
YJL019W	937630000	847210000	944910000	905470000	725460000	855410000	632160000	695920000	617610000	722750000	566950000	642670000
YGL252C	942910000	777040000	1033900000	794810000	723930000	1129700000	653440000	622170000	955840000	1103100000	837710000	1073000000
YDL086W	957870000	793250000	1094400000	739870000	723900000	1053800000	884150000	910510000	1420100000	1168800000	845840000	1315000000
YPL178W	790400000	837670000	774370000	609170000	723840000	767610000	542650000	698660000	757250000	767390000	575880000	780060000
YLR397C	937240000	790820000	866760000	822750000	721480000	906700000	2128600000	1906400000	2272600000	1851400000	1837800000	1808100000
YBR261C	576360000	719100000	568540000	841560000	721240000	540790000	1022500000	1050000000	756240000	665050000	898950000	630080000
YIL015W	943810000	1097700000	852370000	712220000	719920000	667040000	374970000	443330000	397640000	476660000	498460000	477070000
YNL149C	716810000	737890000	849810000	512780000	719840000	686290000	547490000	611310000	606590000	629140000	477880000	596710000
YBL069W	772320000	871610000	840090000	825230000	718710000	766280000	902470000	820070000	837350000	741840000	767980000	671390000
YER182W	677000000	790400000	811350000	645700000	717360000	811630000	443880000	457140000	440210000	571350000	484520000	599560000
YGR270W	759110000	767830000	743730000	705590000	716930000	731820000	547020000	577770000	559730000	636910000	688000000	663370000
YGR202C	700570000	850970000	662950000	717340000	716680000	577050000	552740000	620560000	449420000	344550000	504180000	409100000
YLR008C	815100000	812100000	909540000	653640000	716510000	895460000	818570000	819860000	1071400000	880040000	589620000	921060000
YBL051C	662700000	833570000	629810000	743760000	715770000	628790000	800240000	841730000	638640000	627390000	756750000	647170000
YGR088W	1005400000	1088000000	952960000	802770000	715710000	658350000	491600000	172970000	84060000	582620000	355620000	631820000
YKL215C	733210000	711030000	782330000	736520000	713060000	796700000	721420000	741650000	871150000	892830000	780220000	886070000
YFR055W	1245300000	813310000	1281500000	926960000	712800000	933050000	1157200000	913410000	1289200000	1254400000	1004800000	979390000
YPR073C	700310000	764980000	750410000	596210000	712510000	683200000	502510000	494930000	551350000	620590000	502900000	623950000
YJR076C	893280000	685990000	781530000	968080000	711960000	963000000	1040800000	939170000	1103300000	1011700000	1026900000	971420000
YML016C	478230000	631530000	485980000	756360000	711540000	638280000	594520000	607050000	539280000	735970000	914870000	804690000
YOR112W	682140000	679990000	614550000	730390000	710890000	712650000	623470000	667550000	606720000	659940000	654520000	614630000
YDR297W	475790000	582710000	431690000	767890000	710270000	599520000	659660000	589280000	585390000	495990000	665440000	720690000
YER149C	562020000	632750000	645860000	694060000	710170000	593570000	887790000	917720000	838280000	669720000	876580000	660000000
YBL056W	890520000	712650000	849820000	621970000	707720000	918080000	550730000	634610000	685710000	670040000	575230000	754970000
YNL180C	560230000	548410000	555820000	714620000	707700000	559240000	578930000	570070000	490890000	498290000	631220000	563180000
YHR074W	794000000	688080000	870460000	762110000	706520000	851140000	687620000	622450000	883610000	919500000	772160000	1005400000
YNL256W	922880000	836110000	990730000	816000000	706110000	992670000	865130000	698000000	1157900000	972460000	767210000	982730000
YOR220W	724750000	814300000	722710000	689820000	702890000	696520000	858390000	872990000	788550000	1189400000	1362100000	1233700000
YJL031C	620220000	530610000	643580000	739110000	700290000	767000000	703060000	604930000	846560000	910250000	674610000	798350000
YDR316W	477030000	546250000	525000000	789290000	698780000	782350000	323700000	320030000	341090000	470370000	461830000	409380000
YER154W	638180000	593110000	672100000	664330000	697820000	763480000	337460000	361990000	374950000	390890000	402930000	544790000
YNL208W	879070000	1003200000	1181900000	548350000	697420000	1289800000	576860000	524080000	890830000	2015600000	1347600000	2783000000
YMR140W	598860000	650090000	598690000	734230000	697360000	571960000	619540000	656970000	693070000	639720000	789100000	763880000
YLR113W	569550000	506390000	618630000	816890000	695820000	720450000	1093100000	1111300000	1247100000	1387500000	1221600000	1385600000
YGL242C	867420000	975290000	1007300000	507080000	694630000	921650000	544750000	580960000	780960000	1269600000	638750000	1202400000
YBR234C	854020000	657300000	853680000	734360000	694470000	1014900000	614880000	594500000	879050000	1122700000	753110000	889470000
YCR073W-A	918970000	898480000	1007700000	755600000	693620000	836360000	900650000	932180000	1043200000	1018800000	1014500000	1063800000
YFL023W	684200000	882160000	665870000	637090000	693430000	594840000	732900000	865010000	679320000	616110000	734330000	643940000
Q0250	799210000	562650000	986920000	910760000	693080000	1358400000	434290000	311790000	421500000	547200000	526260000	600660000
YER063W	925050000	967180000	1434300000	506020000	692080000	1456700000	342550000	324880000	670200000	856970000	374860000	999940000
YDR320C	576340000	641150000	576440000	711780000	691660000	586950000	721670000	748160000	526590000	671870000	849030000	684190000
YER062C	730440000	753200000	630370000	614990000	691030000	528040000	461740000	365360000	303230000	698770000	772330000	671230000
YER176W	835140000	849750000	857360000	752400000	690850000	811010000	828810000	823180000	970070000	812760000	727360000	818920000
YCL029C	603850000	602020000	604990000	641820000	690770000	598040000	656390000	654100000	594760000	568780000	592410000	541580000
YNL183C	613170000	733040000	585610000	726460000	690400000	595860000	504250000	552860000	463750000	546720000	638260000	519430000
YML094W	308550000	472670000	362810000	457790000	689880000	385270000	672980000	736830000	406060000	378250000	531160000	277060000
YMR016C	752220000	807020000	702100000	729670000	688870000	684640000	774970000	805270000	731840000	691970000	720860000	642930000
YIL155C	445620000	375550000	484320000	947050000	687940000	909560000	505650000	339320000	389940000	529060000	365750000	364110000
YDR406W	603600000	623080000	712040000	858980000	687860000	979830000	733820000	633890000	846020000	866660000	1049100000	835650000
YAL017W	659080000	723760000	630230000	766690000	686380000	757450000	522320000	556230000	502880000	616090000	652740000	648100000
YNL059C	702250000	759420000	682090000	661230000	684460000	647580000	657300000	710250000	662140000	644870000	714770000	632150000
YPR171W	612240000	893230000	680250000	680520000	684310000	522610000	547890000	674570000	518050000	442580000	593300000	464090000
YMR285C	724420000	767530000	748450000	674670000	683900000	593470000	726250000	763260000	785540000	680310000	760200000	716980000
YER148W	755260000	748010000	732330000	748170000	682620000	777410000	751310000	762750000	870930000	772930000	798430000	673070000
YFR006W	777810000	694060000	809790000	739620000	682470000	924150000	461840000	404550000	463410000	664490000	548720000	639100000
YGL056C	669180000	549110000	709410000	769560000	681900000	584300000	776030000	782210000	856340000	637520000	753280000	576320000
YLR430W	681320000	707060000	653210000	741460000	680900000	619190000	1635100000	1692300000	1504600000	1391800000	1478300000	1330100000
YMR013C	86427000	648190000	281850000	799880000	678400000	338590000	514370000	638650000	386390000	515280000	526330000	520470000
YGL232W	723670000	854640000	674820000	749330000	677920000	564270000	955850000	1021000000	700520000	656440000	688890000	623990000
YER123W	675840000	841770000	740630000	730130000	676890000	603040000	565060000	637720000	479140000	526080000	648870000	544560000
YBR273C	512740000	745880000	537930000	646650000	676780000	526000000	592450000	636180000	459740000	511180000	596490000	528070000
YML127W	1004300000	913580000	1021600000	762430000	675610000	959390000	855870000	805320000	1011800000	894620000	774400000	907240000
YGL086W	678810000	729770000	666160000	709720000	672670000	668380000	716090000	747640000	687250000	717280000	838940000	732780000
YAR042W	684740000	665200000	660840000	710220000	672440000	702600000	728580000	693380000	673230000	740380000	810060000	707780000
YIR034C	1162100000	1122400000	1157800000	775460000	671310000	910160000	910230000	830920000	971650000	962390000	731560000	1013200000
YBR177C	667610000	638020000	690810000	707730000	670440000	931000000	781040000	684090000	822690000	950710000	746790000	1028800000
YOL010W	893090000	615080000	837410000	792990000	667270000	776200000	1008800000	938170000	1220500000	1006100000	823930000	1004700000
YDR257C	834340000	790790000	768250000	556240000	666510000	801430000	786740000	722790000	921830000	965950000	807920000	1040800000
YLR220W	671650000	602610000	653370000	620940000	665830000	571810000	839730000	902390000	878850000	787860000	893200000	810280000
YGR084C	777840000	821390000	868590000	779160000	665460000	1002800000	344970000	331770000	377220000	495720000	449420000	560800000
YEL020W-A	214000000	377890000	246650000	568760000	665450000	310170000	372100000	382610000	224080000	229570000	573410000	187880000
YOR337W	530420000	554270000	561620000	664910000	664570000	748050000	546680000	524400000	538730000	602230000	133710000	584450000
YDR518W	540460000	524920000	494910000	828740000	663050000	531830000	683540000	704030000	572560000	843670000	1101500000	900200000
YIL140W	400380000	467060000	415790000	608630000	662180000	566120000	268100000	290980000	261610000	405930000	488710000	398420000
YKL006C-A	256430000	313310000	219110000	622010000	660020000	266440000	188320000	296670000	165780000	202340000	658620000	228100000
YIL044C	580430000	723820000	594730000	602510000	659810000	482080000	611840000	668120000	452710000	521770000	635750000	562880000
YOL031C	500820000	544430000	483620000	584620000	657780000	559490000	420470000	533960000	394200000	931160000	955940000	871940000
YBR256C	489380000	393840000	539960000	631850000	657110000	599470000	589900000	470940000	549980000	631760000	788420000	660140000
YKR002W	752990000	682740000	810900000	712780000	654760000	884150000	631170000	568360000	778270000	711790000	720410000	754140000
YGL169W	945200000	879420000	824840000	667730000	654530000	707580000	814120000	798600000	814340000	704530000	640230000	673410000
YMR125W	613330000	589180000	634410000	793900000	653830000	640170000	695880000	634210000	787720000	690620000	696580000	687630000
YOL140W	741170000	820270000	774730000	672210000	653580000	780290000	391770000	416930000	485230000	463360000	449830000	454500000
YGL062W	829950000	797770000	956340000	787550000	652930000	875470000	764260000	716980000	774120000	766390000	776150000	914240000
YNL173C	580530000	573040000	562810000	588540000	652720000	560690000	348540000	376370000	361110000	302380000	309420000	303010000
YJR137C	449960000	412780000	455690000	741620000	652280000	707240000	286250000	317200000	386130000	436180000	382310000	532620000
YGL181W	536450000	691170000	580450000	620310000	650340000	537380000	637370000	620730000	520500000	565680000	663470000	604370000
YGL035C	677960000	801820000	611030000	551790000	650170000	555340000	558410000	635860000	524940000	450920000	535240000	447920000
YOL143C	423160000	494010000	476550000	542300000	648730000	383970000	416400000	468860000	349610000	319380000	448800000	310950000
YOR188W	583410000	653940000	552600000	590460000	648020000	552610000	574980000	664590000	548990000	505410000	646640000	512660000
YML125C	506740000	419870000	457370000	747650000	646680000	466700000	767090000	695010000	576470000	599710000	710330000	545970000
YCR036W	460940000	401110000	508160000	584770000	646430000	539720000	427210000	417550000	412030000	651260000	756240000	538110000
YCL035C	337020000	525080000	510330000	408070000	646060000	458070000	421090000	453010000	265380000	446630000	586730000	372150000
YPL170W	460640000	542800000	571000000	492290000	645080000	592890000	510770000	491070000	487060000	616100000	582710000	588260000
YNL156C	404140000	560330000	378100000	591270000	644540000	370250000	590250000	654250000	487430000	531220000	747090000	547420000
YIL105C	601630000	632640000	633340000	633680000	644200000	637130000	609270000	627820000	581830000	713560000	683750000	623140000
YKL164C	615710000	652990000	627850000	549140000	644170000	621240000	594790000	672820000	649270000	691780000	724810000	713250000
YJR017C	623920000	848130000	851580000	513670000	643590000	807830000	467510000	448350000	561000000	675120000	510630000	761380000
YIL005W	561510000	533780000	547280000	629530000	642200000	587420000	411800000	360970000	403970000	428930000	485690000	449990000
YKL213C	587010000	541950000	630820000	750730000	642050000	633150000	690400000	658130000	639050000	876170000	913620000	789040000
YDL088C	586430000	702900000	559520000	580480000	641920000	535360000	498410000	598440000	436000000	491260000	490760000	503980000
YDR169C	540610000	612920000	513960000	599210000	641490000	511130000	402550000	487970000	360630000	466060000	571250000	509080000
YGL023C	560460000	624750000	568750000	576670000	641250000	553940000	555380000	638990000	464490000	544730000	597080000	632450000
YLL015W	435540000	373640000	373200000	631510000	639440000	500130000	930490000	870300000	860450000	884470000	1121600000	835490000
YBR081C	533180000	565940000	530520000	661630000	638590000	553930000	611190000	707250000	614490000	507600000	638080000	552940000
YHR110W	266570000	195790000	406340000	615000000	638200000	435950000	389130000	225190000	265920000	300230000	477820000	342490000
YKL063C	585380000	698940000	621870000	504290000	637390000	628930000	635760000	576750000	551770000	507850000	607230000	444020000
YPR091C	486140000	530440000	484260000	644080000	634170000	530770000	443580000	416820000	371180000	431190000	523390000	421250000
YBR061C	689010000	683260000	602880000	642140000	633870000	583000000	715700000	746590000	738880000	694250000	686010000	628040000
YHR028C	374110000	91575000	812300000	736930000	631690000	525010000	179300000	141250000	274680000	496080000	390850000	583130000
YOL057W	749570000	651270000	746690000	773990000	631040000	820710000	684220000	626800000	731300000	859360000	824320000	865280000
YLR221C	1307000000	1528500000	1304400000	485860000	631010000	1134300000	968900000	967040000	1857000000	1398900000	657380000	1883500000
YGR274C	531350000	579980000	490430000	559710000	630370000	432390000	598550000	679410000	487320000	475640000	568950000	491160000
YMR161W	596250000	612350000	619930000	550810000	629960000	430990000	681580000	676860000	506810000	466360000	640010000	517680000
YMR058W	682680000	528590000	656890000	659810000	629010000	477400000	769850000	770100000	548560000	505700000	709380000	470340000
YAL007C	363460000	391660000	316350000	666580000	628940000	415400000	518580000	623050000	374950000	428460000	756190000	420480000
YKL170W	874580000	1085700000	918350000	526990000	628780000	1065800000	321690000	378880000	501820000	593590000	325470000	723690000
YER056C	644150000	825150000	611450000	642390000	628460000	591970000	893040000	819290000	714400000	628600000	822200000	768490000
YOR290C	593810000	695470000	557550000	651300000	628290000	500350000	493940000	553630000	462020000	452670000	506100000	448940000
YAL059W	1085000000	1156400000	1604600000	411140000	627180000	1387500000	791860000	745960000	1803700000	1238000000	426430000	1354300000
YNL049C	614470000	471210000	617700000	661400000	626490000	729870000	445860000	468490000	568350000	743310000	707950000	742340000
YOR287C	1056900000	971800000	1012600000	472440000	623650000	844020000	874400000	937530000	1410200000	974280000	586890000	1054400000
YJR098C	694920000	556330000	644090000	474660000	623490000	415170000	1074700000	918120000	850000000	824760000	772460000	666360000
YKR080W	612980000	520280000	582670000	709200000	623070000	571720000	662970000	612870000	657910000	460710000	523160000	372830000
YML117W	424210000	547710000	410060000	681070000	620520000	564380000	457380000	495760000	389490000	596760000	665030000	531190000
YBR160W	740060000	705490000	811330000	714940000	620390000	855970000	820710000	772060000	1090700000	1261700000	1027200000	1312100000
YEL043W	563300000	664140000	593140000	618520000	619570000	519800000	559670000	588250000	485320000	497520000	605920000	461560000
YDL019C	607170000	633460000	595280000	607720000	618680000	558430000	456870000	406210000	390210000	410390000	432600000	395970000
YKR008W	585110000	474350000	637410000	682970000	617980000	556690000	692370000	637830000	606180000	566470000	612960000	540850000
YPL195W	531990000	546580000	556610000	602660000	614670000	535340000	615400000	631240000	509990000	533960000	591620000	516410000
YBR126C	948120000	681980000	1042500000	792040000	613990000	1299400000	454770000	346500000	669530000	961840000	620390000	1041700000
YAR014C	493240000	617230000	480220000	546640000	613450000	423060000	491900000	528820000	441630000	422740000	443700000	399710000
YOL016C	565690000	579670000	597880000	663220000	613090000	616000000	725090000	689670000	730000000	1393200000	1325800000	1335200000
YGR019W	596500000	579140000	660710000	668040000	613060000	744350000	598640000	523650000	529040000	1015500000	706130000	966830000
YBR212W	527070000	604380000	550550000	649180000	612050000	516140000	402520000	415830000	308260000	371580000	469990000	375470000
YJL087C	592690000	542380000	595000000	677670000	611010000	644010000	728970000	647100000	695440000	577210000	659230000	596890000
YER094C	604030000	505660000	605470000	758070000	609960000	767250000	656070000	584450000	680460000	687930000	662110000	868520000
YBR082C	676120000	532270000	588250000	571600000	609440000	622920000	717970000	649770000	689180000	674120000	635790000	695090000
YLR105C	656040000	664860000	596500000	691190000	608980000	573970000	933020000	924910000	748320000	778890000	850150000	720650000
YIL116W	595350000	494570000	618920000	721420000	605570000	673250000	803830000	889280000	1015400000	967760000	1000600000	1114300000
YHR077C	475660000	497170000	479190000	554640000	605290000	447980000	708450000	752200000	613400000	590210000	652150000	548050000
YLR187W	612550000	653980000	596660000	628640000	605210000	600000000	1255400000	1427600000	1345200000	1206000000	1280900000	1098600000
YIL108W	468850000	383530000	483230000	697470000	603790000	740340000	518800000	432840000	559040000	1211800000	1029200000	1249600000
YDL092W	1471000000	1867300000	1364800000	490270000	603350000	1200600000	666970000	604340000	1142600000	1112500000	470880000	1217700000
YPR103W	693810000	478580000	667210000	696920000	603190000	788290000	723970000	559860000	760570000	806910000	703110000	929420000
YBR094W	586930000	543260000	572950000	663010000	602490000	689980000	675710000	587080000	786510000	755110000	719260000	744160000
YPL184C	725750000	680870000	793220000	603000000	601580000	753570000	539720000	535530000	665290000	706560000	596090000	709600000
YBR281C	775120000	670350000	847930000	762940000	600060000	990080000	713120000	627520000	964660000	897540000	753850000	1036500000
YFR031C	542050000	510840000	536890000	584920000	599520000	545890000	493120000	574460000	463930000	514090000	592600000	557180000
YIL074C	599970000	596470000	644560000	601720000	598090000	630100000	490150000	523530000	528720000	534680000	523610000	545420000
YOR043W	455430000	507470000	439780000	613250000	597640000	554630000	429380000	428270000	395820000	451700000	491620000	428080000
YKL059C	502730000	688600000	508720000	608850000	597430000	448090000	568410000	629890000	422220000	430630000	626240000	460840000
YFL036W	563780000	620550000	630220000	578190000	597380000	673770000	316710000	369240000	456290000	456690000	425650000	465640000
YJR080C	487430000	462100000	551910000	648470000	596510000	767120000	337850000	291660000	302380000	466670000	446700000	443610000
YNL212W	607660000	572260000	607830000	622290000	594130000	584350000	512910000	512950000	488850000	550060000	557940000	560980000
YDR207C	535140000	636070000	545040000	536700000	593650000	460570000	538500000	637010000	440570000	352290000	519730000	394680000
YOL005C	592300000	799650000	628200000	426840000	593560000	731570000	575020000	594180000	536640000	622460000	514050000	569810000
YDR088C	671330000	789070000	675010000	436130000	593300000	644490000	511370000	662220000	653240000	658030000	576500000	681390000
YIL123W	281660000	310190000	265440000	587120000	593080000	612520000	192290000	186690000	184270000	971310000	927680000	1008900000
YLR200W	209090000	291640000	187170000	414040000	593080000	310920000	801010000	740510000	269020000	305670000	767920000	281320000
Q0140	378140000	365780000	402820000	631950000	592230000	512370000	384050000	344940000	290680000	288170000	347240000	322060000
YMR219W	575480000	601370000	531490000	550700000	592020000	455120000	452480000	532590000	400070000	453970000	548970000	434300000
YJL180C	429210000	471520000	432630000	574030000	591420000	633670000	204540000	220350000	237200000	343790000	320360000	273750000
YNL022C	545780000	529090000	602720000	705560000	590260000	485100000	796540000	773910000	650010000	568960000	713600000	556000000
YPL010W	1009600000	788270000	1079600000	649260000	589720000	1239200000	545220000	520560000	959400000	1063900000	559650000	835390000
YNL045W	712880000	683720000	807180000	509200000	589550000	800810000	433260000	434620000	644520000	658240000	466250000	770410000
YHL002W	597890000	657720000	604980000	520360000	589160000	613850000	561000000	673920000	577520000	721510000	736560000	662190000
YGR200C	782570000	570740000	888900000	659280000	587610000	944030000	728370000	618140000	1140600000	898500000	690050000	934070000
YPR086W	645730000	623120000	646590000	591970000	586520000	630090000	609650000	692350000	655000000	650170000	675250000	644910000
YPL180W	604240000	696920000	612070000	542030000	585700000	491880000	569930000	603590000	505310000	492980000	557980000	540050000
YBR026C	463110000	414710000	450820000	691090000	585500000	685760000	394150000	276610000	260490000	388950000	306200000	304600000
YGR233C	513080000	502070000	597750000	564880000	585480000	844630000	587450000	525710000	671020000	705530000	478300000	669140000
YIL124W	491410000	515470000	545980000	537350000	585260000	648480000	349420000	323960000	406720000	564470000	443900000	520830000
YGL066W	506090000	637540000	520310000	512360000	583700000	436030000	485070000	578850000	431830000	378350000	536140000	421650000
YNL129W	557120000	627640000	639720000	586900000	583620000	704560000	698380000	665100000	1094000000	913710000	680090000	891510000
YLR421C	1184000000	1132200000	1411400000	479850000	583390000	1318500000	1223400000	1094400000	2368700000	2115200000	870000000	2355500000
YDR390C	766170000	589190000	778940000	730610000	582410000	683570000	622440000	602750000	719270000	704800000	684700000	641990000
YOR370C	625970000	604860000	649920000	566080000	581840000	638690000	466810000	427330000	550860000	557430000	479930000	541840000
YPR161C	494580000	682950000	526790000	655020000	581410000	542060000	559180000	593370000	503340000	492550000	623620000	519920000
YPL249C	500250000	556850000	411310000	640770000	580280000	433680000	507500000	548060000	393450000	507000000	706030000	563770000
YOR150W	479410000	651050000	573390000	501780000	579320000	649950000	302080000	280980000	350050000	351130000	276020000	341300000
YER065C	136370000	171220000	115130000	676330000	579040000	545510000	219800000	137870000	118230000	650160000	469360000	446670000
YDR452W	610350000	543570000	622570000	463160000	578770000	823040000	358300000	352810000	524690000	531470000	395900000	532430000
YHR032W	447660000	550850000	423290000	602380000	578750000	482020000	661350000	744950000	627470000	563800000	718600000	565750000
YDR069C	53802000	37309000	73150000	105280000	577730000	79187000	67918000	43230000	103540000	129060000	54731000	96498000
YOR359W	482470000	583680000	485150000	606070000	577420000	359130000	553460000	667660000	407360000	390920000	482470000	389530000
YKL193C	550210000	527390000	583790000	670870000	575850000	603180000	508400000	432950000	427280000	538930000	605480000	593290000
YKR065C	506310000	533910000	554830000	627470000	575050000	656940000	424010000	400050000	482550000	433730000	465930000	503830000
YMR250W	582000000	461040000	579330000	556080000	574470000	652890000	219470000	168120000	148990000	256730000	264500000	257230000
YNR015W	718890000	768520000	747010000	704720000	574290000	696050000	699360000	607470000	642460000	616840000	568020000	603770000
YOR163W	564680000	702930000	613980000	496970000	572330000	617440000	402500000	359440000	398210000	534980000	419070000	542290000
YOR132W	497570000	467870000	467340000	519360000	571970000	499030000	423770000	438360000	449880000	509860000	531610000	501560000
YGR009C	553810000	750340000	631010000	581830000	570700000	507220000	548080000	596100000	474180000	515760000	555350000	509170000
YLR321C	564720000	614880000	536990000	621810000	570020000	442900000	780730000	779950000	635530000	601040000	650910000	623580000
YLL029W	608880000	557740000	596120000	632710000	568740000	605360000	1099000000	1041500000	1124800000	1195000000	1154400000	1191800000
YLR454W	515550000	486080000	464040000	519130000	568400000	591710000	754440000	758460000	795480000	830780000	754080000	845580000
YLL022C	665820000	714840000	572600000	613530000	568230000	654260000	1274500000	1207000000	1184300000	1169500000	1203100000	1169100000
YJL098W	485020000	537370000	510140000	567160000	567180000	412310000	602160000	655140000	565070000	423220000	540070000	425100000
YPL129W	790990000	829910000	775610000	764490000	566980000	862540000	868430000	926730000	910500000	903520000	770390000	899940000
YOR330C	647760000	601150000	517460000	471090000	566350000	516090000	681800000	727570000	586120000	549370000	475000000	441420000
YHR013C	674460000	627460000	760760000	553180000	566330000	625400000	686430000	559410000	689930000	630270000	532090000	521260000
YLR059C	437830000	367800000	469780000	559250000	564990000	574060000	1000100000	933510000	1005700000	965560000	1012800000	909520000
YKL032C	453070000	573220000	431670000	518420000	564730000	423410000	511730000	582080000	387600000	373810000	574420000	420110000
YGL238W	778580000	577040000	845390000	722050000	563890000	883510000	834400000	711300000	1050800000	944280000	909050000	1020100000
YDR051C	535410000	571450000	548770000	537020000	563720000	483030000	696020000	693070000	647660000	544300000	669790000	581310000
YDR036C	479670000	459630000	473560000	644290000	561470000	606960000	414530000	357270000	336320000	465360000	428480000	428670000
YBL105C	532480000	550120000	554260000	493580000	561350000	541640000	437700000	486820000	483030000	505050000	446880000	481500000
YML052W	467430000	477180000	382570000	536410000	560690000	341730000	458460000	526140000	307580000	299960000	470990000	240670000
YLR195C	805590000	548510000	879120000	667550000	560560000	792970000	1141900000	1014300000	1487100000	1281700000	1226200000	1237800000
YDL112W	627190000	547750000	600650000	680180000	559450000	596370000	707620000	587980000	678360000	591720000	637500000	639380000
YDR485C	540800000	881820000	507390000	591830000	558620000	560960000	584480000	626990000	453420000	357170000	457600000	529190000
YLR287C	484250000	446230000	463430000	736500000	558080000	657700000	1536000000	1481000000	1763700000	1229900000	1641500000	1380800000
YDL135C	674400000	638820000	732000000	610600000	557520000	867670000	503430000	489460000	601710000	773280000	576520000	790240000
YLR086W	379840000	451460000	397090000	514400000	557500000	423430000	779370000	839970000	641270000	616190000	745080000	593070000
YDR312W	431790000	489430000	439130000	492010000	557260000	438290000	568180000	591250000	464970000	376360000	422860000	417750000
YGL212W	429540000	546500000	433660000	466680000	556830000	449290000	450890000	455690000	433560000	412710000	475480000	384900000
YDR322C-A	153740000	253590000	176000000	258320000	556710000	274760000	108930000	101630000	64938000	121820000	143740000	108260000
YLR447C	764680000	508210000	936140000	686640000	555410000	895710000	1119800000	823060000	1317500000	1469700000	1052700000	1286300000
YHR197W	574990000	444850000	490830000	550050000	552660000	508770000	751570000	838230000	776940000	595670000	703480000	706040000
YJL060W	335990000	325260000	346000000	567480000	552060000	467510000	237020000	251060000	268770000	470350000	443770000	460000000
YPL188W	699460000	698530000	779830000	544840000	549990000	1009700000	475330000	433400000	780140000	898010000	581730000	870960000
YHR147C	446670000	497960000	419680000	553120000	549490000	519320000	287510000	292350000	269200000	274370000	315000000	270570000
YJL145W	622830000	533260000	644030000	679980000	549430000	704350000	629770000	589790000	802020000	736900000	731830000	750720000
YIR036C	461460000	487470000	454080000	562980000	548350000	615220000	417710000	410160000	407750000	509750000	550870000	544070000
YPL059W	505320000	538630000	675570000	368390000	548250000	641910000	443920000	433440000	453050000	498060000	382420000	469780000
YLR324W	560320000	608430000	543790000	568000000	546930000	568440000	879650000	840450000	782100000	917300000	1004200000	1084500000
YEL055C	745400000	476320000	727570000	684150000	546480000	793220000	686650000	569250000	971750000	764990000	648730000	756820000
YOR357C	539510000	608930000	590480000	422820000	546330000	490530000	541930000	500740000	508380000	533400000	487560000	496640000
YHR111W	550800000	580610000	602420000	530250000	544250000	505360000	501140000	527400000	570680000	571220000	596620000	621290000
YDR464W	508850000	656960000	481560000	551050000	544090000	445120000	569410000	623730000	453780000	410270000	476200000	403500000
YNL192W	409160000	401210000	376470000	577660000	543610000	455830000	371600000	393240000	314070000	565700000	705520000	526470000
YNL015W	310440000	357980000	203180000	399950000	542240000	354000000	206430000	173520000	121400000	321150000	452540000	352130000
YDR138W	431950000	495200000	398260000	573770000	541700000	399680000	567080000	546720000	421890000	474370000	565420000	480150000
YOR303W	562500000	510990000	590100000	714850000	541170000	675420000	633970000	636210000	796900000	628230000	623030000	562980000
YGR183C	192380000	499600000	166130000	451880000	540990000	316390000	146450000	229410000	81793000	151100000	179850000	121520000
YML034W	439160000	444050000	426590000	446580000	540930000	440450000	328240000	379780000	353650000	380510000	376550000	349100000
YGR020C	424780000	595190000	293170000	421440000	540660000	415670000	600950000	521620000	241680000	425840000	555060000	422730000
YOL088C	396880000	335720000	352770000	445220000	540100000	476410000	413150000	347390000	414240000	410070000	441240000	461700000
YPL265W	560240000	489890000	598300000	443630000	539930000	410690000	538420000	645600000	547120000	476500000	558580000	488280000
YOR090C	449710000	522160000	460100000	569120000	539880000	455250000	388760000	389580000	330720000	423840000	482460000	405680000
YDR143C	526100000	605510000	550550000	476240000	539590000	471340000	548650000	619900000	546680000	462420000	492300000	527030000
YNL041C	500660000	502360000	463590000	598740000	538410000	449200000	602600000	581590000	463920000	467090000	566790000	479030000
YHR076W	523250000	511080000	487190000	518140000	536600000	562420000	323940000	295670000	286340000	380020000	441810000	365970000
YJL217W	422040000	318710000	360730000	499200000	536550000	683250000	228250000	219190000	282610000	399410000	269500000	327990000
YPL030W	661200000	559740000	575400000	573840000	535630000	550430000	813670000	712060000	772730000	640770000	648570000	700950000
YER069W	494240000	499730000	544170000	501370000	534270000	566550000	142670000	160710000	185850000	262410000	252920000	285020000
YDR527W	490090000	591830000	470320000	409810000	533250000	371980000	539340000	574270000	498150000	406160000	452910000	454540000
YKL079W	493740000	475610000	443320000	565840000	532940000	628110000	558200000	551100000	566150000	692710000	633040000	614290000
YMR062C	378400000	397050000	426870000	488510000	532900000	477280000	345450000	379570000	367390000	401210000	434450000	399340000
YKL087C	373350000	413150000	424400000	467910000	531880000	461010000	210350000	234770000	201790000	254890000	269440000	225040000
YHR192W	398460000	447290000	351280000	523040000	530970000	372620000	485410000	484780000	369200000	458980000	526930000	485050000
YNL091W	445250000	564740000	449290000	549240000	529500000	476210000	487720000	503080000	426050000	402830000	491030000	461490000
YER027C	469050000	615460000	451550000	545840000	529240000	454770000	384560000	474420000	366820000	376300000	449910000	424730000
YMR184W	275360000	342410000	295860000	496410000	527810000	476620000	329550000	327680000	265090000	643710000	638430000	600200000
YOL090W	511240000	498480000	506570000	562510000	527610000	627110000	523590000	511840000	578820000	564910000	546380000	569190000
YIL016W	548930000	560130000	546840000	637070000	525290000	505440000	753830000	679020000	620790000	609150000	719000000	569160000
YKL078W	687920000	653860000	708150000	521610000	524670000	605460000	931030000	895660000	1090100000	715690000	671710000	686270000
YJR032W	523960000	575260000	553830000	606740000	524600000	565620000	572300000	501350000	569990000	562750000	585970000	578020000
YNL330C	591520000	504960000	630120000	531840000	524590000	570900000	516680000	474280000	553600000	570030000	475060000	576300000
YDR510W	848800000	650050000	946900000	357780000	523380000	725160000	479870000	420790000	660910000	764210000	550280000	706390000
YBR014C	406360000	524680000	475560000	475230000	523050000	372010000	375460000	435050000	306000000	372310000	520300000	387160000
YKL155C	410450000	466740000	399050000	474770000	521130000	418380000	280860000	286720000	233200000	280740000	352170000	270130000
YGR012W	544870000	513990000	554120000	591140000	521000000	552560000	536340000	489730000	540010000	597590000	571990000	612970000
YGR033C	456880000	459630000	531600000	632110000	520660000	477710000	460860000	521860000	398420000	416710000	568620000	403240000
YKL186C	405430000	423150000	453800000	489680000	519600000	509570000	735470000	633780000	588870000	558450000	552660000	545830000
YOR288C	412060000	359820000	388640000	549790000	518790000	409770000	382410000	395970000	303740000	529740000	668670000	493340000
YDR333C	567340000	600870000	578050000	499970000	518690000	493060000	634230000	610300000	672780000	544050000	585980000	566830000
YJL143W	604200000	508950000	654410000	400060000	517360000	725770000	309070000	353770000	582420000	446170000	303130000	502120000
YGL100W	576760000	479480000	603860000	634420000	516820000	671690000	532070000	424480000	596130000	642970000	622250000	591310000
YNL274C	345880000	360180000	343690000	577690000	515790000	538880000	332440000	299110000	323750000	564090000	570480000	580980000
YJR092W	399270000	461920000	448830000	531980000	515220000	402720000	402370000	502810000	361790000	296860000	389050000	332810000
YIL003W	976100000	705180000	1209200000	849590000	513290000	823410000	708920000	634440000	1029000000	801220000	592340000	850120000
YHR012W	525450000	529980000	529790000	540260000	512870000	491680000	528140000	491040000	466970000	561280000	562500000	565070000
YPL139C	498440000	543600000	524520000	533720000	511290000	536160000	525000000	484610000	504320000	448130000	493840000	447480000
YKL203C	566900000	550990000	676400000	318540000	511210000	579430000	371030000	349140000	496580000	531220000	409240000	504120000
YFL013C	390940000	500320000	395310000	473610000	510220000	398190000	570590000	592890000	436120000	438270000	554310000	418000000
YAL041W	536130000	577230000	557110000	586980000	509640000	589270000	464610000	458180000	525050000	517330000	501150000	561420000
YIL020C	558610000	507900000	525200000	621140000	509340000	594120000	646800000	614370000	644510000	597510000	605360000	610520000
YGR081C	649780000	581310000	1083400000	296490000	508720000	917110000	496360000	587670000	1010800000	683510000	300090000	790160000
YGR195W	531090000	489880000	506900000	582160000	508300000	455310000	637660000	711680000	587820000	571770000	595230000	559350000
YMR054W	479910000	334490000	407000000	570720000	508070000	509870000	342260000	358410000	355830000	433540000	500120000	432340000
YPL081W	530670000	537190000	785880000	321940000	507570000	635770000	310280000	361820000	475680000	425540000	309280000	494560000
YMR075W	447110000	501540000	449730000	546400000	507210000	376330000	538510000	556090000	419690000	411130000	521340000	457430000
YLR386W	502440000	480430000	469310000	496330000	506760000	517430000	792530000	803100000	864470000	867360000	751100000	1013000000
YIL103W	759560000	677120000	843760000	553010000	506630000	757210000	882670000	813270000	933080000	772400000	689130000	785110000
YKL151C	433660000	433070000	425420000	473550000	505470000	506010000	247610000	254310000	232190000	419480000	361640000	408620000
YLR174W	341690000	284680000	371540000	631730000	503870000	568660000	797630000	530860000	653940000	787690000	437960000	599180000
YNL233W	418550000	465720000	396300000	467380000	503000000	416410000	390930000	450370000	312170000	350550000	401270000	326890000
YIL039W	430510000	424380000	463720000	619440000	502970000	486860000	607260000	499300000	521390000	494720000	639850000	522190000
YOR343W-B;YOR192C-B;YDR210W-B;YDR261W-B	350870000	595220000	386660000	582810000	502020000	496190000	350570000	364460000	411550000	351860000	328720000	343430000
YLR378C	518830000	436070000	553770000	622380000	501630000	599340000	883890000	847110000	813690000	915640000	938600000	894420000
YKL214C	667710000	741070000	810240000	376620000	501080000	636150000	472470000	542790000	625250000	571080000	386390000	611260000
YDL117W	376830000	413680000	349090000	447010000	500960000	419080000	323150000	367360000	295900000	324430000	394710000	344780000
YLR370C	481110000	397310000	461890000	706900000	495290000	521620000	753650000	551550000	539840000	743620000	702470000	789310000
YOR078W	1471800000	1712600000	1499700000	481070000	495210000	1303100000	946990000	829740000	2041500000	1473800000	541540000	1980300000
YNL039W	450200000	515070000	447120000	423860000	495070000	366060000	414820000	436440000	373740000	318280000	410910000	365150000
YML054C	393730000	350340000	431630000	459440000	495020000	467990000	429880000	326460000	320240000	241270000	198560000	212600000
YLR411W	621050000	310730000	543480000	678160000	493180000	615780000	680720000	331040000	662090000	371340000	290530000	232680000
YJL092W	632770000	573360000	487770000	774210000	492510000	312630000	344800000	330600000	367490000	312110000	267010000	331190000
YHR043C;YHR044C	334920000	300070000	352270000	466850000	492260000	446220000	403300000	397160000	370640000	743270000	802330000	674170000
YDR458C	489950000	421980000	443600000	547350000	492250000	456460000	559490000	556060000	438280000	433880000	554680000	443670000
YML079W	374620000	462150000	353930000	426220000	490590000	369700000	357480000	390840000	305390000	419730000	398950000	433130000
YCL061C	442070000	522580000	445410000	498790000	489440000	410990000	391980000	442810000	314680000	324090000	359200000	317510000
YJR049C	376000000	435740000	346000000	587940000	489350000	442640000	421240000	458760000	378280000	412890000	447750000	325130000
YER143W	434630000	478090000	408910000	556030000	487530000	474930000	502940000	510720000	492030000	574200000	615790000	545350000
YBL016W	672000000	695790000	725250000	483440000	487470000	601720000	672080000	608710000	687520000	711130000	739960000	717490000
YFR049W	318980000	401230000	415940000	414700000	485910000	436050000	276130000	235780000	199940000	322340000	282540000	291510000
YDL207W	425990000	390600000	398060000	481990000	484910000	335630000	410970000	533880000	431320000	362970000	442880000	333060000
YLR038C	204510000	265010000	222760000	378030000	484620000	273960000	281390000	293190000	173070000	172880000	387440000	182650000
YNL099C	309240000	316170000	335530000	362720000	484270000	329890000	274100000	340570000	251220000	281850000	371820000	265770000
YFL001W	744550000	865800000	822100000	509440000	481690000	670090000	633020000	645400000	772810000	587570000	501930000	649740000
YDR272W	491640000	572390000	572540000	463480000	481200000	421700000	424280000	496760000	454570000	455280000	465100000	434870000
YER100W	664180000	683310000	651110000	502920000	480720000	566250000	604870000	670980000	681960000	574400000	594490000	602320000
YIR001C	477020000	577860000	578100000	404760000	479380000	525360000	304370000	378020000	374850000	395700000	429850000	377490000
YBL107C	346280000	432840000	381890000	359610000	479220000	405510000	286130000	303590000	300620000	373570000	339290000	356410000
YNR060W	481610000	388620000	451040000	556170000	477710000	298430000	1610200000	1437500000	1162600000	610960000	1004000000	676510000
YGL139W	413970000	483800000	453480000	400610000	476760000	380840000	438470000	405530000	384830000	305680000	282420000	364000000
YLR291C	688750000	503020000	599140000	615210000	476090000	669410000	1084100000	907660000	1286800000	1033500000	938760000	1041600000
YCR069W	434000000	396970000	425090000	512540000	475920000	460430000	386170000	389520000	399690000	506120000	406000000	477320000
YBR126W-A	266740000	229880000	239380000	494620000	475450000	312410000	343830000	246780000	190690000	288220000	374740000	228600000
YNL068C	477480000	527260000	473770000	479300000	475030000	418830000	493690000	544270000	434140000	386200000	422290000	397540000
YJL005W	489030000	529840000	469150000	476920000	474960000	470460000	425400000	442590000	401660000	446560000	399330000	437250000
YMR275C	480110000	492320000	452240000	621790000	474750000	497550000	476710000	427960000	413730000	455250000	530840000	449230000
YJL061W	588020000	452690000	509850000	484460000	474430000	555260000	503290000	510270000	627860000	563580000	478680000	579400000
YIL036W	417980000	530720000	427510000	430240000	473310000	398740000	375720000	417550000	365610000	363630000	457150000	422360000
YDR017C	434050000	521290000	477610000	441680000	473020000	434370000	444260000	459900000	410830000	394180000	415440000	408910000
YMR037C	433110000	518770000	435770000	415160000	471250000	389940000	376420000	412650000	343060000	359080000	421980000	371660000
YPR143W	1213100000	1466000000	1017800000	425100000	470780000	772310000	678230000	597370000	1056600000	879950000	420120000	907360000
YBL038W	349800000	514180000	535890000	370250000	469820000	528100000	239760000	254850000	225660000	277130000	262400000	312430000
YBR260C	463490000	517270000	489560000	537220000	468910000	441290000	479820000	499220000	471820000	483880000	517060000	414590000
YHR056C	591950000	552100000	552880000	541980000	466870000	517750000	430170000	553930000	447150000	449160000	445020000	442590000
YLL036C	440390000	441570000	449720000	528010000	466070000	434630000	954120000	905870000	883200000	770930000	863810000	825690000
YLR181C	419540000	463610000	423840000	466230000	465760000	466950000	865520000	929150000	893430000	808320000	945230000	821820000
YGL246C	660600000	510700000	618530000	565710000	465650000	652470000	767980000	641420000	988580000	764810000	547480000	743710000
YBR200W	513370000	507320000	436110000	519230000	464890000	516480000	614730000	585330000	523340000	485370000	524940000	507790000
YMR061W	487950000	595620000	437880000	572460000	463970000	365700000	516390000	555220000	440840000	396960000	508890000	402570000
YER112W	577270000	631170000	872960000	373470000	463330000	884160000	457110000	369060000	711660000	733290000	359130000	841560000
YER105C	585480000	455430000	588160000	514180000	463140000	596920000	454580000	394360000	476700000	470650000	416290000	458360000
YDL099W	605250000	574670000	589770000	317720000	462690000	524310000	325230000	372340000	477380000	535290000	339610000	546500000
YDL111C	749850000	631950000	743530000	471870000	462560000	603500000	698650000	624290000	835740000	649460000	526500000	658840000
YHR034C	372450000	384770000	401520000	433250000	462270000	384110000	497400000	468160000	425000000	449170000	493620000	413350000
YPL055C	464950000	628270000	476570000	446060000	462080000	407610000	440360000	448790000	368110000	369610000	438390000	372840000
YJL042W	420780000	471310000	408640000	432820000	461180000	396770000	231280000	209800000	180130000	211080000	244610000	231750000
YDL190C	381680000	380980000	395680000	534970000	461150000	476800000	411000000	408440000	360440000	387300000	456230000	459750000
YIL095W	446660000	499030000	411260000	425200000	461120000	350600000	468150000	479330000	401400000	415420000	427060000	411600000
YJR086W	331990000	415160000	311030000	442340000	460390000	314740000	431920000	484860000	294470000	272610000	427080000	269450000
YPR172W	301570000	451630000	318810000	394380000	460140000	407870000	348770000	369430000	316380000	329090000	419270000	362180000
YDL164C	472900000	465430000	522650000	521850000	458620000	487250000	445460000	453000000	430820000	463210000	499140000	447480000
YML032C	453410000	465750000	404380000	413850000	458580000	383370000	452700000	531720000	441790000	417600000	452100000	433390000
YKR070W	572430000	657600000	578960000	518830000	458540000	467720000	426430000	392620000	375670000	512310000	526050000	475270000
YKR042W	296700000	318410000	282170000	426130000	457820000	359690000	260250000	238920000	242110000	948060000	918200000	931740000
Q0045	269570000	180780000	218270000	544940000	457590000	250410000	216680000	150200000	110770000	182890000	243870000	141260000
YMR178W	416360000	402640000	406990000	509460000	457510000	421690000	500750000	417670000	417630000	493800000	556340000	477580000
YJR091C	318680000	382650000	319730000	424880000	456700000	342140000	337120000	376360000	288240000	376810000	435470000	368420000
YLR110C	514830000	497100000	475150000	443680000	454550000	930240000	366850000	352680000	695790000	2363400000	1308500000	2334500000
YMR110C	385300000	405440000	392180000	524850000	454410000	496350000	475280000	418100000	368760000	554900000	581300000	593250000
YFR041C	380460000	376540000	418680000	415060000	453220000	393630000	287930000	286000000	322200000	511580000	414580000	402900000
YHR001W-A	513090000	687420000	488570000	458950000	452900000	610050000	185840000	191830000	196950000	336760000	203170000	280440000
YHR103W	391140000	473580000	390590000	461870000	452680000	392090000	376430000	403250000	327410000	358200000	373270000	338460000
YOL130W	459920000	528660000	441590000	451400000	451470000	385700000	462420000	516530000	380880000	322870000	390830000	338800000
YER166W	409100000	413110000	403710000	430870000	449890000	334780000	307980000	324230000	258690000	339860000	353630000	341130000
YNL050C	629960000	611350000	592250000	412610000	448990000	568800000	511620000	574620000	631890000	515520000	435550000	502510000
YGL196W	452800000	475210000	474700000	470630000	448570000	520520000	343730000	345830000	314090000	452950000	464380000	378180000
YGR048W	399470000	467790000	428550000	456170000	448390000	441610000	473470000	512710000	501080000	578120000	592790000	554380000
YKL110C	465210000	451600000	514500000	509250000	447530000	603520000	514220000	534610000	697920000	609630000	571000000	656840000
YNL155W	437680000	454600000	401000000	529170000	446900000	362150000	544630000	728350000	562040000	448230000	537580000	416240000
YJL101C	553320000	616890000	576990000	496260000	446360000	505900000	422980000	481690000	502580000	457120000	443730000	461130000
YDR449C	599930000	512950000	580290000	527190000	446280000	544850000	674130000	623840000	750320000	625930000	534170000	668870000
YHR132C	707120000	493890000	667380000	501350000	446240000	594700000	477620000	358310000	545330000	677720000	499230000	526710000
YOR039W	508680000	367300000	454440000	445040000	445900000	540620000	373770000	322330000	449660000	469800000	377150000	451990000
YHR201C	619420000	477760000	628490000	629950000	445570000	669490000	638930000	617960000	705820000	641350000	642010000	734170000
YDL044C	350310000	491810000	383110000	419940000	445550000	448880000	260480000	291170000	286380000	321020000	339230000	348810000
YMR074C	361440000	348980000	674750000	317820000	444260000	610420000	699760000	536690000	1007800000	640280000	519110000	679450000
YNL317W	474170000	469610000	493160000	445060000	444170000	501310000	457540000	417330000	624370000	512930000	448430000	573140000
YKL103C	372180000	373650000	399320000	457730000	443320000	432010000	282390000	261340000	319110000	390750000	348020000	410020000
YBR058C	397410000	420350000	413870000	486480000	442980000	377330000	455180000	484910000	419680000	453560000	459450000	418670000
YLR262C	328500000	310240000	286410000	452190000	442400000	309310000	763460000	779290000	742790000	558630000	812880000	638120000
YKL039W	240360000	247310000	271140000	469340000	442390000	290680000	264080000	251620000	223290000	265180000	380210000	246380000
YHR073W	495790000	582620000	500030000	479140000	441250000	520020000	451940000	466510000	455060000	520100000	498350000	545840000
YBR159W	420930000	279690000	417250000	531870000	441140000	627330000	381170000	322920000	493530000	548810000	449930000	612440000
YPR023C	444540000	493280000	454220000	424120000	440220000	411990000	453430000	444550000	428200000	438980000	469410000	441790000
YKR084C	427750000	476150000	487370000	450540000	439790000	440510000	556160000	529850000	520070000	525120000	531080000	475610000
YER141W	460670000	418290000	572890000	438080000	439440000	641210000	285970000	232070000	386170000	353790000	270740000	332940000
YJL011C	427200000	548620000	484810000	366210000	439280000	391870000	607670000	593310000	522490000	394200000	424440000	381460000
YKR028W	402350000	392740000	385110000	425640000	439110000	437390000	383440000	399940000	330960000	385160000	424510000	419020000
YPL116W	518030000	421120000	444120000	477680000	438970000	578370000	369270000	392630000	429740000	478750000	456780000	441730000
YDR237W	473640000	525650000	401230000	412320000	438410000	514150000	243520000	222730000	238290000	277840000	220070000	249900000
YOR008C	301720000	375600000	284180000	410960000	438410000	301270000	354710000	419990000	323210000	320520000	481140000	338360000
YML071C	366260000	412660000	331660000	429760000	438050000	367740000	392730000	428740000	356490000	381970000	504970000	355200000
YNL306W	292740000	355680000	261130000	374980000	437870000	334590000	212550000	243200000	150930000	178810000	259370000	193400000
YJR132W	451080000	471470000	418620000	493800000	437810000	438790000	563550000	551220000	567160000	549040000	633320000	544860000
YFL002C	635220000	549220000	608700000	503630000	436700000	572350000	591970000	640890000	674770000	614080000	523700000	616960000
YMR102C	398610000	449350000	360860000	406440000	436540000	441510000	281720000	276200000	254870000	326190000	337280000	362580000
YGL020C	268360000	236050000	308860000	469650000	435910000	354100000	429010000	415640000	393340000	342540000	477280000	422640000
YJR083C	330000000	388920000	413990000	406800000	435150000	373730000	366830000	431050000	348280000	378770000	365740000	428370000
YHR084W	515190000	515060000	461990000	456900000	434180000	420650000	486970000	441280000	399140000	374320000	435080000	328960000
YBL035C	488420000	522140000	517370000	436280000	434100000	450070000	398870000	363280000	411120000	368060000	367080000	411790000
YFL047W	367710000	403220000	408720000	433300000	433490000	393210000	358560000	362400000	381400000	360020000	413850000	439510000
YKL042W	388860000	434350000	467810000	377070000	433230000	412420000	295340000	378090000	327060000	318640000	379560000	326800000
YLR403W	405320000	470510000	418490000	417520000	432990000	357700000	629860000	724720000	551610000	445230000	559420000	514900000
YER016W	489900000	493280000	425550000	379950000	432720000	381210000	341300000	363960000	347940000	372560000	429690000	396530000
YJL066C	247670000	265320000	216040000	370990000	430990000	305920000	177540000	191070000	148220000	267330000	249730000	269190000
YIL046W	207400000	362970000	228080000	396540000	430010000	290620000	312790000	465640000	445860000	232730000	421290000	495850000
YNR022C	250540000	302250000	288430000	324960000	429960000	407970000	184760000	216300000	174790000	162850000	186460000	168880000
YMR216C	470530000	562290000	450180000	474130000	429000000	430770000	472000000	484460000	402920000	416290000	402420000	405880000
YPL245W	440470000	432010000	531330000	496220000	428690000	467250000	1315300000	1285500000	1207900000	905000000	1017400000	866140000
YDR122W	290950000	363020000	312500000	404840000	427990000	367770000	260360000	276130000	186110000	308410000	373590000	297770000
YGR232W	459670000	378720000	412020000	538870000	426570000	589090000	316820000	260460000	348200000	433700000	400210000	416810000
YDR369C	304590000	389170000	333160000	343480000	426310000	680200000	363110000	429610000	333130000	590130000	477730000	384830000
YPL088W	183290000	144920000	201850000	484660000	426130000	543110000	210740000	151280000	248370000	716680000	706890000	846160000
YGR156W	450500000	404330000	450240000	412700000	425980000	411270000	467330000	428180000	410530000	401800000	463980000	394710000
YOR164C	488990000	381740000	543570000	507020000	425330000	625560000	523280000	456980000	608740000	660980000	544240000	610540000
YAL030W	332550000	359420000	331210000	335280000	424880000	275680000	278960000	309160000	232670000	282960000	319490000	209990000
YCL044C	468740000	386570000	461890000	470420000	424710000	511990000	392090000	381780000	416470000	462650000	471290000	493340000
YNL124W	489870000	542620000	383020000	477770000	424640000	359140000	658690000	746690000	617130000	470650000	457700000	397640000
YKL135C	467250000	534120000	509930000	443410000	423520000	492480000	402050000	459360000	495410000	473850000	438230000	508050000
YER172C	348690000	344800000	317600000	421650000	421440000	312020000	425360000	459450000	365170000	341780000	444310000	352070000
YJL115W	695870000	744560000	795120000	299470000	420890000	612150000	362590000	411690000	617080000	667440000	378190000	609350000
YMR152W	367010000	353660000	414170000	520810000	420350000	569520000	350500000	292050000	330490000	407110000	382230000	492880000
YPR100W	268760000	358170000	333960000	337690000	420240000	328320000	170480000	200350000	168200000	171190000	210170000	161580000
YBR227C	455910000	529960000	471710000	451260000	419260000	421020000	487540000	493420000	392970000	437670000	522530000	464540000
YOR367W	405600000	451010000	483480000	404910000	419150000	393350000	312010000	292050000	291360000	308470000	309330000	265960000
YNL076W	348240000	439410000	387680000	387820000	417940000	347660000	375420000	430950000	343550000	363700000	454230000	369510000
YBR170C	414010000	457280000	445880000	443630000	417120000	461810000	411040000	444900000	453550000	526250000	514480000	571320000
YDR372C	468160000	309670000	443760000	581990000	416060000	691360000	495690000	418900000	595260000	693560000	541260000	814390000
YDR505C	307660000	325960000	342830000	419280000	415850000	372180000	238190000	247460000	279830000	365070000	339270000	332000000
YDL224C	358630000	462920000	361140000	415970000	415430000	363410000	294610000	341460000	253210000	251950000	331570000	281980000
YLR328W	575110000	501320000	592360000	443200000	415180000	525420000	908740000	925210000	1029800000	961980000	943020000	959130000
YEL038W	285130000	269840000	272240000	314080000	412950000	293370000	358090000	341630000	258760000	251780000	316100000	300720000
YOR014W	317770000	326800000	319300000	410170000	412810000	346470000	314800000	323390000	248520000	303510000	336580000	313010000
YOR241W	454950000	392360000	456540000	475260000	412620000	529190000	405660000	347160000	427480000	435090000	445140000	453600000
YLR274W	517430000	376950000	538670000	425430000	412570000	640860000	608640000	625760000	1045600000	798680000	566850000	741440000
YOR127W	310640000	352890000	303770000	395440000	412130000	337300000	311100000	352010000	298050000	431240000	540690000	431590000
YKR090W	425810000	535390000	429990000	396190000	411910000	401040000	319510000	360600000	343220000	314420000	328150000	323660000
YBL057C	553110000	473770000	509940000	469840000	411520000	537660000	467870000	437610000	563870000	545810000	457810000	475550000
YKL154W	433160000	359550000	407640000	495920000	411080000	356300000	480480000	512400000	446700000	406820000	464220000	417850000
YML062C	395910000	450690000	411120000	337990000	410550000	353950000	400640000	448520000	390270000	406070000	420810000	364860000
YMR237W	426170000	395890000	577490000	464440000	410440000	456350000	361900000	365660000	424150000	439800000	441640000	447460000
YDR516C	562920000	369890000	505480000	460760000	410300000	624650000	492130000	477770000	826550000	643240000	481320000	688790000
YOR196C	403700000	457700000	378390000	399480000	409310000	344900000	344170000	328030000	283000000	289120000	364860000	292730000
YJL081C	386340000	439840000	409270000	380950000	409280000	396450000	337040000	386930000	436150000	335700000	417410000	439960000
YGL115W	428320000	346900000	461120000	401410000	409280000	527480000	300470000	292100000	382900000	391480000	340770000	373090000
YGL087C	411140000	398350000	470170000	288180000	409170000	485470000	314460000	322030000	385320000	501290000	361020000	485060000
YER111C	390870000	452540000	414730000	371760000	408400000	402510000	400000000	408680000	386650000	374670000	375460000	388020000
YNL074C	335010000	437570000	344610000	375270000	408130000	330490000	294890000	340980000	234510000	256190000	320890000	235500000
YLR407W	483850000	589790000	505320000	351860000	408090000	415230000	763410000	832530000	909060000	754360000	725330000	758840000
YIL079C	440760000	466910000	377400000	345280000	408050000	280700000	457270000	485510000	405640000	303520000	342930000	318450000
YDR362C	433000000	475040000	483400000	292400000	407580000	450370000	438040000	366930000	439600000	383660000	408000000	416300000
YIR038C	327780000	319450000	386590000	495350000	407010000	515680000	161830000	173330000	202210000	330180000	258450000	305920000
YLR055C	493810000	453170000	538570000	528580000	405620000	384230000	1168700000	1053300000	1026600000	879310000	997880000	750800000
YDR460W	342470000	391070000	337450000	360170000	405400000	328040000	430670000	500880000	351250000	338380000	419360000	351760000
YOR174W	389980000	489600000	450370000	345770000	404890000	388930000	350670000	375580000	406610000	413100000	354900000	421140000
YMR277W	407570000	440970000	415100000	397720000	404750000	368530000	456260000	477810000	467790000	351730000	417600000	399000000
YIL129C	350120000	365660000	401680000	434900000	404370000	402470000	418250000	427710000	498150000	420020000	451600000	386880000
YHR081W	525860000	635100000	736010000	277670000	403390000	620690000	467760000	477470000	685700000	526810000	307970000	620610000
YBR171W	383840000	349560000	352990000	414340000	402930000	398500000	377070000	382420000	365600000	462190000	484800000	456530000
YML059C	502020000	514590000	499520000	502650000	401980000	503910000	423660000	449270000	442290000	406770000	454910000	439620000
YPL263C	573870000	499210000	525530000	462820000	401680000	453830000	659150000	596920000	620840000	470420000	487390000	520000000
YMR134W	316850000	233870000	269820000	457670000	400670000	305920000	560340000	502340000	501590000	488430000	508080000	418400000
YKR067W	289900000	265930000	296660000	417680000	400270000	346160000	274380000	266780000	241700000	286480000	332330000	288120000
YML036W	255690000	252210000	242400000	361540000	399950000	270020000	325080000	342330000	246000000	243450000	348350000	253500000
YLR433C	528520000	519940000	575160000	399520000	399690000	490490000	1127000000	1218300000	1281100000	1060300000	1022600000	1055700000
YDR176W	330040000	398420000	327680000	339220000	399430000	285100000	321550000	359130000	276100000	256720000	361770000	276900000
YIL083C	572730000	414660000	551200000	445180000	396050000	484450000	626180000	565420000	704450000	671830000	494020000	573600000
YGR136W	386780000	438110000	480900000	360940000	395800000	509810000	355960000	350550000	389610000	395730000	395280000	354770000
YLR258W	358850000	309200000	369340000	339020000	394640000	488930000	362960000	301100000	449330000	579100000	302080000	522390000
YHR198C	481910000	421530000	405490000	370020000	393840000	430770000	166390000	141380000	157920000	246790000	189210000	228100000
YOR355W	376620000	458870000	425180000	315050000	393530000	329110000	249760000	274120000	222010000	204130000	202840000	196780000
YDR054C	491200000	445890000	462150000	361750000	393170000	354940000	526930000	475150000	539210000	439910000	383010000	411560000
YML014W	490440000	510570000	505890000	408790000	393010000	481910000	538480000	537570000	551280000	478070000	432590000	551000000
YNL321W	291050000	301400000	291810000	377540000	392680000	321450000	294520000	335710000	240430000	265610000	367240000	312060000
YDL223C	317140000	347870000	303020000	402860000	392400000	365440000	137450000	103320000	67110000	374860000	462680000	403120000
YHR087W	854860000	1071500000	600900000	273760000	392350000	768310000	217520000	168760000	230500000	1240500000	668720000	1519900000
YDR531W	430530000	458650000	503320000	409220000	392260000	532770000	416080000	345020000	648190000	437760000	347170000	529590000
YOR265W	242320000	331720000	193980000	253810000	392130000	232910000	317600000	291040000	139220000	182110000	341500000	160960000
YAL049C	381580000	393830000	364140000	438080000	391980000	358090000	492500000	425900000	351400000	442630000	479880000	410310000
YDR280W	401010000	378640000	348220000	426720000	391890000	397220000	556220000	605320000	502840000	399440000	507920000	394310000
YKR079C	438350000	421420000	489900000	431240000	391110000	521050000	376660000	335030000	418960000	436310000	385240000	455700000
YER099C	405260000	362490000	335690000	464580000	390640000	384180000	502770000	519020000	495530000	423150000	496600000	455310000
YDR164C	401350000	378870000	401370000	371030000	390420000	358210000	431040000	424110000	409530000	420250000	437750000	409490000
YIL027C	378070000	349110000	343120000	443430000	389830000	567170000	495340000	483190000	617250000	570860000	534790000	675110000
YDR229W	349240000	357380000	331500000	320670000	389080000	285540000	320000000	336480000	265500000	281400000	328940000	296250000
YDR097C	430990000	404170000	412020000	435290000	388370000	443390000	400180000	375530000	396130000	371840000	390420000	376420000
YBR074W	304760000	321020000	260980000	407270000	388240000	277020000	327370000	318900000	259530000	265120000	341360000	271040000
YDL101C	317910000	300440000	311210000	348680000	387790000	311360000	318640000	348230000	315810000	289520000	384230000	308360000
YNR034W	361130000	323340000	380640000	400310000	387250000	337270000	457840000	469270000	465680000	424480000	530310000	424270000
YDL167C	444820000	579220000	463890000	432860000	387010000	352590000	477080000	513810000	456810000	378800000	367450000	358530000
YLR214W	721010000	295130000	521520000	454720000	386340000	353790000	728060000	347440000	599300000	352770000	348920000	249370000
YOR211C	334300000	366660000	332900000	408760000	382260000	422680000	311090000	272110000	308260000	342450000	358310000	318670000
YMR076C	350460000	321150000	341410000	362540000	381950000	338930000	236750000	232990000	241960000	229710000	246880000	253780000
YNL106C	388850000	431230000	338700000	421320000	381100000	339450000	374590000	472010000	363690000	439410000	508240000	520360000
YKL141W	234210000	230940000	323900000	599250000	381000000	394580000	266450000	213320000	168770000	211790000	242090000	183380000
YKL088W	518900000	520270000	504340000	445170000	380590000	448060000	499140000	539110000	508280000	432680000	477510000	508070000
YNR026C	345590000	360710000	354120000	447550000	380150000	350520000	528750000	493900000	390770000	502650000	645280000	445370000
YOL115W	375600000	328160000	317870000	420090000	379100000	293620000	557490000	521900000	446820000	378660000	460340000	354890000
YFL041W	307760000	274730000	297590000	420690000	378070000	376570000	291230000	253630000	263500000	376330000	374290000	329590000
YNL026W	286780000	213190000	248580000	390060000	377540000	305560000	266090000	243370000	228480000	267930000	264850000	289520000
YER022W	344450000	335370000	285750000	361970000	376790000	360570000	288030000	361550000	320920000	319800000	361180000	333450000
YEL011W	342450000	296240000	317180000	413450000	375690000	420580000	236180000	188040000	208020000	230230000	169830000	199070000
YIL048W	289380000	313420000	316120000	370990000	375660000	344790000	381930000	362610000	345590000	328200000	407830000	384300000
YNL272C	350480000	376900000	411540000	408140000	375070000	397660000	356640000	368370000	355820000	356600000	359590000	314370000
YLL043W	355220000	433260000	326110000	373260000	374930000	304530000	849480000	885800000	737650000	696080000	989320000	722040000
YHR038W	274610000	318020000	412340000	349430000	374130000	487690000	198360000	166790000	202330000	250540000	222220000	251120000
YDL236W	508800000	351920000	447890000	548930000	373260000	597640000	657050000	555450000	812540000	751870000	670870000	787280000
YDL047W	431350000	390480000	448710000	424170000	373060000	508750000	466360000	420070000	512770000	480380000	501270000	514350000
YDR533C	306690000	315170000	268380000	321750000	372250000	326220000	179850000	165560000	104940000	206210000	199310000	219030000
YOL081W	344150000	463890000	371650000	450380000	372210000	372850000	379280000	358230000	418190000	307670000	335620000	313610000
YDR519W	892870000	649930000	785630000	349560000	371780000	756810000	385060000	312530000	615350000	1207000000	564400000	1098800000
YLR372W	721780000	466900000	546340000	333150000	371120000	864770000	716510000	714730000	906600000	665050000	624110000	1143300000
[truncated: 1,906 more rows]
